# Supplementary material for: CYRI/ Fam49 Proteins Represent a New Class of Rac1 Interactors
Source: Commun Integr Biol. 2019 Jul 23;12(1):112–8. doi: 10.1080/19420889.2019.1643665 (PMC6682259; doi:10.1080/19420889.2019.1643665)
Supplement: Supplemental Material [file kcib-12-01-1643665-s001.xlsx]

## Sheet: Sheet1
id	Majority protein IDs	Gene names	Protein names	Peptides	Unique peptides	Sequence coverage [%]	Mol. weight [kDa]	Sequence length	Score	Phospho (STY) site positions	T-test Difference GFP / Rac1-Double	T-test Difference GFP / Rac1-Single	T-test Difference Rac1-Single / Rac1-Double		-Log T-test p-value GFP / Rac1-Double	-Log T-test p-value GFP / Rac1-Single	-Log T-test p-value Rac1-Single / Rac1-Double	T-test Significant GFP / Rac1-Double	T-test Significant GFP / Rac1-Single	T-test Significant GFP / Rac1-Single / T-test Significant GFP / Rac1-Double	T-test Significant Rac1-Single / Rac1-Double		Unique peptides Rac1-Single r03	Unique peptides Rac1-Single r02	Unique peptides Rac1-Single r01	Unique peptides Rac1-Double r02	Unique peptides Rac1-Double r03	Unique peptides Rac1-Double r01	Unique peptides GFP r03	Unique peptides GFP r01	Unique peptides GFP r02	Intensity Sum		LFQ intensity GFP_r01	LFQ intensity GFP_r02	LFQ intensity GFP_r03	LFQ intensity Rac1-Double_r01	LFQ intensity Rac1-Double_r02	LFQ intensity Rac1-Double_r03	LFQ intensity Rac1--Single_r01	LFQ intensity Rac1--Single_r02	LFQ intensity Rac1--Single_r03		Fasta headers
3692	JAW003;JAW002	Rac1	pGFP-C1-Rac1 (P29S/Q61L), Related to Project JAW_R02_100518;in|JAW002|pGFP-C1-Rac1 (Q61L), Related to Project JAW_R02_100518	60	26	85.4	49.104	438	323.31		-7.72712	-7.35101	-0.376118		2.80862	2.72143	1.4318	+	+	+_+			23	23	21	22	26	23	6	6	8	1135200000000		28.4887	29.8015	26.3512	35.9211	35.8407	36.061	35.4557	35.7724	35.4663		in|JAW003|pGFP-C1-Rac1 (P29S/Q61L), Related to Project JAW_R02_100518;in|JAW002|pGFP-C1-Rac1 (Q61L), Related to Project JAW_R02_100518
3029	A0A0D9S4H3;Q92616	GCN1L1	Translational activator GCN1	180	180	72.7	292.71	2671	323.31		-6.31749	-6.10403	-0.213462		5.19595	4.34786	0.299206	+	+	+_+			158	173	171	164	167	169	29	17	19	203670000000		26.8312	26.8933	27.3799	33.1505	33.3987	33.5077	33.3589	33.4554	32.6022		tr|A0A0D9S4H3|A0A0D9S4H3_CHLSB Uncharacterized protein OS=Chlorocebus sabaeus GN=GCN1 PE=4 SV=1;sp|Q92616|GCN1_HUMAN eIF-2-alpha kinase activator GCN1 OS=Homo sapiens GN=GCN1 PE=1 SV=6
1681	A0A0D9RHM3;Q9HAV4	XPO5	Exportin-5	83	83	78.3	136.45	1205	323.31		-8.38932	-8.02642	-0.362902		4.78388	4.31694	0.561195	+	+	+_+			73	78	76	78	78	79	5	4	7	161430000000		24.1523	25.288	24.5825	32.8988	33.0968	33.1951	32.9833	32.9648	32.1539		tr|A0A0D9RHM3|A0A0D9RHM3_CHLSB Uncharacterized protein OS=Chlorocebus sabaeus GN=XPO5 PE=3 SV=1;sp|Q9HAV4|XPO5_HUMAN Exportin-5 OS=Homo sapiens GN=XPO5 PE=1 SV=1
300	A0A0D9QWF7;Q86VP6;Q86VP6-2;A0A0C4DGH5	CAND1	Cullin-associated NEDD8-dissociated protein 1	78	62	75.4	136.37	1230	323.31		-2.30682	-1.97034	-0.336483		2.74905	2.36475	0.985574	+	+	+_+			58	59	57	62	59	60	18	18	18	148080000000		30.5784	30.4128	31.399	33.2328	33.0583	33.0196	32.9384	32.8862	32.4766		tr|A0A0D9QWF7|A0A0D9QWF7_CHLSB Uncharacterized protein OS=Chlorocebus sabaeus GN=CAND1 PE=4 SV=1;sp|Q86VP6|CAND1_HUMAN Cullin-associated NEDD8-dissociated protein 1 OS=Homo sapiens GN=CAND1 PE=1 SV=2;sp|Q86VP6-2|CAND1_HUMAN Isoform 2 of Cullin-associated N
2661	A0A0D9RY60;O00410;O00410-3;H0Y8C6;O00410-2	IPO5	Importin-5	65	52	75.9	123.64	1097	323.31		-3.64607	-3.06543	-0.580645		4.62245	3.95097	1.27428	+	+	+_+			50	50	49	46	50	52	22	19	21	146100000000		29.2347	29.5296	29.1963	33.082	32.7167	33.1001	32.473	32.6327	32.0512		tr|A0A0D9RY60|A0A0D9RY60_CHLSB Uncharacterized protein OS=Chlorocebus sabaeus GN=IPO5 PE=4 SV=1;sp|O00410|IPO5_HUMAN Importin-5 OS=Homo sapiens GN=IPO5 PE=1 SV=4;sp|O00410-3|IPO5_HUMAN Isoform 3 of Importin-5 OS=Homo sapiens GN=IPO5;tr|H0Y8C6|H0Y8C6_HUMAN
2210	A0A0D9RQR8	PRKDC	Uncharacterized protein	301	70	68.5	469.68	4131	323.31	2615	-6.70392	-6.44179	-0.262129		5.2197	4.19545	0.321141	+	+	+_+			61	64	63	60	62	65	11	11	11	142790000000		26.154	26.4747	25.8271	32.6752	33.0256	32.8668	32.9818	32.8385	31.961		tr|A0A0D9RQR8|A0A0D9RQR8_CHLSB Uncharacterized protein OS=Chlorocebus sabaeus GN=PRKDC PE=3 SV=1
1999	A0A0D9RMF3;P11021	HSPA5	78 kDa glucose-regulated protein	47	46	60.9	72.332	654	323.31		0.20194	0.483865	-0.281925		0.414457	0.776127	0.634692						38	40	37	39	42	41	36	42	43	141270000000		33.2512	33.3376	32.679	32.8556	32.9017	32.9047	32.7657	32.8419	32.2086		tr|A0A0D9RMF3|A0A0D9RMF3_CHLSB Uncharacterized protein OS=Chlorocebus sabaeus GN=HSPA5 PE=3 SV=1;sp|P11021|GRP78_HUMAN 78 kDa glucose-regulated protein OS=Homo sapiens GN=HSPA5 PE=1 SV=2
2229	A0A0D9RR42;P55060;P55060-3;P55060-4	CSE1L	Exportin-2	59	59	63.6	110.42	971	323.31		-4.36009	-3.78381	-0.576281		4.26766	3.61692	1.40468	+	+	+_+			54	55	55	53	57	56	24	17	20	133010000000		28.0807	28.5863	28.8998	32.9073	32.9093	32.8305	32.4404	32.5456	31.9321		tr|A0A0D9RR42|A0A0D9RR42_CHLSB Uncharacterized protein OS=Chlorocebus sabaeus GN=CSE1L PE=4 SV=1;sp|P55060|XPO2_HUMAN Exportin-2 OS=Homo sapiens GN=CSE1L PE=1 SV=3;sp|P55060-3|XPO2_HUMAN Isoform 3 of Exportin-2 OS=Homo sapiens GN=CSE1L;sp|P55060-4|XPO2_HUM
4252	Q99623;J3KPX7;F5GY37;Q99623-2;A0A0D9RCP4;F5GWA7;F5H3X6	PHB2	Prohibitin-2	26	26	85.3	33.296	299	323.31		-3.23199	-2.83211	-0.399877		3.42894	2.5231	0.533116	+	+	+_+			23	25	23	24	25	24	17	16	16	129290000000		29.1901	29.3621	30.135	32.7918	32.8098	32.7815	32.6261	32.8148	31.7426		sp|Q99623|PHB2_HUMAN Prohibitin-2 OS=Homo sapiens GN=PHB2 PE=1 SV=2;tr|J3KPX7|J3KPX7_HUMAN Prohibitin-2 OS=Homo sapiens GN=PHB2 PE=1 SV=2;tr|F5GY37|F5GY37_HUMAN Prohibitin-2 OS=Homo sapiens GN=PHB2 PE=1 SV=1;sp|Q99623-2|PHB2_HUMAN Isoform 2 of Prohibitin-2
3005	A0A0D9S9R0;A0A0D9S405;P35232;C9JW96;E7ESE2;E9PCW0;C9JZ20;P35232-2	PHB	Prohibitin	28	28	93	29.673	271	323.31		-2.72622	-2.40006	-0.326159		3.16467	2.70748	0.330382	+	+	+_+			26	26	26	28	28	24	12	10	11	120640000000		29.9677	29.6791	30.0739	32.1123	32.8528	32.9344	32.6754	32.5573	31.6883		tr|A0A0D9S9R0|A0A0D9S9R0_CHLSB Uncharacterized protein OS=Chlorocebus sabaeus PE=4 SV=1;tr|A0A0D9S405|A0A0D9S405_CHLSB Uncharacterized protein OS=Chlorocebus sabaeus PE=4 SV=1;sp|P35232|PHB_HUMAN Prohibitin OS=Homo sapiens GN=PHB PE=1 SV=1;tr|C9JW96|C9JW96
2977	A0A0D9S3K2;Q14974;Q14974-2;J3KTM9	KPNB1	Importin subunit beta-1	59	59	70.2	97.169	876	323.31		-4.63342	-4.01881	-0.614618		5.50078	4.44936	1.72626	+	+	+_+			53	56	51	53	54	55	18	13	13	117140000000		28.1282	27.8427	28.2518	32.6867	32.6683	32.768	32.191	32.3042	31.7839		tr|A0A0D9S3K2|A0A0D9S3K2_CHLSB Uncharacterized protein OS=Chlorocebus sabaeus GN=KPNB1 PE=4 SV=1;sp|Q14974|IMB1_HUMAN Importin subunit beta-1 OS=Homo sapiens GN=KPNB1 PE=1 SV=2;sp|Q14974-2|IMB1_HUMAN Isoform 2 of Importin subunit beta-1 OS=Homo sapiens GN=
3011	A0A0D9S441;P11142;E9PKE3;E9PNE6;P11142-2;A8K7Q2;E9PN89	HSPA8	Heat shock cognate 71 kDa protein	42	26	71.8	70.897	646	323.31		-0.265044	0.0139109	-0.278955		0.623225	0.0268603	0.669955						21	24	21	23	25	24	22	22	22	115370000000		32.2481	32.2545	31.8773	32.2289	32.2651	32.6811	32.1959	32.268	31.8743		tr|A0A0D9S441|A0A0D9S441_CHLSB Uncharacterized protein OS=Chlorocebus sabaeus GN=HSPA8 PE=3 SV=1;sp|P11142|HSP7C_HUMAN Heat shock cognate 71 kDa protein OS=Homo sapiens GN=HSPA8 PE=1 SV=1;tr|E9PKE3|E9PKE3_HUMAN Heat shock cognate 71 kDa protein OS=Homo sap
1823	A0A0D9RJU1;P08670;B0YJC4;P20152	VIM;Vim	Vimentin	63	55	89.1	53.708	466	323.31		0.747866	-1.59396	2.34183		0.652969	0.198676	0.309996						55	14	12	16	21	19	16	21	12	109600000000		27.8749	26.5442	27.276	26.3009	25.9958	27.1549	25.7898	25.7351	34.9522		tr|A0A0D9RJU1|A0A0D9RJU1_CHLSB Uncharacterized protein OS=Chlorocebus sabaeus GN=VIM PE=3 SV=1;sp|P08670|VIME_HUMAN Vimentin OS=Homo sapiens GN=VIM PE=1 SV=4;tr|B0YJC4|B0YJC4_HUMAN Vimentin OS=Homo sapiens GN=VIM PE=1 SV=1;sp|P20152|VIME_MOUSE Vimentin OS=
323	A0A0D9QWT3;O95373	IPO7	Importin-7	59	58	61.4	119.52	1038	323.31		-5.21329	-4.81622	-0.397069		5.30894	5.03194	1.24646	+	+	+_+			50	52	51	49	53	56	10	7	9	99323000000		26.9904	27.0578	27.3947	32.5228	32.1939	32.3661	31.9948	32.1467	31.7501		tr|A0A0D9QWT3|A0A0D9QWT3_CHLSB Uncharacterized protein OS=Chlorocebus sabaeus GN=IPO7 PE=4 SV=1;sp|O95373|IPO7_HUMAN Importin-7 OS=Homo sapiens GN=IPO7 PE=1 SV=1
1881	A0A0D9RKP7	LRPPRC	Uncharacterized protein	101	63	72.1	158.62	1398	323.31		-5.57256	-5.49869	-0.0738691		5.54183	6.10796	0.220604	+	+	+_+			57	58	60	59	62	62	11	12	12	96199000000		26.7666	26.7156	26.4815	32.462	32.0986	32.1208	32.1337	32.2597	32.0664		tr|A0A0D9RKP7|A0A0D9RKP7_CHLSB Uncharacterized protein OS=Chlorocebus sabaeus GN=LRPPRC PE=4 SV=1
2576	A0A0D9RWS6;P49792	RANBP2	E3 SUMO-protein ligase RanBP2	178	177	61.7	360.61	3247	323.31		-8.28301	-7.96153	-0.321483		4.17241	3.94602	0.408392	+	+	+_+			140	160	158	143	149	150	3	5	5	90609000000		23.5797	23.5426	24.9024	31.9656	32.5854	32.3228	32.2892	32.2122	31.408		tr|A0A0D9RWS6|A0A0D9RWS6_CHLSB Uncharacterized protein OS=Chlorocebus sabaeus GN=RANBP2 PE=4 SV=1;sp|P49792|RBP2_HUMAN E3 SUMO-protein ligase RanBP2 OS=Homo sapiens GN=RANBP2 PE=1 SV=2
2069	A0A0D9RNJ1;P68104;Q5VTE0;A0A087WVQ9;P68104-2;A0A087WV01	EEF1A1;EEF1A1P5	Elongation factor 1-alpha 1;Putative elongation factor 1-alpha-like 3;Elongation factor 1-alpha	35	12	77.7	50.14	462	323.31		0.617956	1.03706	-0.4191		0.658848	1.39413	0.505519						11	11	11	11	11	12	10	12	12	87791000000		32.5678	32.8088	31.8413	31.2296	31.8359	32.2986	31.5278	31.5867	30.9923		tr|A0A0D9RNJ1|A0A0D9RNJ1_CHLSB Elongation factor 1-alpha OS=Chlorocebus sabaeus PE=3 SV=1;sp|P68104|EF1A1_HUMAN Elongation factor 1-alpha 1 OS=Homo sapiens GN=EEF1A1 PE=1 SV=1;sp|Q5VTE0|EF1A3_HUMAN Putative elongation factor 1-alpha-like 3 OS=Homo sapiens
2743	A0A0D9RZE8;P25705;P25705-2;P25705-3;K7EK77	ATP5A1	ATP synthase subunit alpha, mitochondrial	29	29	54.2	59.745	553	323.31		-1.2817	-0.766249	-0.51545		2.58883	1.59173	2.01679	+					24	26	25	28	28	25	22	21	20	84851000000		30.6707	30.801	31.2981	32.1987	32.2126	32.2036	31.4815	31.8589	31.7282		tr|A0A0D9RZE8|A0A0D9RZE8_CHLSB ATP synthase subunit alpha OS=Chlorocebus sabaeus GN=ATP5A1 PE=3 SV=1;sp|P25705|ATPA_HUMAN ATP synthase subunit alpha, mitochondrial OS=Homo sapiens GN=ATP5A1 PE=1 SV=1;sp|P25705-2|ATPA_HUMAN Isoform 2 of ATP synthase subunit
1158	A0A0D9R952;E5KLJ6;E5KLJ5;O60313;O60313-2;E5KLK1;E5KLJ9	OPA1	Dynamin-like 120 kDa protein, mitochondrial;Dynamin-like 120 kDa protein, form S1	70	70	66.5	115.86	997	323.31		0.343028	0.416508	-0.07348		2.3008	1.52384	0.264692						58	63	61	56	60	61	48	46	51	75682000000		31.9119	32.1202	31.9887	31.6785	31.6535	31.6597	31.7555	31.6354	31.3804		tr|A0A0D9R952|A0A0D9R952_CHLSB Uncharacterized protein OS=Chlorocebus sabaeus GN=OPA1 PE=3 SV=1;tr|E5KLJ6|E5KLJ6_HUMAN Dynamin-like 120 kDa protein, mitochondrial OS=Homo sapiens GN=OPA1 PE=1 SV=1;tr|E5KLJ5|E5KLJ5_HUMAN Dynamin-like 120 kDa protein, mitoch
3427	A0A0D9SD09	HIST1H4A	Histone H4	20	20	65	11.367	103	136.76		0.534798	-1.47171	2.00651		0.425498	0.26743	0.396032						20	10	10	9	9	10	9	13	10	74213000000		29.5818	27.7913	28.4662	27.8666	28.2974	28.0709	28.1607	27.7406	34.353		tr|A0A0D9SD09|A0A0D9SD09_CHLSB Histone H4 OS=Chlorocebus sabaeus
2165	A0A0D9RQ38;O14980	XPO1	Exportin-1	57	57	62.9	123.38	1071	323.31		-4.97365	-4.67794	-0.295712		4.29737	3.85648	0.523252	+	+	+_+			51	51	53	50	54	56	16	13	13	73819000000		26.5189	26.8498	27.3536	31.6605	31.9279	32.0549	31.6598	31.923	31.1734		tr|A0A0D9RQ38|A0A0D9RQ38_CHLSB Uncharacterized protein OS=Chlorocebus sabaeus GN=XPO1 PE=3 SV=1;sp|O14980|XPO1_HUMAN Exportin-1 OS=Homo sapiens GN=XPO1 PE=1 SV=1
2577	A0A0D9RWS9;H0YLE8	IQGAP1	Uncharacterized protein	154	13	80.5	189.15	1657	323.31		-7.57437	-7.27172	-0.302651		3.99773	3.63432	0.332911	+	+	+_+			13	13	13	13	13	13	4	4	4	72011000000		23.8686	24.9742	23.4046	31.3651	31.8175	31.7878	31.8324	31.5461	30.684		tr|A0A0D9RWS9|A0A0D9RWS9_CHLSB Uncharacterized protein OS=Chlorocebus sabaeus GN=IQGAP1 PE=4 SV=1;tr|H0YLE8|H0YLE8_HUMAN Ras GTPase-activating-like protein IQGAP1 OS=Homo sapiens GN=IQGAP1 PE=1 SV=1
1776	A0A0D9RJ20;P08238	HSP90AB1	Heat shock protein HSP 90-beta	51	29	64.6	83.236	724	323.31		-1.49567	-1.27605	-0.219622		3.92563	2.10443	0.386479	+					27	25	27	26	29	26	15	16	14	69978000000		30.1133	30.2867	30.4578	31.7883	31.7537	31.8028	31.6588	31.9187	31.1084		tr|A0A0D9RJ20|A0A0D9RJ20_CHLSB Uncharacterized protein OS=Chlorocebus sabaeus GN=HSP90AB1 PE=3 SV=1;sp|P08238|HS90B_HUMAN Heat shock protein HSP 90-beta OS=Homo sapiens GN=HSP90AB1 PE=1 SV=4
3216	A0A0D9S7M1;P17812;P17812-2	CTPS1	CTP synthase 1	47	44	77.5	66.764	591	323.31		1.7034	1.44938	0.254021		3.71119	4.01703	0.741615	+	+	+_+			38	38	40	37	38	37	40	35	39	68544000000		32.7489	32.8048	32.7512	31.2984	31.0411	30.8553	31.4795	31.311	31.1663		tr|A0A0D9S7M1|A0A0D9S7M1_CHLSB CTP synthase OS=Chlorocebus sabaeus GN=CTPS1 PE=3 SV=1;sp|P17812|PYRG1_HUMAN CTP synthase 1 OS=Homo sapiens GN=CTPS1 PE=1 SV=2;sp|P17812-2|PYRG1_HUMAN Isoform 2 of CTP synthase 1 OS=Homo sapiens GN=CTPS1
484	A0A0D9QZD3;Q96AG4	LRRC59	Leucine-rich repeat-containing protein 59	17	17	47.9	34.958	307	323.31		-2.80796	-2.52389	-0.284063		2.91172	3.07801	0.266375	+	+	+_+			17	16	16	17	17	15	11	12	10	68119000000		28.9218	29.1668	28.8956	31.1791	31.9123	32.3167	31.7592	31.8093	30.9873		tr|A0A0D9QZD3|A0A0D9QZD3_CHLSB Uncharacterized protein OS=Chlorocebus sabaeus GN=LRRC59 PE=4 SV=1;sp|Q96AG4|LRC59_HUMAN Leucine-rich repeat-containing protein 59 OS=Homo sapiens GN=LRRC59 PE=1 SV=1
2066	A0A0D9RNH9;Q96P70	IPO9	Importin-9	40	40	50.3	115.96	1041	323.31		-5.4171	-4.87476	-0.542339		4.7865	4.36097	1.11963	+	+	+_+			36	38	34	34	32	40	9	6	6	68037000000		26.3581	26.4131	26.9092	32.2355	31.7852	31.9111	31.6745	31.5573	31.073		tr|A0A0D9RNH9|A0A0D9RNH9_CHLSB Uncharacterized protein OS=Chlorocebus sabaeus GN=IPO9 PE=4 SV=1;sp|Q96P70|IPO9_HUMAN Importin-9 OS=Homo sapiens GN=IPO9 PE=1 SV=3
1516	A0A0D9RF48;P14174	MIF	Macrophage migration inhibitory factor	7	7	52.2	12.476	115	28.941		1.62907	1.55988	0.0691935		2.10551	1.86722	0.0777183	+					4	3	3	3	4	4	7	5	7	67625000000		32.07	32.3599	32.9911	31.2175	30.686	30.6303	31.3431	30.9264	30.4719		tr|A0A0D9RF48|A0A0D9RF48_CHLSB Uncharacterized protein OS=Chlorocebus sabaeus GN=MIF PE=4 SV=1;sp|P14174|MIF_HUMAN Macrophage migration inhibitory factor OS=Homo sapiens GN=MIF PE=1 SV=4
1040	Q5JP53;A0A0D9R7E7;P07437;Q5ST81	TUBB	Tubulin beta chain	34	5	75.8	47.766	426	221.76		-0.558761	-0.0161915	-0.542569		0.790255	0.016162	1.33555						5	5	5	5	5	5	4	4	4	63601000000		31.1595	31.5115	30.4865	31.5361	31.4387	31.859	31.1202	31.2838	30.8022		tr|Q5JP53|Q5JP53_HUMAN Tubulin beta chain OS=Homo sapiens GN=TUBB PE=1 SV=1;tr|A0A0D9R7E7|A0A0D9R7E7_CHLSB Tubulin beta chain OS=Chlorocebus sabaeus GN=TUBB PE=3 SV=1;sp|P07437|TBB5_HUMAN Tubulin beta chain OS=Homo sapiens GN=TUBB PE=1 SV=2;tr|Q5ST81|Q5ST8
407	A0A0D9QYB1;P06576;H0YH81;F8W079	ATP5B	ATP synthase subunit beta, mitochondrial;ATP synthase subunit beta	30	29	74.9	56.404	529	323.31		-1.58431	-1.03708	-0.547234		2.52297	1.82579	2.1895	+					25	26	26	28	27	28	23	20	21	61536000000		29.8648	29.8146	30.5539	31.5566	31.6617	31.7679	30.9921	31.2792	31.0732		tr|A0A0D9QYB1|A0A0D9QYB1_CHLSB ATP synthase subunit beta OS=Chlorocebus sabaeus GN=ATP5B PE=3 SV=1;sp|P06576|ATPB_HUMAN ATP synthase subunit beta, mitochondrial OS=Homo sapiens GN=ATP5B PE=1 SV=3;tr|H0YH81|H0YH81_HUMAN ATP synthase subunit beta, mitochondr
2082	A0A0D9RNT7;P62979;DOK006;J3QS39;J3QTR3;F5H6Q2;A0A0D9QZ56;F5GYU3;F5H2Z3;F5H265;B4DV12;A0A0D9R8X7;F5H388;F5H747;F5GXK7;J3QKN0;A0A0D9S5B0;Q5PY61;Q96C32;P62987;P0CG47;P0CG48;MAG002;KAM003;LOB005;LOB004;A0A0D9S9N6;M0R1V7;P0CG78;M0R1M6;M0R2S1;J3QSA3;F5GZ39	RPS27A;UBB;UBC;UBA52	Ubiquitin-40S ribosomal protein S27a;Ubiquitin;40S ribosomal protein S27a;Ubiquitin-60S ribosomal protein L40;Ubiquitin;60S ribosomal protein L40;Polyubiquitin-B;Ubiquitin;Polyubiquitin-C;Ubiquitin	10	10	54.5	17.965	156	229.26		-0.918871	-1.34005	0.421178		1.25872	1.96173	1.11271						10	10	9	9	10	9	6	7	7	60315000000		29.8963	29.7745	30.7161	31.362	31.0166	30.7648	31.5399	31.3961	31.4711		tr|A0A0D9RNT7|A0A0D9RNT7_CHLSB Uncharacterized protein OS=Chlorocebus sabaeus GN=RPS27A PE=4 SV=1;sp|P62979|RS27A_HUMAN Ubiquitin-40S ribosomal protein S27a OS=Homo sapiens GN=RPS27A PE=1 SV=2;in|DOK006|DOK006_R04 Ubiquitin, Related to project DOK_R04_1106
1533	A0A0D9RFC8;Q9BS26	ERP44	Endoplasmic reticulum resident protein 44	25	25	63.3	47.012	406	323.31		2.4264	2.69098	-0.26458		1.98037	1.83205	0.124971	+	+	+_+			16	20	22	23	21	19	21	22	23	56152000000		33.0645	33.4177	32.5963	29.6792	31.2835	30.8366	31.0134	30.874	29.1181		tr|A0A0D9RFC8|A0A0D9RFC8_CHLSB Uncharacterized protein OS=Chlorocebus sabaeus GN=ERP44 PE=4 SV=1;sp|Q9BS26|ERP44_HUMAN Endoplasmic reticulum resident protein 44 OS=Homo sapiens GN=ERP44 PE=1 SV=1
1974	E7ETZ4;A0A0D9RLZ6;Q9Y6E2;Q75MG1;B5MCH7;E7EMS9	BZW2	Basic leucine zipper and W2 domain-containing protein 2	33	32	65	46.913	408	314.73		-5.85419	-5.30618	-0.548017		4.0082	3.49972	0.840066	+	+	+_+			27	31	30	29	30	29	5	6	8	53901000000		25.5537	26.4035	25.1906	31.3759	31.5922	31.7423	31.2212	31.3822	30.4628		tr|E7ETZ4|E7ETZ4_HUMAN Basic leucine zipper and W2 domain-containing protein 2 (Fragment) OS=Homo sapiens GN=BZW2 PE=1 SV=1;tr|A0A0D9RLZ6|A0A0D9RLZ6_CHLSB Uncharacterized protein OS=Chlorocebus sabaeus GN=BZW2 PE=4 SV=1;sp|Q9Y6E2|BZW2_HUMAN Basic leucine z
959	A0A0D9R642;Q2TB90;Q2TB90-2;Q2TB90-3	HKDC1	Putative hexokinase HKDC1	55	51	63.4	102.53	917	323.31		-1.23387	-1.08189	-0.151983		2.5849	2.58197	0.780898						44	47	46	47	44	49	27	25	32	53473000000		30.0287	30.4202	29.8777	31.4453	31.4173	31.1655	31.2116	31.1708	31.1898		tr|A0A0D9R642|A0A0D9R642_CHLSB Uncharacterized protein OS=Chlorocebus sabaeus GN=HKDC1 PE=3 SV=1;sp|Q2TB90|HKDC1_HUMAN Putative hexokinase HKDC1 OS=Homo sapiens GN=HKDC1 PE=1 SV=3;sp|Q2TB90-2|HKDC1_HUMAN Isoform 2 of Putative hexokinase HKDC1 OS=Homo sapie
3896	P31689;P31689-2;A0A0D9RBZ5	DNAJA1	DnaJ homolog subfamily A member 1	26	26	70.8	44.868	397	323.31		-1.36454	-0.979548	-0.384994		1.63659	0.801453	0.2648						22	22	22	21	24	21	12	15	16	53213000000		30.0401	30.3037	29.4509	30.7265	31.5493	31.6125	31.4173	31.4161	29.9		sp|P31689|DNJA1_HUMAN DnaJ homolog subfamily A member 1 OS=Homo sapiens GN=DNAJA1 PE=1 SV=2;sp|P31689-2|DNJA1_HUMAN Isoform 2 of DnaJ homolog subfamily A member 1 OS=Homo sapiens GN=DNAJA1;tr|A0A0D9RBZ5|A0A0D9RBZ5_CHLSB Uncharacterized protein OS=Chloroceb
3518	B5MDF5;P62826;J3KQE5;F5H018;A0A0D9S5I4;H0YFC6	RAN	GTP-binding nuclear protein Ran	17	17	49.8	26.224	233	323.31		-2.79693	-2.53374	-0.26319		3.4776	2.89218	0.386618	+	+	+_+			17	17	16	16	17	17	10	9	8	49467000000		28.2194	28.5713	28.8953	31.6513	31.1832	31.2423	31.206	31.4559	30.6253		tr|B5MDF5|B5MDF5_HUMAN GTP-binding nuclear protein Ran OS=Homo sapiens GN=RAN PE=1 SV=1;sp|P62826|RAN_HUMAN GTP-binding nuclear protein Ran OS=Homo sapiens GN=RAN PE=1 SV=3;tr|J3KQE5|J3KQE5_HUMAN GTP-binding nuclear protein Ran (Fragment) OS=Homo sapiens G
1490	A0A0D9REP7;P13639	EEF2	Elongation factor 2	57	56	70.4	95.323	858	323.31		1.20015	1.11755	0.0826022		3.49608	3.22674	0.32865	+					47	48	47	47	45	47	42	42	44	48454000000		31.9965	31.9525	31.7365	30.826	30.6217	30.6374	30.7596	30.6492	30.9242		tr|A0A0D9REP7|A0A0D9REP7_CHLSB Uncharacterized protein OS=Chlorocebus sabaeus GN=EEF2 PE=4 SV=1;sp|P13639|EF2_HUMAN Elongation factor 2 OS=Homo sapiens GN=EEF2 PE=1 SV=4
2808	A0A0D9S0H6;P05141	SLC25A5	ADP/ATP translocase 2;ADP/ATP translocase 2, N-terminally processed	33	13	69.8	32.895	298	323.31		-0.546906	-0.957411	0.410506		1.65115	1.42106	0.60367						12	11	11	11	12	12	10	10	11	47976000000		30.3664	30.4114	30.0338	30.9413	30.8755	30.6356	31.4237	31.6031	30.657		tr|A0A0D9S0H6|A0A0D9S0H6_CHLSB Uncharacterized protein OS=Chlorocebus sabaeus GN=SLC25A5 PE=3 SV=1;sp|P05141|ADT2_HUMAN ADP/ATP translocase 2 OS=Homo sapiens GN=SLC25A5 PE=1 SV=7
50	A0A087WVQ6;Q00610-2;Q00610;A0A0D9R0N5	CLTC	Clathrin heavy chain;Clathrin heavy chain 1	87	74	60	192.06	1679	323.31		-1.0201	-1.19673	0.176631		1.05098	1.68539	0.186128						65	64	66	60	64	68	43	33	35	46565000000		29.4652	29.7745	30.4808	31.6013	30.6982	30.4813	31.1583	30.8793	31.273		tr|A0A087WVQ6|A0A087WVQ6_HUMAN Clathrin heavy chain OS=Homo sapiens GN=CLTC PE=1 SV=1;sp|Q00610-2|CLH1_HUMAN Isoform 2 of Clathrin heavy chain 1 OS=Homo sapiens GN=CLTC;sp|Q00610|CLH1_HUMAN Clathrin heavy chain 1 OS=Homo sapiens GN=CLTC PE=1 SV=5;tr|A0A0D9
2922	A0A0D9S2I7;Q07065	CKAP4	Cytoskeleton-associated protein 4	44	44	73.7	65.632	598	323.31		-2.57323	-2.56077	-0.0124658		4.11595	3.58049	0.0223848	+	+	+_+			37	38	39	39	42	40	17	13	16	46306000000		28.4088	28.4226	28.8052	30.9518	31.2193	31.1852	31.2642	31.28	30.7748		tr|A0A0D9S2I7|A0A0D9S2I7_CHLSB Uncharacterized protein OS=Chlorocebus sabaeus GN=CKAP4 PE=4 SV=1;sp|Q07065|CKAP4_HUMAN Cytoskeleton-associated protein 4 OS=Homo sapiens GN=CKAP4 PE=1 SV=2
1508	A0A0D9REY7;Q7L1Q6;Q7L1Q6-4;Q7L1Q6-3;Q7L1Q6-2;C9IZ80;C9JFN4	BZW1	Basic leucine zipper and W2 domain-containing protein 1	29	28	68.5	48.073	419	168.54		-6.78323	-6.19084	-0.592392		3.58808	2.91465	0.422385	+	+	+_+			23	27	25	26	26	26	5	5	2	45962000000		24.9693	23.5286	25.1434	31.1187	31.1097	31.7626	31.0013	31.545	29.6674		tr|A0A0D9REY7|A0A0D9REY7_CHLSB Uncharacterized protein OS=Chlorocebus sabaeus GN=BZW1 PE=4 SV=1;sp|Q7L1Q6|BZW1_HUMAN Basic leucine zipper and W2 domain-containing protein 1 OS=Homo sapiens GN=BZW1 PE=1 SV=1;sp|Q7L1Q6-4|BZW1_HUMAN Isoform 4 of Basic leucine
2339	A0A0D9RSW2;Q92973-2;Q92973;Q92973-3	TNPO1	Transportin-1	49	37	69.9	102.37	898	323.31		-5.87531	-5.44401	-0.431306		5.73792	4.94205	0.867367	+	+	+_+			31	34	33	31	35	35	5	4	5	40703000000		25.3315	25.1575	25.1593	31.3239	30.893	31.0574	30.7208	30.9622	30.2973		tr|A0A0D9RSW2|A0A0D9RSW2_CHLSB Uncharacterized protein OS=Chlorocebus sabaeus GN=TNPO1 PE=4 SV=1;sp|Q92973-2|TNPO1_HUMAN Isoform 2 of Transportin-1 OS=Homo sapiens GN=TNPO1;sp|Q92973|TNPO1_HUMAN Transportin-1 OS=Homo sapiens GN=TNPO1 PE=1 SV=2;sp|Q92973-3|
3132	A0A0D9S647;P05023-4;P05023;P05023-3;P05023-2	ATP1A1	Sodium/potassium-transporting ATPase subunit alpha-1	46	38	46.3	112.91	1023	323.31		-1.96804	-1.72534	-0.242702		4.43406	3.34488	0.799936	+	+	+_+			31	32	33	31	33	35	20	22	23	40251000000		28.9639	28.9654	29.2381	31.0599	31.0617	30.95	30.9896	30.8263	30.5276		tr|A0A0D9S647|A0A0D9S647_CHLSB Sodium/potassium-transporting ATPase subunit alpha OS=Chlorocebus sabaeus GN=ATP1A1 PE=3 SV=1;sp|P05023-4|AT1A1_HUMAN Isoform 4 of Sodium/potassium-transporting ATPase subunit alpha-1 OS=Homo sapiens GN=ATP1A1;sp|P05023|AT1A1
2308	A0A0D9RSF5	MIPOL1	Uncharacterized protein	1	1	2.3	51.507	442	1.8263		0.350442	0.743813	-0.393371		0.236302	0.588394	0.685926						1	1	1	1	1	1	1	1	1	38671000000		30.675	30.5905	32.2616	30.4193	30.9236	31.1328	30.4316	30.6959	30.1681		tr|A0A0D9RSF5|A0A0D9RSF5_CHLSB Uncharacterized protein OS=Chlorocebus sabaeus GN=MIPOL1 PE=4 SV=1
3105	R4GN98;A0A0D9S5P1;P06703	S100A6	Protein S100;Protein S100-A6	5	5	49.4	9.681	85	27.68		-2.72529	-1.92521	-0.800081		3.16834	2.71843	1.74587	+	+	+_+			4	4	5	5	5	5	3	4	4	37595000000		28.1428	28.2533	28.8936	31.262	31.3716	30.832	30.1688	30.592	30.3045		tr|R4GN98|R4GN98_HUMAN Protein S100 (Fragment) OS=Homo sapiens GN=S100A6 PE=1 SV=1;tr|A0A0D9S5P1|A0A0D9S5P1_CHLSB Protein S100 OS=Chlorocebus sabaeus GN=S100A6 PE=3 SV=1;sp|P06703|S10A6_HUMAN Protein S100-A6 OS=Homo sapiens GN=S100A6 PE=1 SV=1
511	A0A0D9QZR7;O60884;A0A0D9SC95	DNAJA2	DnaJ homolog subfamily A member 2	27	27	63.8	45.745	412	323.31		-1.27254	-1.195	-0.0775452		1.61729	1.21888	0.0735169						26	26	27	23	25	25	9	13	14	36282000000		29.45	29.7989	28.7131	30.2822	30.6533	30.8441	30.9039	30.7865	29.8566		tr|A0A0D9QZR7|A0A0D9QZR7_CHLSB Uncharacterized protein OS=Chlorocebus sabaeus PE=3 SV=1;sp|O60884|DNJA2_HUMAN DnaJ homolog subfamily A member 2 OS=Homo sapiens GN=DNAJA2 PE=1 SV=1;tr|A0A0D9SC95|A0A0D9SC95_CHLSB Uncharacterized protein OS=Chlorocebus sabaeu
3878	P27348;E9PG15	YWHAQ	14-3-3 protein theta	17	12	59.2	27.764	245	323.31		-1.30151	-1.44966	0.14815		1.58526	3.48381	0.146983		+				11	11	10	9	10	10	9	9	7	33856000000		29.0747	29.3637	29.3456	31.2779	30.3338	30.0767	30.8142	30.5427	30.776		sp|P27348|1433T_HUMAN 14-3-3 protein theta OS=Homo sapiens GN=YWHAQ PE=1 SV=1;tr|E9PG15|E9PG15_HUMAN 14-3-3 protein theta (Fragment) OS=Homo sapiens GN=YWHAQ PE=1 SV=1
3143	A0A0D9S6F5;Q9UHI6	DDX20	Probable ATP-dependent RNA helicase DDX20	33	33	53.6	92.558	827	323.31		-9.27026	-8.80145	-0.468812		5.02946	4.04329	0.330814	+	+	+_+			26	32	29	30	29	30	2	3	3	33829000000		21.7727	21.7675	21.2015	30.3158	31.1433	31.0933	30.9523	30.8471	29.3467		tr|A0A0D9S6F5|A0A0D9S6F5_CHLSB Uncharacterized protein OS=Chlorocebus sabaeus GN=DDX20 PE=4 SV=1;sp|Q9UHI6|DDX20_HUMAN Probable ATP-dependent RNA helicase DDX20 OS=Homo sapiens GN=DDX20 PE=1 SV=2
2103	A0A0D9RP55;I3L2C7;P57678	GEMIN4	Gem-associated protein 4	49	49	52.9	120.36	1058	323.31		-7.26869	-6.9887	-0.279988		4.1494	3.59586	0.199701	+	+	+_+			41	46	48	36	40	42	3	2	2	33800000000		24.0575	22.9301	23.3438	30.3838	31.2575	30.4962	30.1789	31.3341	29.7846		tr|A0A0D9RP55|A0A0D9RP55_CHLSB Uncharacterized protein OS=Chlorocebus sabaeus GN=GEMIN4 PE=4 SV=1;tr|I3L2C7|I3L2C7_HUMAN Gem-associated protein 4 OS=Homo sapiens GN=GEMIN4 PE=1 SV=1;sp|P57678|GEMI4_HUMAN Gem-associated protein 4 OS=Homo sapiens GN=GEMIN4 P
754	A0A0D9R370;Q60FE5;P21333-2;P21333;Q5HY54;A0A087WWY3	FLNA	Filamin-A	121	106	60.6	279.9	2639	323.31		1.66902	1.11165	0.557366		4.61959	2.48395	1.44347	+					82	72	76	70	63	74	89	85	85	33778000000		31.5181	31.6826	31.6317	30.0109	29.9856	29.8288	30.5399	30.1861	30.7714		tr|A0A0D9R370|A0A0D9R370_CHLSB Uncharacterized protein OS=Chlorocebus sabaeus GN=FLNA PE=4 SV=1;tr|Q60FE5|Q60FE5_HUMAN Filamin A OS=Homo sapiens GN=FLNA PE=1 SV=1;sp|P21333-2|FLNA_HUMAN Isoform 2 of Filamin-A OS=Homo sapiens GN=FLNA;sp|P21333|FLNA_HUMAN Fi
2169	A0A0D9RQ73;P50991;P50991-2	CCT4	T-complex protein 1 subunit delta	37	37	76.3	57.922	539	323.31		-1.16299	-0.799991	-0.362998		2.76448	1.45591	0.58479						32	34	33	32	34	33	24	21	22	32459000000		29.4832	29.4678	29.7139	30.7309	30.4798	30.9431	30.5269	30.6615	29.8764		tr|A0A0D9RQ73|A0A0D9RQ73_CHLSB T-complex protein 1 subunit delta OS=Chlorocebus sabaeus GN=CCT4 PE=3 SV=1;sp|P50991|TCPD_HUMAN T-complex protein 1 subunit delta OS=Homo sapiens GN=CCT4 PE=1 SV=4;sp|P50991-2|TCPD_HUMAN Isoform 2 of T-complex protein 1 subun
966	A0A0D9R678;P51648;P51648-2;J3QRD1	ALDH3A2	Fatty aldehyde dehydrogenase	28	27	48.9	54.652	485	323.31		-7.72072	-7.27832	-0.442397		5.05132	4.2739	0.661144	+	+	+_+			21	25	27	25	25	25	3	2	3	30672000000		23.3274	22.5044	23.2671	30.661	30.84	30.7601	30.8435	30.2802	29.8103		tr|A0A0D9R678|A0A0D9R678_CHLSB Aldehyde dehydrogenase OS=Chlorocebus sabaeus GN=ALDH3A2 PE=3 SV=1;sp|P51648|AL3A2_HUMAN Fatty aldehyde dehydrogenase OS=Homo sapiens GN=ALDH3A2 PE=1 SV=1;sp|P51648-2|AL3A2_HUMAN Isoform 2 of Fatty aldehyde dehydrogenase OS=H
1652	A0A0D9RH50	SLIRP	Uncharacterized protein	10	10	79.8	12.318	109	87.819	102	-3.92107	-3.96757	0.0464993		3.23833	3.20217	0.0694019	+	+	+_+			9	9	9	9	9	9	3	4	2	30276000000		27.3368	26.4256	26.1181	30.8224	30.3125	30.5088	30.6705	30.863	30.2497		tr|A0A0D9RH50|A0A0D9RH50_CHLSB Uncharacterized protein OS=Chlorocebus sabaeus GN=SLIRP PE=4 SV=1
1905	A0A0D9RKY9;P38646	HSPA9	Stress-70 protein, mitochondrial	42	41	61.7	73.597	679	282		0.664441	1.20383	-0.539384		0.518938	1.08794	0.70299						27	37	34	36	36	34	33	37	36	30203000000		31.2861	31.631	30.0444	29.7431	30.6171	30.6079	29.4088	30.0724	29.8688		tr|A0A0D9RKY9|A0A0D9RKY9_CHLSB Uncharacterized protein OS=Chlorocebus sabaeus GN=HSPA9 PE=3 SV=1;sp|P38646|GRP75_HUMAN Stress-70 protein, mitochondrial OS=Homo sapiens GN=HSPA9 PE=1 SV=2
1732	A0A0D9RIJ4;E9PD53;Q9NTJ3;Q9NTJ3-2	SMC4	Structural maintenance of chromosomes protein;Structural maintenance of chromosomes protein 4	67	67	51.5	147.06	1287	323.31		-5.40996	-4.99393	-0.41603		3.84063	3.22605	0.553204	+	+	+_+			47	53	58	58	60	55	12	9	12	29991000000		24.7698	26.0916	25.3852	30.8066	30.8397	30.8302	30.5676	30.8906	29.7703		tr|A0A0D9RIJ4|A0A0D9RIJ4_CHLSB Structural maintenance of chromosomes protein OS=Chlorocebus sabaeus GN=SMC4 PE=3 SV=1;tr|E9PD53|E9PD53_HUMAN Structural maintenance of chromosomes protein OS=Homo sapiens GN=SMC4 PE=1 SV=1;sp|Q9NTJ3|SMC4_HUMAN Structural mai
218	A0A0D9QV84;P50454;E9PPV6;E9PR70;E9PK86;E9PMI5	SERPINH1	Serpin H1	22	22	61.2	46.451	418	303.59		-0.0474262	-0.0628293	0.0154031		0.411825	0.124143	0.0280264						20	22	22	18	19	22	19	17	19	29520000000		30.179	30.2623	30.3011	30.3355	30.2292	30.3199	30.5874	30.375	29.9684		tr|A0A0D9QV84|A0A0D9QV84_CHLSB Uncharacterized protein OS=Chlorocebus sabaeus GN=SERPINH1 PE=3 SV=1;sp|P50454|SERPH_HUMAN Serpin H1 OS=Homo sapiens GN=SERPINH1 PE=1 SV=2;tr|E9PPV6|E9PPV6_HUMAN Serpin H1 OS=Homo sapiens GN=SERPINH1 PE=1 SV=1;tr|E9PR70|E9PR7
726	A0A0D9R2U5;P21359-2;P21359-6;P21359;H0Y465;J3KSB5;P21359-4	NF1	Neurofibromin;Neurofibromin truncated	103	103	45.5	320.51	2849	323.31		-5.81893	-5.73144	-0.087492		4.01733	3.28954	0.0600228	+	+	+_+			87	92	95	86	87	87	2	2	2	29123000000		24.443	25.2447	24.2128	30.8454	30.3082	30.2036	30.6249	31.0072	29.4627		tr|A0A0D9R2U5|A0A0D9R2U5_CHLSB Uncharacterized protein OS=Chlorocebus sabaeus GN=NF1 PE=4 SV=1;sp|P21359-2|NF1_HUMAN Isoform 1 of Neurofibromin OS=Homo sapiens GN=NF1;sp|P21359-6|NF1_HUMAN Isoform 6 of Neurofibromin OS=Homo sapiens GN=NF1;sp|P21359|NF1_HUM
1016	A0A0D9R732;O43615;M0QXU7	TIMM44	Mitochondrial import inner membrane translocase subunit TIM44	28	28	62.7	47.395	415	212.73		-1.87728	-1.5746	-0.302683		3.37582	2.28038	0.491522	+	+	+_+			19	27	25	23	23	25	12	14	13	28319000000		28.8579	28.7997	28.4098	30.3771	30.5915	30.7307	30.261	30.6944	29.8357		tr|A0A0D9R732|A0A0D9R732_CHLSB Mitochondrial import inner membrane translocase subunit TIM44 OS=Chlorocebus sabaeus GN=TIMM44 PE=3 SV=1;sp|O43615|TIM44_HUMAN Mitochondrial import inner membrane translocase subunit TIM44 OS=Homo sapiens GN=TIMM44 PE=1 SV=2;
3809	P04279;P04279-2	SEMG1	Semenogelin-1;Alpha-inhibin-92;Alpha-inhibin-31;Seminal basic protein	25	18	58.7	52.13	462	323.31		-3.2465	4.07853	-7.32503		0.282246	0.73176	0.878475						2	6	2	3	17	17	12	3	4	26070000000		22.4115	22.5389	30.0962	32.2866	20.5151	31.9844	20.4756	21.3617	20.9738		sp|P04279|SEMG1_HUMAN Semenogelin-1 OS=Homo sapiens GN=SEMG1 PE=1 SV=2;sp|P04279-2|SEMG1_HUMAN Isoform 2 of Semenogelin-1 OS=Homo sapiens GN=SEMG1
574	A0A0D9R0J7;P46060	RANGAP1	Ran GTPase-activating protein 1	32	32	65.5	63.32	586	323.31		-7.3344	-7.4218	0.0874062		3.14548	3.46436	0.0632279	+	+	+_+			26	32	30	29	29	28	2	2	1	25954000000		22.0998	NaN	22.5031	29.3516	30.742	30.686	30.4326	30.5649	30.0443		tr|A0A0D9R0J7|A0A0D9R0J7_CHLSB Uncharacterized protein OS=Chlorocebus sabaeus GN=RANGAP1 PE=4 SV=1;sp|P46060|RAGP1_HUMAN Ran GTPase-activating protein 1 OS=Homo sapiens GN=RANGAP1 PE=1 SV=1
1198	A0A0D9R9Y5;P50990;P50990-2;P50990-3	CCT8	T-complex protein 1 subunit theta	38	38	71.7	59.516	548	269.55		-1.06901	-0.793358	-0.275656		3.20181	1.61397	0.598981						32	30	28	32	35	33	28	25	25	25089000000		29.2892	29.0143	29.3381	30.3175	30.1953	30.3359	29.9548	30.379	29.688		tr|A0A0D9R9Y5|A0A0D9R9Y5_CHLSB Uncharacterized protein OS=Chlorocebus sabaeus GN=CCT8 PE=3 SV=1;sp|P50990|TCPQ_HUMAN T-complex protein 1 subunit theta OS=Homo sapiens GN=CCT8 PE=1 SV=4;sp|P50990-2|TCPQ_HUMAN Isoform 2 of T-complex protein 1 subunit theta O
3063	A0A0D9S4Z7;P50748	KNTC1	Kinetochore-associated protein 1	80	80	40.6	250.55	2205	323.31		-6.22889	-5.44985	-0.779039		2.6154	2.1326	0.574898	+	+	+_+			51	70	66	68	68	69	6	4	1	24987000000		25.1213	NaN	25.4111	30.4266	30.7888	30.5575	30.2513	30.5478	28.6365		tr|A0A0D9S4Z7|A0A0D9S4Z7_CHLSB Uncharacterized protein OS=Chlorocebus sabaeus GN=KNTC1 PE=4 SV=1;sp|P50748|KNTC1_HUMAN Kinetochore-associated protein 1 OS=Homo sapiens GN=KNTC1 PE=1 SV=1
3930	P45880-2;P45880;P45880-1;A0A0A0MR02;A0A0D9R9R9;Q5JSD2;Q5JSD1	VDAC2	Voltage-dependent anion-selective channel protein 2	13	13	57.6	30.412	283	323.31		-2.29909	-2.25307	-0.0460243		2.901	2.78902	0.122369	+	+	+_+			13	13	13	13	13	13	7	8	7	24768000000		27.4839	27.9451	28.432	30.3118	30.34	30.1065	30.3326	30.3127	29.975		sp|P45880-2|VDAC2_HUMAN Isoform 2 of Voltage-dependent anion-selective channel protein 2 OS=Homo sapiens GN=VDAC2;sp|P45880|VDAC2_HUMAN Voltage-dependent anion-selective channel protein 2 OS=Homo sapiens GN=VDAC2 PE=1 SV=2;sp|P45880-1|VDAC2_HUMAN Isoform 1
3820	P07355;P07355-2;A0A0D9RI07;H0YM50;H0YN42;H0YMD0;H0YMU9;A0A0D9SDK6	ANXA2	Annexin A2;Annexin	38	16	82	38.604	339	323.31		1.8156	1.69135	0.124252		3.26234	3.66215	0.24082	+	+	+_+			15	14	13	13	14	14	14	15	15	24540000000		31.3612	31.501	31.5875	29.6083	29.9833	29.4113	29.9712	29.5773	29.8271		sp|P07355|ANXA2_HUMAN Annexin A2 OS=Homo sapiens GN=ANXA2 PE=1 SV=2;sp|P07355-2|ANXA2_HUMAN Isoform 2 of Annexin A2 OS=Homo sapiens GN=ANXA2;tr|A0A0D9RI07|A0A0D9RI07_CHLSB Annexin OS=Chlorocebus sabaeus PE=3 SV=1;tr|H0YM50|H0YM50_HUMAN Annexin (Fragment) O
984	A0A0D9R6I9;Q9HBH5	RDH14	Retinol dehydrogenase 14	4	3	14	36.589	336	6.2456		-7.99576	-6.98098	-1.01478		5.59029	2.79859	0.488707	+	+	+_+			3	2	3	2	2	2	0	0	0	24352000000		NaN	NaN	NaN	30.6891	30.5399	30.3366	29.9252	30.8115	27.7846		tr|A0A0D9R6I9|A0A0D9R6I9_CHLSB Uncharacterized protein OS=Chlorocebus sabaeus GN=RDH14 PE=3 SV=1;sp|Q9HBH5|RDH14_HUMAN Retinol dehydrogenase 14 OS=Homo sapiens GN=RDH14 PE=1 SV=1
3293	A0A0D9S8M7;P42345	MTOR	Serine/threonine-protein kinase mTOR	89	89	46.6	288.95	2549	323.31		-5.48755	-5.3928	-0.0947545		1.93013	1.91953	0.192176	+	+	+_+			70	77	77	74	75	78	4	2	6	24153000000		NaN	23.5192	27.2727	30.0785	30.6561	30.1363	30.275	30.1209	30.1907		tr|A0A0D9S8M7|A0A0D9S8M7_CHLSB Uncharacterized protein OS=Chlorocebus sabaeus GN=MTOR PE=3 SV=1;sp|P42345|MTOR_HUMAN Serine/threonine-protein kinase mTOR OS=Homo sapiens GN=MTOR PE=1 SV=1
3103	A0A0D9S5N7;P29034;R4GN49	S100A2	Protein S100-A2	7	6	44.9	11.135	98	32.768		-2.2206	-1.9415	-0.279102		2.43366	2.21284	0.310442	+	+	+_+			5	5	5	6	6	6	2	4	3	24014000000		28.4182	27.573	28.247	29.8579	30.2907	30.7514	29.5307	30.4213	30.1106		tr|A0A0D9S5N7|A0A0D9S5N7_CHLSB Protein S100 OS=Chlorocebus sabaeus GN=S100A2 PE=3 SV=1;sp|P29034|S10A2_HUMAN Protein S100-A2 OS=Homo sapiens GN=S100A2 PE=1 SV=3;tr|R4GN49|R4GN49_HUMAN Protein S100-A2 OS=Homo sapiens GN=S100A2 PE=1 SV=1
2582	A0A0D9RWX3;Q14192;J3KNW4;A0A0A0MSG2	FHL2	Four and a half LIM domains protein 2	22	22	79.6	32.165	279	282.81		2.49523	2.40322	0.0920105		2.39282	1.66749	0.0555764	+	+	+_+			15	17	17	19	17	17	17	19	20	23875000000		31.8172	32.0607	30.8351	28.7742	29.4306	29.0224	29.8555	29.5415	28.1063		tr|A0A0D9RWX3|A0A0D9RWX3_CHLSB Uncharacterized protein OS=Chlorocebus sabaeus GN=FHL2 PE=4 SV=1;sp|Q14192|FHL2_HUMAN Four and a half LIM domains protein 2 OS=Homo sapiens GN=FHL2 PE=1 SV=3;tr|J3KNW4|J3KNW4_HUMAN Four and a half LIM domains protein 2 OS=Hom
1725	A0A0D9RIE1;P42224;P42224-2;J3KPM9	STAT1	Signal transducer and activator of transcription 1-alpha/beta;Signal transducer and activator of transcription	35	35	60.1	87.376	750	323.31		0.373603	0.206889	0.166714		0.553911	0.376373	0.239654						30	31	32	29	31	30	28	26	28	23423000000		29.8779	30.3586	30.4784	30.3024	29.7981	29.4936	30.1945	29.7533	30.1464		tr|A0A0D9RIE1|A0A0D9RIE1_CHLSB Signal transducer and activator of transcription OS=Chlorocebus sabaeus GN=STAT1 PE=3 SV=1;sp|P42224|STAT1_HUMAN Signal transducer and activator of transcription 1-alpha/beta OS=Homo sapiens GN=STAT1 PE=1 SV=2;sp|P42224-2|STA
1557	A0A0D9RFT6;O95347;O95347-2	SMC2	Structural maintenance of chromosomes protein 2	56	56	49.6	135.59	1197	323.31		-6.84464	-6.48056	-0.364086		4.68539	4.14111	0.580537	+	+	+_+			44	47	48	44	50	46	5	5	7	23395000000		23.7434	22.9802	23.8799	30.4206	30.1975	30.5193	30.0866	30.4303	29.5283		tr|A0A0D9RFT6|A0A0D9RFT6_CHLSB Structural maintenance of chromosomes protein OS=Chlorocebus sabaeus GN=SMC2 PE=3 SV=1;sp|O95347|SMC2_HUMAN Structural maintenance of chromosomes protein 2 OS=Homo sapiens GN=SMC2 PE=1 SV=2;sp|O95347-2|SMC2_HUMAN Isoform 2 of
3432	A0A0D9SD81;A0A0G2JIW1;P0DMV9;P0DMV8;P0DMV8-2;V9GZ37	HSPA1B;HSPA1A	Heat shock 70 kDa protein 1B;Heat shock 70 kDa protein 1A	39	19	69.3	70.051	641	323.31		-1.11077	-0.851978	-0.258787		1.92536	1.57924	0.850708						15	17	18	16	19	16	13	13	14	21856000000		29.3974	29.1607	28.6203	30.1761	29.9822	30.3525	29.7267	29.9987	30.0089		tr|A0A0D9SD81|A0A0D9SD81_CHLSB Uncharacterized protein OS=Chlorocebus sabaeus PE=3 SV=1;tr|A0A0G2JIW1|A0A0G2JIW1_HUMAN Heat shock 70 kDa protein 1B OS=Homo sapiens GN=HSPA1B PE=1 SV=1;sp|P0DMV9|HS71B_HUMAN Heat shock 70 kDa protein 1B OS=Homo sapiens GN=HS
1100	A0A0D9R8E0;P04843;B7Z4L4	RPN1	Dolichyl-diphosphooligosaccharide--protein glycosyltransferase subunit 1	37	37	61.9	68.721	607	323.31		-1.90781	-1.54741	-0.3604		2.93776	2.53474	1.84786	+	+	+_+			27	33	30	33	32	31	16	11	14	21853000000		27.9995	28.2662	28.7711	30.2166	30.3364	30.2072	29.8603	30.0381	29.7807		tr|A0A0D9R8E0|A0A0D9R8E0_CHLSB Dolichyl-diphosphooligosaccharide--protein glycosyltransferase subunit 1 OS=Chlorocebus sabaeus GN=RPN1 PE=3 SV=1;sp|P04843|RPN1_HUMAN Dolichyl-diphosphooligosaccharide--protein glycosyltransferase subunit 1 OS=Homo sapiens G
1648	A0A0D9RH35;P35998;P35998-2	PSMC2	26S protease regulatory subunit 7	20	20	54.5	48.633	433	95.927		-4.6476	-3.89641	-0.75119		2.96693	2.49155	0.871092	+	+	+_+			14	16	18	17	19	17	6	7	5	21245000000		26.7238	25.3598	25.0621	30.6954	30.4004	29.9927	29.4824	30.2646	29.088		tr|A0A0D9RH35|A0A0D9RH35_CHLSB Uncharacterized protein OS=Chlorocebus sabaeus GN=PSMC2 PE=3 SV=1;sp|P35998|PRS7_HUMAN 26S protease regulatory subunit 7 OS=Homo sapiens GN=PSMC2 PE=1 SV=3;sp|P35998-2|PRS7_HUMAN Isoform 2 of 26S protease regulatory subunit 7
1341	A0A0D9RC70;Q9Y5L0;C9J7E5;Q9Y5L0-3;Q9Y5L0-1;Q9Y5L0-5;E9PFH4	TNPO3	Transportin-3	38	38	47.2	104.18	923	322.05		-7.3462	-7.1341	-0.212107		4.51634	4.11272	0.332748	+	+	+_+			29	34	31	33	34	36	2	1	1	21162000000		NaN	NaN	23.1049	30.219	30.0362	30.2033	30.2293	30.163	29.4298		tr|A0A0D9RC70|A0A0D9RC70_CHLSB Uncharacterized protein OS=Chlorocebus sabaeus GN=TNPO3 PE=4 SV=1;sp|Q9Y5L0|TNPO3_HUMAN Transportin-3 OS=Homo sapiens GN=TNPO3 PE=1 SV=3;tr|C9J7E5|C9J7E5_HUMAN Transportin-3 OS=Homo sapiens GN=TNPO3 PE=1 SV=1;sp|Q9Y5L0-3|TNPO
2641	A0A0D9RXV5;Q15645	TRIP13	Pachytene checkpoint protein 2 homolog	29	29	63	48.517	432	323.31		-2.21365	-1.87362	-0.340033		3.15712	2.3806	0.694651	+	+	+_+			22	27	29	26	28	28	10	11	12	20829000000		27.8446	28.3587	27.5723	30.2162	30.0831	30.1172	29.7211	30.2116	29.4636		tr|A0A0D9RXV5|A0A0D9RXV5_CHLSB Uncharacterized protein OS=Chlorocebus sabaeus GN=TRIP13 PE=3 SV=1;sp|Q15645|PCH2_HUMAN Pachytene checkpoint protein 2 homolog OS=Homo sapiens GN=TRIP13 PE=1 SV=2
2287	A0A0D9RS70	IQGAP2	Uncharacterized protein	116	16	67.6	180.44	1575	323.31		-6.81976	-6.81494	-0.00482432		3.74324	3.63148	0.00510035	+	+	+_+			14	16	15	15	12	15	1	1	1	20510000000		NaN	NaN	NaN	30.0522	30.2748	29.6809	30.5047	29.8179	29.6708		tr|A0A0D9RS70|A0A0D9RS70_CHLSB Uncharacterized protein OS=Chlorocebus sabaeus GN=IQGAP2 PE=4 SV=1
846	A0A0D9R4I0;O15269	SPTLC1	Serine palmitoyltransferase 1	21	21	47.8	52.768	473	323.31		-1.87686	-1.7012	-0.17566		3.07678	2.65002	0.432971	+	+	+_+			19	20	20	17	19	20	9	11	9	20440000000		28.0014	28.3825	27.7238	30.0372	29.7555	29.9456	29.9043	29.8746	29.4324		tr|A0A0D9R4I0|A0A0D9R4I0_CHLSB Uncharacterized protein OS=Chlorocebus sabaeus GN=SPTLC1 PE=4 SV=1;sp|O15269|SPTC1_HUMAN Serine palmitoyltransferase 1 OS=Homo sapiens GN=SPTLC1 PE=1 SV=1
2051	A0A0D9RNB8;Q93008-1;Q93008	USP9X	Probable ubiquitin carboxyl-terminal hydrolase FAF-X	82	82	41	290.38	2554	323.31		-5.9136	-6.17158	0.257973		3.88577	4.22572	0.350952	+	+	+_+			69	68	71	62	62	74	7	4	4	20405000000		23.7448	23.5114	24.5387	30.3543	29.6993	29.4821	30.3841	30.0823	29.8431		tr|A0A0D9RNB8|A0A0D9RNB8_CHLSB Uncharacterized protein OS=Chlorocebus sabaeus GN=USP9X PE=3 SV=1;sp|Q93008-1|USP9X_HUMAN Isoform 2 of Probable ubiquitin carboxyl-terminal hydrolase FAF-X OS=Homo sapiens GN=USP9X;sp|Q93008|USP9X_HUMAN Probable ubiquitin car
859	A0A0D9R4M2;P09382	LGALS1	Galectin-1	11	11	94.1	14.703	135	170.83		1.78617	1.64768	0.13849		3.2894	2.99325	0.790437	+	+	+_+			9	10	10	9	8	10	10	10	11	20392000000		31.162	31.3847	30.787	29.3173	29.3374	29.3204	29.6098	29.4492	29.3316		tr|A0A0D9R4M2|A0A0D9R4M2_CHLSB Galectin OS=Chlorocebus sabaeus GN=LGALS1 PE=4 SV=1;sp|P09382|LEG1_HUMAN Galectin-1 OS=Homo sapiens GN=LGALS1 PE=1 SV=2
317	A0A0D9QWP5;O43592	XPOT	Exportin-T	41	41	57.3	109.98	962	323.31		-6.53601	-6.15727	-0.378733		5.44216	4.58075	0.776537	+	+	+_+			31	37	38	36	38	37	3	2	1	20282000000		23.4152	NaN	23.9362	30.131	30.0367	30.188	29.8859	30.027	29.3066		tr|A0A0D9QWP5|A0A0D9QWP5_CHLSB Uncharacterized protein OS=Chlorocebus sabaeus GN=XPOT PE=4 SV=1;sp|O43592|XPOT_HUMAN Exportin-T OS=Homo sapiens GN=XPOT PE=1 SV=2
665	A0A0D9R203;A0A087X211;Q8TCG1;Q8TCG1-2	KIAA1524	Protein CIP2A	39	39	41.2	102.67	910	260.13		-7.11548	-6.60047	-0.515009		3.0304	3.02484	0.46926	+	+	+_+			28	33	35	36	35	33	1	1	2	20237000000		NaN	24.4902	NaN	29.4213	30.5654	30.6496	29.7768	30.1065	29.2079		tr|A0A0D9R203|A0A0D9R203_CHLSB Uncharacterized protein OS=Chlorocebus sabaeus GN=KIAA1524 PE=4 SV=1;tr|A0A087X211|A0A087X211_HUMAN Protein CIP2A OS=Homo sapiens GN=KIAA1524 PE=1 SV=1;sp|Q8TCG1|CIP2A_HUMAN Protein CIP2A OS=Homo sapiens GN=KIAA1524 PE=1 SV=2
3137	A0A0D9S6C6	SLC16A1	Uncharacterized protein	12	12	13.6	54.126	500	323.31		-1.99857	-2.06238	0.0638103		2.75573	2.44269	0.0593867	+	+	+_+			11	12	12	12	12	12	5	5	5	20003000000		27.7456	28.0658	27.5362	29.8222	30.1411	29.38	29.9754	30.2863	29.273		tr|A0A0D9S6C6|A0A0D9S6C6_CHLSB Uncharacterized protein OS=Chlorocebus sabaeus GN=SLC16A1 PE=4 SV=1
2145	A0A0D9RPS6;Q5SRE5;Q5SRE5-2	NUP188	Nucleoporin NUP188 homolog	56	56	39.5	196.84	1753	323.31		-5.54779	-5.50737	-0.0404212		2.45695	2.382	0.0287384	+	+	+_+			40	53	51	49	49	47	1	2	0	19989000000		26.0151	NaN	NaN	29.6862	30.4778	29.5968	29.7206	30.6047	29.3143		tr|A0A0D9RPS6|A0A0D9RPS6_CHLSB Uncharacterized protein OS=Chlorocebus sabaeus GN=NUP188 PE=4 SV=1;sp|Q5SRE5|NU188_HUMAN Nucleoporin NUP188 homolog OS=Homo sapiens GN=NUP188 PE=1 SV=1;sp|Q5SRE5-2|NU188_HUMAN Isoform 2 of Nucleoporin NUP188 homolog OS=Homo s
3335	A0A0D9SC15;A0A0D9S9P8;A0A0D9SD70		Thioredoxin	9	1	66.7	11.722	105	60.685		1.34874	-0.396143	1.74488		0.132985	0.0463161	0.294707						1	1	1	1	1	1	1	1	1	18850000000		31.1089	NaN	31.52	NaN	29.377	29.491	29.4276	29.045	27.9847		tr|A0A0D9SC15|A0A0D9SC15_CHLSB Thioredoxin OS=Chlorocebus sabaeus PE=3 SV=1;tr|A0A0D9S9P8|A0A0D9S9P8_CHLSB Thioredoxin OS=Chlorocebus sabaeus PE=3 SV=1;tr|A0A0D9SD70|A0A0D9SD70_CHLSB Thioredoxin OS=Chlorocebus sabaeus PE=3 SV=1
1293	A0A0D9RBD8;P06748;P06748-2;P06748-3	NPM1	Nucleophosmin	15	15	60.2	32.561	294	323.31		0.647775	-0.860472	1.50825		1.08183	0.189393	0.359926						15	7	7	7	7	9	5	6	4	18701000000		28.1297	27.6264	27.6934	27.4991	27.2883	26.7187	26.9267	26.965	32.1392		tr|A0A0D9RBD8|A0A0D9RBD8_CHLSB Uncharacterized protein OS=Chlorocebus sabaeus PE=4 SV=1;sp|P06748|NPM_HUMAN Nucleophosmin OS=Homo sapiens GN=NPM1 PE=1 SV=2;sp|P06748-2|NPM_HUMAN Isoform 2 of Nucleophosmin OS=Homo sapiens GN=NPM1;sp|P06748-3|NPM_HUMAN Isofo
3630	F6KXZ0	Chsa-A	MHC class IA antigen	10	4	29.6	41.15	365	172.58		-3.34219	-2.78875	-0.553444		3.48646	2.02478	0.374954	+	+	+_+			3	3	4	2	2	4	1	2	1	18337000000		26.3349	26.7171	26.906	29.5714	30.0217	30.3915	30.0513	29.974	28.2989		tr|F6KXZ0|F6KXZ0_CHLSB MHC class IA antigen OS=Chlorocebus sabaeus GN=Chsa-A PE=2 SV=1
3055	A0A0D9S4W9;P49368;B4DUR8;P49368-2	CCT3	T-complex protein 1 subunit gamma	30	30	66.8	60.516	545	291.03		-0.640399	-0.613545	-0.0268536		2.8243	1.68236	0.0528159						28	30	28	28	28	28	16	12	16	18230000000		28.9932	28.9045	29.0516	29.5582	29.5474	29.7649	29.7805	29.7318	29.2778		tr|A0A0D9S4W9|A0A0D9S4W9_CHLSB T-complex protein 1 subunit gamma OS=Chlorocebus sabaeus GN=CCT3 PE=3 SV=1;sp|P49368|TCPG_HUMAN T-complex protein 1 subunit gamma OS=Homo sapiens GN=CCT3 PE=1 SV=4;tr|B4DUR8|B4DUR8_HUMAN T-complex protein 1 subunit gamma OS=H
1295	A0A0D9RBE4;F8VPD4;P27708	CAD	CAD protein;Glutamine-dependent carbamoyl-phosphate synthase;Aspartate carbamoyltransferase;Dihydroorotase	65	65	39	243.15	2225	323.31	1859	-0.30002	-0.114181	-0.185839		0.776131	0.228206	0.829923						51	55	57	55	52	54	28	29	36	17965000000		29.1505	29.7062	29.2401	29.6715	29.7413	29.5841	29.5658	29.5803	29.2933		tr|A0A0D9RBE4|A0A0D9RBE4_CHLSB Uncharacterized protein OS=Chlorocebus sabaeus GN=CAD PE=3 SV=1;tr|F8VPD4|F8VPD4_HUMAN CAD protein OS=Homo sapiens GN=CAD PE=1 SV=1;sp|P27708|PYR1_HUMAN CAD protein OS=Homo sapiens GN=CAD PE=1 SV=3
3020	A0A0D9S4D0	RNF213	Uncharacterized protein	173	115	38.9	595.64	5249	323.31		-4.36411	-5.33666	0.972548		2.93457	3.32087	0.93946	+	+	+_+			88	94	95	78	79	89	2	3	4	17430000000		25.1613	23.9742	25.1314	28.7659	29.8275	28.7658	30.6603	30.1006	29.5159		tr|A0A0D9S4D0|A0A0D9S4D0_CHLSB Uncharacterized protein OS=Chlorocebus sabaeus GN=RNF213 PE=4 SV=1
1096	A0A0D9R8B5;Q8NE86-3;Q8NE86;Q8NE86-2	MCU	Calcium uniporter protein, mitochondrial	19	19	55.1	36.571	314	221.26		-5.50648	-4.96717	-0.539307		5.83819	4.94718	1.36644	+	+	+_+			13	18	17	18	17	18	2	2	2	17099000000		24.4079	24.4927	24.6992	29.8773	30.1718	30.0702	29.4258	29.8124	29.2632		tr|A0A0D9R8B5|A0A0D9R8B5_CHLSB Uncharacterized protein OS=Chlorocebus sabaeus GN=MCU PE=4 SV=1;sp|Q8NE86-3|MCU_HUMAN Isoform 3 of Calcium uniporter protein, mitochondrial OS=Homo sapiens GN=MCU;sp|Q8NE86|MCU_HUMAN Calcium uniporter protein, mitochondrial O
4324	Q9UIA9;E7ESC6;A0A0D9RVL3	XPO7	Exportin-7	49	48	53.2	123.91	1087	323.31		-6.65586	-6.42027	-0.235594		5.42417	4.4275	0.30274	+	+	+_+			36	45	38	42	40	43	4	4	4	17066000000		23.3648	22.9182	23.2987	29.5989	29.9913	29.9591	29.6745	30.0844	29.0836		sp|Q9UIA9|XPO7_HUMAN Exportin-7 OS=Homo sapiens GN=XPO7 PE=1 SV=3;tr|E7ESC6|E7ESC6_HUMAN Exportin-7 OS=Homo sapiens GN=XPO7 PE=1 SV=1;tr|A0A0D9RVL3|A0A0D9RVL3_CHLSB Uncharacterized protein OS=Chlorocebus sabaeus GN=XPO7 PE=4 SV=1
361	A0A0D9QXH8;P62993;J3KT38;P62993-2	GRB2	Growth factor receptor-bound protein 2	20	20	78.3	25.206	217	96.811		-2.50683	-2.63268	0.125846		1.46062	2.11583	0.07031	+	+	+_+			17	18	18	15	17	18	7	5	9	16989000000		25.8729	27.3101	27.489	30.613	28.8945	28.685	29.3628	29.4086	29.7985		tr|A0A0D9QXH8|A0A0D9QXH8_CHLSB Uncharacterized protein OS=Chlorocebus sabaeus GN=GRB2 PE=4 SV=1;sp|P62993|GRB2_HUMAN Growth factor receptor-bound protein 2 OS=Homo sapiens GN=GRB2 PE=1 SV=1;tr|J3KT38|J3KT38_HUMAN Growth factor receptor-bound protein 2 (Fra
3811	P04792;A0A0D9RZW6	HSPB1	Heat shock protein beta-1	17	17	89.8	22.782	205	265.75		0.553261	0.524372	0.0288893		1.24874	1.09606	0.0378095						14	15	14	12	15	14	8	9	10	16765000000		30.1536	29.7644	29.8788	29.0399	29.4892	29.6079	29.1644	29.2702	29.7891		sp|P04792|HSPB1_HUMAN Heat shock protein beta-1 OS=Homo sapiens GN=HSPB1 PE=1 SV=2;tr|A0A0D9RZW6|A0A0D9RZW6_CHLSB Uncharacterized protein OS=Chlorocebus sabaeus GN=HSPB1 PE=3 SV=1
1879	A0A0D9RKP4	BSG	Uncharacterized protein	9	9	28.6	41.893	385	206.29		-2.11055	-1.82825	-0.282297		3.4506	2.47833	0.385792	+	+	+_+			9	9	9	8	8	9	4	6	5	16745000000		27.48	27.4334	27.7933	29.8936	29.7531	29.3916	29.3671	29.878	28.9464		tr|A0A0D9RKP4|A0A0D9RKP4_CHLSB Uncharacterized protein OS=Chlorocebus sabaeus GN=BSG PE=4 SV=1
355	A0A0D9QXF2;P53618;E9PP73	COPB1	Coatomer subunit beta	44	44	52.6	107.16	953	323.31		-4.22592	-4.08147	-0.144452		4.6356	3.43951	0.167553	+	+	+_+			36	41	39	40	41	38	8	7	7	16672000000		25.2263	25.8351	25.593	29.9012	29.6941	29.7368	29.6746	30.1635	29.0607		tr|A0A0D9QXF2|A0A0D9QXF2_CHLSB Coatomer subunit beta OS=Chlorocebus sabaeus GN=COPB1 PE=4 SV=1;sp|P53618|COPB_HUMAN Coatomer subunit beta OS=Homo sapiens GN=COPB1 PE=1 SV=3;tr|E9PP73|E9PP73_HUMAN Coatomer subunit beta (Fragment) OS=Homo sapiens GN=COPB1 PE
3051	A0A0D9S4V1	IQGAP3	Uncharacterized protein	92	21	59.1	184.65	1632	323.31		-7.3994	-6.77381	-0.625589		3.86231	3.49366	0.924734	+	+	+_+			16	20	17	19	18	17	0	0	1	16496000000		NaN	NaN	NaN	29.6566	29.9238	30.005	29.5093	29.5586	28.6408		tr|A0A0D9S4V1|A0A0D9S4V1_CHLSB Uncharacterized protein OS=Chlorocebus sabaeus GN=IQGAP3 PE=4 SV=1
2899	A0A0D9S293;P09543-2;P09543	CNP	2,3-cyclic-nucleotide 3-phosphodiesterase	24	24	57.5	47.521	421	323.31		-0.619917	-0.390755	-0.229162		2.15338	1.93324	1.05838						20	22	20	19	20	21	17	16	18	16414000000		28.945	29.0984	28.8269	29.4004	29.7162	29.6135	29.4228	29.3392	29.2806		tr|A0A0D9S293|A0A0D9S293_CHLSB 2,3-cyclic-nucleotide 3-phosphodiesterase OS=Chlorocebus sabaeus GN=CNP PE=3 SV=1;sp|P09543-2|CN37_HUMAN Isoform CNPI of 2,3-cyclic-nucleotide 3-phosphodiesterase OS=Homo sapiens GN=CNP;sp|P09543|CN37_HUMAN 2,3-cyclic
2656	A0A0D9RY49;Q9BUF5;K7ESM5	TUBB6	Tubulin beta-6 chain	30	12	82.1	49.83	446	323.31		-1.67056	-0.938488	-0.732068		2.07214	1.17099	1.42752	+					10	11	10	11	12	10	8	8	7	16403000000		28.2882	28.4976	27.4503	29.534	29.7258	29.9879	29.2186	29.2139	28.6191		tr|A0A0D9RY49|A0A0D9RY49_CHLSB Tubulin beta chain OS=Chlorocebus sabaeus GN=TUBB6 PE=3 SV=1;sp|Q9BUF5|TBB6_HUMAN Tubulin beta-6 chain OS=Homo sapiens GN=TUBB6 PE=1 SV=1;tr|K7ESM5|K7ESM5_HUMAN Tubulin beta chain (Fragment) OS=Homo sapiens GN=TUBB6 PE=1 SV=1
3376	A0A0D9SAY9;O60518	RANBP6	Ran-binding protein 6	47	44	52.5	124.75	1105	323.31		-7.43122	-6.92031	-0.510916		5.17725	4.10461	0.513915	+	+	+_+			38	43	41	41	42	42	3	2	3	16325000000		22.2319	22.7356	22.4033	29.5065	30.0929	30.065	29.6786	29.8532	28.6		tr|A0A0D9SAY9|A0A0D9SAY9_CHLSB Uncharacterized protein OS=Chlorocebus sabaeus GN=RANBP6 PE=4 SV=1;sp|O60518|RNBP6_HUMAN Ran-binding protein 6 OS=Homo sapiens GN=RANBP6 PE=1 SV=2
1479	A0A0D9REE8;Q8TEQ6	GEMIN5	Gem-associated protein 5	49	49	41	169.12	1512	323.31		-5.3029	-5.2912	-0.0117041		3.83883	3.56205	0.0073094	+	+	+_+			40	47	48	40	43	44	3	3	4	16085000000		23.9394	24.4104	24.479	28.9317	30.0473	29.7585	30.2599	29.5885	28.854		tr|A0A0D9REE8|A0A0D9REE8_CHLSB Uncharacterized protein OS=Chlorocebus sabaeus GN=GEMIN5 PE=4 SV=1;sp|Q8TEQ6|GEMI5_HUMAN Gem-associated protein 5 OS=Homo sapiens GN=GEMIN5 PE=1 SV=3
2985	A0A0D9S3P5;P53621;P53621-2	COPA	Coatomer subunit alpha;Xenin;Proxenin	53	53	51.4	138.34	1224	323.31		-5.30046	-5.16842	-0.132043		4.63117	4.82249	0.404501	+	+	+_+			46	49	49	42	45	50	7	5	6	16016000000		24.1268	24.4127	24.813	29.9966	29.5691	29.6882	29.6441	29.6981	29.5157		tr|A0A0D9S3P5|A0A0D9S3P5_CHLSB Coatomer subunit alpha OS=Chlorocebus sabaeus GN=COPA PE=4 SV=1;sp|P53621|COPA_HUMAN Coatomer subunit alpha OS=Homo sapiens GN=COPA PE=1 SV=2;sp|P53621-2|COPA_HUMAN Isoform 2 of Coatomer subunit alpha OS=Homo sapiens GN=COPA
1311	A0A0D9RBR7;P22102	GART	Trifunctional purine biosynthetic protein adenosine-3;Phosphoribosylamine--glycine ligase;Phosphoribosylformylglycinamidine cyclo-ligase;Phosphoribosylglycinamide formyltransferase	46	46	58.7	107.71	1010	323.31		1.58568	1.41542	0.170257		3.15388	2.91807	0.863877	+	+	+_+			34	33	36	31	33	37	40	38	38	15733000000		30.3333	30.6461	30.8769	29.1341	28.9324	29.0328	29.3402	29.1665	29.1033		tr|A0A0D9RBR7|A0A0D9RBR7_CHLSB Trifunctional purine biosynthetic protein adenosine-3 OS=Chlorocebus sabaeus GN=GART PE=3 SV=1;sp|P22102|PUR2_HUMAN Trifunctional purine biosynthetic protein adenosine-3 OS=Homo sapiens GN=GART PE=1 SV=1
2086	A0A0D9RNX3;P22626;P22626-2;A0A087WUI2;A0A0D9QYM4	HNRNPA2B1	Heterogeneous nuclear ribonucleoproteins A2/B1	27	26	64.9	37.429	353	323.31		0.358366	-1.08711	1.44548		0.870095	0.381821	0.5383						25	16	14	15	14	14	8	8	6	15467000000		28.2665	27.8272	28.4325	27.9455	27.7523	27.7533	27.9603	28.2023	31.6249		tr|A0A0D9RNX3|A0A0D9RNX3_CHLSB Uncharacterized protein OS=Chlorocebus sabaeus PE=4 SV=1;sp|P22626|ROA2_HUMAN Heterogeneous nuclear ribonucleoproteins A2/B1 OS=Homo sapiens GN=HNRNPA2B1 PE=1 SV=2;sp|P22626-2|ROA2_HUMAN Isoform A2 of Heterogeneous nuclear ri
3715	LOF002;LOF003	FAM49B	LOF002 GFP-Fam49B (64.5kDa);in|LOF003|LOF003 Fam49B-GFP (64.4 kDa)	56	21	84.9	64.485	570	236.9		-5.70829	-3.56014	-2.14815		2.25233	1.52057	2.78078	+	+	+_+			16	16	16	19	19	19	2	1	3	15451000000		NaN	25.4138	25.9988	30.1918	30.4521	30.4981	28.4296	28.5664	27.7015		in|LOF002|LOF002 GFP-Fam49B (64.5kDa) ;in|LOF003|LOF003 Fam49B-GFP (64.4 kDa)
1724	A0A0D9RID9;P49770;G3V5E5	EIF2B2	Translation initiation factor eIF-2B subunit beta	21	21	63.8	38.959	351	323.31		-6.06911	-5.57528	-0.49383		3.85986	3.55467	0.747936	+	+	+_+			16	17	19	20	20	17	3	1	2	15438000000		NaN	24.5224	23.5991	29.6303	30.1701	29.7343	29.4316	29.7454	28.8762		tr|A0A0D9RID9|A0A0D9RID9_CHLSB Uncharacterized protein OS=Chlorocebus sabaeus GN=EIF2B2 PE=3 SV=1;sp|P49770|EI2BB_HUMAN Translation initiation factor eIF-2B subunit beta OS=Homo sapiens GN=EIF2B2 PE=1 SV=3;tr|G3V5E5|G3V5E5_HUMAN Translation initiation fact
656	A0A0D9R1W7;P49411	TUFM	Elongation factor Tu, mitochondrial	24	24	57.8	50.082	455	323.31		0.137016	0.0042216	0.132795		0.61671	0.00994883	0.550654						22	23	22	23	21	22	18	19	19	15389000000		29.3497	29.5468	29.2196	29.1828	29.235	29.2873	29.2497	29.5718	29.282		tr|A0A0D9R1W7|A0A0D9R1W7_CHLSB Elongation factor Tu OS=Chlorocebus sabaeus GN=TUFM PE=3 SV=1;sp|P49411|EFTU_HUMAN Elongation factor Tu, mitochondrial OS=Homo sapiens GN=TUFM PE=1 SV=2
2011	A0A0D9RML4;Q13200;Q13200-3;Q13200-2	PSMD2	26S proteasome non-ATPase regulatory subunit 2	43	43	58.5	100.21	908	323.31		-1.86705	-1.93718	0.0701358		2.47597	3.8481	0.0834753	+	+	+_+			34	37	37	34	34	41	12	12	12	15298000000		27.7579	27.5842	27.4171	30.0143	29.1199	29.2262	29.3662	29.6918	29.5128		tr|A0A0D9RML4|A0A0D9RML4_CHLSB Uncharacterized protein OS=Chlorocebus sabaeus GN=PSMD2 PE=4 SV=1;sp|Q13200|PSMD2_HUMAN 26S proteasome non-ATPase regulatory subunit 2 OS=Homo sapiens GN=PSMD2 PE=1 SV=3;sp|Q13200-3|PSMD2_HUMAN Isoform 3 of 26S proteasome non
3992	P63104;A0A0D9RHV9;E7EX29;E7ESK7;B0AZS6	YWHAZ	14-3-3 protein zeta/delta	22	18	65.3	27.745	245	323.31		-0.889177	-0.799692	-0.0894852		1.27898	1.11058	0.231185						12	13	13	15	14	15	12	13	8	15252000000		29.0247	27.9905	28.8052	29.6294	29.5225	29.336	29.6195	29.1857	29.4143		sp|P63104|1433Z_HUMAN 14-3-3 protein zeta/delta OS=Homo sapiens GN=YWHAZ PE=1 SV=1;tr|A0A0D9RHV9|A0A0D9RHV9_CHLSB Uncharacterized protein OS=Chlorocebus sabaeus GN=YWHAZ PE=3 SV=1;tr|E7EX29|E7EX29_HUMAN 14-3-3 protein zeta/delta (Fragment) OS=Homo sapiens
4087	Q29RF7;A0A0D9RWM3	PDS5A	Sister chromatid cohesion protein PDS5 homolog A	54	50	49.4	150.83	1337	323.31		-4.09434	-3.99431	-0.100035		2.487	2.45331	0.132365	+	+	+_+			41	48	45	48	46	43	4	4	2	15240000000		24.3037	26.321	25.9413	29.2181	29.8575	29.7735	29.6252	29.782	29.1418		sp|Q29RF7|PDS5A_HUMAN Sister chromatid cohesion protein PDS5 homolog A OS=Homo sapiens GN=PDS5A PE=1 SV=1;tr|A0A0D9RWM3|A0A0D9RWM3_CHLSB Uncharacterized protein OS=Chlorocebus sabaeus GN=PDS5A PE=4 SV=1
3466	A0A0D9SFB3;A0A0D9SG12;A0A0D9SF53;O00571;O00571-2;A0A0D9S0E1;O15523-2;O15523;A0A0D9RNA2	DDX3X;DDX3Y	ATP-dependent RNA helicase DDX3X;ATP-dependent RNA helicase DDX3Y	30	29	54.2	70.839	640	300.88		-0.550843	-0.955996	0.405153		0.978362	1.62251	2.37399						28	25	25	25	24	25	22	20	22	15182000000		28.7381	29.0926	28.1913	29.2823	29.21	29.1822	29.7037	29.506	29.6803		tr|A0A0D9SFB3|A0A0D9SFB3_HUMAN ATP-dependent RNA helicase DDX3X OS=Homo sapiens GN=DDX3X PE=1 SV=1;tr|A0A0D9SG12|A0A0D9SG12_HUMAN ATP-dependent RNA helicase DDX3X OS=Homo sapiens GN=DDX3X PE=1 SV=1;tr|A0A0D9SF53|A0A0D9SF53_HUMAN ATP-dependent RNA helicase
1598	A0A0D9RGD1;P60842;J3KT12;P60842-2;J3QS69;J3KTB5;J3QL43	EIF4A1	Eukaryotic initiation factor 4A-I	33	17	80.3	46.153	406	323.31		-1.76575	-1.57178	-0.193967		3.07781	3.67599	0.470803	+	+	+_+			16	17	17	15	16	17	10	8	8	14860000000		27.7734	27.4865	27.8159	29.6926	29.1367	29.5438	29.1887	29.209	29.3935		tr|A0A0D9RGD1|A0A0D9RGD1_CHLSB Uncharacterized protein OS=Chlorocebus sabaeus GN=EIF4A1 PE=3 SV=1;sp|P60842|IF4A1_HUMAN Eukaryotic initiation factor 4A-I OS=Homo sapiens GN=EIF4A1 PE=1 SV=1;tr|J3KT12|J3KT12_HUMAN Eukaryotic initiation factor 4A-I OS=Homo s
657	A0A0D9R1X6;Q9NZ01	TECR	Very-long-chain enoyl-CoA reductase	15	15	38.6	36.02	308	42.324		-2.33199	-2.31031	-0.0216789		3.15814	3.45113	0.0253215	+	+	+_+			12	12	15	14	14	14	5	4	5	14849000000		26.9529	27.2966	27.0625	29.5975	29.7182	28.9923	29.6533	29.5241	29.0656		tr|A0A0D9R1X6|A0A0D9R1X6_CHLSB Uncharacterized protein OS=Chlorocebus sabaeus GN=TECR PE=4 SV=1;sp|Q9NZ01|TECR_HUMAN Very-long-chain enoyl-CoA reductase OS=Homo sapiens GN=TECR PE=1 SV=1
3823	P07900-2;P07900	HSP90AA1	Heat shock protein HSP 90-alpha	46	18	49.3	98.16	854	323.31	353	-0.85058	-0.680041	-0.170539		1.67685	1.13774	0.449224						15	14	16	16	16	16	7	7	6	14403000000		28.3047	28.3981	29.0357	29.3898	29.4428	29.4577	29.3416	29.4901	28.947		sp|P07900-2|HS90A_HUMAN Isoform 2 of Heat shock protein HSP 90-alpha OS=Homo sapiens GN=HSP90AA1;sp|P07900|HS90A_HUMAN Heat shock protein HSP 90-alpha OS=Homo sapiens GN=HSP90AA1 PE=1 SV=5
3656	G5E9Q6;P35080-2;C9J0J7	PFN2	Profilin;Profilin-2	10	5	66.5	20.787	188	68.849		2.99693	2.67551	0.321418		3.41361	2.55749	0.386412	+	+	+_+			5	4	4	4	4	4	5	5	5	14333000000		31.1148	30.7537	31.5887	27.9062	28.2761	28.2842	28.9013	28.6964	27.833		tr|G5E9Q6|G5E9Q6_HUMAN Profilin OS=Homo sapiens GN=PFN2 PE=1 SV=1;sp|P35080-2|PROF2_HUMAN Isoform IIb of Profilin-2 OS=Homo sapiens GN=PFN2;tr|C9J0J7|C9J0J7_HUMAN Profilin OS=Homo sapiens GN=PFN2 PE=1 SV=1
3145	A0A0D9S6G0;P24539	ATP5F1	ATP synthase F(0) complex subunit B1, mitochondrial	11	11	47.7	28.774	256	214.81		-1.56923	-0.871813	-0.697415		2.33353	1.40891	2.18567	+					11	11	10	11	11	11	6	5	6	13922000000		27.7615	28.1082	28.6712	29.893	29.6742	29.6813	29.0983	29.2212	28.8368		tr|A0A0D9S6G0|A0A0D9S6G0_CHLSB Uncharacterized protein OS=Chlorocebus sabaeus GN=ATP5F1 PE=4 SV=1;sp|P24539|AT5F1_HUMAN ATP synthase F(0) complex subunit B1, mitochondrial OS=Homo sapiens GN=ATP5F1 PE=1 SV=2
2350	A0A0D9RT05;B4DP61;E7EQZ4;Q16637-3;Q16637;Q16637-4;Q16637-2	SMN2;SMN1	Survival motor neuron protein	9	9	31	31.839	294	102.41		-6.51314	-6.25901	-0.254133		3.65896	3.06055	0.160227	+	+	+_+			7	9	9	7	7	8	0	1	0	13846000000		NaN	NaN	NaN	28.9658	29.6682	29.755	29.8082	29.6882	28.1303		tr|A0A0D9RT05|A0A0D9RT05_CHLSB Uncharacterized protein OS=Chlorocebus sabaeus PE=4 SV=1;tr|B4DP61|B4DP61_HUMAN Survival motor neuron protein OS=Homo sapiens GN=SMN2 PE=1 SV=1;tr|E7EQZ4|E7EQZ4_HUMAN Survival motor neuron protein OS=Homo sapiens GN=SMN1 PE=1
2624	A0A0D9RXL9;P48643;E7ENZ3;B7ZAR1;E9PCA1;P48643-2	CCT5	T-complex protein 1 subunit epsilon	34	34	64	59.656	541	287.2		0.141347	0.111764	0.0295823		0.41282	0.294075	0.066046						29	29	27	25	28	30	17	18	17	13766000000		29.222	28.9529	29.2824	29.2174	28.8784	28.9375	29.2577	28.8615	29.0029		tr|A0A0D9RXL9|A0A0D9RXL9_CHLSB Uncharacterized protein OS=Chlorocebus sabaeus GN=CCT5 PE=3 SV=1;sp|P48643|TCPE_HUMAN T-complex protein 1 subunit epsilon OS=Homo sapiens GN=CCT5 PE=1 SV=1;tr|E7ENZ3|E7ENZ3_HUMAN T-complex protein 1 subunit epsilon OS=Homo sa
3077	A0A0D9S5A4;P30153;B3KQV6	PPP2R1A	Serine/threonine-protein phosphatase 2A 65 kDa regulatory subunit A alpha isoform	35	25	71.8	65.308	589	323.31	9	-1.30768	-1.21437	-0.09331		3.4931	3.22346	0.320475	+					19	20	19	17	18	23	15	14	14	13707000000		28.1182	27.9874	28.2748	29.5689	29.4322	29.3023	29.4376	29.1588	29.4271		tr|A0A0D9S5A4|A0A0D9S5A4_CHLSB Uncharacterized protein OS=Chlorocebus sabaeus GN=PPP2R1A PE=4 SV=1;sp|P30153|2AAA_HUMAN Serine/threonine-protein phosphatase 2A 65 kDa regulatory subunit A alpha isoform OS=Homo sapiens GN=PPP2R1A PE=1 SV=4;tr|B3KQV6|B3KQV6_
277	A0A0D9QW25;P78371;P78371-2;F5GWF6;F8VQ14	CCT2	T-complex protein 1 subunit beta	33	33	73.3	57.488	535	323.31		0.418833	0.322943	0.09589		1.16669	1.00953	0.258415						26	26	24	23	26	25	25	19	20	13536000000		29.6553	29.3166	29.6991	29.3454	28.9373	29.1318	29.3904	29.2296	29.0821		tr|A0A0D9QW25|A0A0D9QW25_CHLSB Uncharacterized protein OS=Chlorocebus sabaeus GN=CCT2 PE=3 SV=1;sp|P78371|TCPB_HUMAN T-complex protein 1 subunit beta OS=Homo sapiens GN=CCT2 PE=1 SV=4;sp|P78371-2|TCPB_HUMAN Isoform 2 of T-complex protein 1 subunit beta OS=
1699	A0A0D9RHX8;P43487-2;P43487;F6WQW2;C9JXG8;C9JGV6	RANBP1	Ran-specific GTPase-activating protein	11	10	70.1	23.31	201	223.76		-3.37499	-2.85552	-0.51947		2.77676	2.53588	0.872124	+	+	+_+			10	9	9	8	9	9	6	5	5	13525000000		26.0136	25.697	27.0201	30.0284	29.3895	29.4377	28.9821	29.4637	28.8514		tr|A0A0D9RHX8|A0A0D9RHX8_CHLSB Uncharacterized protein OS=Chlorocebus sabaeus GN=RANBP1 PE=4 SV=1;sp|P43487-2|RANG_HUMAN Isoform 2 of Ran-specific GTPase-activating protein OS=Homo sapiens GN=RANBP1;sp|P43487|RANG_HUMAN Ran-specific GTPase-activating prote
952	A0A0D9R608;O95573	ACSL3	Long-chain-fatty-acid--CoA ligase 3	35	33	60.7	80.35	720	323.31		-3.48438	-3.22933	-0.255056		2.57215	2.38069	0.633858	+	+	+_+			26	32	30	29	30	27	11	5	7	13484000000		25.133	25.9219	26.9347	29.3575	29.5601	29.5251	29.189	29.5374	28.9512		tr|A0A0D9R608|A0A0D9R608_CHLSB Uncharacterized protein OS=Chlorocebus sabaeus GN=ACSL3 PE=4 SV=1;sp|O95573|ACSL3_HUMAN Long-chain-fatty-acid--CoA ligase 3 OS=Homo sapiens GN=ACSL3 PE=1 SV=3
4092	Q3UV17;Q6IFZ5	Krt76	Keratin, type II cytoskeletal 2 oral	12	1	13	62.844	594	2.1507		-6.40062	-4.59881	-1.80181		3.7489	0.899612	0.310269	+					1	1	1	1	1	1	1	1	1	13448000000		NaN	NaN	NaN	29.2674	28.596	28.3148	29.4282	29.1236	NaN		cn|Q3UV17|MOUSE;cn|Q6IFZ5|RAT
2194	A0A0D9RQJ4;Q5JVZ5;Q96JJ3;Q96JJ3-3;H0YCM7	ELMO2	Engulfment and cell motility protein 2	34	27	47.1	82.642	720	323.31		-6.9443	-6.86366	-0.0806319		4.25049	4.26619	0.212156	+	+	+_+			23	27	21	23	24	24	2	1	0	13337000000		NaN	NaN	NaN	29.6333	29.4978	29.2318	29.502	29.4149	29.2039		tr|A0A0D9RQJ4|A0A0D9RQJ4_CHLSB Uncharacterized protein OS=Chlorocebus sabaeus GN=ELMO2 PE=4 SV=1;tr|Q5JVZ5|Q5JVZ5_HUMAN Engulfment and cell motility protein 2 OS=Homo sapiens GN=ELMO2 PE=1 SV=1;sp|Q96JJ3|ELMO2_HUMAN Engulfment and cell motility protein 2 O
1344	A0A0D9RC89;Q14315-2;Q14315	FLNC	Filamin-C	98	82	45	291.04	2725	323.31		2.02371	1.63909	0.384614		3.99552	3.34963	1.19547	+	+	+_+			44	41	39	37	40	39	61	65	69	13304000000		30.7413	31.0384	30.7673	28.6467	28.9262	28.903	29.4153	28.9936	29.2209		tr|A0A0D9RC89|A0A0D9RC89_CHLSB Uncharacterized protein OS=Chlorocebus sabaeus GN=FLNC PE=4 SV=1;sp|Q14315-2|FLNC_HUMAN Isoform 2 of Filamin-C OS=Homo sapiens GN=FLNC;sp|Q14315|FLNC_HUMAN Filamin-C OS=Homo sapiens GN=FLNC PE=1 SV=3
1472	A0A0D9RE85;Q9Y5M8;H7C4H2	SRPRB	Signal recognition particle receptor subunit beta	16	16	63.1	29.644	271	98.53		-3.66005	-3.05234	-0.607712		3.03874	2.57524	0.564852	+	+	+_+			11	13	14	15	14	14	3	3	4	13052000000		25.7773	26.4261	25.4838	28.9523	29.9661	29.749	29.3247	29.3017	28.2178		tr|A0A0D9RE85|A0A0D9RE85_CHLSB Uncharacterized protein OS=Chlorocebus sabaeus GN=SRPRB PE=4 SV=1;sp|Q9Y5M8|SRPRB_HUMAN Signal recognition particle receptor subunit beta OS=Homo sapiens GN=SRPRB PE=1 SV=3;tr|H7C4H2|H7C4H2_HUMAN Signal recognition particle r
1087	A0A0D9R866;P02786	TFRC	Transferrin receptor protein 1;Transferrin receptor protein 1, serum form	31	31	45.2	86.314	774	218.83		-1.61447	-1.38445	-0.230021		2.6814	2.62649	0.734961	+					22	27	25	24	26	29	14	9	14	12904000000		27.4427	27.7884	28.0992	29.6392	29.231	29.3036	29.1136	29.0727	29.2973		tr|A0A0D9R866|A0A0D9R866_CHLSB Uncharacterized protein OS=Chlorocebus sabaeus GN=TFRC PE=4 SV=1;sp|P02786|TFR1_HUMAN Transferrin receptor protein 1 OS=Homo sapiens GN=TFRC PE=1 SV=2
3916	P39023;G5E9G0;H7C422;A0A0D9SE18;A0A0D9SBE5;H7C3M2;B5MCW2	RPL3	60S ribosomal protein L3	18	18	43.4	46.108	403	83.869		1.02925	-0.157108	1.18636		1.21856	0.0598044	0.600906						18	13	15	11	12	11	9	7	9	12795000000		29.4891	29.7386	28.6785	27.8048	28.4763	28.5374	28.7008	28.5165	31.1603		sp|P39023|RL3_HUMAN 60S ribosomal protein L3 OS=Homo sapiens GN=RPL3 PE=1 SV=2;tr|G5E9G0|G5E9G0_HUMAN 60S ribosomal protein L3 OS=Homo sapiens GN=RPL3 PE=1 SV=1;tr|H7C422|H7C422_HUMAN 60S ribosomal protein L3 (Fragment) OS=Homo sapiens GN=RPL3 PE=1 SV=1;tr
1666	A0A0D9RHD6;P20618	PSMB1	Proteasome subunit beta type-1	9	9	53.9	26.499	241	148.67		-2.31586	-2.49504	0.179183		0.645695	0.699043	0.274435						7	9	6	5	7	8	3	4	1	12750000000		27.9453	NaN	28.6435	29.1271	28.7095	29.1929	29.5549	29.1979	28.8143		tr|A0A0D9RHD6|A0A0D9RHD6_CHLSB Proteasome subunit beta type OS=Chlorocebus sabaeus GN=PSMB1 PE=3 SV=1;sp|P20618|PSB1_HUMAN Proteasome subunit beta type-1 OS=Homo sapiens GN=PSMB1 PE=1 SV=2
3950	P52565;J3KTF8;J3QQX2;A0A0D9S4M8;J3KRY1;P52565-2;J3KRE2	ARHGDIA	Rho GDP-dissociation inhibitor 1	18	18	83.3	23.207	204	218.59		-2.12936	-4.87946	2.75011		1.61478	3.28145	2.40546	+	+	+_+			12	16	16	8	11	11	2	2	2	12608000000		24.8881	24.5368	25.9882	27.9413	26.5072	27.3527	29.6352	30.2824	30.1339		sp|P52565|GDIR1_HUMAN Rho GDP-dissociation inhibitor 1 OS=Homo sapiens GN=ARHGDIA PE=1 SV=3;tr|J3KTF8|J3KTF8_HUMAN Rho GDP-dissociation inhibitor 1 (Fragment) OS=Homo sapiens GN=ARHGDIA PE=1 SV=8;tr|J3QQX2|J3QQX2_HUMAN Rho GDP-dissociation inhibitor 1 OS=H
3122	A0A0D9S5Z6;O75396	SEC22B	Vesicle-trafficking protein SEC22b	14	14	63.7	24.74	215	259.21		-2.04683	-1.82861	-0.218223		3.21363	2.18386	0.267806	+	+	+_+			13	14	14	14	14	13	9	9	9	12494000000		26.7523	27.2959	27.2595	28.9965	29.0796	29.3721	29.1516	29.3142	28.3278		tr|A0A0D9S5Z6|A0A0D9S5Z6_CHLSB Uncharacterized protein OS=Chlorocebus sabaeus GN=SEC22B PE=3 SV=1;sp|O75396|SC22B_HUMAN Vesicle-trafficking protein SEC22b OS=Homo sapiens GN=SEC22B PE=1 SV=4
1797	A0A0D9RJC0;P17987;E7ERF2;E7EQR6;F5H282	TCP1	T-complex protein 1 subunit alpha	32	32	75.4	60.271	556	215.33		-0.237259	-0.0664965	-0.170762		2.27298	0.276733	0.850721						27	27	27	24	24	27	22	21	19	12466000000		28.9556	28.8799	29.0006	29.2175	29.1344	29.1959	29.1169	29.0857	28.833		tr|A0A0D9RJC0|A0A0D9RJC0_CHLSB Uncharacterized protein OS=Chlorocebus sabaeus GN=TCP1 PE=3 SV=1;sp|P17987|TCPA_HUMAN T-complex protein 1 subunit alpha OS=Homo sapiens GN=TCP1 PE=1 SV=1;tr|E7ERF2|E7ERF2_HUMAN T-complex protein 1 subunit alpha OS=Homo sapien
3951	P52597	HNRNPF	Heterogeneous nuclear ribonucleoprotein F;Heterogeneous nuclear ribonucleoprotein F, N-terminally processed	22	18	70.8	45.671	415	229.26		1.13242	0.770339	0.362076		1.6114	0.864062	0.551599						15	13	13	11	11	13	10	12	10	12423000000		29.905	30.4187	29.3484	28.6977	28.9347	28.6425	28.6148	29.1793	29.567		sp|P52597|HNRPF_HUMAN Heterogeneous nuclear ribonucleoprotein F OS=Homo sapiens GN=HNRNPF PE=1 SV=3
4010	P81605;A0A0D9QZ87;P81605-2	DCD	Dermcidin;Survival-promoting peptide;DCD-1	4	4	32.7	11.284	110	7.6625		1.42722	1.90449	-0.477269		1.1099	2.37937	0.372023		+				2	4	4	3	3	3	3	3	3	12413000000		29.9188	30.2083	30.9325	29.8735	28.8409	28.0636	28.5381	28.2147	28.5934		sp|P81605|DCD_HUMAN Dermcidin - Homo sapiens (Human).;tr|A0A0D9QZ87|A0A0D9QZ87_CHLSB Uncharacterized protein OS=Chlorocebus sabaeus GN=DCD PE=4 SV=1;sp|P81605-2|DCD_HUMAN Isoform 2 of Dermcidin OS=Homo sapiens GN=DCD
1000	A0A0D9R6T9	DNPEP	Uncharacterized protein	23	7	64.8	51.977	471	199.79		1.64477	1.6262	0.0185731		2.15596	1.97225	0.0242243	+					4	5	5	5	5	4	7	7	7	11597000000		29.6887	30.4416	30.639	28.7559	28.7515	28.3276	28.9314	28.742	28.2173		tr|A0A0D9R6T9|A0A0D9R6T9_CHLSB Uncharacterized protein OS=Chlorocebus sabaeus GN=DNPEP PE=3 SV=1
3206	A0A0D9S7F9	PRDX1	Uncharacterized protein	25	5	88.4	22.15	199	323.31		2.0259	1.16723	0.858663		1.26479	2.35767	0.519238						5	5	5	5	5	5	5	5	5	11591000000		29.7442	30.4163	30.1915	29.4223	26.9267	27.9254	28.9648	29.0076	28.8779		tr|A0A0D9S7F9|A0A0D9S7F9_CHLSB Uncharacterized protein OS=Chlorocebus sabaeus GN=PRDX1 PE=4 SV=1
3313	A0A0D9S8X5		Uncharacterized protein	29	14	71.6	45.56	405	323.31		-4.51027	-4.45274	-0.0575307		2.83161	2.94694	0.0678017	+	+	+_+			12	13	13	14	13	12	2	3	4	11547000000		24.4122	25.6499	23.9119	28.6704	29.2669	29.5674	29.2068	29.2814	28.8439		tr|A0A0D9S8X5|A0A0D9S8X5_CHLSB Uncharacterized protein OS=Chlorocebus sabaeus PE=4 SV=1
2079	A0A0D9RNR3;Q9UBS4	DNAJB11	DnaJ homolog subfamily B member 11	15	15	46.6	40.513	358	166.91		1.00893	1.22268	-0.213747		1.90974	1.54064	0.304535						11	14	12	14	12	12	14	14	14	11515000000		29.9193	30.216	29.425	28.8267	28.8019	28.9049	29.0613	28.7365	28.0946		tr|A0A0D9RNR3|A0A0D9RNR3_CHLSB Uncharacterized protein OS=Chlorocebus sabaeus GN=DNAJB11 PE=4 SV=1;sp|Q9UBS4|DJB11_HUMAN DnaJ homolog subfamily B member 11 OS=Homo sapiens GN=DNAJB11 PE=1 SV=1
1049	A0A0D9R7I5;Q9Y3F4;Q9Y3F4-2	STRAP	Serine-threonine kinase receptor-associated protein	17	17	54	38.468	350	216.53		-1.15726	-0.911437	-0.245819		2.92219	0.975855	0.22698						15	15	16	14	14	14	13	11	10	11238000000		27.8963	28.1139	27.6769	28.9476	29.0466	29.1646	29.1972	29.2546	27.9696		tr|A0A0D9R7I5|A0A0D9R7I5_CHLSB Uncharacterized protein OS=Chlorocebus sabaeus GN=STRAP PE=4 SV=1;sp|Q9Y3F4|STRAP_HUMAN Serine-threonine kinase receptor-associated protein OS=Homo sapiens GN=STRAP PE=1 SV=1;sp|Q9Y3F4-2|STRAP_HUMAN Isoform 2 of Serine-threon
1128	A0A0D9R8Q2;P40939	HADHA	Trifunctional enzyme subunit alpha, mitochondrial;Long-chain enoyl-CoA hydratase;Long chain 3-hydroxyacyl-CoA dehydrogenase	32	32	49.4	83.079	763	315.16		-1.93806	-1.82756	-0.110495		3.91602	3.23575	0.275127	+	+	+_+			28	29	29	28	27	29	8	9	8	10938000000		27.2173	26.9061	27.2629	28.9463	29.1803	29.074	28.7447	28.8871	29.2372		tr|A0A0D9R8Q2|A0A0D9R8Q2_CHLSB Uncharacterized protein OS=Chlorocebus sabaeus GN=HADHA PE=3 SV=1;sp|P40939|ECHA_HUMAN Trifunctional enzyme subunit alpha, mitochondrial OS=Homo sapiens GN=HADHA PE=1 SV=2
2009	A0A0D9RMJ8;P04844;P04844-2	RPN2	Dolichyl-diphosphooligosaccharide--protein glycosyltransferase subunit 2	24	24	53.2	69.314	631	323.31		-2.84496	-2.478	-0.366961		3.17416	2.70132	0.904673	+	+	+_+			20	23	23	24	21	23	7	7	6	10872000000		26.1675	25.9357	26.9076	29.0959	29.1735	29.2761	29.0712	28.9105	28.4631		tr|A0A0D9RMJ8|A0A0D9RMJ8_CHLSB Uncharacterized protein OS=Chlorocebus sabaeus GN=RPN2 PE=4 SV=1;sp|P04844|RPN2_HUMAN Dolichyl-diphosphooligosaccharide--protein glycosyltransferase subunit 2 OS=Homo sapiens GN=RPN2 PE=1 SV=3;sp|P04844-2|RPN2_HUMAN Isoform 2
2417	A0A0D9RTZ7	IPO4	Uncharacterized protein	41	14	50.5	113.11	1033	323.31		-6.89035	-6.31822	-0.572126		3.9714	3.86551	1.26074	+	+	+_+			13	12	13	12	12	13	0	0	0	10810000000		NaN	NaN	NaN	29.4522	28.9654	29.4745	28.7226	28.9574	28.4957		tr|A0A0D9RTZ7|A0A0D9RTZ7_CHLSB Uncharacterized protein OS=Chlorocebus sabaeus GN=IPO4 PE=4 SV=1
2825	A0A0D9S0X5	SLC25A3	Uncharacterized protein	23	2	70.1	40.01	361	162.09		-5.97921	-5.36386	-0.615346		2.42935	2.30943	0.195506	+	+	+_+			2	2	2	2	2	2	1	1	1	10760000000		NaN	NaN	NaN	27.2249	29.3763	30.1398	29.2839	28.9764	26.6348		tr|A0A0D9S0X5|A0A0D9S0X5_CHLSB Uncharacterized protein OS=Chlorocebus sabaeus GN=SLC25A3 PE=3 SV=1
167	A0A0D9S8C1;A0A0C4DGS1;P39656-3;P39656;P39656-2;U3KQ84	DDOST	Dolichyl-diphosphooligosaccharide--protein glycosyltransferase 48 kDa subunit	14	14	47.6	48.829	439	250.91		-1.99355	-2.04389	0.0503362		3.11426	3.09844	0.295486	+	+	+_+			13	13	13	12	12	14	11	6	8	10735000000		26.7191	27.1234	27.4612	29.0524	29.1444	29.0876	29.2692	29.0585	29.1077		tr|A0A0D9S8C1|A0A0D9S8C1_CHLSB Dolichyl-diphosphooligosaccharide--protein glycosyltransferase 48 kDa subunit OS=Chlorocebus sabaeus GN=DDOST PE=3 SV=1;tr|A0A0C4DGS1|A0A0C4DGS1_HUMAN Dolichyl-diphosphooligosaccharide--protein glycosyltransferase 48 kDa subu
4094	Q3ZCQ8;Q3ZCQ8-2;Q3ZCQ8-3;M0R2F8;M0R0C3;M0R003	TIMM50	Mitochondrial import inner membrane translocase subunit TIM50	12	12	39.4	39.646	353	281.2		-0.947081	-0.690369	-0.256712		1.37923	0.952418	0.573437						10	12	10	11	11	11	7	8	7	10695000000		28.2096	28.6637	27.6323	28.9747	29.0246	29.3476	28.8522	29.1416	28.5829		sp|Q3ZCQ8|TIM50_HUMAN Mitochondrial import inner membrane translocase subunit TIM50 OS=Homo sapiens GN=TIMM50 PE=1 SV=2;sp|Q3ZCQ8-2|TIM50_HUMAN Isoform 2 of Mitochondrial import inner membrane translocase subunit TIM50 OS=Homo sapiens GN=TIMM50;sp|Q3ZCQ8-3
3214	A0A0D9S7K0;P11166	SLC2A1	Solute carrier family 2, facilitated glucose transporter member 1	11	10	16.8	45.856	416	323.31		-1.83618	-1.76925	-0.0669346		3.81524	3.30178	0.124524	+	+	+_+			8	9	9	9	9	9	5	5	4	10671000000		27.0366	26.8755	27.0861	28.6052	28.9562	28.9453	28.8652	28.9834	28.4573		tr|A0A0D9S7K0|A0A0D9S7K0_CHLSB Uncharacterized protein OS=Chlorocebus sabaeus GN=SLC2A1 PE=3 SV=1;sp|P11166|GTR1_HUMAN Solute carrier family 2, facilitated glucose transporter member 1 OS=Homo sapiens GN=SLC2A1 PE=1 SV=2
488	F8W6I7;A0A0D9QZF1;P09651-3;P09651-2;P09651;F8VZ49;Q32P51;F8VTQ5	HNRNPA1;HNRNPA1L2	Heterogeneous nuclear ribonucleoprotein A1;Heterogeneous nuclear ribonucleoprotein A1, N-terminally processed;Heterogeneous nuclear ribonucleoprotein A1-like 2	25	22	61.6	33.155	307	323.31	6	0.75831	-0.82412	1.58243		1.60258	0.183538	0.392412						22	7	5	7	7	8	6	6	6	10644000000		27.1985	26.8823	27.5745	26.3929	26.361	26.6264	26.1474	26.5457	31.4346		tr|F8W6I7|F8W6I7_HUMAN Heterogeneous nuclear ribonucleoprotein A1 OS=Homo sapiens GN=HNRNPA1 PE=1 SV=2;tr|A0A0D9QZF1|A0A0D9QZF1_CHLSB Uncharacterized protein OS=Chlorocebus sabaeus GN=HNRNPA1 PE=4 SV=1;sp|P09651-3|ROA1_HUMAN Isoform 2 of Heterogeneous nucl
1922	A0A0D9RL76;Q9UBN7;Q9UBN7-2	HDAC6	Histone deacetylase 6	25	25	32.3	131.34	1215	247.48		0.992484	1.33528	-0.342793		1.10502	1.00946	0.192578						13	19	17	20	16	15	19	19	21	10582000000		29.8061	30.3447	29.6029	28.2152	29.3798	29.1813	29.4266	28.8496	27.4717		tr|A0A0D9RL76|A0A0D9RL76_CHLSB Uncharacterized protein OS=Chlorocebus sabaeus GN=HDAC6 PE=4 SV=1;sp|Q9UBN7|HDAC6_HUMAN Histone deacetylase 6 OS=Homo sapiens GN=HDAC6 PE=1 SV=2;sp|Q9UBN7-2|HDAC6_HUMAN Isoform 2 of Histone deacetylase 6 OS=Homo sapiens GN=HD
3352	A0A0D9SAA0	HIST2H2AA3;HIST1H2AJ;HIST1H2AH;HIST2H2AC;HIST1H2AC;HIST3H2A;HIST1H2AD;HIST1H2AG;HIST1H2AB;H2AFJ;HIST1H2AA;H2AFX	Histone H2A type 2-A;Histone H2A type 1-J;Histone H2A type 1-H;Histone H2A type 2-C;Histone H2A type 1-C;Histone H2A type 3;Histone H2A type 1-D;Histone H2A type 1;Histone H2A type 1-B/E;Histone H2A.J;Histone H2A;Histone H2A type 1-A;Histone H2AX	8	5	60	14.095	130	84.505		1.54732	-0.0491664	1.59649		0.95632	0.00726646	0.297489						5	2	2	2	2	2	2	2	2	10440000000		28.4033	26.3964	26.7321	24.7679	25.9704	26.1514	25.3099	24.8826	31.4867		tr|A0A0D9SAA0|A0A0D9SAA0_CHLSB Histone H2A OS=Chlorocebus sabaeus GN=HIST2H2AA4 PE=3 SV=1;sp|Q6FI13|H2A2A_HUMAN Histone H2A type 2-A OS=Homo sapiens GN=HI
772	A0A0D9R3H4;P51571;A6NLM8	SSR4	Translocon-associated protein subunit delta	7	7	36.5	20.008	181	54.41		-0.3601	-0.0224349	-0.337665		1.00839	0.0227948	0.430861						6	5	6	5	7	7	6	6	7	10412000000		28.7331	28.7659	28.4237	29.1062	28.7477	29.1491	28.9701	28.9769	28.0431		tr|A0A0D9R3H4|A0A0D9R3H4_CHLSB Uncharacterized protein OS=Chlorocebus sabaeus GN=SSR4 PE=4 SV=1;sp|P51571|SSRD_HUMAN Translocon-associated protein subunit delta OS=Homo sapiens GN=SSR4 PE=1 SV=1;tr|A6NLM8|A6NLM8_HUMAN Translocon-associated protein subunit
1586	A0A0D9RG78;P05556;P05556-2;P05556-5;P05556-4;P05556-3	ITGB1	Integrin beta-1	25	25	30.6	88.401	798	179.88		-2.024	-1.66788	-0.356116		2.93392	2.23523	0.773327	+	+	+_+			21	22	23	21	21	24	10	9	9	10347000000		26.7983	26.9307	27.5632	28.9934	29.1742	29.1966	28.9596	28.9752	28.3611		tr|A0A0D9RG78|A0A0D9RG78_CHLSB Integrin beta OS=Chlorocebus sabaeus GN=ITGB1 PE=3 SV=1;sp|P05556|ITB1_HUMAN Integrin beta-1 OS=Homo sapiens GN=ITGB1 PE=1 SV=2;sp|P05556-2|ITB1_HUMAN Isoform 2 of Integrin beta-1 OS=Homo sapiens GN=ITGB1;sp|P05556-5|ITB1_HUM
3066	A0A0D9S508;MAU004;V9GYM8;Q92974-3;Q92974-2;Q92974	ARHGEF2	Rho guanine nucleotide exchange factor 2	58	41	61.6	110.8	978	323.31	924	-4.73623	-4.92968	0.193445		1.58206	1.66655	0.222405	+	+	+_+			36	35	36	30	29	32	2	1	0	10333000000		NaN	NaN	26.7146	29.4102	28.4156	28.5574	29.2608	28.8328	28.87		tr|A0A0D9S508|A0A0D9S508_CHLSB Uncharacterized protein OS=Chlorocebus sabaeus GN=ARHGEF2 PE=4 SV=1;in|MAU004|MAU004_R17 GEFH1 Rho guanine nucleotide exchange factor2 (Q92974) related to project MAU_R17_160813;tr|V9GYM8|V9GYM8_HUMAN Rho guanine nucleotide e
3139	M0R0F0;A0A0D9S6D9;P46782;M0R0R2;M0QZN2	RPS5	40S ribosomal protein S5;40S ribosomal protein S5, N-terminally processed	13	13	71.5	22.391	200	166.84		-1.64137	-1.68462	0.043251		1.74401	3.91931	0.0353058	+	+	+_+			13	9	9	8	11	10	5	7	6	10269000000		27.3766	27.2095	27.0203	28.0209	29.287	29.2225	28.9805	28.8587	28.821		tr|M0R0F0|M0R0F0_HUMAN 40S ribosomal protein S5 (Fragment) OS=Homo sapiens GN=RPS5 PE=1 SV=1;tr|A0A0D9S6D9|A0A0D9S6D9_CHLSB Uncharacterized protein OS=Chlorocebus sabaeus PE=3 SV=1;sp|P46782|RS5_HUMAN 40S ribosomal protein S5 OS=Homo sapiens GN=RPS5 PE=1 S
1004	A0A0D9R6X5;P68366-2;P68366	TUBA4A	Tubulin alpha-4A chain	32	6	65	49.924	448	52.831		-1.0084	-0.449037	-0.559363		1.4376	0.575924	1.56442						6	5	5	6	6	5	4	6	5	10244000000		28.2713	28.6408	27.5633	29.0314	29.1598	29.3094	28.7469	28.7552	28.3205		tr|A0A0D9R6X5|A0A0D9R6X5_CHLSB Tubulin alpha chain OS=Chlorocebus sabaeus GN=TUBA4A PE=3 SV=1;sp|P68366-2|TBA4A_HUMAN Isoform 2 of Tubulin alpha-4A chain OS=Homo sapiens GN=TUBA4A;sp|P68366|TBA4A_HUMAN Tubulin alpha-4A chain OS=Homo sapiens GN=TUBA4A PE=1
1886	A0A0D9RKR0;O15056-2;O15056;O15056-3	SYNJ2	Synaptojanin-2	45	45	39.8	165.1	1496	225.66		-6.67296	-6.01069	-0.66227		4.76629	4.37982	1.68013	+	+	+_+			30	34	36	35	36	38	2	2	1	10042000000		NaN	NaN	NaN	29.4823	29.2703	29.2395	28.8185	28.8421	28.3446		tr|A0A0D9RKR0|A0A0D9RKR0_CHLSB Uncharacterized protein OS=Chlorocebus sabaeus GN=SYNJ2 PE=4 SV=1;sp|O15056-2|SYNJ2_HUMAN Isoform 2B1 of Synaptojanin-2 OS=Homo sapiens GN=SYNJ2;sp|O15056|SYNJ2_HUMAN Synaptojanin-2 OS=Homo sapiens GN=SYNJ2 PE=1 SV=3;sp|O1505
2153	A0A0D9RPV9;O00471;A0A0A0MSI8;F8W9B8	EXOC5	Exocyst complex component 5	32	32	57.8	81.866	708	207.35		-5.61236	-5.08264	-0.529724		1.88425	1.73217	0.733242	+	+	+_+			29	27	27	29	26	29	2	1	0	9995500000		NaN	NaN	26.1659	29.6015	28.9995	28.9389	28.9841	28.8165	28.1502		tr|A0A0D9RPV9|A0A0D9RPV9_CHLSB Uncharacterized protein OS=Chlorocebus sabaeus GN=EXOC5 PE=4 SV=1;sp|O00471|EXOC5_HUMAN Exocyst complex component 5 OS=Homo sapiens GN=EXOC5 PE=1 SV=1;tr|A0A0A0MSI8|A0A0A0MSI8_HUMAN Exocyst complex component 5 OS=Homo sapiens
717	A0A0D9R2P2;O14787-2;O14787;A0A075B780	TNPO2	Transportin-2	43	31	65.4	100.41	887	323.31		-7.16891	-6.57876	-0.590152		4.58797	4.40725	1.37696	+	+	+_+			23	28	27	23	25	28	2	1	1	9986400000		NaN	NaN	NaN	29.4696	29.0393	29.1042	28.7965	28.7263	28.3198		tr|A0A0D9R2P2|A0A0D9R2P2_CHLSB Uncharacterized protein OS=Chlorocebus sabaeus GN=TNPO2 PE=4 SV=1;sp|O14787-2|TNPO2_HUMAN Isoform 2 of Transportin-2 OS=Homo sapiens GN=TNPO2;sp|O14787|TNPO2_HUMAN Transportin-2 OS=Homo sapiens GN=TNPO2 PE=1 SV=3;tr|A0A075B78
2854	A0A0D9S1G6;P61247;D6RG13;D6RAT0;D6RB09;E9PFI5;H0Y9Y4;H0Y8L7;D6R9B6	RPS3A	40S ribosomal protein S3a	14	14	53.4	29.945	264	122.67		-0.00271289	-0.671623	0.66891		0.00364119	0.481414	0.514208						14	10	10	10	11	11	9	8	10	9899300000		28.5372	28.3846	27.7983	28.0573	28.3486	28.3224	28.2094	28.5009	30.0247		tr|A0A0D9S1G6|A0A0D9S1G6_CHLSB 40S ribosomal protein S3a OS=Chlorocebus sabaeus GN=RPS3A PE=3 SV=1;sp|P61247|RS3A_HUMAN 40S ribosomal protein S3a OS=Homo sapiens GN=RPS3A PE=1 SV=2;tr|D6RG13|D6RG13_HUMAN 40S ribosomal protein S3a (Fragment) OS=Homo sapiens
3233	A0A0D9S7U2;P23246;P23246-2	SFPQ	Splicing factor, proline- and glutamine-rich	31	29	46.6	76.204	708	323.31		0.127961	-1.51186	1.63982		0.0424591	0.18676	0.215531						29	9	3	4	6	14	5	4	3	9820600000		25.6532	22.4234	24.8079	24.6863	23.511	24.3034	21.6623	24.2737	31.4841		tr|A0A0D9S7U2|A0A0D9S7U2_CHLSB Uncharacterized protein OS=Chlorocebus sabaeus GN=SFPQ PE=4 SV=1;sp|P23246|SFPQ_HUMAN Splicing factor, proline- and glutamine-rich OS=Homo sapiens GN=SFPQ PE=1 SV=2;sp|P23246-2|SFPQ_HUMAN Isoform Short of Splicing factor, pro
3437	A0A0D9SDL0;Q15365	PCBP1	Poly(rC)-binding protein 1	19	14	84.8	37.497	356	323.31		1.02455	0.899263	0.12529		1.95213	1.72869	0.424152						14	12	12	12	11	13	10	11	10	9803400000		29.0043	29.7432	29.4447	28.2277	28.5114	28.3794	28.6866	28.3744	28.4334		tr|A0A0D9SDL0|A0A0D9SDL0_CHLSB Uncharacterized protein OS=Chlorocebus sabaeus GN=PCBP1 PE=4 SV=1;sp|Q15365|PCBP1_HUMAN Poly(rC)-binding protein 1 OS=Homo sapiens GN=PCBP1 PE=1 SV=2
2441	A0A0D9RUB2;Q9H7D0	DOCK5	Dedicator of cytokinesis protein 5	51	49	35.6	215.33	1870	246.46		-6.84763	-6.74237	-0.105252		5.69447	5.39201	0.283204	+	+	+_+			37	44	43	38	39	44	1	1	1	9740800000		NaN	NaN	NaN	28.8393	29.11	28.9699	29.0806	28.8838	28.639		tr|A0A0D9RUB2|A0A0D9RUB2_CHLSB Uncharacterized protein OS=Chlorocebus sabaeus GN=DOCK5 PE=3 SV=1;sp|Q9H7D0|DOCK5_HUMAN Dedicator of cytokinesis protein 5 OS=Homo sapiens GN=DOCK5 PE=1 SV=3
1591	A0A0D9RG93	HSPD1	Uncharacterized protein	47	5	67.3	63.478	596	323.31		-0.798019	-0.487992	-0.310027		1.46267	0.424909	0.250577						4	5	5	5	5	5	3	4	5	9714600000		28.1631	28.5807	27.9754	28.7385	29.0165	29.3582	29.141	29.226	27.816		tr|A0A0D9RG93|A0A0D9RG93_CHLSB Uncharacterized protein OS=Chlorocebus sabaeus GN=HSPD1 PE=3 SV=1
3990	P62937;A0A0D9RT22;A0A0D9RMD9;F8WE65;C9J5S7;P62937-2	PPIA	Peptidyl-prolyl cis-trans isomerase A;Peptidyl-prolyl cis-trans isomerase A, N-terminally processed;Peptidyl-prolyl cis-trans isomerase	14	10	81.8	18.012	165	183.44	5	2.31245	2.1557	0.156756		3.13965	2.86374	0.359903	+	+	+_+			9	9	9	9	9	9	10	9	10	9696200000		30.1769	29.9296	30.6958	27.7686	27.9842	28.1121	28.4082	27.9102	28.0167		sp|P62937|PPIA_HUMAN Peptidyl-prolyl cis-trans isomerase A OS=Homo sapiens GN=PPIA PE=1 SV=2;tr|A0A0D9RT22|A0A0D9RT22_CHLSB Peptidyl-prolyl cis-trans isomerase OS=Chlorocebus sabaeus PE=3 SV=1;tr|A0A0D9RMD9|A0A0D9RMD9_CHLSB Peptidyl-prolyl cis-trans isomer
1444	A0A0D9RDT3	NCAPD2	Condensin complex subunit 1	63	23	54.3	157.16	1399	323.31		-5.17523	-4.64939	-0.525833		3.27187	2.58053	0.281785	+	+	+_+			17	19	22	20	19	19	2	2	1	9581300000		24.2857	NaN	23.877	29.6747	29.013	28.2483	28.0189	29.6912	27.6483		tr|A0A0D9RDT3|A0A0D9RDT3_CHLSB Condensin complex subunit 1 OS=Chlorocebus sabaeus GN=NCAPD2 PE=3 SV=1
3899	P31947;A0A0D9S918;P31947-2	SFN	14-3-3 protein sigma	16	13	64.5	27.774	248	154.81		5.13146	2.5731	2.55836		0.816336	0.500805	0.310684	+					2	1	2	1	1	2	2	13	2	9576900000		30.9784	27.4035	28.5911	29.2124	NaN	NaN	28.0571	NaN	28.7273		sp|P31947|1433S_HUMAN 14-3-3 protein sigma OS=Homo sapiens GN=SFN PE=1 SV=1;tr|A0A0D9S918|A0A0D9S918_CHLSB Uncharacterized protein OS=Chlorocebus sabaeus GN=SFN PE=3 SV=1;sp|P31947-2|1433S_HUMAN Isoform 2 of 14-3-3 protein sigma OS=Homo sapiens GN=SFN
4016	Q00839;A0A0D9RA32;Q00839-2;NIM039;NIM038	HNRNPU	Heterogeneous nuclear ribonucleoprotein U	31	31	43	90.583	825	323.31		-0.909487	-2.61605	1.70657		1.10348	0.514902	0.317679						31	9	7	10	8	9	6	6	4	9543000000		25.1495	23.8626	24.4298	25.4967	25.4984	25.1753	24.3523	25.4967	31.4411		sp|Q00839|HNRPU_HUMAN Heterogeneous nuclear ribonucleoprotein U OS=Homo sapiens GN=HNRNPU PE=1 SV=6;tr|A0A0D9RA32|A0A0D9RA32_CHLSB Uncharacterized protein OS=Chlorocebus sabaeus GN=HNRNPU PE=4 SV=1;sp|Q00839-2|HNRPU_HUMAN Isoform Short of Heterogeneous nuc
1401	A0A0D9RD74;Q9Y6N5	SQRDL	Sulfide:quinone oxidoreductase, mitochondrial	27	27	65.8	49.915	450	323.31		-0.594355	-0.400768	-0.193586		1.50345	0.682089	0.4151						23	26	22	25	25	24	10	9	10	9490600000		28.0453	28.4596	27.8454	28.7586	28.7096	28.6651	28.8256	28.575	28.1519		tr|A0A0D9RD74|A0A0D9RD74_CHLSB Uncharacterized protein OS=Chlorocebus sabaeus PE=4 SV=1;sp|Q9Y6N5|SQRD_HUMAN Sulfide:quinone oxidoreductase, mitochondrial OS=Homo sapiens GN=SQRDL PE=1 SV=1
775	A0A0D9R3J7;P51572;P51572-2;C9JSP1;C9JQ75;C9J0M4	BCAP31	B-cell receptor-associated protein 31	17	17	50.5	25.334	222	98.896		-2.27243	-2.19684	-0.075592		2.64286	2.62875	0.299634	+	+	+_+			12	9	15	13	15	10	7	7	6	9479500000		26.5852	26.1917	27.272	28.8053	29.1127	28.9482	28.7788	28.9442	28.9164		tr|A0A0D9R3J7|A0A0D9R3J7_CHLSB Uncharacterized protein OS=Chlorocebus sabaeus GN=BCAP31 PE=4 SV=1;sp|P51572|BAP31_HUMAN B-cell receptor-associated protein 31 OS=Homo sapiens GN=BCAP31 PE=1 SV=3;sp|P51572-2|BAP31_HUMAN Isoform 2 of B-cell receptor-associate
242	J3KTA4;A0A0D9QVI6;P17844;P17844-2	DDX5	Probable ATP-dependent RNA helicase DDX5	37	27	56.2	69.086	614	323.31		0.213663	-1.40774	1.6214		0.294369	0.549528	0.665459						25	17	20	9	14	14	9	10	12	9476800000		27.7446	27.4184	26.8057	26.9406	27.0893	27.2979	27.6017	27.6604	30.9298		tr|J3KTA4|J3KTA4_HUMAN Probable ATP-dependent RNA helicase DDX5 OS=Homo sapiens GN=DDX5 PE=1 SV=1;tr|A0A0D9QVI6|A0A0D9QVI6_CHLSB Uncharacterized protein OS=Chlorocebus sabaeus GN=DDX5 PE=3 SV=1;sp|P17844|DDX5_HUMAN Probable ATP-dependent RNA helicase DDX5
612	A0A0D9R162;Q9HD45;Q5TB53	TM9SF3	Transmembrane 9 superfamily member 3	17	17	30.2	64.362	556	109.44		-3.32833	-2.93467	-0.393657		3.49974	3.11082	0.551549	+	+	+_+			15	15	13	12	11	15	4	5	3	9363700000		25.8984	25.2709	25.8745	28.6433	29.335	29.0506	28.8355	28.8837	28.1286		tr|A0A0D9R162|A0A0D9R162_CHLSB Transmembrane 9 superfamily member OS=Chlorocebus sabaeus GN=TM9SF3 PE=3 SV=1;sp|Q9HD45|TM9S3_HUMAN Transmembrane 9 superfamily member 3 OS=Homo sapiens GN=TM9SF3 PE=1 SV=2;tr|Q5TB53|Q5TB53_HUMAN Transmembrane 9 superfamily m
4022	Q02383	SEMG2	Semenogelin-2	31	22	62.7	65.444	582	323.31		-1.44736	5.0162	-6.46356		0.197294	1.26851	1.35542		+				1	0	0	2	20	20	13	2	4	9363300000		25.1483	24.954	30.428	30.5067	23.9364	30.4292	NaN	NaN	NaN		sp|Q02383|SEMG2_HUMAN Semenogelin-2 OS=Homo sapiens GN=SEMG2 PE=1 SV=1
2760	A0A0D9RZQ0;P12236	SLC25A6	ADP/ATP translocase 3;ADP/ATP translocase 3, N-terminally processed	30	9	74.2	32.866	298	34.497		-0.243838	0.116448	-0.360286		0.206585	0.161241	0.279227						9	9	8	9	8	8	5	5	5	9322600000		28.3593	28.5697	28.3118	27.7624	29.0331	29.1769	28.5208	28.5908	27.7798		tr|A0A0D9RZQ0|A0A0D9RZQ0_CHLSB Uncharacterized protein OS=Chlorocebus sabaeus GN=SLC25A6 PE=3 SV=1;sp|P12236|ADT3_HUMAN ADP/ATP translocase 3 OS=Homo sapiens GN=SLC25A6 PE=1 SV=4
1716	A0A0D9RI92;P49755;G3V2K7	TMED10	Transmembrane emp24 domain-containing protein 10	8	8	37	24.968	219	82.086		-2.56726	-1.92755	-0.639706		3.70256	2.82911	1.26239	+	+	+_+			7	8	7	8	7	8	3	3	3	9297400000		26.3745	26.3449	26.8024	28.8154	29.2051	29.2032	28.5828	28.6816	28.0402		tr|A0A0D9RI92|A0A0D9RI92_CHLSB Uncharacterized protein OS=Chlorocebus sabaeus GN=TMED10 PE=3 SV=1;sp|P49755|TMEDA_HUMAN Transmembrane emp24 domain-containing protein 10 OS=Homo sapiens GN=TMED10 PE=1 SV=2;tr|G3V2K7|G3V2K7_HUMAN Transmembrane emp24 domain-c
753	A0A0D9R360;P50402	EMD	Emerin	17	17	64	29.417	258	263.68		-3.29873	-3.07956	-0.219171		2.92157	2.63372	0.413379	+	+	+_+			16	15	15	17	16	15	5	3	2	9294100000		24.9691	25.6548	26.3333	28.822	29.0944	28.937	28.8892	28.9929	28.3139		tr|A0A0D9R360|A0A0D9R360_CHLSB Uncharacterized protein OS=Chlorocebus sabaeus GN=EMD PE=4 SV=1;sp|P50402|EMD_HUMAN Emerin OS=Homo sapiens GN=EMD PE=1 SV=1
3302	A0A0D9S8R1;Q99497;K7ELW0;K7EN27	PARK7	Protein deglycase DJ-1	13	13	73.5	19.905	189	84.086		2.03689	1.92482	0.112077		3.81971	2.6836	0.140506	+	+	+_+			10	10	11	12	10	11	10	10	10	9117000000		30.0951	30.2878	30.1188	27.9676	28.3925	28.0309	28.6009	28.3988	27.7275		tr|A0A0D9S8R1|A0A0D9S8R1_CHLSB Uncharacterized protein OS=Chlorocebus sabaeus GN=PARK7 PE=4 SV=1;sp|Q99497|PARK7_HUMAN Protein DJ-1 OS=Homo sapiens GN=PARK7 PE=1 SV=2;tr|K7ELW0|K7ELW0_HUMAN Protein deglycase DJ-1 OS=Homo sapiens GN=PARK7 PE=1 SV=1;tr|K7EN2
3072	A0A0D9S538;Q14232;F5H0D0	EIF2B1	Translation initiation factor eIF-2B subunit alpha	19	19	66.9	33.714	305	75.567		-4.97924	-4.67974	-0.299498		3.07962	2.7609	0.39244	+	+	+_+			13	16	16	16	17	16	3	4	4	8930400000		24.0944	22.9575	24.8325	28.93	28.8062	29.086	28.9538	28.9522	28.0177		tr|A0A0D9S538|A0A0D9S538_CHLSB Uncharacterized protein OS=Chlorocebus sabaeus GN=EIF2B1 PE=3 SV=1;sp|Q14232|EI2BA_HUMAN Translation initiation factor eIF-2B subunit alpha OS=Homo sapiens GN=EIF2B1 PE=1 SV=1;tr|F5H0D0|F5H0D0_HUMAN Translation initiation fac
2503	A0A0D9RVD8;Q9BPX3	NCAPG	Condensin complex subunit 3	34	34	41.3	114.48	1015	323.31	674	-4.73694	-4.37744	-0.359502		3.53314	2.89751	0.417236	+	+	+_+			18	29	29	30	28	31	5	4	5	8915500000		23.5272	24.9038	24.3229	28.9663	29.0595	28.939	28.7735	29.1761	27.9366		tr|A0A0D9RVD8|A0A0D9RVD8_CHLSB Uncharacterized protein OS=Chlorocebus sabaeus GN=NCAPG PE=4 SV=1;sp|Q9BPX3|CND3_HUMAN Condensin complex subunit 3 OS=Homo sapiens GN=NCAPG PE=1 SV=1
1153	A0A0D9R924	PLEC	Uncharacterized protein	276	48	62.5	523.32	4605	323.31		1.09547	-1.93776	3.03323		2.20669	0.218984	0.368294						48	5	3	4	4	3	1	0	0	8912800000		NaN	NaN	NaN	21.3022	21.7002	21.6044	20.8989	21.3592	31.4485		tr|A0A0D9R924|A0A0D9R924_CHLSB Uncharacterized protein OS=Chlorocebus sabaeus GN=PLEC PE=4 SV=1
326	A0A0D9QWX1;Q7Z3U7-5;Q7Z3U7-6	MON2	Protein MON2 homolog	57	7	40.2	189.75	1711	323.31		-6.6625	-6.10887	-0.553638		4.70694	3.96042	0.7965	+	+	+_+			6	5	6	5	5	6	0	0	0	8799500000		NaN	NaN	NaN	29.0424	29.2169	28.8525	28.6855	28.8782	27.8872		tr|A0A0D9QWX1|A0A0D9QWX1_CHLSB Uncharacterized protein OS=Chlorocebus sabaeus GN=MON2 PE=4 SV=1;sp|Q7Z3U7-5|MON2_HUMAN Isoform 5 of Protein MON2 homolog OS=Homo sapiens GN=MON2;sp|Q7Z3U7-6|MON2_HUMAN Isoform 6 of Protein MON2 homolog OS=Homo sapiens GN=MON
1820	A0A0D9RJS8;Q8IXB1;Q8IXB1-2	DNAJC10	DnaJ homolog subfamily C member 10	25	25	35.4	91.075	793	274.26		0.89009	1.15018	-0.260091		0.504557	0.710583	0.35683						13	18	15	18	19	16	13	19	23	8740100000		29.5924	30.494	28.0148	27.9606	28.8425	28.6278	28.3748	28.3526	27.9233		tr|A0A0D9RJS8|A0A0D9RJS8_CHLSB DnaJ homolog subfamily C member 10 OS=Chlorocebus sabaeus GN=DNAJC10 PE=4 SV=1;sp|Q8IXB1|DJC10_HUMAN DnaJ homolog subfamily C member 10 OS=Homo sapiens GN=DNAJC10 PE=1 SV=2;sp|Q8IXB1-2|DJC10_HUMAN Isoform 2 of DnaJ homolog su
3831	P08621;A0A0D9S347;P08621-2;P08621-3	SNRNP70	U1 small nuclear ribonucleoprotein 70 kDa	20	20	40	51.556	437	128.74		-5.62071	-6.07962	0.458909		4.28106	4.24052	0.689645	+	+	+_+			20	17	19	17	16	17	1	0	1	8715500000		NaN	NaN	NaN	28.1558	28.7211	28.7163	28.6857	28.8256	29.4586		sp|P08621|RU17_HUMAN U1 small nuclear ribonucleoprotein 70 kDa OS=Homo sapiens GN=SNRNP70 PE=1 SV=2;tr|A0A0D9S347|A0A0D9S347_CHLSB Uncharacterized protein OS=Chlorocebus sabaeus GN=SNRNP70 PE=4 SV=1;sp|P08621-2|RU17_HUMAN Isoform 2 of U1 small nuclear ribo
1539	A0A0D9RFF7;P62701;A0A0D9SDM5;A0A0D9S0E5;A0A0D9S0D6;Q8TD47	RPS4X;RPS4Y2	40S ribosomal protein S4, X isoform;40S ribosomal protein S4, Y isoform 2	16	16	55.9	29.594	263	94.107		0.242898	-0.62869	0.871588		0.326801	0.453157	0.71515						15	15	14	10	13	15	10	11	8	8701700000		28.5102	28.2873	27.6276	27.5944	28.0468	28.0552	28.3409	28.1349	29.8354		tr|A0A0D9RFF7|A0A0D9RFF7_CHLSB 40S ribosomal protein S4 OS=Chlorocebus sabaeus PE=3 SV=1;sp|P62701|RS4X_HUMAN 40S ribosomal protein S4, X isoform OS=Homo sapiens GN=RPS4X PE=1 SV=2;tr|A0A0D9SDM5|A0A0D9SDM5_CHLSB 40S ribosomal protein S4 OS=Chlorocebus saba
1925	A0A0D9RL96;Q9H900	ZWILCH	Protein zwilch homolog	23	23	47.5	67.039	591	269.85		-5.6339	-5.81358	0.179684		4.85921	4.27858	0.248031	+	+	+_+			18	19	21	18	21	21	2	2	2	8683300000		22.9398	23.3305	22.701	28.7549	28.3815	28.7365	29.0647	29.0627	28.2845		tr|A0A0D9RL96|A0A0D9RL96_CHLSB Uncharacterized protein OS=Chlorocebus sabaeus GN=ZWILCH PE=4 SV=1;sp|Q9H900|ZWILC_HUMAN Protein zwilch homolog OS=Homo sapiens GN=ZWILCH PE=1 SV=2
2962	A0A0D9S3A2;Q8IZ07;H0YIN8	ANKRD13A	Ankyrin repeat domain-containing protein 13A	21	20	45.3	67.582	590	313.05		-4.98993	-5.48386	0.493934		3.06282	3.17945	0.942342	+	+	+_+			19	20	19	16	15	19	1	0	0	8552600000		NaN	NaN	NaN	28.6536	28.5051	28.1514	29.2311	28.9949	28.5658		tr|A0A0D9S3A2|A0A0D9S3A2_CHLSB Uncharacterized protein OS=Chlorocebus sabaeus GN=ANKRD13A PE=4 SV=1;sp|Q8IZ07|AN13A_HUMAN Ankyrin repeat domain-containing protein 13A OS=Homo sapiens GN=ANKRD13A PE=1 SV=3;tr|H0YIN8|H0YIN8_HUMAN Ankyrin repeat domain-contai
440	A0A0D9QYT4;P26006;P26006-1	ITGA3	Integrin alpha-3;Integrin alpha-3 heavy chain;Integrin alpha-3 light chain	17	17	18.8	116.31	1049	120.39		-5.84526	-5.88425	0.0389837		3.06498	3.05073	0.0677904	+	+	+_+			15	16	15	13	12	16	4	0	0	8536700000		NaN	NaN	24.1437	28.9055	28.5121	28.7868	28.6611	29.0959	28.5644		tr|A0A0D9QYT4|A0A0D9QYT4_CHLSB Uncharacterized protein OS=Chlorocebus sabaeus GN=ITGA3 PE=3 SV=1;sp|P26006|ITA3_HUMAN Integrin alpha-3 OS=Homo sapiens GN=ITGA3 PE=1 SV=5;sp|P26006-1|ITA3_HUMAN Isoform 2 of Integrin alpha-3 OS=Homo sapiens GN=ITGA3
195	A0A0D9QUW2;P22087;M0QXL5;M0R2Q4;M0R299;M0R0P1;M0R2U2;M0R1H0;M0R2B0	FBL	rRNA 2-O-methyltransferase fibrillarin	19	17	56.9	33.427	318	105.86		0.183973	-0.878729	1.0627		0.147895	0.862826	1.32719						15	14	12	12	11	10	10	13	12	8509900000		28.2789	28.6049	27.3184	27.4111	28.2881	27.951	28.7057	28.6394	29.4933		tr|A0A0D9QUW2|A0A0D9QUW2_CHLSB Uncharacterized protein OS=Chlorocebus sabaeus GN=FBL PE=3 SV=1;sp|P22087|FBRL_HUMAN rRNA 2-O-methyltransferase fibrillarin OS=Homo sapiens GN=FBL PE=1 SV=2;tr|M0QXL5|M0QXL5_HUMAN rRNA 2-O-methyltransferase fibrillarin (Fra
390	A0A0D9QY09;O15031	PLXNB2	Plexin-B2	48	48	34.7	205.92	1844	323.31		-6.37828	-5.98517	-0.393111		4.19913	4.09147	1.45926	+	+	+_+			31	39	39	41	38	42	1	1	1	8474200000		NaN	NaN	NaN	29.1331	28.8449	28.8932	28.5145	28.7344	28.4428		tr|A0A0D9QY09|A0A0D9QY09_CHLSB Uncharacterized protein OS=Chlorocebus sabaeus GN=PLXNB2 PE=4 SV=1;sp|O15031|PLXB2_HUMAN Plexin-B2 OS=Homo sapiens GN=PLXNB2 PE=1 SV=3
99	A0A0D9RU93;A0A087X1Z3;Q9UL46;H0YM70	PSME2	Proteasome activator complex subunit 2	14	14	67.6	29.043	253	323.31		-0.5161	0.0540752	-0.570175		1.29515	0.106028	1.67431						12	13	14	13	13	14	11	10	12	8429300000		27.985	28.5015	28.2778	28.9398	28.8135	28.5593	28.3547	28.2526	27.9949		tr|A0A0D9RU93|A0A0D9RU93_CHLSB Uncharacterized protein OS=Chlorocebus sabaeus GN=PSME2 PE=4 SV=1;tr|A0A087X1Z3|A0A087X1Z3_HUMAN Proteasome activator complex subunit 2 OS=Homo sapiens GN=PSME2 PE=1 SV=1;sp|Q9UL46|PSME2_HUMAN Proteasome activator complex sub
2542	A0A0D9RWA2;P09661;H0YKK0;H0YMA0	SNRPA1	U2 small nuclear ribonucleoprotein A	17	17	71	28.415	255	112.1		1.81796	1.42115	0.39681		1.77811	1.7379	0.60725	+					15	16	15	14	14	14	13	13	14	8324900000		29.842	30.1775	28.9656	27.3183	28.2893	27.9235	28.301	28.091	28.3295		tr|A0A0D9RWA2|A0A0D9RWA2_CHLSB Uncharacterized protein OS=Chlorocebus sabaeus GN=SNRPA1 PE=4 SV=1;sp|P09661|RU2A_HUMAN U2 small nuclear ribonucleoprotein A OS=Homo sapiens GN=SNRPA1 PE=1 SV=2;tr|H0YKK0|H0YKK0_HUMAN Small nuclear ribonucleoprotein polypept
2604	A0A0D9RX93;O94885	SASH1	SAM and SH3 domain-containing protein 1	37	37	36	132.49	1204	323.31		-5.80112	-5.91933	0.11821		3.28001	3.10087	0.094766	+	+	+_+			28	29	32	33	31	31	0	2	0	8316200000		23.7703	NaN	NaN	28.8621	28.1618	28.8339	29.1693	29.0684	27.9747		tr|A0A0D9RX93|A0A0D9RX93_CHLSB Uncharacterized protein OS=Chlorocebus sabaeus GN=SASH1 PE=4 SV=1;sp|O94885|SASH1_HUMAN SAM and SH3 domain-containing protein 1 OS=Homo sapiens GN=SASH1 PE=1 SV=3
3864	P21796;A0A0D9RMH0;C9JI87	VDAC1	Voltage-dependent anion-selective channel protein 1	17	17	60.1	30.772	283	250.68		-1.63513	-1.27636	-0.358773		2.67726	2.5234	0.7001	+					14	15	15	14	13	16	8	6	6	8235800000		26.9772	26.8774	27.3321	29.0579	28.5908	28.4432	28.2101	28.6229	28.1827		sp|P21796|VDAC1_HUMAN Voltage-dependent anion-selective channel protein 1 OS=Homo sapiens GN=VDAC1 PE=1 SV=2;tr|A0A0D9RMH0|A0A0D9RMH0_CHLSB Uncharacterized protein OS=Chlorocebus sabaeus GN=VDAC1 PE=4 SV=1;tr|C9JI87|C9JI87_HUMAN Voltage-dependent anion-sel
3050	A0A0D9S4U3	FASN	Uncharacterized protein	64	63	38	272.56	2510	323.31		1.12068	1.08171	0.0389697		1.1163	1.26121	0.0301612						40	35	35	30	29	45	52	33	42	8216100000		28.9908	29.431	30.0686	29.0786	28.0952	27.9546	28.3903	27.9894	28.8656		tr|A0A0D9S4U3|A0A0D9S4U3_CHLSB Uncharacterized protein OS=Chlorocebus sabaeus GN=FASN PE=4 SV=1
3128	A0A0D9S621;O43175;Q5SZU1	PHGDH	D-3-phosphoglycerate dehydrogenase	17	17	42.6	56.548	533	232.93		0.534422	0.358021	0.176401		1.48824	1.98227	0.52881						14	16	17	16	17	17	11	10	9	8197000000		28.6617	28.8141	28.9325	28.5549	28.0706	28.1796	28.4412	28.4351	28.458		tr|A0A0D9S621|A0A0D9S621_CHLSB D-3-phosphoglycerate dehydrogenase OS=Chlorocebus sabaeus GN=PHGDH PE=3 SV=1;sp|O43175|SERA_HUMAN D-3-phosphoglycerate dehydrogenase OS=Homo sapiens GN=PHGDH PE=1 SV=4;tr|Q5SZU1|Q5SZU1_HUMAN D-3-phosphoglycerate dehydrogenase
4074	Q15233;Q15233-2;A0A0D9RG28;H7C367;C9JYS8	NONO	Non-POU domain-containing octamer-binding protein	32	27	64.8	54.231	471	323.31		-1.3794	-4.5048	3.1254		2.90108	1.00999	0.678475	+	+	+_+			27	9	9	7	7	9	3	3	3	8167800000		22.394	22.4132	22.7634	23.8431	24.1349	23.7309	25.4648	24.4537	31.1665		sp|Q15233|NONO_HUMAN Non-POU domain-containing octamer-binding protein OS=Homo sapiens GN=NONO PE=1 SV=4;sp|Q15233-2|NONO_HUMAN Isoform 2 of Non-POU domain-containing octamer-binding protein OS=Homo sapiens GN=NONO;tr|A0A0D9RG28|A0A0D9RG28_CHLSB Uncharacte
3971	P60903;A0A0D9S5R0	S100A10	Protein S100-A10	7	7	53.6	11.203	97	45.291		0.109768	-0.0101013	0.119869		0.124114	0.0116298	0.128557						7	7	7	7	5	7	6	6	7	8134300000		28.8865	28.24	28.5797	28.6529	28.7876	27.9364	28.6709	28.901	28.1646		sp|P60903|S10AA_HUMAN Protein S100-A10 OS=Homo sapiens GN=S100A10 PE=1 SV=2;tr|A0A0D9S5R0|A0A0D9S5R0_CHLSB Uncharacterized protein OS=Chlorocebus sabaeus PE=3 SV=1
4321	Q9UGP8;A0A0D9RR21	SEC63	Translocation protein SEC63 homolog	24	24	38.7	87.996	760	223.29		-5.54719	-5.07804	-0.469156		3.99151	4.17269	0.978433	+	+	+_+			21	21	20	21	21	19	4	2	3	8084000000		23.4917	22.7978	23.7638	29.215	28.4898	28.9901	28.3066	28.4409	28.5399		sp|Q9UGP8|SEC63_HUMAN Translocation protein SEC63 homolog OS=Homo sapiens GN=SEC63 PE=1 SV=2;tr|A0A0D9RR21|A0A0D9RR21_CHLSB Uncharacterized protein OS=Chlorocebus sabaeus GN=SEC63 PE=4 SV=1
4220	Q92621	NUP205	Nuclear pore complex protein Nup205	62	21	36.8	227.92	2012	323.31		-6.36686	-6.28069	-0.0861613		5.94086	4.47144	0.099105	+	+	+_+			18	19	19	17	18	21	0	1	0	8070300000		NaN	NaN	NaN	28.4555	28.7601	28.76	28.8664	28.8679	27.9828		sp|Q92621|NU205_HUMAN Nuclear pore complex protein Nup205 OS=Homo sapiens GN=NUP205 PE=1 SV=3
344	A0A0D9QXA1;A0A0D9S9S1;O75947;A0A0D9S9S3;O75947-2	ATP5H	ATP synthase subunit d, mitochondrial	12	12	73.3	18.524	161	60.627		-0.988403	-0.870343	-0.11806		1.34622	1.35085	0.256108						10	11	10	9	10	9	5	6	5	8069500000		27.379	27.6676	28.3748	29.1316	28.7074	28.5476	28.6557	28.7848	28.5919		tr|A0A0D9QXA1|A0A0D9QXA1_CHLSB Uncharacterized protein OS=Chlorocebus sabaeus PE=4 SV=1;tr|A0A0D9S9S1|A0A0D9S9S1_CHLSB Uncharacterized protein OS=Chlorocebus sabaeus PE=4 SV=1;sp|O75947|ATP5H_HUMAN ATP synthase subunit d, mitochondrial OS=Homo sapiens GN=A
449	A0A0D9QYV7;Q9BSJ8;Q9BSJ8-2	ESYT1	Extended synaptotagmin-1	31	31	41.1	122.62	1104	213.58		-3.52101	-3.04612	-0.474894		2.82625	2.66854	1.33838	+	+	+_+			26	25	27	23	25	29	6	3	4	8049800000		24.8046	25.1227	26.217	29.0982	29.0076	28.6014	28.5079	28.4757	28.2989		tr|A0A0D9QYV7|A0A0D9QYV7_CHLSB Uncharacterized protein OS=Chlorocebus sabaeus GN=ESYT1 PE=4 SV=1;sp|Q9BSJ8|ESYT1_HUMAN Extended synaptotagmin-1 OS=Homo sapiens GN=ESYT1 PE=1 SV=1;sp|Q9BSJ8-2|ESYT1_HUMAN Isoform 2 of Extended synaptotagmin-1 OS=Homo sapiens
1839	A0A0D9RK15;Q8TCT9-5;Q8TCT9;Q8TCT9-2;Q8TCT9-4;A0A075B6F6	HM13	Minor histocompatibility antigen H13	8	8	23.4	41.431	376	313.85		-3.16938	-3.0967	-0.0726846		3.04421	3.40923	0.0633838	+	+	+_+			7	6	6	7	7	7	3	3	3	8014500000		25.1897	25.3487	25.7179	28.7971	29.0121	27.9552	28.8992	28.5568	28.0904		tr|A0A0D9RK15|A0A0D9RK15_CHLSB Uncharacterized protein OS=Chlorocebus sabaeus GN=HM13 PE=4 SV=1;sp|Q8TCT9-5|HM13_HUMAN Isoform 5 of Minor histocompatibility antigen H13 OS=Homo sapiens GN=HM13;sp|Q8TCT9|HM13_HUMAN Minor histocompatibility antigen H13 OS=Ho
1870	A0A0D9RKL1;Q9P035;H3BS72;H3BPZ1	HACD3	Very-long-chain (3R)-3-hydroxyacyl-CoA dehydratase 3	18	18	40.6	43.159	362	129.63		-5.82991	-5.70029	-0.129627		5.12564	3.97749	0.132343	+	+	+_+			14	15	14	13	11	13	1	0	1	8007900000		NaN	NaN	NaN	28.5813	28.9268	28.5409	29.0904	28.6434	27.9263		tr|A0A0D9RKL1|A0A0D9RKL1_CHLSB Very-long-chain (3R)-3-hydroxyacyl-CoA dehydratase OS=Chlorocebus sabaeus GN=HACD3 PE=3 SV=1;sp|Q9P035|HACD3_HUMAN Very-long-chain (3R)-3-hydroxyacyl-CoA dehydratase 3 OS=Homo sapiens GN=HACD3 PE=1 SV=2;tr|H3BS72|H3BS72_HUMAN
402	A0A0D9QY79;A0A0A0MSB8;Q9UPT5-5;Q9UPT5-6;Q9UPT5;Q9UPT5-2;Q9UPT5-1;B4DJ07;A0A0A0MRE1	EXOC7	Exocyst complex component 7	35	35	58.8	82.126	720	323.31		-5.10267	-4.86432	-0.238345		1.81195	1.72662	0.282591	+	+	+_+			28	31	33	32	31	30	2	1	1	7915200000		NaN	NaN	26.082	28.4107	28.61	29.079	28.5796	28.8696	27.9354		tr|A0A0D9QY79|A0A0D9QY79_CHLSB Uncharacterized protein OS=Chlorocebus sabaeus GN=EXOC7 PE=4 SV=1;tr|A0A0A0MSB8|A0A0A0MSB8_HUMAN Exocyst complex component 7 OS=Homo sapiens GN=EXOC7 PE=1 SV=1;sp|Q9UPT5-5|EXOC7_HUMAN Isoform 5 of Exocyst complex component 7
1515	A0A0D9RF27;Q16795	NDUFA9	NADH dehydrogenase [ubiquinone] 1 alpha subcomplex subunit 9, mitochondrial	15	15	46.7	42.624	377	59.442		-1.87438	-1.89761	0.0232347		2.47891	2.26143	0.0365311	+	+	+_+			14	13	15	13	13	15	5	6	6	7872700000		26.8251	27.0592	26.1072	28.369	28.6587	28.5869	28.6577	28.8443	28.1822		tr|A0A0D9RF27|A0A0D9RF27_CHLSB Uncharacterized protein OS=Chlorocebus sabaeus PE=4 SV=1;sp|Q16795|NDUA9_HUMAN NADH dehydrogenase [ubiquinone] 1 alpha subcomplex subunit 9, mitochondrial OS=Homo sapiens GN=NDUFA9 PE=1 SV=2
1548	A0A0D9RFM7;P15880;A0A0D9S9D4;H0YEN5;A0A0D9RII9;A0A0D9SE27;A0A0D9SAT6;I3L404;E9PMM9;E9PQD7;A0A0D9RFI2;A0A0D9SCA5;A0A0D9S9N5;E9PPT0;E9PM36;A0A0D9SBR4	RPS2	40S ribosomal protein S2	15	15	50.5	31.324	293	38.897		0.111467	-0.321416	0.432884		0.202014	0.326893	0.543511						11	12	9	11	10	10	8	11	11	7845200000		28.3294	28.5795	27.8757	28.2151	28.1908	28.0443	28.2394	28.2308	29.2787		tr|A0A0D9RFM7|A0A0D9RFM7_CHLSB Uncharacterized protein OS=Chlorocebus sabaeus GN=RPS2 PE=3 SV=1;sp|P15880|RS2_HUMAN 40S ribosomal protein S2 OS=Homo sapiens GN=RPS2 PE=1 SV=2;tr|A0A0D9S9D4|A0A0D9S9D4_CHLSB Uncharacterized protein OS=Chlorocebus sabaeus PE=
1899	A0A0D9RKW3;A0A0R4J2E8;A8MXP9;P43243;D6REM6;D6R991	MATR3	Matrin-3	37	37	48.5	94.65	847	323.31	188	-1.62569	-4.16893	2.54324		1.47714	0.810584	0.452334						37	8	4	7	8	6	0	1	1	7838200000		NaN	NaN	NaN	23.0397	24.0719	24.6885	23.8898	24.3228	31.2171		tr|A0A0D9RKW3|A0A0D9RKW3_CHLSB Uncharacterized protein OS=Chlorocebus sabaeus PE=4 SV=1;tr|A0A0R4J2E8|A0A0R4J2E8_HUMAN Matrin-3 OS=Homo sapiens GN=MATR3 PE=1 SV=1;tr|A8MXP9|A8MXP9_HUMAN Matrin-3 OS=Homo sapiens GN=MATR3 PE=1 SV=1;sp|P43243|MATR3_HUMAN Matr
143	I3L0X9;I3L3T0;P57737-3;A0A0D9RAA0;A0A0A6YYL4;Q9Y3D7;I3L1U7	PAM16;CORO7-PAM16	Coronin;Mitochondrial import inner membrane translocase subunit TIM16	7	7	55.5	15.131	137	191.61		-5.40606	-4.82445	-0.581614		1.80672	1.64002	0.616225	+	+	+_+			5	7	7	7	7	7	3	2	3	7803300000		NaN	NaN	25.9781	28.2435	29.0661	29.1493	28.3236	28.7272	27.6633		tr|I3L0X9|I3L0X9_HUMAN Mitochondrial import inner membrane translocase subunit TIM16 OS=Homo sapiens GN=PAM16 PE=4 SV=1;tr|I3L3T0|I3L3T0_HUMAN HCG15164, isoform CRA_b OS=Homo sapiens GN=PAM16 PE=4 SV=1;sp|P57737-3|CORO7_HUMAN Isoform 3 of Coronin-7 OS=Homo
2655	A0A0D9RY48;Q9Y4W6	AFG3L2	AFG3-like protein 2	32	31	47.6	78.58	708	131.42		-3.47314	-2.36632	-1.10682		2.28023	4.31231	0.825339	+	+	+_+			13	25	24	24	28	23	3	3	3	7797400000		25.1957	25.5838	25.4129	28.0066	28.5356	30.0696	27.7591	27.8685	27.6638		tr|A0A0D9RY48|A0A0D9RY48_CHLSB Uncharacterized protein OS=Chlorocebus sabaeus GN=AFG3L2 PE=3 SV=1;sp|Q9Y4W6|AFG32_HUMAN AFG3-like protein 2 OS=Homo sapiens GN=AFG3L2 PE=1 SV=2
2337	A0A0D9RSV8;Q13724;Q13724-2;C9J8D4	MOGS	Mannosyl-oligosaccharide glucosidase	30	30	52.3	92.036	837	271.98		-3.8159	-3.50085	-0.315049		2.72952	2.43455	0.253979	+	+	+_+			24	22	25	21	18	26	2	2	3	7722900000		25.2314	23.9763	25.2677	28.3784	29.2471	28.2976	28.7661	28.6586	27.5533		tr|A0A0D9RSV8|A0A0D9RSV8_CHLSB Uncharacterized protein OS=Chlorocebus sabaeus GN=MOGS PE=4 SV=1;sp|Q13724|MOGS_HUMAN Mannosyl-oligosaccharide glucosidase OS=Homo sapiens GN=MOGS PE=1 SV=5;sp|Q13724-2|MOGS_HUMAN Isoform 2 of Mannosyl-oligosaccharide glucosi
1318	A0A0D9RBU9;O43813;E9PHS0	LANCL1	LanC-like protein 1	16	16	45.6	45.253	399	124.77		2.34822	2.57639	-0.228172		2.50167	1.80038	0.138455	+	+	+_+			5	10	10	9	8	8	15	14	15	7699200000		30.1399	30.865	29.8722	27.5379	28.2975	27.9971	28.2828	28.2847	26.5805		tr|A0A0D9RBU9|A0A0D9RBU9_CHLSB Uncharacterized protein OS=Chlorocebus sabaeus GN=LANCL1 PE=4 SV=1;sp|O43813|LANC1_HUMAN LanC-like protein 1 OS=Homo sapiens GN=LANCL1 PE=1 SV=1;tr|E9PHS0|E9PHS0_HUMAN LanC-like protein 1 (Fragment) OS=Homo sapiens GN=LANCL1
2824	A0A0D9S0X3;P42167;G5E972;H0YJH7	TMPO	Lamina-associated polypeptide 2, isoforms beta/gamma;Thymopoietin;Thymopentin	18	6	49.3	50.656	454	232.66		-2.82612	-3.08897	0.262846		3.2014	3.6112	0.778855	+	+	+_+			5	5	5	5	5	6	2	2	3	7633600000		25.793	25.8629	25.0873	28.1733	28.3543	28.694	28.6899	28.6108	28.7095		tr|A0A0D9S0X3|A0A0D9S0X3_CHLSB Uncharacterized protein OS=Chlorocebus sabaeus PE=4 SV=1;sp|P42167|LAP2B_HUMAN Lamina-associated polypeptide 2, isoforms beta/gamma OS=Homo sapiens GN=TMPO PE=1 SV=2;tr|G5E972|G5E972_HUMAN Lamina-associated polypeptide 2, iso
1463	A0A0D9RE54;E9PJH7;Q9H936;A0A0D9SFE1	SLC25A22	Mitochondrial glutamate carrier 1	14	14	47.1	34.55	323	134.33		-2.62881	-2.39098	-0.237832		1.96471	1.57545	0.193898	+	+	+_+			12	13	13	14	14	14	3	5	6	7530000000		26.4377	26.4987	24.8168	28.1745	28.8389	28.6263	28.7007	28.7716	27.4539		tr|A0A0D9RE54|A0A0D9RE54_CHLSB Uncharacterized protein OS=Chlorocebus sabaeus GN=SLC25A22 PE=3 SV=1;tr|E9PJH7|E9PJH7_HUMAN Mitochondrial glutamate carrier 1 (Fragment) OS=Homo sapiens GN=SLC25A22 PE=1 SV=5;sp|Q9H936|GHC1_HUMAN Mitochondrial glutamate carri
4251	Q99615;Q99615-2;K7EIH8;K7EPP7;K7ESP1	DNAJC7	DnaJ homolog subfamily C member 7	25	25	50	56.44	494	172.1		-0.753862	-0.561506	-0.192355		1.9545	1.01195	0.39548						15	23	22	20	20	20	6	7	7	7446800000		27.3803	27.6746	27.9497	28.4947	28.4062	28.3654	28.3899	28.4707	27.8286		sp|Q99615|DNJC7_HUMAN DnaJ homolog subfamily C member 7 OS=Homo sapiens GN=DNAJC7 PE=1 SV=2;sp|Q99615-2|DNJC7_HUMAN Isoform 2 of DnaJ homolog subfamily C member 7 OS=Homo sapiens GN=DNAJC7;tr|K7EIH8|K7EIH8_HUMAN DnaJ homolog subfamily C member 7 (Fragment)
1720	A0A0D9RIA0;J3KN16	KIAA0368	Uncharacterized protein	93	13	63.8	203.88	1840	323.31		-4.46023	-4.03802	-0.422206		4.61679	3.66682	0.613561	+	+	+_+			10	12	12	10	11	10	2	2	3	7396100000		23.8497	24.2224	24.3456	28.3473	28.6468	28.8043	28.3182	28.5731	27.6405		tr|A0A0D9RIA0|A0A0D9RIA0_CHLSB Uncharacterized protein OS=Chlorocebus sabaeus GN=KIAA0368 PE=4 SV=1;tr|J3KN16|J3KN16_HUMAN Proteasome-associated protein ECM29 homolog OS=Homo sapiens GN=KIAA0368 PE=1 SV=1
3175	A0A0D9S6Y9;Q5T4U5;P11310;P11310-2;B7Z9I1	ACADM	Medium-chain specific acyl-CoA dehydrogenase, mitochondrial	18	18	37.5	46.624	421	178.41		0.188814	0.478699	-0.289885		0.344172	0.667231	0.401682						11	13	9	15	15	15	9	10	10	7394500000		28.3932	28.7541	28.137	28.3954	27.96	28.3625	27.9949	28.3956	27.4578		tr|A0A0D9S6Y9|A0A0D9S6Y9_CHLSB Uncharacterized protein OS=Chlorocebus sabaeus GN=ACADM PE=3 SV=1;tr|Q5T4U5|Q5T4U5_HUMAN Acyl-Coenzyme A dehydrogenase, C-4 to C-12 straight chain, isoform CRA_a OS=Homo sapiens GN=ACADM PE=1 SV=1;sp|P11310|ACADM_HUMAN Medium
3954	P53396-2;P53396;P53396-3;A0A0D9S2A5	ACLY	ATP-citrate synthase	37	37	37.7	119.77	1091	120.56		1.52594	1.55596	-0.0300229		2.20502	2.21098	0.0532978	+	+	+_+			25	25	28	25	25	30	26	24	24	7340200000		28.9382	29.2578	29.8207	28.0737	27.6445	27.7206	27.7535	27.5531	28.0422		sp|P53396-2|ACLY_HUMAN Isoform 2 of ATP-citrate synthase OS=Homo sapiens GN=ACLY;sp|P53396|ACLY_HUMAN ATP-citrate synthase OS=Homo sapiens GN=ACLY PE=1 SV=3;sp|P53396-3|ACLY_HUMAN Isoform 3 of ATP-citrate synthase OS=Homo sapiens GN=ACLY;tr|A0A0D9S2A5|A0A0
2233	A0A0D9RR53;Q06210-2;Q06210	GFPT1	Glutamine--fructose-6-phosphate aminotransferase [isomerizing] 1	37	29	63	76.778	681	323.31	243	-0.36014	-0.817817	0.457677		0.539604	2.02391	0.876969						23	25	24	22	20	25	12	14	15	7339100000		27.8798	27.9021	27.379	28.5359	27.9844	27.721	28.5574	28.4657	28.5912		tr|A0A0D9RR53|A0A0D9RR53_CHLSB Uncharacterized protein OS=Chlorocebus sabaeus GN=GFPT1 PE=4 SV=1;sp|Q06210-2|GFPT1_HUMAN Isoform 2 of Glutamine--fructose-6-phosphate aminotransferase [isomerizing] 1 OS=Homo sapiens GN=GFPT1;sp|Q06210|GFPT1_HUMAN Glutamine-
3906	P35606-2;P35606;A0A0D9RFH5	COPB2	Coatomer subunit beta	32	32	49.7	99.045	877	323.31		-3.8806	-3.92902	0.0484111		1.99275	2.09084	0.0573822	+	+	+_+			23	28	28	22	24	30	4	3	2	7205800000		25.839	24.8397	23.1025	28.891	28.5888	27.9431	28.6876	28.4599	28.4207		sp|P35606-2|COPB2_HUMAN Isoform 2 of Coatomer subunit beta OS=Homo sapiens GN=COPB2;sp|P35606|COPB2_HUMAN Coatomer subunit beta OS=Homo sapiens GN=COPB2 PE=1 SV=2;tr|A0A0D9RFH5|A0A0D9RFH5_CHLSB Uncharacterized protein OS=Chlorocebus sabaeus PE=4 SV=1
3988	P62753;A0A0D9RAL5;A2A3R5;A2A3R7	RPS6	40S ribosomal protein S6	10	10	35.7	28.68	249	43.462		-0.0908	-0.667978	0.577178		0.233407	0.484755	0.41263						9	8	8	8	8	8	6	7	7	7164600000		28.1596	27.9289	27.7434	27.8615	28.1848	28.058	28.0636	27.9867	29.7854		sp|P62753|RS6_HUMAN 40S ribosomal protein S6 OS=Homo sapiens GN=RPS6 PE=1 SV=1;tr|A0A0D9RAL5|A0A0D9RAL5_CHLSB 40S ribosomal protein S6 OS=Chlorocebus sabaeus PE=3 SV=1;tr|A2A3R5|A2A3R5_HUMAN 40S ribosomal protein S6 OS=Homo sapiens GN=RPS6 PE=1 SV=1;tr|A2A
3067	A0A0D9S509	TBCD	Uncharacterized protein	34	34	38.7	132.92	1192	323.31		-4.88744	-4.38749	-0.499956		3.70124	2.97594	0.458761	+	+	+_+			23	29	31	28	28	27	3	1	3	7121600000		23.4142	23.5845	24.403	28.2587	28.8473	28.958	28.5368	28.6703	27.357		tr|A0A0D9S509|A0A0D9S509_CHLSB Uncharacterized protein OS=Chlorocebus sabaeus GN=TBCD PE=4 SV=1
1195	A0A0D9R9U2	LTN1	Uncharacterized protein	93	23	60.4	200.52	1766	323.31		-6.06826	-5.81745	-0.250816		4.61536	4.05896	0.37979	+	+	+_+			19	21	21	19	20	19	0	1	0	7060400000		NaN	NaN	NaN	28.6102	28.3703	28.7141	28.4875	28.6484	27.8064		tr|A0A0D9R9U2|A0A0D9R9U2_CHLSB Uncharacterized protein OS=Chlorocebus sabaeus GN=LTN1 PE=4 SV=1
883	A0A0D9R4X9;Q2TAZ0;Q2TAZ0-3;H7C3T2	ATG2A	Autophagy-related protein 2 homolog A	43	42	33.4	212.44	1932	201.5		-5.88983	-5.9153	0.0254726		3.55546	3.50697	0.0646619	+	+	+_+			29	31	32	32	30	33	0	0	0	7056600000		NaN	NaN	NaN	28.5534	28.4445	28.4573	28.7594	28.4663	28.306		tr|A0A0D9R4X9|A0A0D9R4X9_CHLSB Uncharacterized protein OS=Chlorocebus sabaeus GN=ATG2A PE=4 SV=1;sp|Q2TAZ0|ATG2A_HUMAN Autophagy-related protein 2 homolog A OS=Homo sapiens GN=ATG2A PE=1 SV=3;sp|Q2TAZ0-3|ATG2A_HUMAN Isoform 2 of Autophagy-related protein 2
824	A0A0D9R493;P22695	UQCRC2	Cytochrome b-c1 complex subunit 2, mitochondrial	20	20	62	48.523	453	214.26		-2.44245	-1.73127	-0.711183		2.1914	1.97009	1.23125	+	+	+_+			17	16	16	16	15	18	5	5	5	7030500000		26.6413	25.4951	26.644	29.0857	28.8401	28.182	28.019	27.9339	28.0213		tr|A0A0D9R493|A0A0D9R493_CHLSB Uncharacterized protein OS=Chlorocebus sabaeus GN=UQCRC2 PE=3 SV=1;sp|P22695|QCR2_HUMAN Cytochrome b-c1 complex subunit 2, mitochondrial OS=Homo sapiens GN=UQCRC2 PE=1 SV=3
2349	A0A0D9RSZ9	LETM1	Uncharacterized protein	34	10	50.9	83.092	739	323.31		-2.6874	-2.3439	-0.343502		2.10588	2.01043	0.36537	+	+	+_+			10	8	9	9	9	8	3	2	3	6975200000		24.8763	25.9582	26.3722	27.7998	28.7705	28.6986	28.2492	28.3801	27.6091		tr|A0A0D9RSZ9|A0A0D9RSZ9_CHLSB Uncharacterized protein OS=Chlorocebus sabaeus GN=LETM1 PE=4 SV=1
3935	P48047;A0A0D9SDT2;H7C0C1	ATP5O	ATP synthase subunit O, mitochondrial	7	7	38	23.277	213	52		-1.45639	-1.30387	-0.152523		2.32867	2.1466	0.338013	+					7	6	7	7	7	7	7	4	6	6959100000		26.7385	26.8368	27.4421	28.6201	28.2037	28.5627	28.058	28.5119	28.3591		sp|P48047|ATPO_HUMAN ATP synthase subunit O, mitochondrial OS=Homo sapiens GN=ATP5O PE=1 SV=1;tr|A0A0D9SDT2|A0A0D9SDT2_CHLSB Uncharacterized protein OS=Chlorocebus sabaeus PE=3 SV=1;tr|H7C0C1|H7C0C1_HUMAN Uncharacterized protein (Fragment) OS=Homo sapiens
2902	A0A0D9S2A3;H0Y7A7;P62158;E7ETZ0;E7EMB3;G3V361;Q96HY3	CALM2;CALM1	Calmodulin	11	9	70.5	16.837	149	163.19		-0.673836	-0.723795	0.0499592		1.37283	1.8497	0.101233						7	6	8	7	8	9	4	7	6	6939200000		27.5169	27.3089	27.8586	28.5556	28.1352	28.0152	28.2481	28.4166	28.1911		tr|A0A0D9S2A3|A0A0D9S2A3_CHLSB Uncharacterized protein OS=Chlorocebus sabaeus GN=CALM1 PE=4 SV=1;tr|H0Y7A7|H0Y7A7_HUMAN Calmodulin (Fragment) OS=Homo sapiens GN=CALM2 PE=1 SV=1;sp|P62158|CALM_HUMAN Calmodulin OS=Homo sapiens GN=CALM1 PE=1 SV=2;tr|E7ETZ0|E7
4093	Q3ZCM7;A0A0D9RX11;A0A075B736;Q5SQY0	TUBB8	Tubulin beta-8 chain	12	1	25	49.775	444	71.05		0.565182	1.29276	-0.727573		0.421416	1.14466	0.911946						1	1	1	1	1	1	1	1	1	6820500000		29.2415	29.3583	27.8485	28.0294	27.8731	28.8503	27.8731	27.5696	27.1273		sp|Q3ZCM7|TBB8_HUMAN Tubulin beta-8 chain OS=Homo sapiens GN=TUBB8 PE=1 SV=2;tr|A0A0D9RX11|A0A0D9RX11_CHLSB Tubulin beta chain OS=Chlorocebus sabaeus PE=3 SV=1;tr|A0A075B736|A0A075B736_HUMAN Tubulin beta chain OS=Homo sapiens GN=TUBB8 PE=1 SV=1;tr|Q5SQY0|Q
444	A0A0D9QYU5;P14649;F8W1I5	MYL6B	Myosin light chain 6B	15	13	65.1	22.89	209	133.4		-6.04421	-5.80135	-0.242867		3.66383	3.63183	0.417076	+	+	+_+			9	10	12	13	13	13	0	0	0	6816800000		NaN	NaN	NaN	28.5063	28.9364	28.295	28.6165	28.3333	28.0594		tr|A0A0D9QYU5|A0A0D9QYU5_CHLSB Uncharacterized protein OS=Chlorocebus sabaeus GN=MYL6B PE=4 SV=1;sp|P14649|MYL6B_HUMAN Myosin light chain 6B OS=Homo sapiens GN=MYL6B PE=1 SV=1;tr|F8W1I5|F8W1I5_HUMAN Myosin light chain 6B OS=Homo sapiens GN=MYL6B PE=1 SV=1
2248	A0A0D9RRG7;P18031;B4DSN5	PTPN1	Tyrosine-protein phosphatase non-receptor type 1;Tyrosine-protein phosphatase non-receptor type	21	21	49.9	49.978	435	76.732		-2.58714	-2.16631	-0.420825		3.33462	2.83651	0.524073	+	+	+_+			14	19	15	15	17	19	6	6	6	6801600000		26.1756	26.0499	25.8966	28.1819	28.9648	28.7367	28.2062	28.6677	27.7471		tr|A0A0D9RRG7|A0A0D9RRG7_CHLSB Tyrosine-protein phosphatase non-receptor type OS=Chlorocebus sabaeus GN=PTPN1 PE=3 SV=1;sp|P18031|PTN1_HUMAN Tyrosine-protein phosphatase non-receptor type 1 OS=Homo sapiens GN=PTPN1 PE=1 SV=1;tr|B4DSN5|B4DSN5_HUMAN Tyrosine
1383	A0A0D9RD03;P55072	VCP	Transitional endoplasmic reticulum ATPase	39	39	59.9	89.321	806	199.18		-0.142355	-0.349911	0.207556		0.0800595	0.213823	0.626298						28	29	28	28	25	29	17	19	9	6785700000		28.723	26.627	28.1156	27.8548	27.9228	28.1151	28.0897	28.0044	28.4213		tr|A0A0D9RD03|A0A0D9RD03_CHLSB Uncharacterized protein OS=Chlorocebus sabaeus GN=VCP PE=3 SV=1;sp|P55072|TERA_HUMAN Transitional endoplasmic reticulum ATPase OS=Homo sapiens GN=VCP PE=1 SV=4
3248	A0A0D9SDU9;A0A0D9S814;Q9UII2	ATPIF1	ATPase inhibitor, mitochondrial	5	5	21.7	12.296	106	30.205		-0.463091	-0.546097	0.0830059		1.22095	0.795093	0.0924683						5	5	5	5	4	5	2	2	2	6781400000		27.4913	27.7225	27.9142	28.1681	27.9501	28.3991	27.742	28.7558	28.2684		tr|A0A0D9SDU9|A0A0D9SDU9_CHLSB Uncharacterized protein OS=Chlorocebus sabaeus PE=4 SV=1;tr|A0A0D9S814|A0A0D9S814_CHLSB Uncharacterized protein OS=Chlorocebus sabaeus PE=4 SV=1;sp|Q9UII2|ATIF1_HUMAN ATPase inhibitor, mitochondrial OS=Homo sapiens GN=ATPIF1
872	A0A0D9R4U4;Q00587-2;Q00587	CDC42EP1	Cdc42 effector protein 1	21	20	64.5	39.016	377	143.92	192	-5.31357	-5.49369	0.180117		5.85079	4.49648	0.301065	+	+	+_+			18	16	18	18	15	15	0	0	0	6712900000		NaN	NaN	NaN	28.2683	28.2387	28.1458	28.7244	28.5398	27.929		tr|A0A0D9R4U4|A0A0D9R4U4_CHLSB Uncharacterized protein OS=Chlorocebus sabaeus GN=CDC42EP1 PE=4 SV=1;sp|Q00587-2|BORG5_HUMAN Isoform 2 of Cdc42 effector protein 1 OS=Homo sapiens GN=CDC42EP1;sp|Q00587|BORG5_HUMAN Cdc42 effector protein 1 OS=Homo sapiens GN=
24	A0A087WTP3;A0A0D9RB84;Q92945;M0R0I5	KHSRP	Far upstream element-binding protein 2	26	23	43.2	73.027	711	116.31		0.967738	0.883223	0.0845153		2.29343	2.62276	0.28354						17	18	17	16	17	20	18	20	20	6701900000		29.0626	29.2491	28.8099	28.2549	28.1123	27.8511	28.1965	28.1236	28.1518		tr|A0A087WTP3|A0A087WTP3_HUMAN Far upstream element-binding protein 2 OS=Homo sapiens GN=KHSRP PE=1 SV=1;tr|A0A0D9RB84|A0A0D9RB84_CHLSB Uncharacterized protein OS=Chlorocebus sabaeus GN=KHSRP PE=4 SV=1;sp|Q92945|FUBP2_HUMAN Far upstream element-binding pro
349	A0A0D9QXD1;Q8WVX9;E9PNW8	FAR1	Fatty acyl-CoA reductase 1	20	20	41.4	59.328	515	131.28		-4.85064	-4.81555	-0.0350889		3.01446	3.10656	0.0589998	+	+	+_+			18	19	18	16	16	20	3	1	1	6668600000		NaN	NaN	24.3435	28.8274	28.3138	28.1733	28.3804	28.3236	28.5054		tr|A0A0D9QXD1|A0A0D9QXD1_CHLSB Fatty acyl-CoA reductase OS=Chlorocebus sabaeus GN=FAR1 PE=3 SV=1;sp|Q8WVX9|FACR1_HUMAN Fatty acyl-CoA reductase 1 OS=Homo sapiens GN=FAR1 PE=1 SV=1;tr|E9PNW8|E9PNW8_HUMAN Fatty acyl-CoA reductase 1 (Fragment) OS=Homo sapiens
2783	A0A0D9S001;E9PF19;Q96E41;Q9Y4P3	TBL2	Transducin beta-like protein 2	18	18	45.3	49.733	446	132.63		-4.6861	-4.76918	0.0830803		1.89587	1.90139	0.0982126	+	+	+_+			14	17	17	14	16	16	0	1	2	6597800000		NaN	25.6952	NaN	28.5199	28.3954	27.9562	28.016	28.8559	28.2489		tr|A0A0D9S001|A0A0D9S001_CHLSB Uncharacterized protein OS=Chlorocebus sabaeus GN=TBL2 PE=4 SV=1;tr|E9PF19|E9PF19_HUMAN Transducin beta-like protein 2 OS=Homo sapiens GN=TBL2 PE=1 SV=1;tr|Q96E41|Q96E41_HUMAN TBL2 protein OS=Homo sapiens GN=TBL2 PE=1 SV=1;sp
3996	P63218	GNG5	Guanine nucleotide-binding protein G(I)/G(S)/G(O) subunit gamma-5	6	6	88.2	7.3184	68	52.091		-2.57117	-2.17845	-0.392717		0.930923	0.777093	1.06745						5	6	5	5	5	4	3	3	1	6588300000		27.0124	NaN	27.2807	28.2012	28.5566	28.5451	28.078	28.2423	27.8045		sp|P63218|GBG5_HUMAN Guanine nucleotide-binding protein G(I)/G(S)/G(O) subunit gamma-5 OS=Homo sapiens GN=GNG5 PE=1 SV=3
1343	A0A0D9RC78;P62906	RPL10A	60S ribosomal protein L10a	11	11	43.8	24.831	217	85.174		0.93375	-0.0154584	0.949208		2.20692	0.00581356	0.477259						11	11	10	9	10	10	6	6	6	6550100000		28.6883	28.4199	28.1607	27.4568	27.6596	27.3511	27.4042	27.7686	30.1424		tr|A0A0D9RC78|A0A0D9RC78_CHLSB Ribosomal protein OS=Chlorocebus sabaeus GN=RPL10A PE=3 SV=1;sp|P62906|RL10A_HUMAN 60S ribosomal protein L10a OS=Homo sapiens GN=RPL10A PE=1 SV=2
2979	E9PN17;A0A0D9SCT7;A0A0D9SB63;A0A0D9S3L6;O75964	ATP5L	ATP synthase subunit g, mitochondrial	5	5	52.6	8.4518	76	48.365		-0.811279	-0.462957	-0.348322		1.17842	0.668203	0.558845						5	4	5	5	5	5	2	3	3	6544000000		27.5431	26.7354	27.4269	28.4474	27.9014	27.7905	27.357	27.7332	28.004		tr|E9PN17|E9PN17_HUMAN ATP synthase subunit g, mitochondrial OS=Homo sapiens GN=ATP5L PE=1 SV=1;tr|A0A0D9SCT7|A0A0D9SCT7_CHLSB Uncharacterized protein OS=Chlorocebus sabaeus PE=4 SV=1;tr|A0A0D9SB63|A0A0D9SB63_CHLSB Uncharacterized protein OS=Chlorocebus sa
3397	A0A0D9SBL4;P46783;F6U211;S4R435;A0A0D9SC16;A0A0D9SAT0	RPS10;RPS10-NUDT3	40S ribosomal protein S10	7	7	40	18.898	165	146.09		0.0782019	0.0075531	0.0706488		0.0794624	0.0147662	0.0641209						7	5	7	4	6	6	4	5	5	6529200000		28.2851	28.2602	28.1744	27.495	28.6524	28.3377	27.9407	28.5157	28.2407		tr|A0A0D9SBL4|A0A0D9SBL4_CHLSB Uncharacterized protein OS=Chlorocebus sabaeus GN=RPS10 PE=4 SV=1;sp|P46783|RS10_HUMAN 40S ribosomal protein S10 OS=Homo sapiens GN=RPS10 PE=1 SV=1;tr|F6U211|F6U211_HUMAN 40S ribosomal protein S10 OS=Homo sapiens GN=RPS10 PE=
3341	A0A0D9SAT8;A0A0D9S9W1		Uncharacterized protein	5	5	47.2	11.731	106	9.1187		-4.1364	-3.83082	-0.305575		1.67168	1.58835	0.366996	+	+	+_+			5	5	5	4	4	5	1	2	1	6509600000		26.4361	NaN	NaN	27.8503	28.5855	28.7894	28.2641	28.3383	27.706		tr|A0A0D9SAT8|A0A0D9SAT8_CHLSB Uncharacterized protein OS=Chlorocebus sabaeus PE=4 SV=1;tr|A0A0D9S9W1|A0A0D9S9W1_CHLSB Uncharacterized protein OS=Chlorocebus sabaeus PE=4 SV=1
2007	A0A0D9RMI9;P28482;ANL002;P28482-2	MAPK1	Mitogen-activated protein kinase 1	24	18	85.6	41.389	360	276.93		1.17206	0.822463	0.349597		1.32314	1.86918	0.393772						15	17	18	17	15	16	16	13	16	6465200000		28.9123	28.5607	29.2054	28.4203	27.5823	27.1596	27.9585	28.1026	28.15		tr|A0A0D9RMI9|A0A0D9RMI9_CHLSB Mitogen-activated protein kinase OS=Chlorocebus sabaeus GN=MAPK1 PE=3 SV=1;in|P28482|Recombinant MK01_HUMAN Mitogen-activated protein kinase 1 project ANL_R07_030408 - Homo sapiens (Human).;in|ANL002|FLAG-TAGGED ERK2 related
3837	P10809	HSPD1	60 kDa heat shock protein, mitochondrial	43	1	66	61.054	573	159.91		1.17014	1.37547	-0.205337		2.38513	1.46614	0.173319						1	1	1	1	1	1	1	1	1	6460800000		29.323	29.1429	28.9178	27.7587	28.2739	27.8407	28.2351	28.1048	26.9174		sp|P10809|CH60_HUMAN 60 kDa heat shock protein, mitochondrial OS=Homo sapiens GN=HSPD1 PE=1 SV=2
2458	A0A0D9RUJ6;P17302	GJA1	Gap junction alpha-1 protein	12	12	38.7	43.082	382	172.15	364	-5.94066	-5.83855	-0.102114		3.98178	3.43358	0.0930466	+	+	+_+			11	11	11	10	11	11	0	0	0	6450000000		NaN	NaN	NaN	28.1098	28.4666	28.4661	28.5522	28.6811	27.5029		tr|A0A0D9RUJ6|A0A0D9RUJ6_CHLSB Gap junction protein OS=Chlorocebus sabaeus GN=GJA1 PE=3 SV=1;sp|P17302|CXA1_HUMAN Gap junction alpha-1 protein OS=Homo sapiens GN=GJA1 PE=1 SV=2
3331	A0A0D9S9I8;P26373;P26373-2;J3QSB4	RPL13	60S ribosomal protein L13	13	13	46.9	24.291	211	30.748		0.909143	0.646763	0.262379		1.35015	0.740297	0.287326						12	11	9	8	7	9	10	10	9	6431400000		29.0896	28.6696	28.2281	27.3688	27.9168	27.9742	28.0633	27.4492	28.5345		tr|A0A0D9S9I8|A0A0D9S9I8_CHLSB 60S ribosomal protein L13 OS=Chlorocebus sabaeus GN=RPL13 PE=3 SV=1;sp|P26373|RL13_HUMAN 60S ribosomal protein L13 OS=Homo sapiens GN=RPL13 PE=1 SV=4;sp|P26373-2|RL13_HUMAN Isoform 2 of 60S ribosomal protein L13 OS=Homo sapie
2428	A0A0D9RU51;Q9NS86	LANCL2	LanC-like protein 2	20	20	49.8	50.794	450	123.53		2.05931	1.84222	0.21709		5.42863	2.79087	0.38284	+	+	+_+			15	16	13	14	13	13	14	13	15	6385100000		29.4921	29.6449	29.4851	27.4715	27.4436	27.5291	28.1508	27.5958	27.3488		tr|A0A0D9RU51|A0A0D9RU51_CHLSB Uncharacterized protein OS=Chlorocebus sabaeus GN=LANCL2 PE=4 SV=1;sp|Q9NS86|LANC2_HUMAN LanC-like protein 2 OS=Homo sapiens GN=LANCL2 PE=1 SV=1
471	A0A0D9QZ74;Q96IX5	USMG5	Up-regulated during skeletal muscle growth protein 5	5	5	46.6	6.4825	58	149.66		-2.45489	-2.26205	-0.192844		3.39231	3.0388	0.36963	+	+	+_+			4	5	4	5	5	5	2	2	2	6310300000		26.1643	25.9634	25.5339	28.2294	28.5973	28.1996	28.1868	28.4352	27.8257		tr|A0A0D9QZ74|A0A0D9QZ74_CHLSB Uncharacterized protein OS=Chlorocebus sabaeus GN=USMG5 PE=4 SV=1;sp|Q96IX5|USMG5_HUMAN Up-regulated during skeletal muscle growth protein 5 OS=Homo sapiens GN=USMG5 PE=1 SV=1
1307	A0A0D9RBM0;P61313;E7EQV9;E7ENU7	RPL15	60S ribosomal protein L15;Ribosomal protein L15	10	10	40.2	24.146	204	26.324		0.31824	-0.907547	1.22579		0.226777	0.477774	0.554746						9	5	4	4	5	4	4	4	4	6296300000		27.4813	27.1271	27.3961	25.9398	27.5325	27.5774	27.4627	27.3874	29.877		tr|A0A0D9RBM0|A0A0D9RBM0_CHLSB Ribosomal protein L15 OS=Chlorocebus sabaeus GN=RPL15 PE=3 SV=1;sp|P61313|RL15_HUMAN 60S ribosomal protein L15 OS=Homo sapiens GN=RPL15 PE=1 SV=2;tr|E7EQV9|E7EQV9_HUMAN Ribosomal protein L15 (Fragment) OS=Homo sapiens GN=RPL1
2647	A0A0D9RXY2;Q13619;A0A0A0MR50;Q13619-2	CUL4A	Cullin-4A	38	28	54.3	87.635	759	270.31		-5.23754	-5.69181	0.454267		6.59073	5.58886	1.6502	+	+	+_+			20	25	26	23	22	25	0	0	0	6284300000		NaN	NaN	NaN	28.0689	28.0394	28.0476	28.7431	28.4583	28.3173		tr|A0A0D9RXY2|A0A0D9RXY2_CHLSB Uncharacterized protein OS=Chlorocebus sabaeus GN=CUL4A PE=3 SV=1;sp|Q13619|CUL4A_HUMAN Cullin-4A OS=Homo sapiens GN=CUL4A PE=1 SV=3;tr|A0A0A0MR50|A0A0A0MR50_HUMAN Cullin-4A OS=Homo sapiens GN=CUL4A PE=1 SV=1;sp|Q13619-2|CUL4
2882	A0A0D9S1Z5;P62316;P62316-2;K7EJB5	SNRPD2	Small nuclear ribonucleoprotein Sm D2	12	12	79.7	13.527	118	79.88		-1.57938	-1.90788	0.328503		2.07057	1.7638	0.339553	+	+	+_+			12	10	10	10	11	10	7	3	4	6265000000		26.8736	26.3023	25.8244	27.697	27.917	28.1244	27.718	28.0246	28.9813		tr|A0A0D9S1Z5|A0A0D9S1Z5_CHLSB Uncharacterized protein OS=Chlorocebus sabaeus GN=SNRPD2 PE=4 SV=1;sp|P62316|SMD2_HUMAN Small nuclear ribonucleoprotein Sm D2 OS=Homo sapiens GN=SNRPD2 PE=1 SV=1;sp|P62316-2|SMD2_HUMAN Isoform 2 of Small nuclear ribonucleopro
3278	A0A0D9S8D8;P47756-2;B1AK87;B1AK88;P47756;B1AK85	CAPZB	F-actin-capping protein subunit beta	18	18	67.3	30.598	272	194.72		1.83736	1.59711	0.240255		4.7877	3.1535	0.648065	+	+	+_+			13	14	15	13	12	11	14	13	15	6230800000		29.2111	29.3461	29.1602	27.5021	27.3484	27.3548	27.5906	27.3945	27.941		tr|A0A0D9S8D8|A0A0D9S8D8_CHLSB Uncharacterized protein OS=Chlorocebus sabaeus GN=CAPZB PE=4 SV=1;sp|P47756-2|CAPZB_HUMAN Isoform 2 of F-actin-capping protein subunit beta OS=Homo sapiens GN=CAPZB;tr|B1AK87|B1AK87_HUMAN Capping protein (Actin filament) musc
299	A0A0D9QWF5;Q08AM6	VAC14	Protein VAC14 homolog	26	26	41.7	87.985	782	185.39		-5.34535	-5.11413	-0.231225		4.1978	3.91778	0.632662	+	+	+_+			19	26	23	24	23	25	0	0	0	6228000000		NaN	NaN	NaN	28.4481	28.3515	28.4377	28.2878	28.3925	27.8633		tr|A0A0D9QWF5|A0A0D9QWF5_CHLSB Uncharacterized protein OS=Chlorocebus sabaeus GN=VAC14 PE=4 SV=1;sp|Q08AM6|VAC14_HUMAN Protein VAC14 homolog OS=Homo sapiens GN=VAC14 PE=1 SV=1
1610	A0A0D9RGH9;Q03252	LMNB2	Lamin-B2	44	41	61.5	69.987	621	323.31		0.899153	-2.45178	3.35093		0.604595	0.355177	0.49908						41	2	3	3	3	1	1	1	1	6217100000		NaN	NaN	NaN	NaN	22.2376	22.659	22.2158	22.4194	30.9073		tr|A0A0D9RGH9|A0A0D9RGH9_CHLSB Uncharacterized protein OS=Chlorocebus sabaeus GN=LMNB2 PE=3 SV=1;sp|Q03252|LMNB2_HUMAN Lamin-B2 OS=Homo sapiens GN=LMNB2 PE=1 SV=4
3894	P31040;P31040-2;D6RFM5;A0A087X1I3;P31040-3	SDHA	Succinate dehydrogenase [ubiquinone] flavoprotein subunit, mitochondrial	21	21	44.4	72.691	664	103.16		1.29895	1.31004	-0.0110861		1.8513	2.26482	0.0136611						11	17	18	12	12	17	16	13	18	6214100000		28.6438	29.1649	29.314	28.0423	27.9083	27.2752	27.876	27.8384	27.4782		sp|P31040|SDHA_HUMAN Succinate dehydrogenase [ubiquinone] flavoprotein subunit, mitochondrial OS=Homo sapiens GN=SDHA PE=1 SV=2;sp|P31040-2|SDHA_HUMAN Isoform 2 of Succinate dehydrogenase [ubiquinone] flavoprotein subunit, mitochondrial OS=Homo sapiens GN=
1923	A0A0D9RL79;P46109	CRKL	Crk-like protein	17	17	66.7	33.763	303	115.74	184	3.26888	3.26221	0.006663		4.2903	2.82471	0.0052572	+	+	+_+			6	11	9	8	7	8	16	17	17	6201700000		30.0742	30.4714	30.0588	26.7274	26.9439	27.1264	27.5512	27.0767	26.1898		tr|A0A0D9RL79|A0A0D9RL79_CHLSB Uncharacterized protein OS=Chlorocebus sabaeus GN=CRKL PE=4 SV=1;sp|P46109|CRKL_HUMAN Crk-like protein OS=Homo sapiens GN=CRKL PE=1 SV=1
2363	A0A0D9RT64	TBRG4	Uncharacterized protein	32	20	59.4	71.159	631	270.83		-6.43221	-6.1951	-0.23711		4.98135	4.89496	0.301593	+	+	+_+			12	18	19	15	16	18	1	1	1	6181700000		NaN	NaN	NaN	27.9951	28.1966	28.7462	28.214	28.3816	27.6309		tr|A0A0D9RT64|A0A0D9RT64_CHLSB Uncharacterized protein OS=Chlorocebus sabaeus GN=TBRG4 PE=4 SV=1
2144	A0A0D9RPS0;P20700;E9PBF6;A0A0D9SFE5	LMNB1	Lamin-B1	38	35	65.4	66.453	586	323.31		0.0933971	-2.8276	2.921		0.052581	0.390116	0.411484						35	10	5	8	7	4	2	1	0	6143500000		NaN	NaN	21.3392	21.4006	22.1025	22.2204	21.681	21.9675	30.8379		tr|A0A0D9RPS0|A0A0D9RPS0_CHLSB Uncharacterized protein OS=Chlorocebus sabaeus GN=LMNB1 PE=3 SV=1;sp|P20700|LMNB1_HUMAN Lamin-B1 OS=Homo sapiens GN=LMNB1 PE=1 SV=2;tr|E9PBF6|E9PBF6_HUMAN Lamin-B1 OS=Homo sapiens GN=LMNB1 PE=1 SV=1;tr|A0A0D9SFE5|A0A0D9SFE5_H
1130	A0A0D9R8S0;P55084;P55084-2;F5GZQ3;B5MD38	HADHB	Trifunctional enzyme subunit beta, mitochondrial;3-ketoacyl-CoA thiolase	21	21	46.1	51.415	475	156.31		-2.2194	-1.98908	-0.230318		3.39682	3.64023	0.456116	+	+	+_+			17	16	16	17	16	18	4	4	5	6138300000		25.8741	26.1665	26.1654	28.5697	28.3377	27.9567	27.8361	28.0705	28.2666		tr|A0A0D9R8S0|A0A0D9R8S0_CHLSB Uncharacterized protein OS=Chlorocebus sabaeus GN=HADHB PE=3 SV=1;sp|P55084|ECHB_HUMAN Trifunctional enzyme subunit beta, mitochondrial OS=Homo sapiens GN=HADHB PE=1 SV=3;sp|P55084-2|ECHB_HUMAN Isoform 2 of Trifunctional enzy
4249	Q96TA2-3;Q96TA2-2;Q96TA2;Q96I63;A0A0D9RHA7	YME1L1	ATP-dependent zinc metalloprotease YME1L1	23	23	42.6	75.981	683	258.59		-3.31999	-2.62339	-0.696606		2.0582	2.89258	0.394882	+	+	+_+			17	20	21	19	21	20	2	2	2	6105900000		24.9836	24.7492	25.1857	27.4332	27.8048	29.6405	27.8932	27.8985	26.997		sp|Q96TA2-3|YMEL1_HUMAN Isoform 3 of ATP-dependent zinc metalloprotease YME1L1 OS=Homo sapiens GN=YME1L1;sp|Q96TA2-2|YMEL1_HUMAN Isoform 2 of ATP-dependent zinc metalloprotease YME1L1 OS=Homo sapiens GN=YME1L1;sp|Q96TA2|YMEL1_HUMAN ATP-dependent zinc metal
4295	Q9NVI7-2;Q9NVI7;H0Y2W2;Q9NVI7-3;Q5T9A4;Q5T9A4-3	ATAD3A;ATAD3B	ATPase family AAA domain-containing protein 3A;ATPase family AAA domain-containing protein 3B	23	8	31.2	66.217	586	40.019		-5.32791	-5.25946	-0.0684522		2.74477	2.87739	0.0643456	+	+	+_+			7	8	8	8	8	7	2	1	1	6086000000		NaN	NaN	24.1181	27.5018	28.5356	28.4831	28.1765	27.8082	28.3304		sp|Q9NVI7-2|ATD3A_HUMAN Isoform 2 of ATPase family AAA domain-containing protein 3A OS=Homo sapiens GN=ATAD3A;sp|Q9NVI7|ATD3A_HUMAN ATPase family AAA domain-containing protein 3A OS=Homo sapiens GN=ATAD3A PE=1 SV=2;tr|H0Y2W2|H0Y2W2_HUMAN ATPase family AAA
1558	A0A0D9RFU3;Q13535-2;Q13535-3;Q13535	ATR	Serine/threonine-protein kinase ATR	51	51	23.9	301.45	2644	282		-5.54734	-5.44128	-0.106063		6.1242	4.24399	0.134882	+	+	+_+			33	45	46	45	43	45	2	1	1	6035300000		NaN	NaN	NaN	28.2234	28.3462	28.3169	28.4682	28.4857	27.6144		tr|A0A0D9RFU3|A0A0D9RFU3_CHLSB Uncharacterized protein OS=Chlorocebus sabaeus GN=ATR PE=3 SV=1;sp|Q13535-2|ATR_HUMAN Isoform 2 of Serine/threonine-protein kinase ATR OS=Homo sapiens GN=ATR;sp|Q13535-3|ATR_HUMAN Isoform 3 of Serine/threonine-protein kinase
2900	A0A0D9S294;P14625	HSP90B1	Endoplasmin	30	28	42.8	92.598	804	102.84		-0.608256	-0.717996	0.10974		0.741892	1.16531	0.14699						21	21	22	22	20	23	10	7	8	6033500000		27.5768	26.7955	27.644	28.3788	27.9806	27.4818	28.1837	27.862	28.1247		tr|A0A0D9S294|A0A0D9S294_CHLSB Uncharacterized protein OS=Chlorocebus sabaeus GN=HSP90B1 PE=3 SV=1;sp|P14625|ENPL_HUMAN Endoplasmin OS=Homo sapiens GN=HSP90B1 PE=1 SV=1
2755	A0A0D9RZK9;Q5SZE1;Q96G23;Q5SZE3;H0YKH6;Q5SZE4;H0YNU7;Q5SZE2	CERS2	Ceramide synthase 2	6	6	18.9	44.913	380	38.437		-5.87266	-5.79968	-0.0729802		4.20709	3.57497	0.0642775	+	+	+_+			4	5	5	5	6	5	1	1	1	6013700000		NaN	NaN	NaN	27.973	28.3376	28.4316	28.4597	28.6221	27.4414		tr|A0A0D9RZK9|A0A0D9RZK9_CHLSB Uncharacterized protein OS=Chlorocebus sabaeus GN=CERS2 PE=4 SV=1;tr|Q5SZE1|Q5SZE1_HUMAN Ceramide synthase 2 (Fragment) OS=Homo sapiens GN=CERS2 PE=1 SV=2;sp|Q96G23|CERS2_HUMAN Ceramide synthase 2 OS=Homo sapiens GN=CERS2 PE=
2240	A0A0D9RRD7;P61586;C9JNR4;C9JX21	RHOA	Transforming protein RhoA	14	6	82.4	21.768	193	137.67		-1.67357	-0.986115	-0.68745		2.05085	1.2151	1.26013	+					5	6	6	5	5	6	4	3	4	5893900000		26.7347	26.2489	27.351	28.1611	28.551	28.6433	27.5951	28.1801	27.5177		tr|A0A0D9RRD7|A0A0D9RRD7_CHLSB Uncharacterized protein OS=Chlorocebus sabaeus GN=RHOA PE=4 SV=1;sp|P61586|RHOA_HUMAN Transforming protein RhoA OS=Homo sapiens GN=RHOA PE=1 SV=1;tr|C9JNR4|C9JNR4_HUMAN Transforming protein RhoA (Fragment) OS=Homo sapiens GN=
4136	Q6NUK1;Q6NUK1-2;A0A0D9S6L4	SLC25A24	Calcium-binding mitochondrial carrier protein SCaMC-1	20	20	46.1	53.354	477	45.452		-4.0487	-3.81632	-0.232372		1.39213	1.31032	0.526603	+	+	+_+			13	15	15	15	17	14	3	2	3	5877000000		NaN	NaN	26.9008	28.1153	28.2211	28.4225	27.8789	28.3629	27.8201		sp|Q6NUK1|SCMC1_HUMAN Calcium-binding mitochondrial carrier protein SCaMC-1 OS=Homo sapiens GN=SLC25A24 PE=1 SV=2;sp|Q6NUK1-2|SCMC1_HUMAN Isoform 2 of Calcium-binding mitochondrial carrier protein SCaMC-1 OS=Homo sapiens GN=SLC25A24;tr|A0A0D9S6L4|A0A0D9S6L
2609	A0A0D9RXA7;Q9NX40;D6R918;D6RBC5;D6RDI5;D6RA54;D6RC55;D6RG39;D6RIT9;Q9NX40-3;Q9NX40-2;Q9NX40-4	OCIAD1	OCIA domain-containing protein 1	9	9	45.5	27.562	244	76.88		-5.52545	-5.1818	-0.343652		3.60246	3.22892	0.352857	+	+	+_+			8	9	9	7	7	8	0	0	0	5853700000		NaN	NaN	NaN	27.9002	28.5286	28.5427	28.3864	28.26	27.2941		tr|A0A0D9RXA7|A0A0D9RXA7_CHLSB Uncharacterized protein OS=Chlorocebus sabaeus GN=OCIAD1 PE=4 SV=1;sp|Q9NX40|OCAD1_HUMAN OCIA domain-containing protein 1 OS=Homo sapiens GN=OCIAD1 PE=1 SV=1;tr|D6R918|D6R918_HUMAN OCIA domain-containing protein 1 (Fragment)
1727	A0A0D9RIF2;Q5H909;Q9UNF1-2;Q9UNF1;Q5H907	MAGED2	Melanoma-associated antigen D2	21	20	36.5	64.811	606	323.31		-1.31709	-0.991954	-0.325134		1.55447	1.016	0.368603						12	15	19	16	15	15	6	4	6	5769800000		26.5655	26.4228	27.4953	27.797	28.4825	28.1553	28.1973	28.06	27.2022		tr|A0A0D9RIF2|A0A0D9RIF2_CHLSB Uncharacterized protein OS=Chlorocebus sabaeus GN=MAGED2 PE=4 SV=1;tr|Q5H909|Q5H909_HUMAN Melanoma-associated antigen D2 OS=Homo sapiens GN=MAGED2 PE=1 SV=2;sp|Q9UNF1-2|MAGD2_HUMAN Isoform 2 of Melanoma-associated antigen D2
926	A0A0D9R5N7;Q99653;H0YNG9;H0YLY7;H0YKE7;F5GX29	CHP1	Calcineurin B homologous protein 1	11	11	66.2	22.456	195	136.92		-5.27988	-5.0952	-0.184684		2.35521	2.25041	0.225414	+	+	+_+			8	10	10	11	10	9	3	0	1	5735500000		NaN	NaN	24.6933	27.9131	28.3785	28.3904	28.3857	28.2525	27.4898		tr|A0A0D9R5N7|A0A0D9R5N7_CHLSB Uncharacterized protein OS=Chlorocebus sabaeus GN=CHP1 PE=4 SV=1;sp|Q99653|CHP1_HUMAN Calcineurin B homologous protein 1 OS=Homo sapiens GN=CHP1 PE=1 SV=3;tr|H0YNG9|H0YNG9_HUMAN Calcineurin B homologous protein 1 OS=Homo sapi
4339	Q9Y277;A0A0D9RR92;Q9Y277-2;E5RJN6;E5RHZ6;E5RFP6	VDAC3	Voltage-dependent anion-selective channel protein 3	10	10	44.2	30.658	283	94.335		-5.38867	-5.45602	0.0673491		2.64839	2.71315	0.0932322	+	+	+_+			8	10	10	10	10	10	2	0	1	5730500000		NaN	NaN	24.2147	28.5646	28.0691	27.8083	28.1645	28.4632	28.0163		sp|Q9Y277|VDAC3_HUMAN Voltage-dependent anion-selective channel protein 3 OS=Homo sapiens GN=VDAC3 PE=1 SV=1;tr|A0A0D9RR92|A0A0D9RR92_CHLSB Uncharacterized protein OS=Chlorocebus sabaeus GN=VDAC3 PE=4 SV=1;sp|Q9Y277-2|VDAC3_HUMAN Isoform 2 of Voltage-depen
675	A0A0D9R266;Q86XI2;Q86XI2-2;H0Y6U5	NCAPG2	Condensin-2 complex subunit G2	29	29	33.9	130.95	1143	95.606		-5.74395	-5.33659	-0.407363		3.22792	2.76633	0.272638	+	+	+_+			21	25	24	24	23	24	0	2	1	5719800000		23.4762	NaN	NaN	27.6466	28.6282	28.4877	28.7792	27.7582	27.003		tr|A0A0D9R266|A0A0D9R266_CHLSB Uncharacterized protein OS=Chlorocebus sabaeus GN=NCAPG2 PE=4 SV=1;sp|Q86XI2|CNDG2_HUMAN Condensin-2 complex subunit G2 OS=Homo sapiens GN=NCAPG2 PE=1 SV=1;sp|Q86XI2-2|CNDG2_HUMAN Isoform 2 of Condensin-2 complex subunit G2 O
1302	A0A0D9RBI9	HEATR1	Uncharacterized protein	80	23	44.8	242.09	2144	323.31		-5.91473	-5.7001	-0.214629		3.88949	4.42789	0.181539	+	+	+_+			18	22	20	20	22	20	1	0	0	5696400000		NaN	NaN	NaN	27.5349	28.358	28.828	28.1762	28.3534	27.5475		tr|A0A0D9RBI9|A0A0D9RBI9_CHLSB Uncharacterized protein OS=Chlorocebus sabaeus GN=HEATR1 PE=4 SV=1
1299	A0A0D9RBI6;Q27J81-2;Q27J81;A0A0A0MQU1	INF2	Inverted formin-2	29	29	32.8	134.22	1233	323.31		-5.74026	-5.4964	-0.243858		4.89695	4.38503	0.3764	+	+	+_+			20	24	23	24	24	22	1	0	0	5691500000		NaN	NaN	NaN	28.0014	28.4633	28.4043	28.3374	28.2077	27.5923		tr|A0A0D9RBI6|A0A0D9RBI6_CHLSB Uncharacterized protein OS=Chlorocebus sabaeus GN=INF2 PE=4 SV=1;sp|Q27J81-2|INF2_HUMAN Isoform 2 of Inverted formin-2 OS=Homo sapiens GN=INF2;sp|Q27J81|INF2_HUMAN Inverted formin-2 OS=Homo sapiens GN=INF2 PE=1 SV=2;tr|A0A0A0
3325	A0A0D9S9C3;Q9NRR8	CDC42SE1	CDC42 small effector protein 1	5	5	79.7	8.9252	79	39.72		-5.26058	-5.34568	0.0850919		3.94458	3.41785	0.0667227	+	+	+_+			5	5	5	4	3	5	0	0	0	5685600000		NaN	NaN	NaN	28.3258	28.1798	27.6447	28.0691	28.8476	27.4889		tr|A0A0D9S9C3|A0A0D9S9C3_CHLSB Uncharacterized protein OS=Chlorocebus sabaeus GN=CDC42SE1 PE=4 SV=1;sp|Q9NRR8|C42S1_HUMAN CDC42 small effector protein 1 OS=Homo sapiens GN=CDC42SE1 PE=1 SV=1
2613	A0A0D9RXE2;A0A0A0MRJ6;H7BY58;P22061;P22061-2;F6S8N6	PCMT1	Protein-L-isoaspartate O-methyltransferase;Protein-L-isoaspartate(D-aspartate) O-methyltransferase	16	16	54.7	30.317	285	111.03		2.22267	2.20839	0.0142733		4.07528	4.36079	0.028351	+	+	+_+			9	10	10	11	10	11	12	13	13	5682700000		29.8042	29.8829	29.9463	27.3953	27.8066	27.7635	27.8312	27.7113	27.4657		tr|A0A0D9RXE2|A0A0D9RXE2_CHLSB Protein-L-isoaspartate O-methyltransferase OS=Chlorocebus sabaeus GN=PCMT1 PE=3 SV=1;tr|A0A0A0MRJ6|A0A0A0MRJ6_HUMAN Protein-L-isoaspartate O-methyltransferase OS=Homo sapiens GN=PCMT1 PE=1 SV=1;tr|H7BY58|H7BY58_HUMAN Protein-
1256	A0A0D9RAY7;Q92504	SLC39A7	Zinc transporter SLC39A7	3	3	15.1	49.911	469	48.943		-5.08875	-5.05949	-0.0292606		4.01176	3.74267	0.0433937	+	+	+_+			2	2	3	3	2	3	0	0	0	5657600000		NaN	NaN	NaN	28.0077	28.1934	28.3097	28.5334	28.0864	27.8032		tr|A0A0D9RAY7|A0A0D9RAY7_CHLSB Uncharacterized protein OS=Chlorocebus sabaeus GN=SLC39A7 PE=4 SV=1;sp|Q92504|S39A7_HUMAN Zinc transporter SLC39A7 OS=Homo sapiens GN=SLC39A7 PE=1 SV=2
1398	A0A0D9RD61;O15228;O15228-2;Q5TBH8	GNPAT	Dihydroxyacetone phosphate acyltransferase	28	28	43.7	77.347	680	323.31		-4.51181	-3.68039	-0.831418		2.52458	2.3856	1.05324	+	+	+_+			20	26	25	23	23	23	1	2	2	5653400000		24.5007	24.568	NaN	28.7013	28.8602	27.7513	27.8175	27.6407	27.3604		tr|A0A0D9RD61|A0A0D9RD61_CHLSB Dihydroxyacetone phosphate acyltransferase OS=Chlorocebus sabaeus GN=GNPAT PE=3 SV=1;sp|O15228|GNPAT_HUMAN Dihydroxyacetone phosphate acyltransferase OS=Homo sapiens GN=GNPAT PE=1 SV=1;sp|O15228-2|GNPAT_HUMAN Isoform 2 of Dih
275	A0A0D9QW15;P52292	KPNA2	Importin subunit alpha-1	20	20	61.8	57.982	529	259.24		-3.33514	-3.35833	0.0231908		3.64723	4.10782	0.0380577	+	+	+_+			17	16	16	13	13	17	4	4	4	5630700000		24.6196	24.538	25.1274	28.401	27.7514	28.1381	28.2382	27.9559	28.1659		tr|A0A0D9QW15|A0A0D9QW15_CHLSB Importin subunit alpha OS=Chlorocebus sabaeus GN=KPNA2 PE=3 SV=1;sp|P52292|IMA1_HUMAN Importin subunit alpha-1 OS=Homo sapiens GN=KPNA2 PE=1 SV=1
1698	A0A0D9RHX0;P49915;P49915-2	GMPS	GMP synthase [glutamine-hydrolyzing]	27	27	46.3	76.7	693	163.47		1.81535	1.71826	0.0970949		2.54696	3.19487	0.149841	+	+	+_+			16	15	17	15	15	14	22	20	22	5574000000		28.9332	29.3639	29.445	26.9846	27.5789	27.7325	27.6679	27.3928	27.5266		tr|A0A0D9RHX0|A0A0D9RHX0_CHLSB Uncharacterized protein OS=Chlorocebus sabaeus GN=GMPS PE=4 SV=1;sp|P49915|GUAA_HUMAN GMP synthase [glutamine-hydrolyzing] OS=Homo sapiens GN=GMPS PE=1 SV=1;sp|P49915-2|GUAA_HUMAN Isoform 2 of GMP synthase [glutamine-hydrolyz
562	A0A0D9R0E2;Q15019;Q15019-3;Q15019-2;B5MCX3;H7C2Y0;C9J2Q4	SEPT2	Septin-2	20	20	66.2	41.487	361	102.27	218	-2.76246	-1.91048	-0.851983		3.293	2.02769	0.965709	+	+	+_+			14	18	15	17	17	18	4	4	4	5515500000		25.8263	25.2761	25.8304	28.5476	28.0185	28.6542	27.5955	28.1629	26.9059		tr|A0A0D9R0E2|A0A0D9R0E2_CHLSB Uncharacterized protein OS=Chlorocebus sabaeus GN=SEPT2 PE=3 SV=1;sp|Q15019|SEPT2_HUMAN Septin-2 OS=Homo sapiens GN=SEPT2 PE=1 SV=1;sp|Q15019-3|SEPT2_HUMAN Isoform 3 of Septin-2 OS=Homo sapiens GN=SEPT2;sp|Q15019-2|SEPT2_HUMA
1633	A0A0D9RGV9;P60981;F6RFD5;P60981-2	DSTN	Destrin	13	12	80	18.506	165	158.32		2.41398	2.17471	0.239276		3.22545	3.30789	0.567437	+	+	+_+			9	9	9	10	7	8	11	11	11	5510700000		29.5546	29.5229	30.0956	27.6296	27.1583	27.1434	27.6674	27.6268	27.3548		tr|A0A0D9RGV9|A0A0D9RGV9_CHLSB Uncharacterized protein OS=Chlorocebus sabaeus GN=DSTN PE=3 SV=1;sp|P60981|DEST_HUMAN Destrin OS=Homo sapiens GN=DSTN PE=1 SV=3;tr|F6RFD5|F6RFD5_HUMAN Destrin OS=Homo sapiens GN=DSTN PE=1 SV=1;sp|P60981-2|DEST_HUMAN Isoform 2
1961	A0A0D9RLR8;P12004	PCNA	Proliferating cell nuclear antigen	12	12	58.2	28.768	261	231.66		-0.276819	0.282901	-0.55972		1.60444	0.581389	1.195						10	10	8	10	10	8	9	9	9	5504700000		27.8032	27.8595	27.9706	28.1551	28.0472	28.2616	27.8151	27.7972	27.1725		tr|A0A0D9RLR8|A0A0D9RLR8_CHLSB Proliferating cell nuclear antigen OS=Chlorocebus sabaeus GN=PCNA PE=3 SV=1;sp|P12004|PCNA_HUMAN Proliferating cell nuclear antigen OS=Homo sapiens GN=PCNA PE=1 SV=1
3875	P25786;P25786-2;F5GX11;A0A0D9QXF7;B4DEV8	PSMA1	Proteasome subunit alpha type-1;Proteasome subunit alpha type	12	12	59.7	29.555	263	80.036		0.732632	0.515889	0.216742		1.3134	1.2091	0.435851						8	11	11	8	9	10	5	6	5	5495700000		28.588	27.9746	28.3212	27.9451	27.3767	27.364	27.867	27.8766	27.5925		sp|P25786|PSA1_HUMAN Proteasome subunit alpha type-1 OS=Homo sapiens GN=PSMA1 PE=1 SV=1;sp|P25786-2|PSA1_HUMAN Isoform Long of Proteasome subunit alpha type-1 OS=Homo sapiens GN=PSMA1;tr|F5GX11|F5GX11_HUMAN Proteasome subunit alpha type-1 OS=Homo sapiens G
3036	A0A0D9S4L8;Q9UBX3;Q9UBX3-2;F6RGN5	SLC25A10	Mitochondrial dicarboxylate carrier	16	3	56.1	31.295	287	123.42		-1.96678	-1.86808	-0.0987008		2.23173	1.83918	0.0781821	+	+	+_+			3	3	3	3	3	3	2	2	2	5495600000		25.8123	26.55	25.7029	27.5483	28.4254	27.9917	28.551	27.8299	27.2885		tr|A0A0D9S4L8|A0A0D9S4L8_CHLSB Uncharacterized protein OS=Chlorocebus sabaeus GN=SLC25A10 PE=3 SV=1;sp|Q9UBX3|DIC_HUMAN Mitochondrial dicarboxylate carrier OS=Homo sapiens GN=SLC25A10 PE=1 SV=2;sp|Q9UBX3-2|DIC_HUMAN Isoform 2 of Mitochondrial dicarboxylate
3045	A0A0D9S4R7;O00233;J3KN29;F5H5V4;F5GX23;O00233-2	PSMD9	26S proteasome non-ATPase regulatory subunit 9	13	13	59.2	24.671	223	251.09		1.80856	1.79988	0.00867208		3.11479	3.4054	0.0209337	+	+	+_+			7	10	12	10	10	9	11	11	10	5489300000		29.2502	29.1593	29.6545	27.7646	27.5371	27.3366	27.6333	27.4334	27.5977		tr|A0A0D9S4R7|A0A0D9S4R7_CHLSB Uncharacterized protein OS=Chlorocebus sabaeus PE=4 SV=1;sp|O00233|PSMD9_HUMAN 26S proteasome non-ATPase regulatory subunit 9 OS=Homo sapiens GN=PSMD9 PE=1 SV=3;tr|J3KN29|J3KN29_HUMAN 26S proteasome non-ATPase regulatory subu
3311	A0A0D9S8W7;P62873;P62873-2;F6UT28;B3KVK2	GNB1	Guanine nucleotide-binding protein G(I)/G(S)/G(T) subunit beta-1	13	7	51.5	37.377	340	296.82		-2.08586	-1.76866	-0.317204		2.80634	2.99876	0.581613	+	+	+_+			6	7	6	7	7	6	2	1	2	5487300000		25.738	26.2786	26.2048	27.8212	28.1039	28.554	27.9787	27.9384	27.6103		tr|A0A0D9S8W7|A0A0D9S8W7_CHLSB Uncharacterized protein OS=Chlorocebus sabaeus GN=GNB1 PE=4 SV=1;sp|P62873|GBB1_HUMAN Guanine nucleotide-binding protein G(I)/G(S)/G(T) subunit beta-1 OS=Homo sapiens GN=GNB1 PE=1 SV=3;sp|P62873-2|GBB1_HUMAN Isoform 2 of Guan
2323	A0A0D9RSP8;O95292	VAPB	Vesicle-associated membrane protein-associated protein B/C	12	10	49	27.228	243	41.568		-1.6716	-1.29102	-0.380578		1.77588	1.45211	1.19186	+					6	7	5	6	8	6	7	6	4	5459300000		26.7219	25.8131	27.1898	28.0706	28.4855	28.1835	27.8947	27.7069	27.9964		tr|A0A0D9RSP8|A0A0D9RSP8_CHLSB Uncharacterized protein OS=Chlorocebus sabaeus GN=VAPB PE=4 SV=1;sp|O95292|VAPB_HUMAN Vesicle-associated membrane protein-associated protein B/C OS=Homo sapiens GN=VAPB PE=1 SV=3
3268	A0A0D9SDS3;A0A0D9S890;P62913-2;P62913;Q5VVC9;Q5VVC8;A0A0D9SA27	RPL11	60S ribosomal protein L11	6	6	34.7	18.799	167	21.446		1.17187	0.403526	0.768348		2.08119	0.259005	0.588458						6	6	5	5	4	5	6	5	6	5357100000		28.827	28.5831	28.0578	27.1919	27.4711	27.2893	27.4345	27.5859	29.237		tr|A0A0D9SDS3|A0A0D9SDS3_CHLSB Uncharacterized protein OS=Chlorocebus sabaeus PE=3 SV=1;tr|A0A0D9S890|A0A0D9S890_CHLSB Uncharacterized protein OS=Chlorocebus sabaeus PE=3 SV=1;sp|P62913-2|RL11_HUMAN Isoform 2 of 60S ribosomal protein L11 OS=Homo sapiens GN
490	A0A0D9QZF5;H0YD13;P16070-18;P16070-12;P16070-14;P16070-13;P16070-11;P16070-10;P16070-16;P16070-8;P16070-17;P16070-6;P16070-4;P16070-3;P16070-7;P16070-5;P16070;H0Y2P0	CD44	CD44 antigen	9	9	14.4	76.304	699	42.051		-2.82092	-2.26604	-0.554887		3.575	2.78287	1.06908	+	+	+_+			5	8	6	9	7	6	3	3	4	5346100000		25.083	25.7795	25.5639	28.1183	28.4934	28.2775	27.8585	28.0475	27.3185		tr|A0A0D9QZF5|A0A0D9QZF5_CHLSB Uncharacterized protein OS=Chlorocebus sabaeus GN=CD44 PE=4 SV=1;tr|H0YD13|H0YD13_HUMAN CD44 antigen OS=Homo sapiens GN=CD44 PE=1 SV=2;sp|P16070-18|CD44_HUMAN Isoform 18 of CD44 antigen OS=Homo sapiens GN=CD44;sp|P16070-12|CD
1226	A0A0D9RAH6;Q14247;Q14247-3;Q14247-2	CTTN	Src substrate cortactin	18	18	36.9	61.627	550	135.68		2.19457	1.97199	0.22258		2.76202	2.02069	0.204001	+	+	+_+			8	6	9	7	8	7	16	16	15	5335300000		29.6643	30.0095	29.2843	27.0482	27.712	27.6141	27.5225	27.1392	28.3803		tr|A0A0D9RAH6|A0A0D9RAH6_CHLSB Uncharacterized protein OS=Chlorocebus sabaeus GN=CTTN PE=4 SV=1;sp|Q14247|SRC8_HUMAN Src substrate cortactin OS=Homo sapiens GN=CTTN PE=1 SV=2;sp|Q14247-3|SRC8_HUMAN Isoform 3 of Src substrate cortactin OS=Homo sapiens GN=CT
2490	A0A0D9RV06;Q05639	EEF1A2	Elongation factor 1-alpha 2	24	10	71.7	50.47	463	211.84		-0.262025	0.0500698	-0.312094		0.836356	0.325659	1.08051						8	6	8	9	8	9	5	7	5	5325800000		27.7138	27.8415	27.6442	28.2164	28.0137	27.7555	27.6992	27.6331	27.717		tr|A0A0D9RV06|A0A0D9RV06_CHLSB Elongation factor 1-alpha OS=Chlorocebus sabaeus GN=EEF1A2 PE=3 SV=1;sp|Q05639|EF1A2_HUMAN Elongation factor 1-alpha 2 OS=Homo sapiens GN=EEF1A2 PE=1 SV=1
3921	P41743;A0A0D9RJT0	PRKCI	Protein kinase C iota type	19	19	46.6	68.262	596	323.31		-5.49047	-5.43378	-0.0566934		4.1	4.0741	0.0842345	+	+	+_+			17	17	17	16	16	19	2	1	1	5268600000		NaN	NaN	NaN	28.0655	27.6686	28.2315	28.2172	27.9497	27.6287		sp|P41743|KPCI_HUMAN Protein kinase C iota type OS=Homo sapiens GN=PRKCI PE=1 SV=2;tr|A0A0D9RJT0|A0A0D9RJT0_CHLSB Protein kinase C OS=Chlorocebus sabaeus GN=PRKCI PE=3 SV=1
244	A0A0D9QVJ0;O43707;O43707-2	ACTN4	Alpha-actinin-4	53	28	71.1	104.85	911	323.31		1.36106	-1.60516	2.96622		0.808453	0.188209	0.395013						28	5	2	5	3	3	4	9	4	5263000000		24.1888	21.5363	22.7538	21.1913	21.6181	21.5863	20.8715	21.6695	30.7533		tr|A0A0D9QVJ0|A0A0D9QVJ0_CHLSB Uncharacterized protein OS=Chlorocebus sabaeus GN=ACTN4 PE=4 SV=1;sp|O43707|ACTN4_HUMAN Alpha-actinin-4 OS=Homo sapiens GN=ACTN4 PE=1 SV=2;sp|O43707-2|ACTN4_HUMAN Isoform ACTN4ISO of Alpha-actinin-4 OS=Homo sapiens GN=ACTN4
4282	Q9HDC9;H0Y512;Q9HDC9-2	APMAP	Adipocyte plasma membrane-associated protein	12	12	28.8	46.48	416	44.918		-3.47388	-2.98455	-0.489331		4.13241	5.28207	1.06854	+	+	+_+			10	12	11	11	11	12	3	2	3	5243300000		24.782	24.7112	24.8804	28.3569	28.5581	27.8803	27.6234	27.8717	27.8321		sp|Q9HDC9|APMAP_HUMAN Adipocyte plasma membrane-associated protein OS=Homo sapiens GN=APMAP PE=1 SV=2;tr|H0Y512|H0Y512_HUMAN Adipocyte plasma membrane-associated protein (Fragment) OS=Homo sapiens GN=APMAP PE=1 SV=1;sp|Q9HDC9-2|APMAP_HUMAN Isoform 2 of Adi
2890	A0A0D9S238;Q92797;A0A087WUE9	SYMPK	Symplekin	33	33	36.7	141.17	1274	257.56		-3.45374	-3.0781	-0.375641		1.84464	1.53078	0.247673	+	+	+_+			20	30	26	29	29	29	3	2	1	5238600000		25.1356	NaN	25.6395	27.5552	28.061	28.6305	27.661	28.6181	26.8406		tr|A0A0D9S238|A0A0D9S238_CHLSB Uncharacterized protein OS=Chlorocebus sabaeus GN=SYMPK PE=4 SV=1;sp|Q92797|SYMPK_HUMAN Symplekin OS=Homo sapiens GN=SYMPK PE=1 SV=2;tr|A0A087WUE9|A0A087WUE9_HUMAN Symplekin OS=Homo sapiens GN=SYMPK PE=1 SV=1
1815	A0A0D9RJN5;Q9Y2A7;Q9Y2A7-2	NCKAP1	Nck-associated protein 1	29	29	30	128.79	1128	163.56		-1.091	-0.245385	-0.845617		1.64052	0.388721	1.79958						20	23	20	24	27	26	10	5	10	5236400000		26.7162	27.5601	27.1294	28.5242	27.8988	28.2556	27.4131	27.5475	27.1812		tr|A0A0D9RJN5|A0A0D9RJN5_CHLSB Uncharacterized protein OS=Chlorocebus sabaeus GN=NCKAP1 PE=4 SV=1;sp|Q9Y2A7|NCKP1_HUMAN Nck-associated protein 1 OS=Homo sapiens GN=NCKAP1 PE=1 SV=1;sp|Q9Y2A7-2|NCKP1_HUMAN Isoform 2 of Nck-associated protein 1 OS=Homo sapie
546	A0A0D9R056;Q14008-2;Q14008;Q14008-3	CKAP5	Cytoskeleton-associated protein 5	51	51	32.1	225.37	2032	118.34		-5.39854	-5.11206	-0.286479		5.95251	5.085	0.798995	+	+	+_+			41	38	38	35	38	45	5	4	4	5216000000		22.7379	22.774	23.0212	28.3298	28.1082	28.2908	27.6546	28.1023	28.1124		tr|A0A0D9R056|A0A0D9R056_CHLSB Uncharacterized protein OS=Chlorocebus sabaeus GN=CKAP5 PE=4 SV=1;sp|Q14008-2|CKAP5_HUMAN Isoform 2 of Cytoskeleton-associated protein 5 OS=Homo sapiens GN=CKAP5;sp|Q14008|CKAP5_HUMAN Cytoskeleton-associated protein 5 OS=Homo
569	A0A0D9R0H2;O75489	NDUFS3	NADH dehydrogenase [ubiquinone] iron-sulfur protein 3, mitochondrial	14	14	58.9	28.567	248	55.089		-1.33367	-1.24173	-0.0919437		2.49823	1.93364	0.115214	+					10	13	13	12	11	13	3	2	4	5173700000		26.4186	26.4603	26.8608	27.6015	28.0539	28.0853	27.8599	28.2241	27.3809		tr|A0A0D9R0H2|A0A0D9R0H2_CHLSB Uncharacterized protein OS=Chlorocebus sabaeus GN=NDUFS3 PE=3 SV=1;sp|O75489|NDUS3_HUMAN NADH dehydrogenase [ubiquinone] iron-sulfur protein 3, mitochondrial OS=Homo sapiens GN=NDUFS3 PE=1 SV=1
1154	A0A0D9R925;Q12907;D6RBV2;D6RDX1;D6RIU4	LMAN2	Vesicular integral-membrane protein VIP36	16	16	52.8	40.202	356	180.83		-3.37898	-3.22526	-0.153721		3.61774	3.29695	0.234744	+	+	+_+			12	16	13	12	14	15	3	2	4	5163600000		25.1031	24.5513	24.328	28.328	27.9143	27.8771	27.6094	28.3048	27.744		tr|A0A0D9R925|A0A0D9R925_CHLSB Uncharacterized protein OS=Chlorocebus sabaeus GN=LMAN2 PE=4 SV=1;sp|Q12907|LMAN2_HUMAN Vesicular integral-membrane protein VIP36 OS=Homo sapiens GN=LMAN2 PE=1 SV=1;tr|D6RBV2|D6RBV2_HUMAN Vesicular integral-membrane protein V
1614	A0A0D9RGJ5;P62263;E5RH77;H0YB22	RPS14	40S ribosomal protein S14	8	8	70.9	16.291	151	85.082		0.619693	0.0187251	0.600968		0.928696	0.0211717	1.64209						7	6	6	5	4	6	5	7	8	5151100000		28.4478	28.1734	27.5062	27.1952	27.6723	27.4008	27.9263	27.9335	28.2114		tr|A0A0D9RGJ5|A0A0D9RGJ5_CHLSB Uncharacterized protein OS=Chlorocebus sabaeus GN=RPS14 PE=3 SV=1;sp|P62263|RS14_HUMAN 40S ribosomal protein S14 OS=Homo sapiens GN=RPS14 PE=1 SV=3;tr|E5RH77|E5RH77_HUMAN 40S ribosomal protein S14 OS=Homo sapiens GN=RPS14 PE=
1981	E5RHG8;A0A0D9RM37;Q15369;Q15369-2;R4GMY8	TCEB1	Transcription elongation factor B polypeptide 1	6	6	83.1	9.9601	89	62.306		0.129536	-0.206331	0.335867		0.297805	0.797196	1.02026						6	6	6	6	6	6	5	4	4	5084900000		27.793	27.6192	27.9789	27.8634	27.7493	27.3898	27.9898	28.1121	27.9082		tr|E5RHG8|E5RHG8_HUMAN Transcription elongation factor B polypeptide 1 (Fragment) OS=Homo sapiens GN=TCEB1 PE=1 SV=1;tr|A0A0D9RM37|A0A0D9RM37_CHLSB Uncharacterized protein OS=Chlorocebus sabaeus GN=TCEB1 PE=3 SV=1;sp|Q15369|ELOC_HUMAN Transcription elongat
2771	A0A0D9RZW1;P61981	YWHAG	14-3-3 protein gamma;14-3-3 protein gamma, N-terminally processed	14	9	58.7	28.302	247	174.1		-0.254093	-0.294451	0.0403582		0.547977	0.724367	0.0985834						7	7	7	7	7	7	7	6	6	5059900000		27.451	27.3527	27.8927	28.0569	27.6657	27.736	28.0274	27.7688	27.7835		tr|A0A0D9RZW1|A0A0D9RZW1_CHLSB Uncharacterized protein OS=Chlorocebus sabaeus GN=YWHAG PE=3 SV=1;sp|P61981|1433G_HUMAN 14-3-3 protein gamma OS=Homo sapiens GN=YWHAG PE=1 SV=2
1903	A0A0D9RKY1;P35221;P35221-2;G3XAM7	CTNNA1	Catenin alpha-1	33	26	55	100.13	906	323.31		-2.41718	-2.25841	-0.158766		3.01472	2.73483	0.295745	+	+	+_+			21	22	20	21	22	22	7	5	3	5050600000		26.148	25.3579	25.4463	28.257	27.8389	28.1078	27.6706	27.7949	28.2619		tr|A0A0D9RKY1|A0A0D9RKY1_CHLSB Uncharacterized protein OS=Chlorocebus sabaeus GN=CTNNA1 PE=4 SV=1;sp|P35221|CTNA1_HUMAN Catenin alpha-1 OS=Homo sapiens GN=CTNNA1 PE=1 SV=1;sp|P35221-2|CTNA1_HUMAN Isoform 2 of Catenin alpha-1 OS=Homo sapiens GN=CTNNA1;tr|G3
918	A0A0D9R5K0;P49790;P49790-3;P49790-2	NUP153	Nuclear pore complex protein Nup153	36	36	34.6	153.65	1473	323.31		-4.52339	-5.21994	0.696543		3.24044	3.43615	0.67042	+	+	+_+			32	31	24	22	24	24	1	1	3	5049900000		NaN	23.6468	NaN	26.9546	28.0729	27.6139	27.7936	28.0228	28.9146		tr|A0A0D9R5K0|A0A0D9R5K0_CHLSB Uncharacterized protein OS=Chlorocebus sabaeus GN=NUP153 PE=4 SV=1;sp|P49790|NU153_HUMAN Nuclear pore complex protein Nup153 OS=Homo sapiens GN=NUP153 PE=1 SV=2;sp|P49790-3|NU153_HUMAN Isoform 3 of Nuclear pore complex protei
1221	A0A0D9RAG2;Q96CS3	FAF2	FAS-associated factor 2	17	17	54.2	52.651	445	292.95		-4.75647	-4.64287	-0.1136		2.32465	2.20251	0.0873203	+	+	+_+			10	15	14	12	12	14	2	1	1	5039300000		NaN	NaN	24.3849	27.1947	28.0001	27.9368	27.8366	28.1068	26.8473		tr|A0A0D9RAG2|A0A0D9RAG2_CHLSB Uncharacterized protein OS=Chlorocebus sabaeus GN=FAF2 PE=4 SV=1;sp|Q96CS3|FAF2_HUMAN FAS-associated factor 2 OS=Homo sapiens GN=FAF2 PE=1 SV=2
262	A0A0D9QVU5;P52306;P52306-5;P52306-4;P52306-6;P52306-2;P52306-3	RAP1GDS1	Rap1 GTPase-GDP dissociation stimulator 1	22	22	49.8	66.288	607	323.31		-5.52869	-4.76743	-0.761261		2.6652	2.34147	1.11808	+	+	+_+			17	22	20	19	19	22	3	3	3	5033100000		24.2487	21.7493	22.1382	28.1807	28.4857	28.0559	27.5267	27.9628	26.9489		tr|A0A0D9QVU5|A0A0D9QVU5_CHLSB Uncharacterized protein OS=Chlorocebus sabaeus GN=RAP1GDS1 PE=4 SV=1;sp|P52306|GDS1_HUMAN Rap1 GTPase-GDP dissociation stimulator 1 OS=Homo sapiens GN=RAP1GDS1 PE=1 SV=3;sp|P52306-5|GDS1_HUMAN Isoform 5 of Rap1 GTPase-GDP dis
703	A0A0D9R2K6;Q7L576;A0A0G2JR96;A0A0G2JQT1	CYFIP1	Cytoplasmic FMR1-interacting protein 1	37	22	32.2	145.15	1253	103.32		-0.771232	-0.0873292	-0.683903		1.90075	0.221903	1.41191						15	17	19	15	17	18	7	8	7	4957900000		27.2823	27.2885	27.4311	28.0055	27.8694	28.4408	27.4637	27.6497	27.1505		tr|A0A0D9R2K6|A0A0D9R2K6_CHLSB Uncharacterized protein OS=Chlorocebus sabaeus GN=CYFIP1 PE=4 SV=1;sp|Q7L576|CYFP1_HUMAN Cytoplasmic FMR1-interacting protein 1 OS=Homo sapiens GN=CYFIP1 PE=1 SV=1;tr|A0A0G2JR96|A0A0G2JR96_HUMAN Cytoplasmic FMR1-interacting p
784	A0A0D9R3P2;P62081;A0A0D9S9I2;B5MCP9	RPS7	40S ribosomal protein S7	9	9	60.8	22.127	194	177.95		0.668725	0.289184	0.379541		0.80965	0.183638	0.224707						8	8	8	8	7	8	8	8	7	4948500000		28.3801	28.1793	27.7428	26.8297	27.4886	27.9777	27.3714	27.1207	28.9425		tr|A0A0D9R3P2|A0A0D9R3P2_CHLSB Uncharacterized protein OS=Chlorocebus sabaeus PE=4 SV=1;sp|P62081|RS7_HUMAN 40S ribosomal protein S7 OS=Homo sapiens GN=RPS7 PE=1 SV=1;tr|A0A0D9S9I2|A0A0D9S9I2_CHLSB Uncharacterized protein OS=Chlorocebus sabaeus PE=4 SV=1;t
3657	G8JLB6;P31943;A0A0D9R7T1;E9PCY7;D6RBM0;D6RIU0;D6RFM3;D6RIT2;D6RAM1;E5RGV0;D6R9T0;D6RDU3;D6RJ04;D6RIH9	HNRNPH1	Heterogeneous nuclear ribonucleoprotein H;Heterogeneous nuclear ribonucleoprotein H, N-terminally processed	26	11	59.3	51.229	472	323.31		0.367498	-0.296291	0.663789		1.19755	0.548452	1.1483						11	9	10	6	8	8	5	6	9	4940200000		27.5379	27.5889	27.4363	27.4218	26.9705	27.0682	27.6411	27.5285	28.2823		tr|G8JLB6|G8JLB6_HUMAN Heterogeneous nuclear ribonucleoprotein H OS=Homo sapiens GN=HNRNPH1 PE=1 SV=1;sp|P31943|HNRH1_HUMAN Heterogeneous nuclear ribonucleoprotein H OS=Homo sapiens GN=HNRNPH1 PE=1 SV=4;tr|A0A0D9R7T1|A0A0D9R7T1_CHLSB Uncharacterized protei
1480	A0A0D9REE9;J9JIE6;Q9UM00;Q9UM00-2;J3QQY2;J3KS45	TMCO1	Transmembrane and coiled-coil domain-containing protein 1	5	5	28.7	21.175	188	16.985		-2.17953	-1.77468	-0.404856		0.717379	0.566272	0.907749						4	3	4	4	5	5	2	1	2	4936600000		NaN	27.0023	27.1237	27.6562	28.1025	27.8215	27.3907	27.7631	27.2119		tr|A0A0D9REE9|A0A0D9REE9_CHLSB Uncharacterized protein OS=Chlorocebus sabaeus GN=TMCO1 PE=4 SV=1;tr|J9JIE6|J9JIE6_HUMAN Calcium load-activated calcium channel OS=Homo sapiens GN=TMCO1 PE=1 SV=1;sp|Q9UM00|TMCO1_HUMAN Calcium load-activated calcium channel O
2981	A0A0D9S3N4;P48444;B0YIW6;P48444-2	ARCN1	Coatomer subunit delta	20	20	40.5	57.178	511	70.147		-3.97727	-4.02148	0.0442053		3.20326	3.90615	0.0405219	+	+	+_+			16	18	18	16	15	17	3	2	1	4928000000		24.0135	NaN	24.2569	28.0332	28.4017	27.2508	28.2386	27.7676	27.8121		tr|A0A0D9S3N4|A0A0D9S3N4_CHLSB Uncharacterized protein OS=Chlorocebus sabaeus GN=ARCN1 PE=3 SV=1;sp|P48444|COPD_HUMAN Coatomer subunit delta OS=Homo sapiens GN=ARCN1 PE=1 SV=1;tr|B0YIW6|B0YIW6_HUMAN Archain 1, isoform CRA_a OS=Homo sapiens GN=ARCN1 PE=1 SV
2963	J3QR09;J3KTE4;A0A0D9S3C9;P84098;A0A0D9RIF7	RPL19	Ribosomal protein L19;60S ribosomal protein L19	9	9	32.1	23.134	193	38.758		0.992577	-0.200518	1.19309		1.24147	0.10895	0.859284						8	7	9	7	6	6	3	6	5	4898500000		27.4052	28.208	27.2895	26.1681	26.812	26.9448	26.9497	27.5772	28.9773		tr|J3QR09|J3QR09_HUMAN Ribosomal protein L19 OS=Homo sapiens GN=RPL19 PE=1 SV=1;tr|J3KTE4|J3KTE4_HUMAN Ribosomal protein L19 OS=Homo sapiens GN=RPL19 PE=1 SV=1;tr|A0A0D9S3C9|A0A0D9S3C9_CHLSB Ribosomal protein L19 OS=Chlorocebus sabaeus GN=RPL19 PE=3 SV=1;s
1470	A0A0D9RE73;P09496-2;P09496-4;P09496-3;P09496;F8WF69;P09496-5;C9J8P9	CLTA	Clathrin light chain A	8	8	35.3	23.69	218	91.566		0.315545	-0.236896	0.552441		0.19473	0.362742	0.393428						7	7	6	6	6	8	5	4	6	4887100000		27.2934	27.4907	28.0737	28.4154	27.0114	26.4844	28.0985	27.616	27.8539		tr|A0A0D9RE73|A0A0D9RE73_CHLSB Clathrin light chain OS=Chlorocebus sabaeus GN=CLTA PE=3 SV=1;sp|P09496-2|CLCA_HUMAN Isoform Non-brain of Clathrin light chain A OS=Homo sapiens GN=CLTA;sp|P09496-4|CLCA_HUMAN Isoform 4 of Clathrin light chain A OS=Homo sapie
3910	P36578;H3BM89;A0A0D9RL86	RPL4	60S ribosomal protein L4	21	21	48.9	47.697	427	148.02		0.945145	-0.171144	1.11629		2.53846	0.0641748	0.536738						19	16	16	14	15	16	8	8	8	4879500000		27.7681	27.4071	27.2978	26.6037	26.5372	26.4967	26.7218	26.7689	29.4957		sp|P36578|RL4_HUMAN 60S ribosomal protein L4 OS=Homo sapiens GN=RPL4 PE=1 SV=5;tr|H3BM89|H3BM89_HUMAN 60S ribosomal protein L4 OS=Homo sapiens GN=RPL4 PE=1 SV=1;tr|A0A0D9RL86|A0A0D9RL86_CHLSB Uncharacterized protein OS=Chlorocebus sabaeus PE=4 SV=1
1866	A0A0D9RKI6;Q02978;I3L1P8;Q02978-2	SLC25A11	Mitochondrial 2-oxoglutarate/malate carrier protein	15	15	62.4	34.121	314	68.861		-1.68332	-1.67058	-0.0127328		2.84258	3.30386	0.0175284	+	+	+_+			9	14	13	12	12	13	5	2	6	4879400000		26.0333	25.8663	25.7426	27.8812	27.6102	27.2007	27.7227	27.6533	27.2779		tr|A0A0D9RKI6|A0A0D9RKI6_CHLSB Uncharacterized protein OS=Chlorocebus sabaeus GN=SLC25A11 PE=3 SV=1;sp|Q02978|M2OM_HUMAN Mitochondrial 2-oxoglutarate/malate carrier protein OS=Homo sapiens GN=SLC25A11 PE=1 SV=3;tr|I3L1P8|I3L1P8_HUMAN Mitochondrial 2-oxoglu
3984	P62258;A0A0D9RNM2;P62258-2;B4DJF2;I3L3T1	YWHAE	14-3-3 protein epsilon	14	11	56.1	29.174	255	84.521		-0.64791	-0.702886	0.0549761		0.865617	0.975512	0.14244						8	10	10	10	8	9	5	6	5	4865400000		27.3318	26.4246	27.4691	27.9306	27.7156	27.5231	27.8491	27.6158	27.8693		sp|P62258|1433E_HUMAN 14-3-3 protein epsilon OS=Homo sapiens GN=YWHAE PE=1 SV=1;tr|A0A0D9RNM2|A0A0D9RNM2_CHLSB Uncharacterized protein OS=Chlorocebus sabaeus GN=YWHAE PE=3 SV=1;sp|P62258-2|1433E_HUMAN Isoform SV of 14-3-3 protein epsilon OS=Homo sapiens GN
3826	P08240;A0A0D9S4H6;P08240-2	SRPR	Signal recognition particle receptor subunit alpha	22	22	39.5	69.81	638	81.394		-4.37206	-4.04983	-0.322229		5.54201	4.14399	0.667437	+	+	+_+			15	20	17	17	18	20	4	3	3	4853100000		23.9487	23.5822	23.7273	28.1453	28.0412	28.1879	27.5009	28.2177	27.6891		sp|P08240|SRPRA_HUMAN Signal recognition particle receptor subunit alpha OS=Homo sapiens GN=SRPRA PE=1 SV=2;tr|A0A0D9S4H6|A0A0D9S4H6_CHLSB Uncharacterized protein OS=Chlorocebus sabaeus GN=SRPRA PE=4 SV=1;sp|P08240-2|SRPRA_HUMAN Isoform 2 of Signal recogni
3240	A0A0D9S7Y1;Q07666;Q07666-2;Q07666-3	KHDRBS1	KH domain-containing, RNA-binding, signal transduction-associated protein 1	15	13	31.6	58.825	547	225.96		1.67294	0.878166	0.794774		3.19248	0.557662	0.482129	+					12	8	9	8	7	9	8	8	6	4846400000		28.5929	28.5247	28.6818	26.9091	27.2247	26.6468	27.2141	26.8515	29.0993		tr|A0A0D9S7Y1|A0A0D9S7Y1_CHLSB Uncharacterized protein OS=Chlorocebus sabaeus GN=KHDRBS1 PE=4 SV=1;sp|Q07666|KHDR1_HUMAN KH domain-containing, RNA-binding, signal transduction-associated protein 1 OS=Homo sapiens GN=KHDRBS1 PE=1 SV=1;sp|Q07666-2|KHDR1_HUMA
221	A0A0D9QV93;P23396;P23396-2;E9PL09;E9PPU1;H0YEU2;F2Z2S8;H0YCJ7;H0YF32	RPS3	40S ribosomal protein S3	19	19	77	26.688	243	187.21		0.542978	-0.268827	0.811805		0.90179	0.154429	0.616401						17	16	13	14	16	15	6	10	9	4845000000		27.8227	27.696	26.938	26.8458	27.019	26.9629	27.1348	27.1958	28.9325		tr|A0A0D9QV93|A0A0D9QV93_CHLSB Uncharacterized protein OS=Chlorocebus sabaeus GN=RPS3 PE=3 SV=1;sp|P23396|RS3_HUMAN 40S ribosomal protein S3 OS=Homo sapiens GN=RPS3 PE=1 SV=2;sp|P23396-2|RS3_HUMAN Isoform 2 of 40S ribosomal protein S3 OS=Homo sapiens GN=RP
4202	Q8TEX9;Q8TEX9-2;H0YN14	IPO4	Importin-4	36	9	41	118.71	1081	86.92		-5.19958	-4.702	-0.497578		4.05578	3.76278	0.854405	+	+	+_+			8	6	7	7	6	8	1	0	0	4836500000		NaN	NaN	NaN	28.4457	27.8598	28.1765	27.2428	27.9087	27.8377		sp|Q8TEX9|IPO4_HUMAN Importin-4 OS=Homo sapiens GN=IPO4 PE=1 SV=2;sp|Q8TEX9-2|IPO4_HUMAN Isoform 2 of Importin-4 OS=Homo sapiens GN=IPO4;tr|H0YN14|H0YN14_HUMAN Importin-4 OS=Homo sapiens GN=IPO4 PE=1 SV=1
893	A0A0D9R533;O15397;O15397-2	IPO8	Importin-8	24	23	31.8	119.96	1037	144.65		-5.67587	-5.07484	-0.601034		3.31309	3.04557	1.44557	+	+	+_+			20	18	18	17	17	20	1	0	0	4820400000		NaN	NaN	NaN	28.1106	28.2579	28.3154	27.6146	27.9504	27.3157		tr|A0A0D9R533|A0A0D9R533_CHLSB Uncharacterized protein OS=Chlorocebus sabaeus GN=IPO8 PE=4 SV=1;sp|O15397|IPO8_HUMAN Importin-8 OS=Homo sapiens GN=IPO8 PE=1 SV=2;sp|O15397-2|IPO8_HUMAN Isoform 2 of Importin-8 OS=Homo sapiens GN=IPO8
2055	A0A0D9RNE4;Q9NRR3;D6REL0	CDC42SE2	CDC42 small effector protein 2	2	2	66.7	9.2234	84	234.65		-4.77415	-4.41773	-0.356422		3.36782	3.18931	0.677953	+	+	+_+			2	2	2	2	2	2	0	0	0	4820300000		NaN	NaN	NaN	27.1337	27.4569	27.6504	27.3219	27.1496	26.7003		tr|A0A0D9RNE4|A0A0D9RNE4_CHLSB Uncharacterized protein OS=Chlorocebus sabaeus GN=CDC42SE2 PE=4 SV=1;sp|Q9NRR3|C42S2_HUMAN CDC42 small effector protein 2 OS=Homo sapiens GN=CDC42SE2 PE=1 SV=1;tr|D6REL0|D6REL0_HUMAN CDC42 small effector protein 2 OS=Homo sap
4075	Q15363;F5GX39;E7EQ72;A0A0D9S536	TMED2	Transmembrane emp24 domain-containing protein 2	8	8	43.3	22.761	201	85.336		-3.18725	-2.41771	-0.769544		1.23999	0.919963	0.906125	+					8	8	8	8	8	8	2	1	2	4802900000		NaN	25.7966	26.2566	27.8364	28.4981	27.7755	27.2987	27.808	26.6947		sp|Q15363|TMED2_HUMAN Transmembrane emp24 domain-containing protein 2 OS=Homo sapiens GN=TMED2 PE=1 SV=1;tr|F5GX39|F5GX39_HUMAN Transmembrane emp24 domain-containing protein 2 OS=Homo sapiens GN=TMED2 PE=1 SV=1;tr|E7EQ72|E7EQ72_HUMAN Transmembrane emp24 do
255	A0A0D9QVQ1;Q9UL25	RAB21	Ras-related protein Rab-21	11	11	54.7	24.263	223	281.86		-0.234193	0.11556	-0.349753		0.249368	0.146246	0.496853						8	11	9	10	10	11	7	7	7	4796700000		27.316	27.4684	28.1464	28.4104	27.6949	27.528	27.518	27.7847	27.2813		tr|A0A0D9QVQ1|A0A0D9QVQ1_CHLSB Uncharacterized protein OS=Chlorocebus sabaeus GN=RAB21 PE=4 SV=1;sp|Q9UL25|RAB21_HUMAN Ras-related protein Rab-21 OS=Homo sapiens GN=RAB21 PE=1 SV=3
854	A0A0D9R4K9;Q15084-3;Q15084;Q15084-4;Q15084-5;Q15084-2	PDIA6	Protein disulfide-isomerase A6	12	12	35.7	48.059	440	84.424		1.60996	1.4579	0.152053		3.77189	2.22827	0.209949	+					8	11	9	9	8	9	10	9	10	4780600000		28.6734	28.7154	28.9003	27.3422	27.0334	27.0836	27.6665	27.4573	26.7915		tr|A0A0D9R4K9|A0A0D9R4K9_CHLSB Uncharacterized protein OS=Chlorocebus sabaeus GN=PDIA6 PE=3 SV=1;sp|Q15084-3|PDIA6_HUMAN Isoform 3 of Protein disulfide-isomerase A6 OS=Homo sapiens GN=PDIA6;sp|Q15084|PDIA6_HUMAN Protein disulfide-isomerase A6 OS=Homo sapie
613	A0A0D9R171;O94826	TOMM70A	Mitochondrial import receptor subunit TOM70	24	24	51	67.442	608	119.28		-2.84231	-3.19978	0.357471		1.1149	1.20077	0.333831	+	+	+_+			18	18	18	19	18	18	2	2	0	4719600000		25.8863	NaN	25.9591	27.2511	27.8644	27.6236	28.6858	27.8258	27.2998		tr|A0A0D9R171|A0A0D9R171_CHLSB Uncharacterized protein OS=Chlorocebus sabaeus GN=TOMM70 PE=4 SV=1;sp|O94826|TOM70_HUMAN Mitochondrial import receptor subunit TOM70 OS=Homo sapiens GN=TOMM70 PE=1 SV=1
2965	A0A0D9S3D8;O75306-2;O75306	NDUFS2	NADH dehydrogenase [ubiquinone] iron-sulfur protein 2, mitochondrial	11	11	27.9	52.52	463	85.544		-2.17078	-2.03232	-0.138468		3.88285	2.12406	0.120517	+	+	+_+			8	10	11	10	9	11	3	3	3	4719200000		25.7429	25.7321	25.5028	28.0649	27.6269	27.7983	27.9242	28.2368	26.9138		tr|A0A0D9S3D8|A0A0D9S3D8_CHLSB Uncharacterized protein OS=Chlorocebus sabaeus GN=NDUFS2 PE=3 SV=1;sp|O75306-2|NDUS2_HUMAN Isoform 2 of NADH dehydrogenase [ubiquinone] iron-sulfur protein 2, mitochondrial OS=Homo sapiens GN=NDUFS2;sp|O75306|NDUS2_HUMAN NADH
4011	P83436;A0A0D9R3F3	COG7	Conserved oligomeric Golgi complex subunit 7	24	24	42.7	86.343	770	323.31		-5.42587	-5.07604	-0.349833		3.41046	3.16516	0.789304	+	+	+_+			18	19	19	18	17	22	0	0	1	4704500000		NaN	NaN	NaN	28.0887	28.0587	28.0709	27.7341	28.0712	27.3634		sp|P83436|COG7_HUMAN Conserved oligomeric Golgi complex subunit 7 OS=Homo sapiens GN=COG7 PE=1 SV=1;tr|A0A0D9R3F3|A0A0D9R3F3_CHLSB Uncharacterized protein OS=Chlorocebus sabaeus GN=COG7 PE=4 SV=1
2739	A0A0D9RZC5;Q92598-2;Q92598;Q92598-4;Q92598-3;A0A0A0MSM0	HSPH1	Heat shock protein 105 kDa	32	28	44.8	96.91	858	323.31		0.269393	0.534493	-0.2651		0.741678	3.44115	0.733037						21	22	22	17	18	21	14	15	12	4695600000		28.0277	28.1463	28.0541	28.0446	27.4954	27.88	27.6013	27.495	27.5284		tr|A0A0D9RZC5|A0A0D9RZC5_CHLSB Uncharacterized protein OS=Chlorocebus sabaeus GN=HSPH1 PE=3 SV=1;sp|Q92598-2|HS105_HUMAN Isoform Beta of Heat shock protein 105 kDa OS=Homo sapiens GN=HSPH1;sp|Q92598|HS105_HUMAN Heat shock protein 105 kDa OS=Homo sapiens GN
1761	A0A0D9RIV1;P62888;E5RI99	RPL30	60S ribosomal protein L30	7	7	66.1	12.77	115	213.42		1.94342	1.6753	0.268121		2.09194	1.31049	0.197348	+					5	5	5	5	5	4	6	7	7	4675900000		29.2408	29.6222	28.4382	26.8096	27.1974	27.4639	26.8926	26.9858	28.3969		tr|A0A0D9RIV1|A0A0D9RIV1_CHLSB Uncharacterized protein OS=Chlorocebus sabaeus GN=RPL30 PE=3 SV=1;sp|P62888|RL30_HUMAN 60S ribosomal protein L30 OS=Homo sapiens GN=RPL30 PE=1 SV=2;tr|E5RI99|E5RI99_HUMAN 60S ribosomal protein L30 (Fragment) OS=Homo sapiens G
5	A0A024R4M0;P46781;A0A0D9SBN8;B5MCT8;C9JM19	RPS9	40S ribosomal protein S9	17	17	58.8	22.591	194	33.812		-0.137423	-0.760503	0.623081		0.191629	0.625817	0.534882						14	14	13	14	13	15	7	9	6	4675200000		27.2562	27.4156	26.6436	27.3604	27.4072	26.9601	27.2133	27.5501	28.8336		tr|A0A024R4M0|A0A024R4M0_HUMAN 40S ribosomal protein S9 OS=Homo sapiens GN=RPS9 PE=1 SV=1;sp|P46781|RS9_HUMAN 40S ribosomal protein S9 OS=Homo sapiens GN=RPS9 PE=1 SV=3;tr|A0A0D9SBN8|A0A0D9SBN8_CHLSB Uncharacterized protein OS=Chlorocebus sabaeus GN=RPS9 P
2161	A0A0D9RQ20;Q86UP2-3;Q86UP2-4;Q86UP2;Q86UP2-2	KTN1	Kinectin	35	35	32.8	153.08	1329	143.56		-1.32894	-1.24071	-0.0882263		1.64567	1.53574	0.306662						27	24	26	26	25	29	14	10	7	4657600000		26.2334	26.0665	27.2237	27.9813	27.7497	27.7794	27.8525	27.5653	27.8279		tr|A0A0D9RQ20|A0A0D9RQ20_CHLSB Uncharacterized protein OS=Chlorocebus sabaeus GN=KTN1 PE=4 SV=1;sp|Q86UP2-3|KTN1_HUMAN Isoform 3 of Kinectin OS=Homo sapiens GN=KTN1;sp|Q86UP2-4|KTN1_HUMAN Isoform 4 of Kinectin OS=Homo sapiens GN=KTN1;sp|Q86UP2|KTN1_HUMAN K
2360	A0A0D9S9R8	H2AFV;H2AFZ	Histone H2A.V;Histone H2A.Z;Histone H2A	6	4	53.9	13.553	128	81.85		0.0429198	-2.16041	2.20333		0.058892	0.379418	0.385783						3	2	2	2	2	2	1	1	1	4637300000		NaN	NaN	23.3629	22.8618	23.6323	23.5965	23.049	23.3041	30.3475		tr|A0A0D9S9R8|A0A0D9S9R8_CHLSB Histone H2A OS=Chlorocebus sabaeus GN=H2AFZ PE=3 SV=1
1833	A0A0D9RJZ5;P26599;P26599-2;P26599-3;A6NLN1;A0A0U1RRM4	PTBP1	Polypyrimidine tract-binding protein 1	20	17	56.7	59.561	556	323.31		1.86113	0.819073	1.04205		3.84666	0.373378	0.500235	+					17	10	11	8	11	10	10	9	11	4634200000		27.9553	28.3764	28.3065	26.3488	26.3303	26.3758	26.7171	26.2688	29.1951		tr|A0A0D9RJZ5|A0A0D9RJZ5_CHLSB Uncharacterized protein OS=Chlorocebus sabaeus GN=PTBP1 PE=4 SV=1;sp|P26599|PTBP1_HUMAN Polypyrimidine tract-binding protein 1 OS=Homo sapiens GN=PTBP1 PE=1 SV=1;sp|P26599-2|PTBP1_HUMAN Isoform 2 of Polypyrimidine tract-bindi
2015	A0A0D9RMP3;O43156	TTI1	TELO2-interacting protein 1 homolog	27	27	32.7	122.19	1089	299.79		-5.9196	-5.62697	-0.292629		5.66977	4.87807	0.58053	+	+	+_+			19	24	24	22	22	26	0	1	0	4592500000		NaN	NaN	NaN	27.8124	27.9645	28.1909	27.9853	27.7819	27.3228		tr|A0A0D9RMP3|A0A0D9RMP3_CHLSB Uncharacterized protein OS=Chlorocebus sabaeus GN=TTI1 PE=4 SV=1;sp|O43156|TTI1_HUMAN TELO2-interacting protein 1 homolog OS=Homo sapiens GN=TTI1 PE=1 SV=3
1519	A0A0D9RF66	RNH1	Uncharacterized protein	23	23	77.9	49.173	456	259.61		0.84839	0.708952	0.139438		1.02212	1.59729	0.140647						17	14	12	8	16	17	18	15	16	4565400000		28.0327	28.4603	28.6016	28.2165	27.1824	27.1505	27.5979	27.5006	27.8693		tr|A0A0D9RF66|A0A0D9RF66_CHLSB Uncharacterized protein OS=Chlorocebus sabaeus GN=RNH1 PE=4 SV=1
4305	Q9NZT1	CALML5	Calmodulin-like protein 5	11	11	67.1	15.892	146	313.04		3.6331	3.7961	-0.162996		1.42455	1.70766	0.0485658	+	+	+_+			5	3	4	3	3	6	9	11	9	4557200000		30.6974	28.1736	29.844	27.7924	24.9849	25.0384	25.9923	24.5017	26.8327		sp|Q9NZT1|CALL5_HUMAN Calmodulin-like protein 5 OS=Homo sapiens GN=CALML5 PE=1 SV=2
2368	A0A0D9RT77;O14818;O14818-2;H0Y586	PSMA7	Proteasome subunit alpha type-7	13	13	55.2	27.897	248	63.675		-0.0558701	-0.131799	0.075929		0.138935	0.256178	0.186981						13	13	13	12	12	12	7	11	10	4554700000		27.7921	27.341	27.4027	27.5041	27.5407	27.6587	27.7134	27.858	27.3598		tr|A0A0D9RT77|A0A0D9RT77_CHLSB Proteasome subunit alpha type OS=Chlorocebus sabaeus GN=PSMA7 PE=3 SV=1;sp|O14818|PSA7_HUMAN Proteasome subunit alpha type-7 OS=Homo sapiens GN=PSMA7 PE=1 SV=1;sp|O14818-2|PSA7_HUMAN Isoform 2 of Proteasome subunit alpha type
1393	A0A0D9RD34;Q9UJZ1;A0A087WYB4;Q9UJZ1-2	STOML2	Stomatin-like protein 2, mitochondrial	14	14	63.8	38.588	356	218.48		-1.66541	-1.19676	-0.468652		3.61075	2.42534	1.09638	+					9	12	12	11	11	13	3	3	3	4548900000		26.0991	26.4153	26.2341	27.9582	28.0599	27.7267	27.5678	27.6701	27.101		tr|A0A0D9RD34|A0A0D9RD34_CHLSB Uncharacterized protein OS=Chlorocebus sabaeus GN=STOML2 PE=4 SV=1;sp|Q9UJZ1|STML2_HUMAN Stomatin-like protein 2, mitochondrial OS=Homo sapiens GN=STOML2 PE=1 SV=1;tr|A0A087WYB4|A0A087WYB4_HUMAN Stomatin-like protein 2, mitoc
2994	A0A0D9S3T6;P62280;M0QZC5;A0A0D9S9S6;A0A0D9RW83	RPS11	40S ribosomal protein S11	11	11	56.3	18.431	158	77.079		0.28512	-0.373441	0.658561		1.4599	0.204229	0.391128						9	7	7	7	5	6	5	7	7	4538400000		27.3852	27.3422	27.2722	27.2029	26.9122	27.0291	26.8737	27.1372	29.1089		tr|A0A0D9S3T6|A0A0D9S3T6_CHLSB Uncharacterized protein OS=Chlorocebus sabaeus GN=RPS11 PE=3 SV=1;sp|P62280|RS11_HUMAN 40S ribosomal protein S11 OS=Homo sapiens GN=RPS11 PE=1 SV=3;tr|M0QZC5|M0QZC5_HUMAN 40S ribosomal protein S11 OS=Homo sapiens GN=RPS11 PE=
4356	Q9Y5S2;H0YLY0	CDC42BPB	Serine/threonine-protein kinase MRCK beta	79	11	49.9	194.31	1711	323.31	1690	-2.96007	-4.46878	1.5087		1.2505	2.07176	0.9858	+	+	+_+			11	11	11	7	8	10	2	0	0	4513900000		NaN	NaN	25.4913	28.0098	26.1032	25.9205	27.705	28.2503	28.6043		sp|Q9Y5S2|MRCKB_HUMAN Serine/threonine-protein kinase MRCK beta OS=Homo sapiens GN=CDC42BPB PE=1 SV=2;tr|H0YLY0|H0YLY0_HUMAN Serine/threonine-protein kinase MRCK beta (Fragment) OS=Homo sapiens GN=CDC42BPB PE=1 SV=8
1392	A0A0D9RD33;P84103-2;P84103;A0A087X2D0	SRSF3	Serine/arginine-rich splicing factor 3	10	9	54.3	19.308	164	202.94		0.167999	-2.64202	2.81001		0.0857641	0.433654	0.449142						9	4	2	2	2	5	1	1	1	4502800000		NaN	NaN	NaN	23.878	21.7261	21.9691	21.9207	23.6333	30.4492		tr|A0A0D9RD33|A0A0D9RD33_CHLSB Uncharacterized protein OS=Chlorocebus sabaeus GN=SRSF3 PE=4 SV=1;sp|P84103-2|SRSF3_HUMAN Isoform 2 of Serine/arginine-rich splicing factor 3 OS=Homo sapiens GN=SRSF3;sp|P84103|SRSF3_HUMAN Serine/arginine-rich splicing factor
2678	A0A0D9RYD9;A0A0D9RYD7;J3QRS3;P19105;O14950;A0A0D9RCB0;P24844;J3KTJ1	MYL12A;MYL12B;MYL9	Myosin regulatory light chain 12A;Myosin regulatory light chain 12B;Myosin regulatory light polypeptide 9	14	14	55	19.764	171	210.38		-4.68429	-4.67309	-0.0111949		2.82795	2.85548	0.00809001	+	+	+_+			14	13	13	13	13	12	1	2	0	4496200000		24.0167	NaN	NaN	27.8671	28.1651	27.0538	27.8082	28.1498	27.0946		tr|A0A0D9RYD9|A0A0D9RYD9_CHLSB Uncharacterized protein OS=Chlorocebus sabaeus GN=MYL12A PE=4 SV=1;tr|A0A0D9RYD7|A0A0D9RYD7_CHLSB Uncharacterized protein OS=Chlorocebus sabaeus GN=MYL12B PE=4 SV=1;tr|J3QRS3|J3QRS3_HUMAN Myosin regulatory light chain 12A OS=
2815	A0A0D9S0P9;Q15029-2;Q15029;Q15029-3	EFTUD2	116 kDa U5 small nuclear ribonucleoprotein component	35	34	51.6	109.45	972	323.31		-3.37657	-4.61622	1.23965		2.87137	1.73053	0.466171	+	+	+_+			33	19	18	15	18	18	2	2	2	4435500000		23.3851	23.4003	NaN	26.1561	26.2868	26.6875	26.3027	26.6613	29.8853		tr|A0A0D9S0P9|A0A0D9S0P9_CHLSB Uncharacterized protein OS=Chlorocebus sabaeus GN=EFTUD2 PE=4 SV=1;sp|Q15029-2|U5S1_HUMAN Isoform 2 of 116 kDa U5 small nuclear ribonucleoprotein component OS=Homo sapiens GN=EFTUD2;sp|Q15029|U5S1_HUMAN 116 kDa U5 small nucle
1612	A0A0D9RGI6	CLTCL1	Clathrin heavy chain	25	12	14.4	217.21	1914	29.298		-1.63151	-1.56181	-0.0697072		1.34099	0.992334	0.0504843						9	8	9	9	7	8	3	4	4	4406400000		25.3162	25.5108	27.107	27.5295	27.6139	27.6852	28.1223	27.8922	26.605		tr|A0A0D9RGI6|A0A0D9RGI6_CHLSB Clathrin heavy chain OS=Chlorocebus sabaeus GN=CLTCL1 PE=3 SV=1
3659	Q5QPK2;H0Y368;O60762;A0A0D9RRS5;Q5QPJ9	DPM1	Dolichol-phosphate mannosyltransferase subunit 1	12	12	46	32.426	287	90.289		-0.722485	-0.992858	0.270374		1.4886	1.65347	0.626715						10	12	11	10	10	11	8	5	7	4397800000		26.674	27.0812	26.3575	27.4328	27.5649	27.2824	27.8454	27.8998	27.3461		tr|Q5QPK2|Q5QPK2_HUMAN Dolichol-phosphate mannosyltransferase subunit 1 OS=Homo sapiens GN=DPM1 PE=1 SV=1;tr|H0Y368|H0Y368_HUMAN Dolichol-phosphate mannosyltransferase subunit 1 (Fragment) OS=Homo sapiens GN=DPM1 PE=1 SV=1;sp|O60762|DPM1_HUMAN Dolichol-pho
2448	A0A0D9RUF1;P31153;P31153-2	MAT2A	S-adenosylmethionine synthase isoform type-2	12	12	30.6	43.66	395	146.8		1.71353	1.57446	0.139068		4.25705	3.3467	0.329731	+	+	+_+			8	6	7	8	6	8	11	11	11	4397700000		28.9018	28.8606	28.9367	27.0658	27.1251	27.3676	27.4963	27.4469	27.0326		tr|A0A0D9RUF1|A0A0D9RUF1_CHLSB S-adenosylmethionine synthase OS=Chlorocebus sabaeus GN=MAT2A PE=3 SV=1;sp|P31153|METK2_HUMAN S-adenosylmethionine synthase isoform type-2 OS=Homo sapiens GN=MAT2A PE=1 SV=1;sp|P31153-2|METK2_HUMAN Isoform 2 of S-adenosylmeth
686	A0A0D9R2D4;Q9UH99;Q9UH99-2;Q9UH99-3	SUN2	SUN domain-containing protein 2	21	21	40.7	80.463	720	193.45	54	-4.41851	-4.81883	0.400323		4.54455	4.34676	0.670613	+	+	+_+			19	18	19	14	11	17	0	0	0	4386800000		NaN	NaN	NaN	27.3926	27.8677	27.3752	28.3797	27.752	27.7047		tr|A0A0D9R2D4|A0A0D9R2D4_CHLSB Uncharacterized protein OS=Chlorocebus sabaeus GN=SUN2 PE=4 SV=1;sp|Q9UH99|SUN2_HUMAN SUN domain-containing protein 2 OS=Homo sapiens GN=SUN2 PE=1 SV=3;sp|Q9UH99-2|SUN2_HUMAN Isoform 2 of SUN domain-containing protein 2 OS=Ho
1939	A0A0D9RLG6;P61106;X6RFL8	RAB14	Ras-related protein Rab-14	16	15	69.3	23.897	215	144.05		-1.13759	-0.969991	-0.167599		1.91264	1.63109	0.323904						10	11	10	11	12	13	7	6	8	4324400000		26.3582	26.2765	26.9753	27.8845	27.7327	27.4056	27.406	27.8176	27.2963		tr|A0A0D9RLG6|A0A0D9RLG6_CHLSB Uncharacterized protein OS=Chlorocebus sabaeus GN=RAB14 PE=4 SV=1;sp|P61106|RAB14_HUMAN Ras-related protein Rab-14 OS=Homo sapiens GN=RAB14 PE=1 SV=4;tr|X6RFL8|X6RFL8_HUMAN Ras-related protein Rab-14 (Fragment) OS=Homo sapien
2782	A0A0D9RZZ9;P49257	LMAN1	Protein ERGIC-53	16	16	36.7	57.39	510	166.08		-0.978341	-0.741074	-0.237267		0.705959	0.530642	0.264878						13	15	14	12	11	16	8	5	7	4308200000		25.7702	26.6992	27.7445	28.1644	27.7641	27.2205	27.2377	27.2595	27.9399		tr|A0A0D9RZZ9|A0A0D9RZZ9_CHLSB Uncharacterized protein OS=Chlorocebus sabaeus GN=LMAN1 PE=4 SV=1;sp|P49257|LMAN1_HUMAN Protein ERGIC-53 OS=Homo sapiens GN=LMAN1 PE=1 SV=2
3995	P63208;E5RJR5;A0A0D9RMF4;E7ERH2;F8W8N3;P63208-2	SKP1	S-phase kinase-associated protein 1	11	10	76.7	18.658	163	142.67		1.32032	0.979663	0.340655		1.64705	1.46688	0.377684						8	9	9	8	9	8	5	6	7	4301300000		28.7048	28.6511	28.0562	27.747	26.7846	26.9196	27.6188	27.0448	27.8096		sp|P63208|SKP1_HUMAN S-phase kinase-associated protein 1 OS=Homo sapiens GN=SKP1 PE=1 SV=2;tr|E5RJR5|E5RJR5_HUMAN S-phase kinase-associated protein 1 OS=Homo sapiens GN=SKP1 PE=1 SV=1;tr|A0A0D9RMF4|A0A0D9RMF4_CHLSB Uncharacterized protein OS=Chlorocebus sa
3989	P62841;K7EQJ5;K7EJ78;K7ELC2;A0A0D9RI58;K7EM56;A0A0B4J2B4;S4R417	RPS15	40S ribosomal protein S15	6	6	56.6	17.04	145	48.302		0.132877	-0.341984	0.474862		0.123801	0.226032	0.409081						5	4	5	4	6	4	4	4	3	4292600000		28.3007	27.2843	27.1596	27.1615	27.6843	27.5001	27.4026	27.5095	28.8585		sp|P62841|RS15_HUMAN 40S ribosomal protein S15 OS=Homo sapiens GN=RPS15 PE=1 SV=2;tr|K7EQJ5|K7EQJ5_HUMAN 40S ribosomal protein S15 OS=Homo sapiens GN=RPS15 PE=1 SV=2;tr|K7EJ78|K7EJ78_HUMAN 40S ribosomal protein S15 OS=Homo sapiens GN=RPS15 PE=1 SV=2;tr|K7E
3053	A0A0D9S4V3;O15427;J3QQS9;J3QQV2;J3QSC3	SLC16A3	Monocarboxylate transporter 4	4	4	8.8	49.514	465	8.8592		-3.49651	-3.13103	-0.365479		1.76478	1.48185	0.321298	+	+	+_+			4	4	4	4	4	4	2	2	0	4292100000		24.8825	NaN	25.5608	28.0508	28.0016	27.5402	27.7228	28.1189	26.6546		tr|A0A0D9S4V3|A0A0D9S4V3_CHLSB Uncharacterized protein OS=Chlorocebus sabaeus GN=SLC16A3 PE=4 SV=1;sp|O15427|MOT4_HUMAN Monocarboxylate transporter 4 OS=Homo sapiens GN=SLC16A3 PE=1 SV=1;tr|J3QQS9|J3QQS9_HUMAN Monocarboxylate transporter 4 (Fragment) OS=Ho
674	J3QLE5;A0A0D9REM0;A0A0D9R260;P14678-2;P63162;P14678;P63162-2;P14678-3;J3KRY3;S4R3P3	SNRPN;SNRPB	Small nuclear ribonucleoprotein-associated proteins B and B;Small nuclear ribonucleoprotein-associated protein N	8	8	35.5	17.546	169	23.2		-2.23826	-2.95992	0.721656		3.21863	2.14116	0.511084	+	+	+_+			8	5	6	7	7	6	3	4	2	4286800000		24.8717	24.7082	24.9814	27.5008	26.9965	26.7788	27.096	27.382	28.9631		tr|J3QLE5|J3QLE5_HUMAN Small nuclear ribonucleoprotein-associated protein N (Fragment) OS=Homo sapiens GN=SNRPN PE=1 SV=1;tr|A0A0D9REM0|A0A0D9REM0_CHLSB Small nuclear ribonucleoprotein-associated protein OS=Chlorocebus sabaeus GN=SNRPB PE=3 SV=1;tr|A0A0D9R
3956	P54709;A0A0D9RFQ9;C9JA36;P54709-2	ATP1B3	Sodium/potassium-transporting ATPase subunit beta-3	11	11	38.4	31.512	279	31.144		-1.59643	-1.33401	-0.262419		2.32852	1.9939	1.13532	+					10	10	9	9	9	10	5	3	4	4261900000		25.6371	26.1632	26.5883	27.83	27.6961	27.6519	27.5712	27.5446	27.275		sp|P54709|AT1B3_HUMAN Sodium/potassium-transporting ATPase subunit beta-3 OS=Homo sapiens GN=ATP1B3 PE=1 SV=1;tr|A0A0D9RFQ9|A0A0D9RFQ9_CHLSB Sodium/potassium-transporting ATPase subunit beta OS=Chlorocebus sabaeus GN=ATP1B3 PE=3 SV=1;tr|C9JA36|C9JA36_HUMAN
2062	A0A0D9RNF7;P21291;E9PS42;E9PND2;E9PP21	CSRP1	Cysteine and glycine-rich protein 1	10	10	64.2	20.583	193	300.64		2.10844	1.51045	0.597997		2.17119	1.92672	1.10689	+					7	8	8	5	5	6	7	7	8	4229900000		28.7639	28.5723	29.6531	27.2066	27.0353	26.4221	27.4773	27.3372	27.6434		tr|A0A0D9RNF7|A0A0D9RNF7_CHLSB Uncharacterized protein OS=Chlorocebus sabaeus GN=CSRP1 PE=4 SV=1;sp|P21291|CSRP1_HUMAN Cysteine and glycine-rich protein 1 OS=Homo sapiens GN=CSRP1 PE=1 SV=3;tr|E9PS42|E9PS42_HUMAN Cysteine and glycine-rich protein 1 OS=Homo
1126	A0A0D9R8P2;Q9BVK6	TMED9	Transmembrane emp24 domain-containing protein 9	9	7	36.6	27.307	235	51.783		-2.02343	-1.18042	-0.843012		2.24308	1.3374	1.1892	+					3	5	5	6	7	5	2	2	3	4215100000		25.4504	25.8941	26.54	27.5962	28.0867	28.2719	27.2674	27.5257	26.6326		tr|A0A0D9R8P2|A0A0D9R8P2_CHLSB Uncharacterized protein OS=Chlorocebus sabaeus GN=TMED9 PE=3 SV=1;sp|Q9BVK6|TMED9_HUMAN Transmembrane emp24 domain-containing protein 9 OS=Homo sapiens GN=TMED9 PE=1 SV=2
2879	A0A0D9S1Y2;Q9BTE7;H0YCN4;E9PM04	DCUN1D5	DCN1-like protein 5;DCN1-like protein	13	12	51.5	27.508	237	47.478		-5.21851	-4.79527	-0.423246		4.67959	4.33741	0.686537	+	+	+_+			10	10	11	10	11	11	0	1	0	4208100000		NaN	NaN	NaN	28.2504	27.7091	27.7053	27.5393	27.7933	27.0625		tr|A0A0D9S1Y2|A0A0D9S1Y2_CHLSB DCN1-like protein OS=Chlorocebus sabaeus GN=DCUN1D5 PE=4 SV=1;sp|Q9BTE7|DCNL5_HUMAN DCN1-like protein 5 OS=Homo sapiens GN=DCUN1D5 PE=1 SV=1;tr|H0YCN4|H0YCN4_HUMAN DCN1-like protein (Fragment) OS=Homo sapiens GN=DCUN1D5 PE=1
2060	A0A0D9RNF1;Q9H7Z7;A6NHH0	PTGES2	Prostaglandin E synthase 2;Prostaglandin E synthase 2 truncated form	15	15	46.2	41.976	377	82.201		-4.44732	-4.05187	-0.395451		2.765	2.58062	0.414608	+	+	+_+			12	13	10	12	14	12	2	2	2	4136200000		NaN	NaN	24.3987	27.793	27.4293	28.3703	27.3511	28.0358	27.0192		tr|A0A0D9RNF1|A0A0D9RNF1_CHLSB Uncharacterized protein OS=Chlorocebus sabaeus GN=PTGES2 PE=4 SV=1;sp|Q9H7Z7|PGES2_HUMAN Prostaglandin E synthase 2 OS=Homo sapiens GN=PTGES2 PE=1 SV=1;tr|A6NHH0|A6NHH0_HUMAN Prostaglandin E synthase 2 OS=Homo sapiens GN=PTGE
2121	A0A0D9RPD6;P20674;H3BNX8;H3BRM5;H3BV69	COX5A	Cytochrome c oxidase subunit 5A, mitochondrial	7	7	52.7	16.685	150	53.522		-1.81451	-1.70086	-0.113651		1.41505	1.48412	0.0727652						6	6	6	6	5	7	3	2	3	4127500000		25.0089	25.8164	26.4299	28.3877	26.9193	27.3917	27.0414	27.1988	28.1176		tr|A0A0D9RPD6|A0A0D9RPD6_CHLSB Uncharacterized protein OS=Chlorocebus sabaeus GN=COX5A PE=4 SV=1;sp|P20674|COX5A_HUMAN Cytochrome c oxidase subunit 5A, mitochondrial OS=Homo sapiens GN=COX5A PE=1 SV=2;tr|H3BNX8|H3BNX8_HUMAN Cytochrome c oxidase subunit 5A,
3121	A0A0D9S5Z2;Q9NZL4;Q9NZL4-3;Q9NZL4-2	HSPBP1	Hsp70-binding protein 1	17	17	54.5	39.561	363	83.703		-3.20617	-2.61802	-0.588145		4.04785	3.48936	1.17723	+	+	+_+			12	15	16	14	14	16	2	1	1	4111700000		24.4456	24.8152	24.8808	28.1324	27.6354	27.9923	27.0661	27.6813	27.2483		tr|A0A0D9S5Z2|A0A0D9S5Z2_CHLSB Uncharacterized protein OS=Chlorocebus sabaeus GN=HSPBP1 PE=4 SV=1;sp|Q9NZL4|HPBP1_HUMAN Hsp70-binding protein 1 OS=Homo sapiens GN=HSPBP1 PE=1 SV=1;sp|Q9NZL4-3|HPBP1_HUMAN Isoform 3 of Hsp70-binding protein 1 OS=Homo sapiens
1919	A0A0D9RL68;Q96DA6;Q96DA6-2	DNAJC19	Mitochondrial import inner membrane translocase subunit TIM14	10	10	66.4	12.498	116	38.36		-5.02715	-4.49757	-0.529579		5.11063	3.96044	0.74809	+	+	+_+			8	8	7	9	10	8	0	0	0	4104000000		NaN	NaN	NaN	27.5134	27.9886	27.9542	27.285	27.788	26.7945		tr|A0A0D9RL68|A0A0D9RL68_CHLSB Uncharacterized protein OS=Chlorocebus sabaeus GN=DNAJC19 PE=4 SV=1;sp|Q96DA6|TIM14_HUMAN Mitochondrial import inner membrane translocase subunit TIM14 OS=Homo sapiens GN=DNAJC19 PE=1 SV=3;sp|Q96DA6-2|TIM14_HUMAN Isoform 2 of
878	C9J3L8;C9J5W0;E9PAL7;C9IZQ1;A0A0D9R4W1;P43307;P43307-2	SSR1	Translocon-associated protein subunit alpha	3	3	12.8	29.573	265	25.179		-5.32057	-5.23181	-0.0887693		3.71709	3.2334	0.0745365	+	+	+_+			2	3	3	2	3	3	1	1	1	4099900000		NaN	NaN	NaN	27.7513	27.9151	27.3388	28.023	27.8957	26.8202		tr|C9J3L8|C9J3L8_HUMAN Translocon-associated protein subunit alpha OS=Homo sapiens GN=SSR1 PE=1 SV=1;tr|C9J5W0|C9J5W0_HUMAN Translocon-associated protein subunit alpha OS=Homo sapiens GN=SSR1 PE=1 SV=1;tr|E9PAL7|E9PAL7_HUMAN Translocon-associated protein s
2181	A0A0D9RQC5;Q9UI12-2;Q9UI12;G3V126	ATP6V1H	V-type proton ATPase subunit H	16	16	40.6	55.962	483	131.66		-3.39801	-2.93492	-0.463095		1.06898	0.913406	1.16737	+					13	11	13	15	15	12	2	1	1	4089600000		NaN	NaN	27.4188	27.7254	28.0365	27.8504	27.5376	27.602	27.0834		tr|A0A0D9RQC5|A0A0D9RQC5_CHLSB Uncharacterized protein OS=Chlorocebus sabaeus GN=ATP6V1H PE=4 SV=1;sp|Q9UI12-2|VATH_HUMAN Isoform 2 of V-type proton ATPase subunit H OS=Homo sapiens GN=ATP6V1H;sp|Q9UI12|VATH_HUMAN V-type proton ATPase subunit H OS=Homo sap
2460	A0A0D9RUK7;Q14739;C9JXK0	LBR	Lamin-B receptor	12	12	15.8	71.318	622	43.457		-5.05359	-4.53403	-0.519564		2.19844	2.28943	0.346412	+	+	+_+			7	10	11	12	12	10	1	2	1	4087800000		23.8385	NaN	NaN	26.706	28.3321	28.49	27.6488	27.4842	26.8363		tr|A0A0D9RUK7|A0A0D9RUK7_CHLSB Uncharacterized protein OS=Chlorocebus sabaeus GN=LBR PE=4 SV=1;sp|Q14739|LBR_HUMAN Lamin-B receptor OS=Homo sapiens GN=LBR PE=1 SV=2;tr|C9JXK0|C9JXK0_HUMAN Lamin-B receptor (Fragment) OS=Homo sapiens GN=LBR PE=1 SV=1
3596	E7END7;P62820;P62820-2;A0A0D9RQK3;P62820-3	RAB1A	Ras-related protein Rab-1A	14	8	72.3	19.018	173	291.11		-0.948217	-0.331193	-0.617024		1.65457	0.540995	0.958046						8	8	6	8	8	8	2	2	2	4087400000		26.4695	26.7689	27.0186	27.9948	27.3002	27.8067	27.1388	27.4319	26.6799		tr|E7END7|E7END7_HUMAN Ras-related protein Rab-1A OS=Homo sapiens GN=RAB1A PE=1 SV=1;sp|P62820|RAB1A_HUMAN Ras-related protein Rab-1A OS=Homo sapiens GN=RAB1A PE=1 SV=3;sp|P62820-2|RAB1A_HUMAN Isoform 2 of Ras-related protein Rab-1A OS=Homo sapiens GN=RAB1
1103	A0A0D9R8E8;P51149;C9J8S3;C9J592;C9IZZ0;C9J4V0;C9J4S4	RAB7A	Ras-related protein Rab-7a	12	12	67.6	23.489	207	118.15		-1.50397	-0.944403	-0.559563		2.64913	2.04182	0.943733	+					10	10	11	10	9	10	4	4	3	4069500000		26.3576	26.1654	26.3861	28.1486	27.4406	27.8319	26.8742	27.4109	27.4572		tr|A0A0D9R8E8|A0A0D9R8E8_CHLSB Uncharacterized protein OS=Chlorocebus sabaeus GN=RAB7A PE=4 SV=1;sp|P51149|RAB7A_HUMAN Ras-related protein Rab-7a OS=Homo sapiens GN=RAB7A PE=1 SV=1;tr|C9J8S3|C9J8S3_HUMAN Ras-related protein Rab-7a OS=Homo sapiens GN=RAB7A
1371	A0A0D9RCR5;P54136;P54136-2	RARS	Arginine--tRNA ligase, cytoplasmic	27	27	47.4	75.345	660	52.163		0.0496941	0.091238	-0.041544		0.168377	1.10205	0.144591						16	26	20	23	22	24	9	13	10	4052800000		27.5156	27.4245	27.3977	27.4538	27.5433	27.1916	27.3813	27.3272	27.3556		tr|A0A0D9RCR5|A0A0D9RCR5_CHLSB Uncharacterized protein OS=Chlorocebus sabaeus GN=RARS PE=3 SV=1;sp|P54136|SYRC_HUMAN Arginine--tRNA ligase, cytoplasmic OS=Homo sapiens GN=RARS PE=1 SV=2;sp|P54136-2|SYRC_HUMAN Isoform Monomeric of Arginine--tRNA ligase, cyt
669	A0A0D9R246;Q16531;F5GY55	DDB1	DNA damage-binding protein 1	30	30	33.7	126.97	1140	127.21		-1.63753	-1.78724	0.149714		2.3479	2.84914	0.154818	+	+	+_+			23	24	27	24	25	27	8	6	7	4034200000		25.7449	25.8152	25.8368	28.0017	27.1605	27.1473	27.3228	27.4005	28.0353		tr|A0A0D9R246|A0A0D9R246_CHLSB Uncharacterized protein OS=Chlorocebus sabaeus GN=DDB1 PE=4 SV=1;sp|Q16531|DDB1_HUMAN DNA damage-binding protein 1 OS=Homo sapiens GN=DDB1 PE=1 SV=1;tr|F5GY55|F5GY55_HUMAN DNA damage-binding protein 1 OS=Homo sapiens GN=DDB1
3138	Q5JR08;A0A0D9S6D4;P08134;E9PQH6;Q5JR07;Q5JR05;U3KQA9;U3KQV3	RHOC	Rho-related GTP-binding protein RhoC	12	4	78.2	21.523	188	14.729		-2.64101	-2.32377	-0.317239		0.895101	0.771825	0.419279						4	4	4	4	4	4	2	3	2	4025000000		26.047	NaN	26.6179	27.2383	27.7938	27.8314	27.6305	27.4891	26.792		tr|Q5JR08|Q5JR08_HUMAN Rho-related GTP-binding protein RhoC (Fragment) OS=Homo sapiens GN=RHOC PE=1 SV=8;tr|A0A0D9S6D4|A0A0D9S6D4_CHLSB Uncharacterized protein OS=Chlorocebus sabaeus GN=RHOC PE=4 SV=1;sp|P08134|RHOC_HUMAN Rho-related GTP-binding protein Rh
3344	A0A0D9S9X9;Q9UH62	ARMCX3	Armadillo repeat-containing X-linked protein 3	16	16	58	42.546	379	124.44		-5.53369	-5.48317	-0.0505161		3.88375	3.91964	0.193887	+	+	+_+			12	13	14	13	13	13	1	1	1	4022000000		NaN	NaN	NaN	27.8777	27.7252	27.545	27.6191	27.7138	27.6636		tr|A0A0D9S9X9|A0A0D9S9X9_CHLSB Uncharacterized protein OS=Chlorocebus sabaeus GN=ARMCX3 PE=4 SV=1;sp|Q9UH62|ARMX3_HUMAN Armadillo repeat-containing X-linked protein 3 OS=Homo sapiens GN=ARMCX3 PE=1 SV=1
1745	A0A0D9RIQ1;Q7Z7G8-2;Q7Z7G8-6;Q7Z7G8	VPS13B	Vacuolar protein sorting-associated protein 13B	10	10	3.4	445.96	3997	9.6867		-4.74566	-3.548	-1.19766		4.05079	3.71493	1.97776	+	+	+_+			6	8	7	7	8	7	1	0	1	4017200000		NaN	NaN	NaN	27.2044	27.8437	27.7982	26.2255	26.7466	26.2812		tr|A0A0D9RIQ1|A0A0D9RIQ1_CHLSB Uncharacterized protein OS=Chlorocebus sabaeus GN=VPS13B PE=4 SV=1;sp|Q7Z7G8-2|VP13B_HUMAN Isoform 2 of Vacuolar protein sorting-associated protein 13B OS=Homo sapiens GN=VPS13B;sp|Q7Z7G8-6|VP13B_HUMAN Isoform 6 of Vacuolar p
1510	A0A0D9RF02;A0A087WZN1;O43837;A0A087X2E5;O43837-2	IDH3B	Isocitrate dehydrogenase [NAD] subunit, mitochondrial;Isocitrate dehydrogenase [NAD] subunit beta, mitochondrial	17	17	49.1	42.254	385	98.407		1.34844	1.40875	-0.0603085		4.51702	3.25074	0.171781	+	+	+_+			10	11	11	13	10	12	13	13	12	4014400000		28.4828	28.664	28.6351	27.2724	27.2806	27.1836	27.0684	27.4431	27.0442		tr|A0A0D9RF02|A0A0D9RF02_CHLSB Isocitrate dehydrogenase [NAD] subunit, mitochondrial OS=Chlorocebus sabaeus GN=IDH3B PE=3 SV=1;tr|A0A087WZN1|A0A087WZN1_HUMAN Isocitrate dehydrogenase [NAD] subunit, mitochondrial OS=Homo sapiens GN=IDH3B PE=1 SV=1;sp|O43837
981	A0A0D9R6G9;A0A0D9S9Q1;P04080	CSTB	Cystatin-B	6	6	59.2	11.131	98	312.73		2.38063	2.19107	0.18956		4.34755	3.5751	0.431461	+	+	+_+			4	6	5	6	6	4	6	6	6	4013000000		29.0636	29.3074	29.3036	26.8852	26.9855	26.6619	27.3281	27.0033	26.77		tr|A0A0D9R6G9|A0A0D9R6G9_CHLSB Uncharacterized protein OS=Chlorocebus sabaeus PE=4 SV=1;tr|A0A0D9S9Q1|A0A0D9S9Q1_CHLSB Uncharacterized protein OS=Chlorocebus sabaeus PE=4 SV=1;sp|P04080|CYTB_HUMAN Cystatin-B OS=Homo sapiens GN=CSTB PE=1 SV=2
193	A0A0D9QUV1;P43686;P43686-2	PSMC4	26S protease regulatory subunit 6B	19	19	66.5	47.366	418	137.9		-0.50875	-0.301869	-0.206881		0.728617	0.445883	0.230284						17	17	13	15	13	18	6	6	7	4002100000		27.2026	26.7995	26.5995	26.8686	27.4907	27.7685	27.5518	27.2009	26.7544		tr|A0A0D9QUV1|A0A0D9QUV1_CHLSB Uncharacterized protein OS=Chlorocebus sabaeus GN=PSMC4 PE=3 SV=1;sp|P43686|PRS6B_HUMAN 26S protease regulatory subunit 6B OS=Homo sapiens GN=PSMC4 PE=1 SV=2;sp|P43686-2|PRS6B_HUMAN Isoform 2 of 26S protease regulatory subuni
2949	A0A0D9S338;Q9Y230;Q9Y230-2;M0R0Y3	RUVBL2	RuvB-like 2	23	23	51.4	51.156	463	51.775		-2.06383	-2.17145	0.107623		1.89505	2.10927	0.154845	+	+	+_+			20	17	17	17	19	19	2	5	5	3998500000		25.7182	26.0299	24.6368	27.2005	27.971	27.4048	27.4583	27.5774	27.8635		tr|A0A0D9S338|A0A0D9S338_CHLSB RuvB-like helicase OS=Chlorocebus sabaeus GN=RUVBL2 PE=3 SV=1;sp|Q9Y230|RUVB2_HUMAN RuvB-like 2 OS=Homo sapiens GN=RUVBL2 PE=1 SV=3;sp|Q9Y230-2|RUVB2_HUMAN Isoform 2 of RuvB-like 2 OS=Homo sapiens GN=RUVBL2;tr|M0R0Y3|M0R0Y3_H
3985	P62269	RPS18	40S ribosomal protein S18	11	11	53.3	17.718	152	25.442		0.288636	-0.587744	0.87638		0.354428	0.373095	0.668365						9	7	9	7	8	8	7	10	9	3976600000		27.3528	27.4865	26.4859	27.0724	26.7294	26.6576	26.9308	27.3221	28.8356		sp|P62269|RS18_HUMAN 40S ribosomal protein S18 OS=Homo sapiens GN=RPS18 PE=1 SV=3
1445	A0A0D9RDT9;P05387	RPLP2	60S acidic ribosomal protein P2	6	6	77.4	11.665	115	145.03		0.181307	-0.355548	0.536854		0.19378	0.257802	0.537975						5	4	4	4	4	4	3	5	4	3962000000		27.9	27.2413	26.7123	27.0871	27.291	26.9316	27.1828	27.2423	28.4951		tr|A0A0D9RDT9|A0A0D9RDT9_CHLSB Uncharacterized protein OS=Chlorocebus sabaeus GN=RPLP2 PE=3 SV=1;sp|P05387|RLA2_HUMAN 60S acidic ribosomal protein P2 OS=Homo sapiens GN=RPLP2 PE=1 SV=1
2999	A0A0D9S3W2;P37802;X6RJP6;P37802-2	TAGLN2	Transgelin-2	15	15	79.9	22.391	199	114.2		1.8777	1.67888	0.198823		3.75011	2.82458	0.405059	+	+	+_+			11	8	9	7	6	9	14	14	14	3943400000		28.7776	28.7547	29.0889	27.1711	26.9366	26.8803	27.4332	26.8236	27.3278		tr|A0A0D9S3W2|A0A0D9S3W2_CHLSB Transgelin OS=Chlorocebus sabaeus GN=TAGLN2 PE=3 SV=1;sp|P37802|TAGL2_HUMAN Transgelin-2 OS=Homo sapiens GN=TAGLN2 PE=1 SV=3;tr|X6RJP6|X6RJP6_HUMAN Transgelin-2 (Fragment) OS=Homo sapiens GN=TAGLN2 PE=1 SV=1;sp|P37802-2|TAGL2
830	A0A0D9R4C9;Q99470	SDF2	Stromal cell-derived factor 2	7	7	36	23.113	211	122.65		2.3491	1.60325	0.745845		2.48788	1.26498	0.613137	+					4	4	4	4	5	5	5	5	6	3930000000		28.9747	28.3266	29.3999	26.4525	26.9445	26.257	28.2996	26.6724	26.9196		tr|A0A0D9R4C9|A0A0D9R4C9_CHLSB Uncharacterized protein OS=Chlorocebus sabaeus GN=SDF2 PE=4 SV=1;sp|Q99470|SDF2_HUMAN Stromal cell-derived factor 2 OS=Homo sapiens GN=SDF2 PE=1 SV=2
3933	P46940;A0A0J9YXZ5	IQGAP1	Ras GTPase-activating-like protein IQGAP1	142	1	72.6	189.25	1657	207.93		-5.71187	-4.93534	-0.776532		4.09861	3.68689	0.717977	+	+	+_+			1	1	1	1	1	1	0	0	0	3928600000		NaN	NaN	NaN	27.1833	28.1721	28.182	27.7575	26.9469	26.5034		sp|P46940|IQGA1_HUMAN Ras GTPase-activating-like protein IQGAP1 OS=Homo sapiens GN=IQGAP1 PE=1 SV=1;tr|A0A0J9YXZ5|A0A0J9YXZ5_HUMAN Ras GTPase-activating-like protein IQGAP1 OS=Homo sapiens GN=IQGAP1 PE=1 SV=1
2809	A0A0D9S0H9;O00264;O00264-2	PGRMC1	Membrane-associated progesterone receptor component 1	10	9	60	21.699	195	235.31		-2.51165	-2.0581	-0.453548		4.33444	3.37312	1.47053	+	+	+_+			7	8	8	8	8	9	3	2	3	3928500000		25.0412	25.3516	25.4792	27.8218	27.8377	27.7476	27.205	27.212	27.6294		tr|A0A0D9S0H9|A0A0D9S0H9_CHLSB Uncharacterized protein OS=Chlorocebus sabaeus GN=PGRMC1 PE=3 SV=1;sp|O00264|PGRC1_HUMAN Membrane-associated progesterone receptor component 1 OS=Homo sapiens GN=PGRMC1 PE=1 SV=3;sp|O00264-2|PGRC1_HUMAN Isoform 2 of Membrane-
4284	Q9NQC3-2;Q9NQC3-5;Q9NQC3;Q9NQC3-4;F8W914;A0A0D9RNM3;H7C106;Q9NQC3-3;Q9NQC3-6	RTN4	Reticulon-4;Reticulon	7	6	36.2	40.317	373	245.29		-5.35481	-4.7008	-0.654002		5.46604	4.26298	1.38001	+	+	+_+			5	5	6	6	6	6	1	1	1	3921400000		NaN	NaN	NaN	27.9341	28.0059	27.8651	27.3897	27.5913	26.8621		sp|Q9NQC3-2|RTN4_HUMAN Isoform 2 of Reticulon-4 OS=Homo sapiens GN=RTN4;sp|Q9NQC3-5|RTN4_HUMAN Isoform 5 of Reticulon-4 OS=Homo sapiens GN=RTN4;sp|Q9NQC3|RTN4_HUMAN Reticulon-4 OS=Homo sapiens GN=RTN4 PE=1 SV=2;sp|Q9NQC3-4|RTN4_HUMAN Isoform 4 of Reticulon
653	A0A0D9R1V5	MYOF	Uncharacterized protein	76	9	44.7	232.11	2038	323.31		-1.186	-0.758343	-0.427659		2.05465	1.42341	2.71461						9	9	8	7	8	9	3	3	2	3915500000		26.1068	26.3824	26.9388	27.6868	27.578	27.7213	27.249	27.2956	27.1585		tr|A0A0D9R1V5|A0A0D9R1V5_CHLSB Uncharacterized protein OS=Chlorocebus sabaeus GN=MYOF PE=4 SV=1
147	A0A0B4J1Z1;C9JAB2;A0A0D9RIM7;Q16629-3;Q16629-2;Q16629-4;Q16629	SRSF7	Serine/arginine-rich splicing factor 7	11	10	64.2	15.763	137	55.871		1.4016	-1.70678	3.10838		0.620583	0.185976	0.390243						10	2	1	4	2	3	1	2	1	3907500000		19.8613	NaN	NaN	20.2633	20.6773	20.2698	NaN	20.2959	30.2225		tr|A0A0B4J1Z1|A0A0B4J1Z1_HUMAN Serine/arginine-rich-splicing factor 7 OS=Homo sapiens GN=SRSF7 PE=1 SV=1;tr|C9JAB2|C9JAB2_HUMAN Serine/arginine-rich-splicing factor 7 OS=Homo sapiens GN=SRSF7 PE=1 SV=1;tr|A0A0D9RIM7|A0A0D9RIM7_CHLSB Uncharacterized protein
667	A0A0D9R227;O00231;O00231-2	PSMD11	26S proteasome non-ATPase regulatory subunit 11	19	19	52.1	47.463	422	67.418		-3.09368	-2.84646	-0.247218		3.50155	3.02577	0.431976	+	+	+_+			12	18	18	19	18	18	4	5	5	3907100000		25.0077	24.645	24.172	27.9178	27.5422	27.6457	27.6696	27.6753	27.0191		tr|A0A0D9R227|A0A0D9R227_CHLSB Uncharacterized protein OS=Chlorocebus sabaeus GN=PSMD11 PE=4 SV=1;sp|O00231|PSD11_HUMAN 26S proteasome non-ATPase regulatory subunit 11 OS=Homo sapiens GN=PSMD11 PE=1 SV=3;sp|O00231-2|PSD11_HUMAN Isoform 2 of 26S proteasome
3370	A0A0D9SAS8	SUMO1	Small ubiquitin-related modifier 1	6	6	51.5	11.557	101	48.149	2	-4.77713	-4.60984	-0.16729		4.68227	4.65525	0.399219	+	+	+_+			6	6	4	5	6	5	0	0	0	3901500000		NaN	NaN	NaN	27.4618	27.9075	27.6811	27.4416	27.7546	27.3523		tr|A0A0D9SAS8|A0A0D9SAS8_CHLSB Small ubiquitin-related modifier OS=Chlorocebus sabaeus GN=SUMO1 PE=3 SV=1;tr|B8ZZN6|B8ZZN6_HUMAN Small ubiquitin-related modifier 1 OS=Homo sapiens GN=SUMO1 PE=1
3159	A0A0D9S6Q5;P48507;P48507-2	GCLM	Glutamate--cysteine ligase regulatory subunit	10	10	42.3	30.674	274	148.84		1.48209	1.35926	0.122829		2.98208	3.12834	0.313653	+	+	+_+			7	9	10	8	8	10	10	9	9	3895900000		28.5802	28.8545	28.4711	27.4032	26.9581	27.0982	27.4569	27.1626	27.2085		tr|A0A0D9S6Q5|A0A0D9S6Q5_CHLSB Uncharacterized protein OS=Chlorocebus sabaeus GN=GCLM PE=4 SV=1;sp|P48507|GSH0_HUMAN Glutamate--cysteine ligase regulatory subunit OS=Homo sapiens GN=GCLM PE=1 SV=1;sp|P48507-2|GSH0_HUMAN Isoform 2 of Glutamate--cysteine lig
607	C9JZR2;A0A0D9R121;O60716-5;O60716-3;O60716-2;O60716;O60716-21;O60716-19;O60716-18;O60716-17;O60716-13;O60716-11;O60716-10;O60716-8;O60716-9;O60716-7;O60716-6;O60716-4;O60716-24;O60716-23;O60716-22;O60716-20;O60716-16;O60716-15;O60716-14;O60716-12;O60716-29;O60716-27;O60716-26;O60716-25;O60716-32;O60716-31;O60716-30;O60716-28	CTNND1	Catenin delta-1	29	29	38.2	104.85	938	260.96		-0.828035	-1.22483	0.396791		1.86188	1.60359	0.476533						24	22	25	18	18	20	8	5	7	3877800000		26.1508	26.5766	26.42	27.427	27.2902	26.9143	27.2764	27.2838	28.2617		tr|C9JZR2|C9JZR2_HUMAN Catenin delta-1 OS=Homo sapiens GN=CTNND1 PE=1 SV=2;tr|A0A0D9R121|A0A0D9R121_CHLSB Uncharacterized protein OS=Chlorocebus sabaeus GN=CTNND1 PE=4 SV=1;sp|O60716-5|CTND1_HUMAN Isoform 1A of Catenin delta-1 OS=Homo sapiens GN=CTNND1;sp|
2635	A0A0D9RXR5;O75643	SNRNP200	U5 small nuclear ribonucleoprotein 200 kDa helicase	62	62	36.4	244.48	2136	323.31		-3.38984	-4.58608	1.19625		3.66433	1.63773	0.396271	+	+	+_+			61	24	18	24	23	27	2	2	1	3868700000		22.9577	NaN	22.2973	25.7862	26.0149	26.3969	25.9578	26.0403	29.7886		tr|A0A0D9RXR5|A0A0D9RXR5_CHLSB Uncharacterized protein OS=Chlorocebus sabaeus GN=SNRNP200 PE=4 SV=1;sp|O75643|U520_HUMAN U5 small nuclear ribonucleoprotein 200 kDa helicase OS=Homo sapiens GN=SNRNP200 PE=1 SV=2
882	A0A0D9R4X2;O00429-3;O00429;O00429-6;G8JLD5;O00429-4;O00429-5;O00429-2;O00429-8;O00429-7	DNM1L	Dynamin-1-like protein	25	25	48.5	83.398	749	305.93		-3.86369	-3.20497	-0.658715		3.25776	3.06318	1.23364	+	+	+_+			19	22	23	22	20	24	5	3	3	3862500000		23.5881	23.8618	24.676	28.2954	27.8091	27.6124	27.4173	27.3698	26.9537		tr|A0A0D9R4X2|A0A0D9R4X2_CHLSB Uncharacterized protein OS=Chlorocebus sabaeus GN=DNM1L PE=3 SV=1;sp|O00429-3|DNM1L_HUMAN Isoform 2 of Dynamin-1-like protein OS=Homo sapiens GN=DNM1L;sp|O00429|DNM1L_HUMAN Dynamin-1-like protein OS=Homo sapiens GN=DNM1L PE=1
80	A0A087WYT3;Q15185-4;Q15185;Q15185-3	PTGES3	Prostaglandin E synthase 3	7	7	40.9	19.155	164	116.52		1.13365	0.649001	0.484653		1.76532	1.24095	0.819222						6	6	7	3	4	7	4	4	4	3861600000		28.1648	27.8338	28.4754	27.4475	26.6991	26.9264	27.4061	27.2958	27.8251		tr|A0A087WYT3|A0A087WYT3_HUMAN Prostaglandin E synthase 3 OS=Homo sapiens GN=PTGES3 PE=1 SV=1;sp|Q15185-4|TEBP_HUMAN Isoform 4 of Prostaglandin E synthase 3 OS=Homo sapiens GN=PTGES3;sp|Q15185|TEBP_HUMAN Prostaglandin E synthase 3 OS=Homo sapiens GN=PTGES3
1771	A0A0D9RIZ6;P11717	IGF2R	Cation-independent mannose-6-phosphate receptor	34	34	17.1	274.39	2491	125.71	2484	-4.82411	-4.11903	-0.705077		2.91487	2.5967	1.37496	+	+	+_+			22	25	21	23	24	28	3	2	1	3860100000		23.8322	NaN	23.5293	27.6854	28.067	28.053	27.5284	26.8393	27.3225		tr|A0A0D9RIZ6|A0A0D9RIZ6_CHLSB Uncharacterized protein OS=Chlorocebus sabaeus GN=IGF2R PE=4 SV=1;sp|P11717|MPRI_HUMAN Cation-independent mannose-6-phosphate receptor OS=Homo sapiens GN=IGF2R PE=1 SV=3
2509	A0A0D9RVM1;O43143	DHX15	Pre-mRNA-splicing factor ATP-dependent RNA helicase DHX15	34	33	47.7	90.902	795	135.1		0.986108	0.154708	0.8314		2.89897	0.0680032	0.450788						29	11	14	12	11	15	11	10	10	3837700000		27.3568	27.6316	27.6029	26.3942	26.6882	26.5506	26.5505	26.6226	28.9541		tr|A0A0D9RVM1|A0A0D9RVM1_CHLSB Uncharacterized protein OS=Chlorocebus sabaeus GN=DHX15 PE=4 SV=1;sp|O43143|DHX15_HUMAN Pre-mRNA-splicing factor ATP-dependent RNA helicase DHX15 OS=Homo sapiens GN=DHX15 PE=1 SV=2
679	A0A0D9R286;Q15386	UBE3C	Ubiquitin-protein ligase E3C	23	23	25.7	123.95	1083	106.27		-3.38147	-2.89118	-0.490288		2.6174	3.3473	0.38566	+	+	+_+			18	21	18	21	21	18	3	2	2	3823300000		24.2746	24.5246	24.076	27.6968	26.8332	28.4897	27.0671	26.8373	27.6444		tr|A0A0D9R286|A0A0D9R286_CHLSB Uncharacterized protein OS=Chlorocebus sabaeus GN=UBE3C PE=4 SV=1;sp|Q15386|UBE3C_HUMAN Ubiquitin-protein ligase E3C OS=Homo sapiens GN=UBE3C PE=1 SV=3
2884	A0A0D9S208;P13073	COX4I1	Cytochrome c oxidase subunit 4 isoform 1, mitochondrial	9	9	52.1	19.562	169	50.789		-0.441363	0.00920804	-0.450571		0.946584	0.0108565	0.683796						6	8	8	7	7	9	6	3	6	3820500000		27.3223	27.1515	26.8625	27.896	27.4104	27.3541	26.6181	27.411	27.2797		tr|A0A0D9S208|A0A0D9S208_CHLSB Uncharacterized protein OS=Chlorocebus sabaeus GN=COX4I1 PE=4 SV=1;sp|P13073|COX41_HUMAN Cytochrome c oxidase subunit 4 isoform 1, mitochondrial OS=Homo sapiens GN=COX4I1 PE=1 SV=1
229	A0A0D9QVC3;P14866;M0QXS5;P14866-2	HNRNPL	Heterogeneous nuclear ribonucleoprotein L	21	20	57	64.132	589	323.31		1.97027	-2.00213	3.9724		1.25422	0.260079	0.587299						20	3	3	2	2	4	1	2	0	3796200000		20.9921	NaN	NaN	20.8437	19.6024	20.2709	21.6794	20.7703	30.1845		tr|A0A0D9QVC3|A0A0D9QVC3_CHLSB Uncharacterized protein OS=Chlorocebus sabaeus GN=HNRNPL PE=4 SV=1;sp|P14866|HNRPL_HUMAN Heterogeneous nuclear ribonucleoprotein L OS=Homo sapiens GN=HNRNPL PE=1 SV=2;tr|M0QXS5|M0QXS5_HUMAN Heterogeneous nuclear ribonucleopro
4055	Q14152;A0A0D9QXL4;Q14152-2	EIF3A	Eukaryotic translation initiation factor 3 subunit A	30	30	24.2	166.57	1382	57.424		-1.4795	-1.99236	0.512863		1.43381	1.54919	0.654837						24	20	20	16	20	22	3	3	3	3779300000		25.6913	26.6143	24.9645	27.1395	27.3002	27.2689	27.7093	27.162	28.3758		sp|Q14152|EIF3A_HUMAN Eukaryotic translation initiation factor 3 subunit A OS=Homo sapiens GN=EIF3A PE=1 SV=1;tr|A0A0D9QXL4|A0A0D9QXL4_CHLSB Eukaryotic translation initiation factor 3 subunit A OS=Chlorocebus sabaeus GN=EIF3A PE=3 SV=1;sp|Q14152-2|EIF3A_HU
1176	A0A0D9R9G2;P18859;P18859-2	ATP5J	ATP synthase-coupling factor 6, mitochondrial	6	6	51.9	12.515	108	188.2		-2.51518	-1.94081	-0.574369		2.60538	2.89774	0.681324	+	+	+_+			5	4	4	5	5	6	3	2	2	3776600000		25.3785	24.8914	25.3365	28.1786	27.9126	27.0607	27.5006	27.0245	26.9037		tr|A0A0D9R9G2|A0A0D9R9G2_CHLSB ATP synthase-coupling factor 6, mitochondrial OS=Chlorocebus sabaeus GN=ATP5J PE=3 SV=1;sp|P18859|ATP5J_HUMAN ATP synthase-coupling factor 6, mitochondrial OS=Homo sapiens GN=ATP5J PE=1 SV=1;sp|P18859-2|ATP5J_HUMAN Isoform 2
769	A0A0D9R3F9;F5H6I7;Q6DD88	ATL3	Atlastin-3	14	14	32.9	60.551	541	114.47		-2.20199	-1.88391	-0.318078		1.52585	1.31602	0.589164	+					11	12	11	14	14	13	7	4	4	3741900000		24.5795	25.0133	26.6983	27.496	27.9556	27.4455	26.9591	27.5202	27.4635		tr|A0A0D9R3F9|A0A0D9R3F9_CHLSB Uncharacterized protein OS=Chlorocebus sabaeus GN=ATL3 PE=4 SV=1;tr|F5H6I7|F5H6I7_HUMAN Atlastin-3 OS=Homo sapiens GN=ATL3 PE=1 SV=1;sp|Q6DD88|ATLA3_HUMAN Atlastin-3 OS=Homo sapiens GN=ATL3 PE=1 SV=1
1222	A0A0D9RAG9;P09497-2;P09497	CLTB	Clathrin light chain B	9	9	37.9	23.215	211	28.983		-4.82547	-5.01852	0.193052		3.42628	5.81716	0.170939	+	+	+_+			8	7	8	4	3	9	1	0	0	3735500000		NaN	NaN	NaN	28.1997	27.3973	26.7351	27.6708	27.5295	27.7109		tr|A0A0D9RAG9|A0A0D9RAG9_CHLSB Clathrin light chain OS=Chlorocebus sabaeus GN=CLTB PE=3 SV=1;sp|P09497-2|CLCB_HUMAN Isoform Non-brain of Clathrin light chain B OS=Homo sapiens GN=CLTB;sp|P09497|CLCB_HUMAN Clathrin light chain B OS=Homo sapiens GN=CLTB PE=1
3880	P27635;X1WI28;A0A0D9SDH3;A0A0D9SAV7;F8W7C6;A0A087WV22;H7C123;H7C2C5	RPL10	60S ribosomal protein L10	10	10	48.1	24.604	214	111.67		0.385766	-0.275054	0.660819		0.577363	0.155778	0.469275						10	8	7	8	8	8	4	5	4	3734300000		27.5379	26.6622	26.7603	26.3844	26.7279	26.6907	26.7327	26.5938	28.459		sp|P27635|RL10_HUMAN 60S ribosomal protein L10 OS=Homo sapiens GN=RPL10 PE=1 SV=4;tr|X1WI28|X1WI28_HUMAN 60S ribosomal protein L10 (Fragment) OS=Homo sapiens GN=RPL10 PE=1 SV=7;tr|A0A0D9SDH3|A0A0D9SDH3_CHLSB Uncharacterized protein OS=Chlorocebus sabaeus G
1703	A0A0D9RI00;E9PDF6;O43795	MYO1B	Unconventional myosin-Ib	60	2	56.2	131.97	1136	323.31		-1.85738	-2.32203	0.464649		1.76495	2.88593	0.461044	+	+	+_+			2	2	2	2	2	2	2	2	2	3728800000		24.7771	25.3409	25.5997	27.9079	26.6548	26.727	27.5702	27.8277	27.2859		tr|A0A0D9RI00|A0A0D9RI00_CHLSB Uncharacterized protein OS=Chlorocebus sabaeus GN=MYO1B PE=3 SV=1;tr|E9PDF6|E9PDF6_HUMAN Unconventional myosin-Ib OS=Homo sapiens GN=MYO1B PE=1 SV=1;sp|O43795|MYO1B_HUMAN Unconventional myosin-Ib OS=Homo sapiens GN=MYO1B PE=1
3522	B9A067;Q16891-2;Q16891-4;Q16891;C9J406;Q16891-3;H7C463	IMMT	MICOS complex subunit MIC60	51	8	58.6	78.973	711	323.31		-1.78334	-1.52064	-0.262702		1.4477	1.23376	0.923572						7	7	6	6	6	6	3	3	4	3701900000		25.8514	24.8297	26.7965	27.7297	27.6146	27.4832	27.1375	27.5218	27.3802		tr|B9A067|B9A067_HUMAN MICOS complex subunit MIC60 OS=Homo sapiens GN=IMMT PE=1 SV=2;sp|Q16891-2|MIC60_HUMAN Isoform 2 of MICOS complex subunit MIC60 OS=Homo sapiens GN=IMMT;sp|Q16891-4|MIC60_HUMAN Isoform 4 of MICOS complex subunit MIC60 OS=Homo sapiens G
3932	P46777;A0A0D9S6R4;A0A0D9SAB7	RPL5	60S ribosomal protein L5	14	14	51.5	34.362	297	36.344		1.18989	0.528472	0.661416		1.55431	0.271426	0.390481						12	8	9	7	8	7	5	6	3	3700700000		28.4459	27.4182	27.475	26.5477	26.8054	26.4163	26.5135	26.579	28.6611		sp|P46777|RL5_HUMAN 60S ribosomal protein L5 OS=Homo sapiens GN=RPL5 PE=1 SV=3;tr|A0A0D9S6R4|A0A0D9S6R4_CHLSB Uncharacterized protein OS=Chlorocebus sabaeus GN=RPL5 PE=4 SV=1;tr|A0A0D9SAB7|A0A0D9SAB7_CHLSB Uncharacterized protein OS=Chlorocebus sabaeus PE=
1036	A0A0D9R7C2;J3QSV6;O76021	RSL1D1	Ribosomal L1 domain-containing protein 1	18	18	40.5	54.613	487	84.666		1.60049	-1.83772	3.43821		2.35437	0.265403	0.548444	+					18	2	2	3	2	2	0	1	0	3693600000		NaN	NaN	NaN	21.5214	21.2955	20.7035	21.9756	21.7243	30.1352		tr|A0A0D9R7C2|A0A0D9R7C2_CHLSB Uncharacterized protein OS=Chlorocebus sabaeus GN=RSL1D1 PE=4 SV=1;tr|J3QSV6|J3QSV6_HUMAN Ribosomal L1 domain-containing protein 1 (Fragment) OS=Homo sapiens GN=RSL1D1 PE=1 SV=1;sp|O76021|RL1D1_HUMAN Ribosomal L1 domain-conta
4103	Q58FF6	HSP90AB4P	Putative heat shock protein HSP 90-beta 4	5	1	8.9	58.264	505	3.7716		-4.68723	-4.92181	0.234587		2.3776	2.59496	0.146602	+	+	+_+			1	1	1	1	1	1	1	0	1	3692600000		NaN	NaN	NaN	28.1622	27.2135	26.5156	27.0469	28.2244	27.3238		sp|Q58FF6|H90B4_HUMAN Putative heat shock protein HSP 90-beta 4 OS=Homo sapiens GN=HSP90AB4P PE=5 SV=1
3337	A0A0D9S9R6;P09669	COX6C	Cytochrome c oxidase subunit 6C	5	5	44	8.6572	75	3.4023		-4.49515	-3.97349	-0.521661		3.8328	3.56485	1.07756	+	+	+_+			4	5	5	4	4	4	0	2	1	3692000000		NaN	NaN	NaN	27.3312	27.8167	27.7292	27.2319	27.3161	26.7642		tr|A0A0D9S9R6|A0A0D9S9R6_CHLSB Uncharacterized protein OS=Chlorocebus sabaeus GN=COX6C PE=4 SV=1;sp|P09669|COX6C_HUMAN Cytochrome c oxidase subunit 6C OS=Homo sapiens GN=COX6C PE=1 SV=2
158	C9J9K3;A0A0C4DG17;P08865;F8WD59	RPSA	40S ribosomal protein SA	13	13	66.2	29.404	263	80.41		0.542332	0.148185	0.394147		0.597907	0.105856	0.503991						12	9	9	7	9	10	7	11	9	3677400000		27.9267	28.0055	26.8013	26.8877	26.9546	27.2642	27.08	27.1366	28.0724		tr|C9J9K3|C9J9K3_HUMAN 40S ribosomal protein SA (Fragment) OS=Homo sapiens GN=RPSA PE=1 SV=8;tr|A0A0C4DG17|A0A0C4DG17_HUMAN 40S ribosomal protein SA OS=Homo sapiens GN=RPSA PE=1 SV=1;sp|P08865|RSSA_HUMAN 40S ribosomal protein SA OS=Homo sapiens GN=RPSA PE=
3723	O00116;A0A0D9RPD5;A0A1B0GWA2	AGPS	Alkyldihydroxyacetonephosphate synthase, peroxisomal	21	21	42.4	72.911	658	56.636		-3.22084	-2.50898	-0.711854		3.0558	2.44732	1.66395	+	+	+_+			16	19	19	16	17	20	5	3	3	3671300000		23.964	24.5615	25.2126	27.8154	27.8419	27.7432	27.316	27.2434	26.7056		sp|O00116|ADAS_HUMAN Alkyldihydroxyacetonephosphate synthase, peroxisomal OS=Homo sapiens GN=AGPS PE=1 SV=1;tr|A0A0D9RPD5|A0A0D9RPD5_CHLSB Alkylglycerone-phosphate synthase OS=Chlorocebus sabaeus GN=AGPS PE=3 SV=1;tr|A0A1B0GWA2|A0A1B0GWA2_HUMAN Alkyldihydr
2776	A0A0D9RZX8;P16435;H0Y4R2;E7EMD0	POR	NADPH--cytochrome P450 reductase	18	18	34.3	76.957	680	85.363		-3.46885	-3.08561	-0.383245		1.48397	1.43916	0.31928	+	+	+_+			14	13	16	13	15	16	4	2	1	3671300000		23.8969	NaN	25.9532	28.5281	27.0927	27.2179	27.3376	26.884	27.4674		tr|A0A0D9RZX8|A0A0D9RZX8_CHLSB NADPH--cytochrome P450 reductase OS=Chlorocebus sabaeus GN=POR PE=3 SV=1;sp|P16435|NCPR_HUMAN NADPH--cytochrome P450 reductase OS=Homo sapiens GN=POR PE=1 SV=2;tr|H0Y4R2|H0Y4R2_HUMAN NADPH--cytochrome P450 reductase (Fragment
2241	A0A0D9RRE9;Q86UL3	AGPAT6	Glycerol-3-phosphate acyltransferase 4	8	8	19.7	52.085	456	18.53		-4.8816	-4.73281	-0.14879		4.16869	3.8191	0.143802	+	+	+_+			5	8	4	3	4	4	0	0	0	3648200000		NaN	NaN	NaN	27.202	28.0191	27.5013	27.3142	27.993	26.9689		tr|A0A0D9RRE9|A0A0D9RRE9_CHLSB Uncharacterized protein OS=Chlorocebus sabaeus GN=GPAT4 PE=4 SV=1;sp|Q86UL3|GPAT4_HUMAN Glycerol-3-phosphate acyltransferase 4 OS=Homo sapiens GN=GPAT4 PE=1 SV=1
630	A0A0D9R1G6;A1L0T0;M0R026	ILVBL	Acetolactate synthase-like protein	18	18	48.4	67.893	632	79.056		-5.28776	-5.23675	-0.0510095		3.94414	3.84719	0.0734613	+	+	+_+			12	15	15	14	13	13	0	0	0	3633200000		NaN	NaN	NaN	27.1792	27.6604	27.6165	27.6169	27.6299	27.0562		tr|A0A0D9R1G6|A0A0D9R1G6_CHLSB Uncharacterized protein OS=Chlorocebus sabaeus GN=ILVBL PE=3 SV=1;sp|A1L0T0|ILVBL_HUMAN Acetolactate synthase-like protein OS=Homo sapiens GN=ILVBL PE=1 SV=2;tr|M0R026|M0R026_HUMAN Acetolactate synthase-like protein OS=Homo s
2269	Q5T8U5;A0A0D9RRU6;O15260-2;O15260;O15260-3	SURF4	Surfeit locus protein 4	4	4	26.3	21.127	186	150.21		-4.42251	-4.04118	-0.381327		2.8124	2.50102	0.408056	+	+	+_+			3	4	4	4	4	4	0	0	0	3631400000		NaN	NaN	NaN	26.6084	27.3141	26.9706	27.0479	26.7811	25.9201		tr|Q5T8U5|Q5T8U5_HUMAN Surfeit 4 OS=Homo sapiens GN=SURF4 PE=1 SV=1;tr|A0A0D9RRU6|A0A0D9RRU6_CHLSB Uncharacterized protein OS=Chlorocebus sabaeus GN=SURF4 PE=4 SV=1;sp|O15260-2|SURF4_HUMAN Isoform 2 of Surfeit locus protein 4 OS=Homo sapiens GN=SURF4;sp|O1
63	B7Z879;A0A0D9S3R5;A0A087WXL6;Q9H270	VPS11	Vacuolar protein sorting-associated protein 11 homolog	20	19	24.7	107.37	931	37.369		-4.69636	-5.06552	0.369164		3.66438	3.84449	0.855448	+	+	+_+			12	14	16	12	11	15	1	0	0	3604400000		NaN	NaN	NaN	27.6292	27.126	27.215	27.7359	27.8881	27.4538		tr|B7Z879|B7Z879_HUMAN Vacuolar protein sorting-associated protein 11 homolog OS=Homo sapiens GN=VPS11 PE=1 SV=1;tr|A0A0D9S3R5|A0A0D9S3R5_CHLSB Uncharacterized protein OS=Chlorocebus sabaeus GN=VPS11 PE=4 SV=1;tr|A0A087WXL6|A0A087WXL6_HUMAN Vacuolar protei
1934	A0A0D9RLE7	NDUFA4	Uncharacterized protein	3	3	35.8	9.3968	81	6.6389		-5.19756	-5.18016	-0.017395		3.19975	3.22406	0.0263173	+	+	+_+			2	3	3	2	3	2	1	1	1	3603300000		NaN	NaN	NaN	27.5547	27.0435	27.0341	27.2819	27.3787	26.9196		tr|A0A0D9RLE7|A0A0D9RLE7_CHLSB Uncharacterized protein OS=Chlorocebus sabaeus GN=NDUFA4 PE=4 SV=1
3267	A0A0D9S887;O95372;Q5QPQ1;Q5QPQ0;Q5QPQ3;Q5QPQ2	LYPLA2	Acyl-protein thioesterase 2	7	7	40.7	24.737	231	106.13		1.69034	1.63744	0.0529029		4.62975	4.07296	0.243949	+	+	+_+			5	5	7	6	6	7	7	6	7	3601200000		28.2935	28.5198	28.4126	26.7025	26.6625	26.7899	26.9247	26.6846	26.7044		tr|A0A0D9S887|A0A0D9S887_CHLSB Uncharacterized protein OS=Chlorocebus sabaeus GN=LYPLA2 PE=4 SV=1;sp|O95372|LYPA2_HUMAN Acyl-protein thioesterase 2 OS=Homo sapiens GN=LYPLA2 PE=1 SV=1;tr|Q5QPQ1|Q5QPQ1_HUMAN Acyl-protein thioesterase 2 (Fragment) OS=Homo sa
155	A0A0C4DFM1;A0A0D9RJP5;Q92544	TM9SF4	Transmembrane 9 superfamily member 4	11	11	23.4	72.54	625	81.899		-4.18985	-3.9225	-0.267356		1.65806	1.57068	0.557562	+	+	+_+			9	11	11	11	11	8	2	0	0	3596200000		NaN	NaN	25.6617	27.4999	27.8818	27.3367	27.3926	27.4891	27.0346		tr|A0A0C4DFM1|A0A0C4DFM1_HUMAN Transmembrane 9 superfamily member OS=Homo sapiens GN=TM9SF4 PE=1 SV=1;tr|A0A0D9RJP5|A0A0D9RJP5_CHLSB Transmembrane 9 superfamily member OS=Chlorocebus sabaeus GN=TM9SF4 PE=3 SV=1;sp|Q92544|TM9S4_HUMAN Transmembrane 9 superfa
4361	Q9Y6D5	ARFGEF2	Brefeldin A-inhibited guanine nucleotide-exchange protein 2	57	10	37.3	202.04	1785	318.24		-3.88741	-3.15857	-0.72884		2.55927	2.05924	0.819032	+	+	+_+			5	10	9	10	9	10	1	2	3	3594600000		24.5615	24.186	NaN	27.4855	27.5425	28.1249	27.0881	27.5531	26.3253		sp|Q9Y6D5|BIG2_HUMAN Brefeldin A-inhibited guanine nucleotide-exchange protein 2 OS=Homo sapiens GN=ARFGEF2 PE=1 SV=3
3158	A0A0D9S6Q3;F8VWZ8;Q52LW3	ARHGAP29	Rho GTPase-activating protein 29	26	26	24.8	142.79	1266	280.72		-2.78233	-3.02646	0.244127		2.35883	2.48707	0.265169	+	+	+_+			20	21	21	17	19	21	3	4	5	3593500000		24.8942	23.7459	25.0106	27.8182	27.2425	26.9369	27.1079	28.0123	27.6099		tr|A0A0D9S6Q3|A0A0D9S6Q3_CHLSB Uncharacterized protein OS=Chlorocebus sabaeus GN=ARHGAP29 PE=4 SV=1;tr|F8VWZ8|F8VWZ8_HUMAN Rho GTPase-activating protein 29 OS=Homo sapiens GN=ARHGAP29 PE=1 SV=1;sp|Q52LW3|RHG29_HUMAN Rho GTPase-activating protein 29 OS=Homo
3729	O14828;O14828-2;A0A0D9S580	SCAMP3	Secretory carrier-associated membrane protein 3	10	10	32.3	38.287	347	152.8		-2.57925	-2.17505	-0.404205		1.8819	1.64058	0.322495	+	+	+_+			8	9	8	10	9	9	3	2	1	3590700000		25.4245	23.9489	25.3791	26.972	28.198	27.3202	27.0201	27.7537	26.5038		sp|O14828|SCAM3_HUMAN Secretory carrier-associated membrane protein 3 OS=Homo sapiens GN=SCAMP3 PE=1 SV=3;sp|O14828-2|SCAM3_HUMAN Isoform 2 of Secretory carrier-associated membrane protein 3 OS=Homo sapiens GN=SCAMP3;tr|A0A0D9S580|A0A0D9S580_CHLSB Secretor
1966	A0A0D9RLU6;O95816;O95816-2	BAG2	BAG family molecular chaperone regulator 2	11	11	57.3	23.758	211	54.76		-0.284443	-0.691896	0.407453		0.873373	2.17852	1.52133						10	7	8	8	10	7	4	4	3	3585600000		26.6565	26.5926	26.9591	27.0663	26.8272	27.1681	27.3452	27.5702	27.3686		tr|A0A0D9RLU6|A0A0D9RLU6_CHLSB Uncharacterized protein OS=Chlorocebus sabaeus GN=BAG2 PE=4 SV=1;sp|O95816|BAG2_HUMAN BAG family molecular chaperone regulator 2 OS=Homo sapiens GN=BAG2 PE=1 SV=1;sp|O95816-2|BAG2_HUMAN Isoform 2 of BAG family molecular chape
1316	A0A0D9RBT6;Q9UI10;E7ERK9	EIF2B4	Translation initiation factor eIF-2B subunit delta	28	7	63.1	57.486	523	323.31		-5.09682	-4.87101	-0.225805		3.8161	3.23807	0.254659	+	+	+_+			7	7	6	6	7	7	0	0	0	3563000000		NaN	NaN	NaN	27.4423	27.6164	27.7575	27.7056	27.7338	26.6994		tr|A0A0D9RBT6|A0A0D9RBT6_CHLSB Uncharacterized protein OS=Chlorocebus sabaeus GN=EIF2B4 PE=3 SV=1;sp|Q9UI10|EI2BD_HUMAN Translation initiation factor eIF-2B subunit delta OS=Homo sapiens GN=EIF2B4 PE=1 SV=2;tr|E7ERK9|E7ERK9_HUMAN Translation initiation fac
3208	A0A0D9S7G7	EIF2B3	Uncharacterized protein	22	8	58.6	46.839	418	323.31		-4.71336	-4.30439	-0.408969		3.09067	2.71525	0.566664	+	+	+_+			6	6	5	6	5	6	1	2	1	3561300000		23.9045	NaN	NaN	27.4862	27.6201	27.8184	27.4024	27.6565	26.6388		tr|A0A0D9S7G7|A0A0D9S7G7_CHLSB Uncharacterized protein OS=Chlorocebus sabaeus GN=EIF2B3 PE=4 SV=1
2473	A0A0D9RUT2;P14868;P14868-2	DARS	Aspartate--tRNA ligase, cytoplasmic	24	24	55.3	57.152	501	162.97		-0.18674	-0.263909	0.0771688		0.246087	0.561379	0.0836899						20	18	15	14	19	18	12	12	12	3560500000		27.0926	26.8023	27.189	27.7666	26.9049	26.9726	27.0433	27.207	27.6253		tr|A0A0D9RUT2|A0A0D9RUT2_CHLSB Uncharacterized protein OS=Chlorocebus sabaeus GN=DARS PE=4 SV=1;sp|P14868|SYDC_HUMAN Aspartate--tRNA ligase, cytoplasmic OS=Homo sapiens GN=DARS PE=1 SV=2;sp|P14868-2|SYDC_HUMAN Isoform 2 of Aspartate--tRNA ligase, cytoplasm
3516	B4DR61;P61619;A0A0D9R899;P61619-3	SEC61A1	Protein transport protein Sec61 subunit alpha isoform 1	8	6	12.7	52.949	482	25.789		-5.33607	-4.9693	-0.366769		4.35745	3.31044	0.326054	+	+	+_+			5	6	6	6	6	6	1	1	1	3559500000		NaN	NaN	NaN	27.7378	27.8359	27.2673	27.4111	27.8919	26.4377		tr|B4DR61|B4DR61_HUMAN Protein transport protein Sec61 subunit alpha isoform 1 OS=Homo sapiens GN=SEC61A1 PE=1 SV=1;sp|P61619|S61A1_HUMAN Protein transport protein Sec61 subunit alpha isoform 1 OS=Homo sapiens GN=SEC61A1 PE=1 SV=2;tr|A0A0D9R899|A0A0D9R899_
2042	A0A0D9RN81;Q6P2Q9	PRPF8	Pre-mRNA-processing-splicing factor 8	55	55	33.5	273.6	2335	323.31		-3.5121	-4.59211	1.08		3.44349	2.00651	0.448513	+	+	+_+			54	19	18	13	15	13	0	1	0	3551500000		NaN	NaN	NaN	25.7512	26.5086	26.7643	26.3325	26.5331	29.3986		tr|A0A0D9RN81|A0A0D9RN81_CHLSB Uncharacterized protein OS=Chlorocebus sabaeus GN=PRPF8 PE=4 SV=1;sp|Q6P2Q9|PRP8_HUMAN Pre-mRNA-processing-splicing factor 8 OS=Homo sapiens GN=PRPF8 PE=1 SV=2
1500	A0A0D9REU0;O00567	NOP56	Nucleolar protein 56	30	30	58.1	66.039	594	124.62		-1.66137	-3.80848	2.14711		1.4607	0.958425	0.4893						30	6	6	4	6	3	0	1	0	3546500000		NaN	NaN	NaN	23.1793	24.4046	24.7872	24.3864	24.4582	29.9679		tr|A0A0D9REU0|A0A0D9REU0_CHLSB Uncharacterized protein OS=Chlorocebus sabaeus GN=NOP56 PE=4 SV=1;sp|O00567|NOP56_HUMAN Nucleolar protein 56 OS=Homo sapiens GN=NOP56 PE=1 SV=4
2846	A0A0D9S1D0;O75691	UTP20	Small subunit processome component 20 homolog	51	51	22.7	318.37	2785	323.31		-3.55387	-4.23218	0.67831		2.00831	2.27493	1.16772	+	+	+_+			41	44	39	35	36	36	1	2	1	3535500000		24.9791	NaN	NaN	26.6678	27.2767	27.1958	27.8267	28.0009	27.3477		tr|A0A0D9S1D0|A0A0D9S1D0_CHLSB Uncharacterized protein OS=Chlorocebus sabaeus GN=UTP20 PE=4 SV=1;sp|O75691|UTP20_HUMAN Small subunit processome component 20 homolog OS=Homo sapiens GN=UTP20 PE=1 SV=3
3874	P25398;A0A0D9RVW4;A0A0D9SAW5;A0A0D9SB35	RPS12	40S ribosomal protein S12	8	8	71.2	14.515	132	86.158		0.61119	0.00540924	0.60578		0.839463	0.00371064	0.799836						8	5	5	5	6	6	6	5	5	3528700000		27.9102	27.4878	26.7761	26.6529	26.8014	26.8861	26.9403	27.1563	28.0612		sp|P25398|RS12_HUMAN 40S ribosomal protein S12 OS=Homo sapiens GN=RPS12 PE=1 SV=3;tr|A0A0D9RVW4|A0A0D9RVW4_CHLSB 40S ribosomal protein S12 OS=Chlorocebus sabaeus PE=3 SV=1;tr|A0A0D9SAW5|A0A0D9SAW5_CHLSB 40S ribosomal protein S12 OS=Chlorocebus sabaeus PE=3
3110	A0A0D9S5R4;Q96HS1-2;Q96HS1	PGAM5	Serine/threonine-protein phosphatase PGAM5, mitochondrial	11	11	42.1	31.512	285	92.893		-4.03591	-4.49034	0.454435		1.29167	1.40733	0.698114	+	+	+_+			10	8	9	8	8	5	2	1	1	3520400000		NaN	NaN	26.029	27.121	27.3433	26.971	27.6233	27.1095	28.0658		tr|A0A0D9S5R4|A0A0D9S5R4_CHLSB Uncharacterized protein OS=Chlorocebus sabaeus GN=PGAM5 PE=4 SV=1;sp|Q96HS1-2|PGAM5_HUMAN Isoform 2 of Serine/threonine-protein phosphatase PGAM5, mitochondrial OS=Homo sapiens GN=PGAM5;sp|Q96HS1|PGAM5_HUMAN Serine/threonine-
847	A0A0D9R4I4;P07996;P07996-2	THBS1	Thrombospondin-1	34	12	31	129.42	1170	191.22		-1.26696	-2.25327	0.986303		0.365557	0.742603	0.860252						9	9	10	6	4	9	1	3	5	3505100000		26.9821	27.1698	NaN	27.8869	26.7163	26.3203	27.8165	27.6165	28.4494		tr|A0A0D9R4I4|A0A0D9R4I4_CHLSB Uncharacterized protein OS=Chlorocebus sabaeus GN=THBS1 PE=4 SV=1;sp|P07996|TSP1_HUMAN Thrombospondin-1 OS=Homo sapiens GN=THBS1 PE=1 SV=2;sp|P07996-2|TSP1_HUMAN Isoform 2 of Thrombospondin-1 OS=Homo sapiens GN=THBS1
3383	A0A0D9SB62;P62851;A0A0D9SA45;A0A0D9SDJ1;A0A0D9S3Q5	RPS25	40S ribosomal protein S25	6	6	35.8	13.613	123	8.7186		-0.500502	-0.77163	0.271128		1.16325	0.871925	0.280786						5	4	5	4	5	4	4	4	5	3501100000		27.024	26.4381	26.6294	27.0403	27.3986	27.154	27.1131	27.0767	28.2165		tr|A0A0D9SB62|A0A0D9SB62_CHLSB Uncharacterized protein OS=Chlorocebus sabaeus PE=4 SV=1;sp|P62851|RS25_HUMAN 40S ribosomal protein S25 OS=Homo sapiens GN=RPS25 PE=1 SV=1;tr|A0A0D9SA45|A0A0D9SA45_CHLSB Uncharacterized protein OS=Chlorocebus sabaeus PE=4 SV=
1527	A0A0D9RFA7;P60468	SEC61B	Protein transport protein Sec61 subunit beta	4	4	41.7	9.9743	96	43.23		-5.03994	-4.88674	-0.153207		4.45738	4.01938	0.18101	+	+	+_+			4	4	4	3	3	4	1	1	0	3494400000		NaN	NaN	NaN	27.0866	27.7253	27.4695	27.4167	27.6415	26.7636		tr|A0A0D9RFA7|A0A0D9RFA7_CHLSB Uncharacterized protein OS=Chlorocebus sabaeus GN=SEC61B PE=4 SV=1;sp|P60468|SC61B_HUMAN Protein transport protein Sec61 subunit beta OS=Homo sapiens GN=SEC61B PE=1 SV=2
3536	C9JRZ6;Q9NX63;F8WAR4	CHCHD3	MICOS complex subunit MIC19	12	3	40.9	26.694	232	100.21		-4.89038	-4.79098	-0.0993983		4.71505	4.02782	0.136211	+	+	+_+			2	3	2	3	3	1	1	1	1	3494000000		NaN	NaN	NaN	27.305	27.6105	27.649	26.9351	27.6011	27.7301		tr|C9JRZ6|C9JRZ6_HUMAN MICOS complex subunit OS=Homo sapiens GN=CHCHD3 PE=1 SV=1;sp|Q9NX63|MIC19_HUMAN MICOS complex subunit MIC19 OS=Homo sapiens GN=CHCHD3 PE=1 SV=1;tr|F8WAR4|F8WAR4_HUMAN MICOS complex subunit OS=Homo sapiens GN=CHCHD3 PE=1 SV=1
3303	A0A0D9S8R4;Q15836	VAMP3	Vesicle-associated membrane protein 3	5	5	53	11.279	100	323.31		-1.26576	-0.929514	-0.336243		2.51632	1.5843	0.805463						5	5	5	5	5	5	3	3	2	3493300000		26.0253	26.0615	26.6209	27.5577	27.5302	27.4171	27.2942	27.4073	26.7948		tr|A0A0D9S8R4|A0A0D9S8R4_CHLSB Uncharacterized protein OS=Chlorocebus sabaeus GN=VAMP3 PE=4 SV=1;sp|Q15836|VAMP3_HUMAN Vesicle-associated membrane protein 3 OS=Homo sapiens GN=VAMP3 PE=1 SV=3
1028	E9PKZ0;A0A0D9R787;P62917;A0A0D9SDK4;E9PKU4;G3V1A1;A0A0D9R535	RPL8	60S ribosomal protein L8	11	11	51.2	22.389	205	163.49		0.11158	-0.317155	0.428734		0.091172	0.154304	0.261067						11	6	9	6	6	6	4	5	3	3488500000		27.3419	27.2794	26.0529	26.8596	26.9329	26.547	26.3879	26.7598	28.478		tr|E9PKZ0|E9PKZ0_HUMAN 60S ribosomal protein L8 (Fragment) OS=Homo sapiens GN=RPL8 PE=1 SV=1;tr|A0A0D9R787|A0A0D9R787_CHLSB Uncharacterized protein OS=Chlorocebus sabaeus PE=3 SV=1;sp|P62917|RL8_HUMAN 60S ribosomal protein L8 OS=Homo sapiens GN=RPL8 PE=1 S
3881	P27824;P27824-2;P27824-3	CANX	Calnexin	28	5	45.8	67.567	592	323.31		-1.05598	0.245943	-1.30192		1.40082	0.19857	1.59181						5	5	5	5	5	5	2	2	3	3487500000		26.2788	26.4422	27.3217	27.8349	27.9081	27.4676	27.0596	26.3948	25.8504		sp|P27824|CALX_HUMAN Calnexin OS=Homo sapiens GN=CANX PE=1 SV=2;sp|P27824-2|CALX_HUMAN Isoform 2 of Calnexin OS=Homo sapiens GN=CANX;sp|P27824-3|CALX_HUMAN Isoform 3 of Calnexin OS=Homo sapiens GN=CANX
1095	A0A0D9R8B1;Q9Y265;Q9Y265-2;H7C4G5	RUVBL1	RuvB-like 1	17	17	50.2	50.227	456	217.02		-3.12303	-3.05535	-0.0676785		1.08493	1.05188	0.0928966	+					16	14	14	15	14	14	7	4	3	3472700000		24.9001	NaN	26.2677	27.1597	27.4857	27.6133	27.4224	26.9369	27.6964		tr|A0A0D9R8B1|A0A0D9R8B1_CHLSB RuvB-like helicase OS=Chlorocebus sabaeus GN=RUVBL1 PE=3 SV=1;sp|Q9Y265|RUVB1_HUMAN RuvB-like 1 OS=Homo sapiens GN=RUVBL1 PE=1 SV=1;sp|Q9Y265-2|RUVB1_HUMAN Isoform 2 of RuvB-like 1 OS=Homo sapiens GN=RUVBL1;tr|H7C4G5|H7C4G5_H
1481	A0A0D9REF3;Q9BZX2;Q9BZX2-2	UCK2	Uridine-cytidine kinase 2	13	13	55.6	29.299	261	120.02		-1.14285	-1.18523	0.0423787		1.16054	1.50535	0.0406852						11	12	12	12	13	12	4	4	5	3461500000		26.2968	26.4748	25.3994	26.5842	27.3438	27.6715	27.4299	27.3464	26.9504		tr|A0A0D9REF3|A0A0D9REF3_CHLSB Uridine kinase OS=Chlorocebus sabaeus GN=UCK2 PE=3 SV=1;sp|Q9BZX2|UCK2_HUMAN Uridine-cytidine kinase 2 OS=Homo sapiens GN=UCK2 PE=1 SV=1;sp|Q9BZX2-2|UCK2_HUMAN Isoform 2 of Uridine-cytidine kinase 2 OS=Homo sapiens GN=UCK2
286	A0A0D9QW63;A0A0C4DGQ5;P04632;K7EIV0;K7ELJ7;A0A075B7C0;U3KQE2;K7EM73;K7EKD8	CAPNS1	Calpain small subunit 1	13	13	67.7	28.201	266	133.03		-0.22603	0.108649	-0.334679		0.430498	0.14274	0.895118						11	11	10	12	9	9	6	6	4	3458100000		27.0069	26.655	27.4274	27.2177	27.2494	27.3002	27.2177	26.926	26.6196		tr|A0A0D9QW63|A0A0D9QW63_CHLSB Uncharacterized protein OS=Chlorocebus sabaeus GN=CAPNS1 PE=4 SV=1;tr|A0A0C4DGQ5|A0A0C4DGQ5_HUMAN Calpain small subunit 1 OS=Homo sapiens GN=CAPNS1 PE=1 SV=1;sp|P04632|CPNS1_HUMAN Calpain small subunit 1 OS=Homo sapiens GN=CA
991	A0A0D9R6M6;O95831-3;O95831;O95831-2;E9PMA0;O95831-5	AIFM1	Apoptosis-inducing factor 1, mitochondrial	13	13	25.1	66.811	613	76.774		-1.18877	-1.10191	-0.0868657		1.8472	3.68327	0.112024						11	10	10	9	12	13	4	3	2	3457300000		26.1408	26.2405	25.9941	27.5778	26.7599	27.604	27.1796	27.32	27.1815		tr|A0A0D9R6M6|A0A0D9R6M6_CHLSB Uncharacterized protein OS=Chlorocebus sabaeus GN=AIFM1 PE=4 SV=1;sp|O95831-3|AIFM1_HUMAN Isoform 3 of Apoptosis-inducing factor 1, mitochondrial OS=Homo sapiens GN=AIFM1;sp|O95831|AIFM1_HUMAN Apoptosis-inducing factor 1, mit
2421	A0A0D9RU25	NDUFAF2	Uncharacterized protein	11	11	63.3	19.721	169	77.998		-5.44773	-5.34649	-0.10124		3.47631	3.21574	0.0955123	+	+	+_+			8	10	10	10	9	9	0	1	1	3449200000		NaN	NaN	NaN	27.0598	27.5462	27.6908	27.4126	27.853	26.7275		tr|A0A0D9RU25|A0A0D9RU25_CHLSB Uncharacterized protein OS=Chlorocebus sabaeus GN=NDUFAF2 PE=4 SV=1
3882	P28288;A0A0D9S6Q2;P28288-2	ABCD3	ATP-binding cassette sub-family D member 3	19	19	34.9	75.475	659	137.77		-4.31682	-4.60335	0.286533		3.57511	3.51134	0.609402	+	+	+_+			14	17	14	14	13	13	1	1	0	3429600000		NaN	NaN	NaN	27.0792	27.382	27.2791	27.8085	27.6258	27.1657		sp|P28288|ABCD3_HUMAN ATP-binding cassette sub-family D member 3 OS=Homo sapiens GN=ABCD3 PE=1 SV=1;tr|A0A0D9S6Q2|A0A0D9S6Q2_CHLSB Uncharacterized protein OS=Chlorocebus sabaeus GN=ABCD3 PE=4 SV=1;sp|P28288-2|ABCD3_HUMAN Isoform 2 of ATP-binding cassette s
3915	P39019;A0A0D9S109;A0A075B6E2	RPS19	40S ribosomal protein S19	8	8	42.8	16.06	145	15.022		0.359415	-0.303916	0.663331		0.692197	0.262155	0.712866						5	7	8	5	6	6	6	6	8	3417800000		27.5565	27.4963	26.8961	27.0517	27.0757	26.7432	27.1537	27.2664	28.4405		sp|P39019|RS19_HUMAN 40S ribosomal protein S19 OS=Homo sapiens GN=RPS19 PE=1 SV=2;tr|A0A0D9S109|A0A0D9S109_CHLSB Uncharacterized protein OS=Chlorocebus sabaeus PE=4 SV=1;tr|A0A075B6E2|A0A075B6E2_HUMAN 40S ribosomal protein S19 OS=Homo sapiens GN=RPS19 PE=1
1204	A0A0D9RA33;P35249;C9JZI1;P35249-2	RFC4	Replication factor C subunit 4	13	13	43.8	39.775	363	268.23		-0.592785	-0.369979	-0.222806		1.25383	1.2538	0.507965						11	11	11	13	13	13	6	7	7	3407500000		26.4739	26.7632	26.9001	27.0252	27.2413	27.6492	26.9669	27.1546	27.1257		tr|A0A0D9RA33|A0A0D9RA33_CHLSB Uncharacterized protein OS=Chlorocebus sabaeus GN=RFC4 PE=4 SV=1;sp|P35249|RFC4_HUMAN Replication factor C subunit 4 OS=Homo sapiens GN=RFC4 PE=1 SV=2;tr|C9JZI1|C9JZI1_HUMAN Replication factor C subunit 4 OS=Homo sapiens GN=R
2935	A0A0D9S2R2;P30154;P30154-2;P30154-4;P30154-3;P30154-5	PPP2R1B	Serine/threonine-protein phosphatase 2A 65 kDa regulatory subunit A beta isoform	27	17	61.9	65.941	599	153.4		-4.13996	-3.83681	-0.30315		2.33209	2.23632	0.652536	+	+	+_+			15	17	15	14	15	17	3	1	1	3400000000		NaN	NaN	24.7194	27.1839	27.7787	27.5391	27.1379	27.0267	27.4278		tr|A0A0D9S2R2|A0A0D9S2R2_CHLSB Uncharacterized protein OS=Chlorocebus sabaeus GN=PPP2R1B PE=4 SV=1;sp|P30154|2AAB_HUMAN Serine/threonine-protein phosphatase 2A 65 kDa regulatory subunit A beta isoform OS=Homo sapiens GN=PPP2R1B PE=1 SV=3;sp|P30154-2|2AAB_H
2432	A0A0D9RU72;Q5UIP0-2;Q5UIP0	RIF1	Telomere-associated protein RIF1	38	38	20.6	273.55	2465	189.35		-4.20624	-4.17712	-0.0291131		3.34963	3.63423	0.0205901	+	+	+_+			23	31	27	24	24	20	0	0	1	3399800000		NaN	NaN	NaN	26.6134	27.6421	27.7714	27.5582	27.658	26.7234		tr|A0A0D9RU72|A0A0D9RU72_CHLSB Uncharacterized protein OS=Chlorocebus sabaeus GN=RIF1 PE=4 SV=1;sp|Q5UIP0-2|RIF1_HUMAN Isoform 2 of Telomere-associated protein RIF1 OS=Homo sapiens GN=RIF1;sp|Q5UIP0|RIF1_HUMAN Telomere-associated protein RIF1 OS=Homo sapie
1566	A0A0D9RFX6;Q9NPQ8-4;Q9NPQ8;Q9NPQ8-2;Q9NPQ8-3	RIC8A	Synembryn-A	20	19	45.5	59.532	530	109.35		-4.70888	-4.7039	-0.0049839		3.89638	3.97312	0.014807	+	+	+_+			16	16	18	12	14	16	0	0	0	3398400000		NaN	NaN	NaN	27.6011	27.2423	27.4066	27.3641	27.3779	27.4931		tr|A0A0D9RFX6|A0A0D9RFX6_CHLSB Uncharacterized protein OS=Chlorocebus sabaeus GN=RIC8A PE=4 SV=1;sp|Q9NPQ8-4|RIC8A_HUMAN Isoform 4 of Synembryn-A OS=Homo sapiens GN=RIC8A;sp|Q9NPQ8|RIC8A_HUMAN Synembryn-A OS=Homo sapiens GN=RIC8A PE=1 SV=3;sp|Q9NPQ8-2|RIC8
3730	O14893;O14893-2;H0YEL0;O14893-3	GEMIN2	Gem-associated protein 2	11	11	43.2	31.585	280	48.021		-4.80764	-4.55164	-0.255996		4.93979	4.28714	0.441033	+	+	+_+			10	9	9	9	11	11	1	0	0	3392500000		NaN	NaN	NaN	27.165	27.4236	27.6066	27.4374	27.2627	26.7272		sp|O14893|GEMI2_HUMAN Gem-associated protein 2 OS=Homo sapiens GN=GEMIN2 PE=1 SV=1;sp|O14893-2|GEMI2_HUMAN Isoform 2 of Gem-associated protein 2 OS=Homo sapiens GN=GEMIN2;tr|H0YEL0|H0YEL0_HUMAN Gem-associated protein 2 (Fragment) OS=Homo sapiens GN=GEMIN2
2749	A0A0D9RZJ3;P05121;P05121-2	SERPINE1	Plasminogen activator inhibitor 1	17	17	53.7	45.082	402	53.508		-3.70333	-3.59551	-0.107821		2.00027	1.96685	0.0783155	+	+	+_+			13	16	15	15	13	15	1	4	1	3370500000		25.0655	NaN	NaN	26.7098	27.9212	27.3382	27.4389	27.6524	26.5543		tr|A0A0D9RZJ3|A0A0D9RZJ3_CHLSB Uncharacterized protein OS=Chlorocebus sabaeus GN=SERPINE1 PE=3 SV=1;sp|P05121|PAI1_HUMAN Plasminogen activator inhibitor 1 OS=Homo sapiens GN=SERPINE1 PE=1 SV=1;sp|P05121-2|PAI1_HUMAN Isoform 2 of Plasminogen activator inhib
3903	P35080;A0A0D9RGK7;C9J712;C9J2N0;C9JQ45	PFN2	Profilin-2;Profilin	8	3	82.1	15.046	140	18.648		3.38679	3.61792	-0.231124		3.03184	2.27948	0.146746	+	+	+_+			2	3	3	3	3	3	3	3	3	3368800000		29.1097	29.0356	30.0995	25.7535	26.3586	25.9723	26.6129	26.0494	24.7287		sp|P35080|PROF2_HUMAN Profilin-2 OS=Homo sapiens GN=PFN2 PE=1 SV=3;tr|A0A0D9RGK7|A0A0D9RGK7_CHLSB Profilin OS=Chlorocebus sabaeus PE=3 SV=1;tr|C9J712|C9J712_HUMAN Profilin OS=Homo sapiens GN=PFN2 PE=1 SV=1;tr|C9J2N0|C9J2N0_HUMAN Profilin OS=Homo sapiens GN
493	A0A0D9QZH2	GBF1	Uncharacterized protein	62	10	49	206.13	1856	323.31		-4.30686	-4.11932	-0.187541		3.82201	3.4091	0.144463	+	+	+_+			6	10	9	8	7	8	0	0	0	3366000000		NaN	NaN	NaN	26.8329	27.3792	27.8899	27.8545	27.1184	26.5666		tr|A0A0D9QZH2|A0A0D9QZH2_CHLSB Uncharacterized protein OS=Chlorocebus sabaeus GN=GBF1 PE=4 SV=1
2524	A0A0D9RVW0;Q9BRX2	PELO	Protein pelota homolog	12	12	42.3	43.435	385	89.185		1.21255	1.5698	-0.357258		2.76541	2.5692	0.642879		+				10	10	10	10	10	10	7	8	8	3362500000		28.2003	28.3878	28.0455	26.7417	27.114	27.1401	26.8969	26.814	26.2132		tr|A0A0D9RVW0|A0A0D9RVW0_CHLSB Protein pelota homolog OS=Chlorocebus sabaeus GN=PELO PE=3 SV=1;sp|Q9BRX2|PELO_HUMAN Protein pelota homolog OS=Homo sapiens GN=PELO PE=1 SV=2
4346	Q9Y2X7;Q9Y2X7-3;A0A0C4DGN6;J3QRU8	GIT1	ARF GTPase-activating protein GIT1	39	8	62.3	84.34	761	323.31		-4.62446	-4.38155	-0.242914		3.88718	3.76219	1.07069	+	+	+_+			8	8	8	8	8	8	0	0	0	3341300000		NaN	NaN	NaN	27.6453	27.4946	27.4421	27.353	27.1106	27.3895		sp|Q9Y2X7|GIT1_HUMAN ARF GTPase-activating protein GIT1 OS=Homo sapiens GN=GIT1 PE=1 SV=2;sp|Q9Y2X7-3|GIT1_HUMAN Isoform 3 of ARF GTPase-activating protein GIT1 OS=Homo sapiens GN=GIT1;tr|A0A0C4DGN6|A0A0C4DGN6_HUMAN ARF GTPase-activating protein GIT1 OS=Ho
393	A0A0D9QY36;Q96ER3;E9PRZ1	SAAL1	Protein SAAL1	16	5	42.9	53.39	473	323.31		-4.78233	-4.34171	-0.440622		4.74101	5.30232	1.01845	+	+	+_+			4	4	4	4	4	5	0	0	0	3334700000		NaN	NaN	NaN	27.982	27.413	27.4847	27.2378	27.3203	26.9998		tr|A0A0D9QY36|A0A0D9QY36_CHLSB Uncharacterized protein OS=Chlorocebus sabaeus GN=SAAL1 PE=4 SV=1;sp|Q96ER3|SAAL1_HUMAN Protein SAAL1 OS=Homo sapiens GN=SAAL1 PE=1 SV=2;tr|E9PRZ1|E9PRZ1_HUMAN Protein SAAL1 OS=Homo sapiens GN=SAAL1 PE=1 SV=1
2321	A0A0D9RSP2;Q15678	PTPN14	Tyrosine-protein phosphatase non-receptor type 14	21	21	25.5	135.16	1187	116.52	594	-2.98626	-3.40524	0.418987		1.55965	1.66731	0.57098	+	+	+_+			11	15	19	13	16	16	1	2	2	3330200000		24.6155	25.251	NaN	27.0288	26.9133	27.2474	27.4586	28.0328	26.955		tr|A0A0D9RSP2|A0A0D9RSP2_CHLSB Tyrosine-protein phosphatase non-receptor type OS=Chlorocebus sabaeus GN=PTPN14 PE=3 SV=1;sp|Q15678|PTN14_HUMAN Tyrosine-protein phosphatase non-receptor type 14 OS=Homo sapiens GN=PTPN14 PE=1 SV=2
206	A0A0D9QV09;P62249;M0R210;M0R3H0;M0R1M5;A0A087WZ27;Q6IPX4;M0QX76	RPS16;ZNF90	40S ribosomal protein S16	10	10	59.6	16.445	146	18.43		0.0565268	-0.340689	0.397216		0.0752443	0.284345	0.416724						7	6	6	6	3	5	7	7	7	3321800000		27.576	27.3979	26.7129	27.1601	27.215	27.1421	27.0343	27.3103	28.3642		tr|A0A0D9QV09|A0A0D9QV09_CHLSB Uncharacterized protein OS=Chlorocebus sabaeus GN=RPS16 PE=3 SV=1;sp|P62249|RS16_HUMAN 40S ribosomal protein S16 OS=Homo sapiens GN=RPS16 PE=1 SV=2;tr|M0R210|M0R210_HUMAN 40S ribosomal protein S16 OS=Homo sapiens GN=RPS16 PE=
1053	A0A0D9R7L4;Q9Y3I0	RTCB	tRNA-splicing ligase RtcB homolog	21	21	51.9	55.2	505	162.35		0.963115	0.285177	0.677938		2.76399	0.434112	1.20296						15	13	14	13	13	12	12	12	15	3305800000		27.7594	27.5718	27.3674	26.6768	26.6524	26.48	27.1031	26.9514	27.7886		tr|A0A0D9R7L4|A0A0D9R7L4_CHLSB tRNA-splicing ligase RtcB homolog OS=Chlorocebus sabaeus GN=RTCB PE=3 SV=1;sp|Q9Y3I0|RTCB_HUMAN tRNA-splicing ligase RtcB homolog OS=Homo sapiens GN=RTCB PE=1 SV=1
303	A0A0D9QWH4;Q15393	SF3B3	Splicing factor 3B subunit 3	29	29	30.9	135.55	1217	137.47		-2.76947	-3.42144	0.651962		1.16826	1.16903	0.300921	+	+	+_+			26	14	12	16	17	14	3	4	1	3305300000		25.3569	NaN	24.5679	27.1551	26.3319	26.5215	26.1451	26.8598	28.9594		tr|A0A0D9QWH4|A0A0D9QWH4_CHLSB Uncharacterized protein OS=Chlorocebus sabaeus GN=SF3B3 PE=4 SV=1;sp|Q15393|SF3B3_HUMAN Splicing factor 3B subunit 3 OS=Homo sapiens GN=SF3B3 PE=1 SV=4
3356	A0A0D9SAC9;P62857	RPS28	40S ribosomal protein S28	6	6	57.4	7.6848	68	92.837		1.66319	1.19286	0.470332		1.83427	0.929627	0.447022	+					6	6	6	6	6	6	6	6	6	3304900000		28.6206	28.7616	27.5007	26.6331	26.5192	26.741	26.6012	26.7081	27.9951		tr|A0A0D9SAC9|A0A0D9SAC9_CHLSB Uncharacterized protein OS=Chlorocebus sabaeus GN=RPS28 PE=4 SV=1;sp|P62857|RS28_HUMAN 40S ribosomal protein S28 OS=Homo sapiens GN=RPS28 PE=1 SV=1
2254	A0A0D9S9T8;A0A0D9RRK9;P62308;A8MWD9;Q49AN9;F5H013;C9JVQ0	SNRPG;SNRPGP15	Small nuclear ribonucleoprotein G;Putative small nuclear ribonucleoprotein G-like protein 15	4	4	35.5	8.4839	76	6.1033		-3.85632	-4.35297	0.496647		2.55762	3.41402	0.306327	+	+	+_+			3	4	4	3	3	2	0	0	0	3300000000		NaN	NaN	NaN	25.8234	27.4666	27.5305	27.1897	26.9888	28.132		tr|A0A0D9S9T8|A0A0D9S9T8_CHLSB Uncharacterized protein OS=Chlorocebus sabaeus GN=SNRPG PE=4 SV=1;tr|A0A0D9RRK9|A0A0D9RRK9_CHLSB Uncharacterized protein OS=Chlorocebus sabaeus PE=4 SV=1;sp|P62308|RUXG_HUMAN Small nuclear ribonucleoprotein G OS=Homo sapiens
2913	A0A0D9S2F4	KRT9	Uncharacterized protein	33	2	41.4	63.447	633	29.756		1.22227	-2.51159	3.73385		0.153186	0.536667	0.775973						2	2	2	1	2	1	2	2	1	3294000000		28.4972	NaN	NaN	NaN	NaN	27.4843	27.3311	27.3483	26.1884		tr|A0A0D9S2F4|A0A0D9S2F4_CHLSB Uncharacterized protein OS=Chlorocebus sabaeus GN=KRT9 PE=3 SV=1
3671	H3BLZ8;Q92841;A0A0D9R2U6;Q92841-1;Q92841-3;Q92841-2	DDX17	Probable ATP-dependent RNA helicase DDX17	26	16	40.1	80.439	731	151.94		0.612642	-0.796661	1.4093		0.890755	0.324961	0.667183						16	12	13	8	9	11	10	9	7	3276700000		26.6388	26.7723	25.765	25.8823	25.7606	25.6952	26.3522	26.1174	29.0965		tr|H3BLZ8|H3BLZ8_HUMAN Probable ATP-dependent RNA helicase DDX17 OS=Homo sapiens GN=DDX17 PE=1 SV=1;sp|Q92841|DDX17_HUMAN Probable ATP-dependent RNA helicase DDX17 OS=Homo sapiens GN=DDX17 PE=1 SV=2;tr|A0A0D9R2U6|A0A0D9R2U6_CHLSB Uncharacterized protein OS
3983	P62241;Q5JR95;A0A0D9S7H2	RPS8	40S ribosomal protein S8	15	15	63.5	24.205	208	80.381		0.353763	-0.754991	1.10875		0.453768	0.363799	0.587949						12	7	6	5	6	9	5	6	5	3269600000		27.018	26.1167	26.8618	26.684	26.0738	26.1774	26.6178	26.5822	29.0615		sp|P62241|RS8_HUMAN 40S ribosomal protein S8 OS=Homo sapiens GN=RPS8 PE=1 SV=2;tr|Q5JR95|Q5JR95_HUMAN 40S ribosomal protein S8 OS=Homo sapiens GN=RPS8 PE=1 SV=1;tr|A0A0D9S7H2|A0A0D9S7H2_CHLSB 40S ribosomal protein S8 OS=Chlorocebus sabaeus GN=RPS8 PE=3 SV=
4179	Q8N2K0;Q8N2K0-2;Q8N2K0-3	ABHD12	Monoacylglycerol lipase ABHD12	14	14	46.5	45.096	398	38.519		-4.35549	-3.98961	-0.365873		3.07518	2.90582	0.68938	+	+	+_+			13	9	9	8	7	12	0	0	0	3250300000		NaN	NaN	NaN	27.3353	27.4878	27.8752	27.3236	27.4321	26.8449		sp|Q8N2K0|ABD12_HUMAN Monoacylglycerol lipase ABHD12 OS=Homo sapiens GN=ABHD12 PE=1 SV=2;sp|Q8N2K0-2|ABD12_HUMAN Isoform 2 of Monoacylglycerol lipase ABHD12 OS=Homo sapiens GN=ABHD12;sp|Q8N2K0-3|ABD12_HUMAN Isoform 3 of Monoacylglycerol lipase ABHD12 OS=Ho
4146	Q6UWP8	SBSN	Suprabasin	13	13	42.4	60.54	590	323.31		2.57999	3.31905	-0.739065		0.770488	0.980185	0.184383						6	5	2	5	5	8	12	9	5	3241900000		27.4608	27.2294	30.7329	27.9612	24.5594	25.1625	23.1595	25.2994	27.0071		sp|Q6UWP8|SBSN_HUMAN Suprabasin OS=Homo sapiens GN=SBSN PE=1 SV=2
2220	A0A0D9RQZ1;P62266;D6RD47;A0A0D9SC62;D6RDJ2;D6RIX0;D6R9I7	RPS23	40S ribosomal protein S23	4	4	28.7	15.807	143	8.3652		-0.0111268	-0.719512	0.708385		0.00677606	0.482514	0.885252						4	3	4	4	4	3	3	2	3	3237400000		27.3197	27.026	25.5892	26.5215	26.7448	26.702	26.8675	27.1464	28.0796		tr|A0A0D9RQZ1|A0A0D9RQZ1_CHLSB Uncharacterized protein OS=Chlorocebus sabaeus GN=RPS23 PE=3 SV=1;sp|P62266|RS23_HUMAN 40S ribosomal protein S23 OS=Homo sapiens GN=RPS23 PE=1 SV=3;tr|D6RD47|D6RD47_HUMAN 40S ribosomal protein S23 OS=Homo sapiens GN=RPS23 PE=
3448	A0A0D9SDY5;P35268;K7EMH1;K7ERI7;K7ELC4;A0A0D9S8T4	RPL22	60S ribosomal protein L22	6	6	50.8	14.759	128	63.513		-0.655022	-1.38007	0.725051		2.85953	1.23896	0.618849						5	4	5	4	5	3	3	4	3	3231900000		26.1317	26.1668	26.0316	26.6473	26.8964	26.7514	26.8709	27.0728	28.5266		tr|A0A0D9SDY5|A0A0D9SDY5_CHLSB Uncharacterized protein OS=Chlorocebus sabaeus PE=4 SV=1;sp|P35268|RL22_HUMAN 60S ribosomal protein L22 OS=Homo sapiens GN=RPL22 PE=1 SV=2;tr|K7EMH1|K7EMH1_HUMAN 60S ribosomal protein L22 (Fragment) OS=Homo sapiens GN=RPL22 P
3140	A0A0D9S6E6;Q13263;Q13263-2;M0R0K9	TRIM28	Transcription intermediary factor 1-beta	23	23	43.5	88.586	834	102.63		0.151339	-0.0213903	0.172729		0.332392	0.0339193	0.402197						16	17	17	14	11	17	7	4	5	3218100000		26.8804	26.9009	27.3528	27.0281	26.9699	26.682	27.0821	26.8037	27.3125		tr|A0A0D9S6E6|A0A0D9S6E6_CHLSB Uncharacterized protein OS=Chlorocebus sabaeus GN=TRIM28 PE=4 SV=1;sp|Q13263|TIF1B_HUMAN Transcription intermediary factor 1-beta OS=Homo sapiens GN=TRIM28 PE=1 SV=5;sp|Q13263-2|TIF1B_HUMAN Isoform 2 of Transcription intermed
1621	A0A0D9RGN2;Q9Y4R8	TELO2	Telomere length regulation protein TEL2 homolog	18	18	26.6	91.622	837	130.82		-3.35636	-3.11351	-0.242852		1.66901	1.56877	0.814837	+	+	+_+			14	17	16	13	15	17	1	1	2	3205600000		NaN	25.3634	NaN	27.4883	27.5803	27.22	27.0152	27.2719	27.273		tr|A0A0D9RGN2|A0A0D9RGN2_CHLSB Uncharacterized protein OS=Chlorocebus sabaeus GN=TELO2 PE=4 SV=1;sp|Q9Y4R8|TELO2_HUMAN Telomere length regulation protein TEL2 homolog OS=Homo sapiens GN=TELO2 PE=1 SV=2
1024	A0A0D9R769;P09601;B1AHA8	HMOX1	Heme oxygenase 1	12	12	55.9	32.873	288	95.357		-4.83542	-4.47611	-0.359313		3.87356	3.35026	0.272594	+	+	+_+			8	10	10	8	10	10	1	1	1	3189800000		NaN	NaN	NaN	26.7593	27.8255	27.621	27.3387	27.5667	26.2225		tr|A0A0D9R769|A0A0D9R769_CHLSB Uncharacterized protein OS=Chlorocebus sabaeus GN=HMOX1 PE=4 SV=1;sp|P09601|HMOX1_HUMAN Heme oxygenase 1 OS=Homo sapiens GN=HMOX1 PE=1 SV=1;tr|B1AHA8|B1AHA8_HUMAN Heme oxygenase 1 (Fragment) OS=Homo sapiens GN=HMOX1 PE=1 SV=1
3038	A0A0D9S4M6;P07237;H7BZ94	P4HB	Protein disulfide-isomerase	20	20	44.9	57.281	510	100.1		0.372583	0.26112	0.111462		0.605968	0.452084	0.208153						15	16	16	17	16	17	14	12	10	3187800000		27.7665	27.0257	27.272	27.3194	26.8277	26.7993	27.3203	26.9109	27.0497		tr|A0A0D9S4M6|A0A0D9S4M6_CHLSB Protein disulfide-isomerase OS=Chlorocebus sabaeus GN=P4HB PE=3 SV=1;sp|P07237|PDIA1_HUMAN Protein disulfide-isomerase OS=Homo sapiens GN=P4HB PE=1 SV=3;tr|H7BZ94|H7BZ94_HUMAN Protein disulfide-isomerase OS=Homo sapiens GN=P4
1235	A0A0D9RAM9;Q9UBM7	DHCR7	7-dehydrocholesterol reductase	8	8	18.5	54.398	475	16.95		-3.39803	-3.62839	0.23036		1.88139	2.04896	0.173353	+	+	+_+			7	7	5	7	6	7	2	1	1	3187300000		NaN	NaN	25.1041	27.8329	27.0993	26.4707	27.6407	27.7142	26.739		tr|A0A0D9RAM9|A0A0D9RAM9_CHLSB Uncharacterized protein OS=Chlorocebus sabaeus GN=DHCR7 PE=4 SV=1;sp|Q9UBM7|DHCR7_HUMAN 7-dehydrocholesterol reductase OS=Homo sapiens GN=DHCR7 PE=1 SV=1
252	A0A0D9QVN1;P20340-2;P20340;P20340-4;A0A0D9RE92;Q9NRW1	RAB6A;RAB6B	Ras-related protein Rab-6A;Ras-related protein Rab-6B	8	8	43.3	23.562	208	36.892		-2.35019	-2.07253	-0.277664		0.822541	0.713248	1.09154						7	7	6	8	7	7	2	0	3	3182100000		NaN	26.0009	26.4257	27.3172	27.2551	27.1664	26.8113	27.1837	26.9108		tr|A0A0D9QVN1|A0A0D9QVN1_CHLSB Uncharacterized protein OS=Chlorocebus sabaeus PE=4 SV=1;sp|P20340-2|RAB6A_HUMAN Isoform 2 of Ras-related protein Rab-6A OS=Homo sapiens GN=RAB6A;sp|P20340|RAB6A_HUMAN Ras-related protein Rab-6A OS=Homo sapiens GN=RAB6A PE=1
3898	P31944	CASP14	Caspase-14;Caspase-14 subunit p17, mature form;Caspase-14 subunit p10, mature form;Caspase-14 subunit p20, intermediate form;Caspase-14 subunit p8, intermediate form	18	18	62	27.679	242	188.54		1.55881	2.38953	-0.830718		0.762736	1.2363	0.474359						11	7	8	10	10	12	15	15	10	3179800000		28.65	27.1863	29.7847	28.0874	26.2334	26.6238	25.4975	25.8032	27.1518		sp|P31944|CASPE_HUMAN Caspase-14 OS=Homo sapiens GN=CASP14 PE=1 SV=2
1549	A0A0D9RFP2;Q969V3-2;Q969V3;K7EMW4;K7ELZ9;A0A0C4DGP7;K7ENM2	NCLN	Nicalin	16	16	33.6	63.017	563	40.907		-5.37468	-5.43529	0.0606117		5.45712	4.65504	0.0937058	+	+	+_+			9	15	14	15	13	12	0	0	0	3168100000		NaN	NaN	NaN	27.108	27.4071	27.3813	27.4268	27.6851	26.9664		tr|A0A0D9RFP2|A0A0D9RFP2_CHLSB Nicalin OS=Chlorocebus sabaeus GN=NCLN PE=3 SV=1;sp|Q969V3-2|NCLN_HUMAN Isoform 2 of Nicalin OS=Homo sapiens GN=NCLN;sp|Q969V3|NCLN_HUMAN Nicalin OS=Homo sapiens GN=NCLN PE=1 SV=2;tr|K7EMW4|K7EMW4_HUMAN Nicalin OS=Homo sapien
3845	P13797;A0A0A0MSQ0;P13797-2;P13797-3;A0A0D9S094	PLS3	Plastin-3	23	23	51.4	70.81	630	295.21		2.09646	1.81752	0.27894		2.97319	2.52361	0.483299	+	+	+_+			15	12	15	11	11	11	21	18	19	3166800000		28.7191	28.4643	29.1414	26.9703	26.5863	26.4789	27.3139	26.6153	26.9431		sp|P13797|PLST_HUMAN Plastin-3 OS=Homo sapiens GN=PLS3 PE=1 SV=4;tr|A0A0A0MSQ0|A0A0A0MSQ0_HUMAN Plastin-3 OS=Homo sapiens GN=PLS3 PE=1 SV=1;sp|P13797-2|PLST_HUMAN Isoform 2 of Plastin-3 OS=Homo sapiens GN=PLS3;sp|P13797-3|PLST_HUMAN Isoform 3 of Plastin-3
4323	Q9UI26;Q9UI26-2;F8WDV0	IPO11	Importin-11	23	12	33.4	112.53	975	279.96		-5.04	-4.22165	-0.818355		3.35016	3.15843	0.808464	+	+	+_+			6	8	8	11	10	10	0	0	0	3158400000		NaN	NaN	NaN	26.9479	27.8834	28.087	27.0243	27.2272	26.2118		sp|Q9UI26|IPO11_HUMAN Importin-11 OS=Homo sapiens GN=IPO11 PE=1 SV=1;sp|Q9UI26-2|IPO11_HUMAN Isoform 2 of Importin-11 OS=Homo sapiens GN=IPO11;tr|F8WDV0|F8WDV0_HUMAN Importin-11 OS=Homo sapiens GN=IPO11 PE=1 SV=1
3462	H0YHA7;A0A0D9SEF0;J3QQ67;Q07020-2;Q07020;G3V203;A0A0D9S9F8;F8VUA6;F8VYV2;A0A075B7A0	RPL18	60S ribosomal protein L18	10	10	47.9	18.863	167	30.721		-0.138919	-1.15625	1.01733		0.160076	0.777706	0.693448						9	7	6	6	6	6	5	6	5	3126700000		26.6603	26.2895	25.7833	26.0668	26.7637	26.3194	26.9007	26.6369	28.6643		tr|H0YHA7|H0YHA7_HUMAN 60S ribosomal protein L18 (Fragment) OS=Homo sapiens GN=RPL18 PE=1 SV=1;tr|A0A0D9SEF0|A0A0D9SEF0_CHLSB Uncharacterized protein OS=Chlorocebus sabaeus PE=4 SV=1;tr|J3QQ67|J3QQ67_HUMAN 60S ribosomal protein L18 (Fragment) OS=Homo sapie
3856	R4GNH3;P17980;E9PM69;E9PKD5;A0A0D9R0F0;E9PMD8;E9PN50	PSMC3	26S protease regulatory subunit 6A	19	19	53.9	47.352	423	159.59		-1.81162	-1.33189	-0.479731		2.05089	1.389	0.813534	+					15	14	16	16	14	16	2	4	4	3118000000		26.2648	25.5014	25.0003	27.2185	27.5541	27.4288	27.0741	27.2649	26.4233		tr|R4GNH3|R4GNH3_HUMAN 26S protease regulatory subunit 6A OS=Homo sapiens GN=PSMC3 PE=1 SV=1;sp|P17980|PRS6A_HUMAN 26S protease regulatory subunit 6A OS=Homo sapiens GN=PSMC3 PE=1 SV=3;tr|E9PM69|E9PM69_HUMAN 26S protease regulatory subunit 6A OS=Homo sapie
411	F5H442;A0A0D9QYD5;Q99816;Q99816-2	TSG101	Tumor susceptibility gene 101 protein	14	14	32.6	40.917	365	41.664		0.111708	0.411451	-0.299744		0.238465	1.53832	0.834073						11	9	9	9	13	10	11	11	11	3112200000		27.1869	27.5414	27.4121	27.5371	27.2595	27.0086	27.0353	26.8347	27.036		tr|F5H442|F5H442_HUMAN Tumor susceptibility gene 101 protein OS=Homo sapiens GN=TSG101 PE=1 SV=1;tr|A0A0D9QYD5|A0A0D9QYD5_CHLSB Uncharacterized protein OS=Chlorocebus sabaeus GN=TSG101 PE=4 SV=1;sp|Q99816|TS101_HUMAN Tumor susceptibility gene 101 protein O
1794	A0A0D9RJB0;O00461;F8W785	GOLIM4	Golgi integral membrane protein 4	14	14	25.5	82.47	701	60.869		-4.26179	-4.10546	-0.156336		4.50976	3.8043	0.223896	+	+	+_+			9	10	12	12	12	12	1	0	1	3100000000		NaN	NaN	NaN	27.3895	27.5936	27.182	27.574	27.366	26.7559		tr|A0A0D9RJB0|A0A0D9RJB0_CHLSB Uncharacterized protein OS=Chlorocebus sabaeus GN=GOLIM4 PE=4 SV=1;sp|O00461|GOLI4_HUMAN Golgi integral membrane protein 4 OS=Homo sapiens GN=GOLIM4 PE=1 SV=1;tr|F8W785|F8W785_HUMAN Golgi integral membrane protein 4 OS=Homo s
2952	A0A0D9S360;O43242;O43242-2	PSMD3	26S proteasome non-ATPase regulatory subunit 3	22	22	47.6	60.995	534	109.72		-1.91771	-1.71936	-0.198351		2.2883	1.91705	0.374757	+	+	+_+			14	18	17	14	17	17	5	7	6	3090800000		26.0317	25.4025	24.8688	27.5078	27.3035	27.2448	27.0391	27.5557	26.8662		tr|A0A0D9S360|A0A0D9S360_CHLSB Uncharacterized protein OS=Chlorocebus sabaeus GN=PSMD3 PE=4 SV=1;sp|O43242|PSMD3_HUMAN 26S proteasome non-ATPase regulatory subunit 3 OS=Homo sapiens GN=PSMD3 PE=1 SV=2;sp|O43242-2|PSMD3_HUMAN Isoform 2 of 26S proteasome non
467	A0A0D9QZ65;Q14318-2;Q14318;M0R2K9;U3KQ64	FKBP8	Peptidyl-prolyl cis-trans isomerase FKBP8;Peptidyl-prolyl cis-trans isomerase	11	11	37	44.676	413	104.17		-1.48059	-1.68072	0.200125		3.7131	2.94967	0.420228	+	+	+_+			7	9	8	7	9	10	4	2	2	3086400000		25.3934	25.5168	25.6611	27.1325	27.0286	26.852	27.534	26.8912	27.1883		tr|A0A0D9QZ65|A0A0D9QZ65_CHLSB Peptidylprolyl isomerase OS=Chlorocebus sabaeus GN=FKBP8 PE=4 SV=1;sp|Q14318-2|FKBP8_HUMAN Isoform 2 of Peptidyl-prolyl cis-trans isomerase FKBP8 OS=Homo sapiens GN=FKBP8;sp|Q14318|FKBP8_HUMAN Peptidyl-prolyl cis-trans isomer
993	A0A0D9R6N8;P63244;J3KPE3;H0Y8W2;H0YAF8;H0YAM7;D6R9Z1;D6RAC2;D6R9L0;D6RFX4;D6RHH4;D6REE5	GNB2L1	Guanine nucleotide-binding protein subunit beta-2-like 1;Guanine nucleotide-binding protein subunit beta-2-like 1, N-terminally processed	18	18	50	42.822	394	323.31		0.376574	-0.363768	0.740342		1.02151	0.205055	0.46052						16	15	13	7	9	12	5	6	6	3084700000		26.9761	26.6834	26.7066	26.6877	26.3546	26.1941	26.3124	26.6488	28.4962		tr|A0A0D9R6N8|A0A0D9R6N8_CHLSB Uncharacterized protein OS=Chlorocebus sabaeus GN=RACK1 PE=4 SV=1;sp|P63244|RACK1_HUMAN Receptor of activated protein C kinase 1 OS=Homo sapiens GN=RACK1 PE=1 SV=3;tr|J3KPE3|J3KPE3_HUMAN Receptor of-activated protein C kinase
453	A0A0D9QYY6;M0QXB4;O14579;O14579-2;M0R061;O14579-3	COPE	Coatomer subunit epsilon	13	13	50.6	34.469	308	126.39		-5.15107	-4.98263	-0.168443		4.78938	4.52956	0.429891	+	+	+_+			12	12	11	12	13	12	0	0	0	3077400000		NaN	NaN	NaN	27.5156	27.2014	27.367	27.4286	27.2085	26.9414		tr|A0A0D9QYY6|A0A0D9QYY6_CHLSB Uncharacterized protein OS=Chlorocebus sabaeus GN=COPE PE=4 SV=1;tr|M0QXB4|M0QXB4_HUMAN Coatomer protein complex, subunit epsilon, isoform CRA_g OS=Homo sapiens GN=COPE PE=1 SV=1;sp|O14579|COPE_HUMAN Coatomer subunit epsilon
2219	A0A0D9RQY7;P25789;H0YN18;H0YMZ1;H0YL69;H0YMA1;P25789-2;H0YKT8;H0YMI6	PSMA4	Proteasome subunit alpha type-4;Proteasome subunit alpha type;Proteasome subunit beta type	11	11	49	29.483	261	30.059		-0.262646	-0.326643	0.0639966		0.32132	0.527277	0.115502						4	8	8	8	8	9	6	6	6	3076300000		26.9515	26.2404	27.1239	27.3873	26.7013	27.0151	27.0312	27.1484	27.1162		tr|A0A0D9RQY7|A0A0D9RQY7_CHLSB Proteasome subunit alpha type OS=Chlorocebus sabaeus GN=PSMA4 PE=3 SV=1;sp|P25789|PSA4_HUMAN Proteasome subunit alpha type-4 OS=Homo sapiens GN=PSMA4 PE=1 SV=1;tr|H0YN18|H0YN18_HUMAN Proteasome subunit alpha type-4 OS=Homo sa
749	A0A0D9R354;F5GZS6;J3KPF3;P08195-3;P08195;P08195-4	SLC3A2	4F2 cell-surface antigen heavy chain	19	8	39.7	67.03	622	286.43		-1.61414	-2.03274	0.418605		3.23761	2.92178	0.820689	+	+	+_+			6	8	7	6	6	7	4	3	2	3074400000		25.1257	25.3156	25.5619	27.0748	27.0253	26.7455	27.63	27.5257	26.9457		tr|A0A0D9R354|A0A0D9R354_CHLSB Uncharacterized protein OS=Chlorocebus sabaeus GN=SLC3A2 PE=4 SV=1;tr|F5GZS6|F5GZS6_HUMAN 4F2 cell-surface antigen heavy chain OS=Homo sapiens GN=SLC3A2 PE=1 SV=1;tr|J3KPF3|J3KPF3_HUMAN 4F2 cell-surface antigen heavy chain OS
103	A0A0D9RR51;A0A087X2I1;P62333	PSMC6	26S protease regulatory subunit 10B	13	13	41.9	45.796	403	76.852		-1.24785	-0.999715	-0.248139		1.46559	1.04377	0.330062						11	13	12	12	12	13	5	7	3	3053100000		26.6366	25.3892	25.89	26.9781	27.1662	27.5149	27.1601	27.3094	26.4454		tr|A0A0D9RR51|A0A0D9RR51_CHLSB Uncharacterized protein OS=Chlorocebus sabaeus GN=PSMC6 PE=3 SV=1;tr|A0A087X2I1|A0A087X2I1_HUMAN 26S protease regulatory subunit 10B OS=Homo sapiens GN=PSMC6 PE=1 SV=1;sp|P62333|PRS10_HUMAN 26S protease regulatory subunit 10B
565	A0A0D9R0F4;P61006;P61006-2	RAB8A	Ras-related protein Rab-8A	9	6	42	23.668	207	126.47		-2.04792	-1.31963	-0.728294		0.628254	0.390756	0.93664						6	6	6	5	6	6	2	1	2	3049500000		NaN	25.5905	27.4871	26.6267	27.8646	27.3281	26.6645	26.4629	26.5071		tr|A0A0D9R0F4|A0A0D9R0F4_CHLSB Uncharacterized protein OS=Chlorocebus sabaeus GN=RAB8A PE=4 SV=1;sp|P61006|RAB8A_HUMAN Ras-related protein Rab-8A OS=Homo sapiens GN=RAB8A PE=1 SV=1;sp|P61006-2|RAB8A_HUMAN Isoform 2 of Ras-related protein Rab-8A OS=Homo sap
2152	A0A0D9RPV4	NDUFAF4	Uncharacterized protein	9	9	57.7	20.138	175	103.17		-2.73242	-2.56978	-0.16264		1.42679	1.34184	0.632285	+	+	+_+			7	7	8	8	8	8	2	1	3	3047600000		NaN	25.8389	24.9658	27.2079	27.3799	27.2569	26.9484	27.3073	27.1011		tr|A0A0D9RPV4|A0A0D9RPV4_CHLSB Uncharacterized protein OS=Chlorocebus sabaeus GN=NDUFAF4 PE=4 SV=1
3272	A0A0D9S8A9;P60953;P60953-1;Q5JYX0	CDC42	Cell division control protein 42 homolog	8	7	42.9	21.258	191	22.603		-0.298477	-0.302041	0.00356483		0.255105	0.315357	0.00272511						5	6	6	6	5	6	5	5	6	3024300000		27.0306	26.0828	26.9659	26.3131	27.1802	27.4814	27.4648	26.8815	26.6391		tr|A0A0D9S8A9|A0A0D9S8A9_CHLSB Uncharacterized protein OS=Chlorocebus sabaeus GN=CDC42 PE=4 SV=1;sp|P60953|CDC42_HUMAN Cell division control protein 42 homolog OS=Homo sapiens GN=CDC42 PE=1 SV=2;sp|P60953-1|CDC42_HUMAN Isoform 1 of Cell division control pr
3813	P05109	S100A8	Protein S100-A8;Protein S100-A8, N-terminally processed	13	13	77.4	10.834	93	40.982		2.82672	1.00253	1.8242		0.5737	0.181477	0.382476						10	5	8	4	2	10	9	7	4	3018900000		26.8035	24.4883	30.0528	27.1743	23.4491	22.2412	26.0184	23.8252	28.4935		sp|P05109|S10A8_HUMAN Protein S100-A8 OS=Homo sapiens GN=S100A8 PE=1 SV=1
2590	A0A0D9RWZ9;P57088;D6RAA6	TMEM33	Transmembrane protein 33	9	9	30.4	27.978	247	16.777		-3.67665	-3.72937	0.0527242		4.82025	3.55227	0.0652496	+	+	+_+			4	6	5	7	7	7	2	2	2	3014500000		NaN	NaN	NaN	27.003	27.0705	27.1474	27.381	27.4277	26.5704		tr|A0A0D9RWZ9|A0A0D9RWZ9_CHLSB Uncharacterized protein OS=Chlorocebus sabaeus GN=TMEM33 PE=4 SV=1;sp|P57088|TMM33_HUMAN Transmembrane protein 33 OS=Homo sapiens GN=TMEM33 PE=1 SV=2;tr|D6RAA6|D6RAA6_HUMAN Transmembrane protein 33 (Fragment) OS=Homo sapiens
1917	A0A0D9RL55	MYBBP1A	Uncharacterized protein	35	18	32.8	148.81	1328	323.31		-4.12793	-4.40708	0.279149		3.06166	3.64336	0.234899	+	+	+_+			15	12	13	12	13	10	1	0	0	3011400000		NaN	NaN	NaN	26.2656	27.2056	27.5901	26.9472	27.1644	27.7872		tr|A0A0D9RL55|A0A0D9RL55_CHLSB Uncharacterized protein OS=Chlorocebus sabaeus GN=MYBBP1A PE=4 SV=1
25	A0A087WTT1;A0A0D9RHW7;P11940-2;P11940;E7EQV3;E7ERJ7;Q9H361;H0YAR2	PABPC1;PABPC3	Polyadenylate-binding protein;Polyadenylate-binding protein 1;Polyadenylate-binding protein 3	23	15	46.7	58.535	522	230.33		0.327459	-0.270201	0.597661		0.977986	0.156054	0.388799						14	11	11	13	14	12	5	5	6	3010800000		26.9571	26.9173	26.6046	26.7081	26.4556	26.333	26.4368	26.4796	28.3732		tr|A0A087WTT1|A0A087WTT1_HUMAN Polyadenylate-binding protein OS=Homo sapiens GN=PABPC1 PE=1 SV=1;tr|A0A0D9RHW7|A0A0D9RHW7_CHLSB Polyadenylate-binding protein OS=Chlorocebus sabaeus GN=PABPC1 PE=3 SV=1;sp|P11940-2|PABP1_HUMAN Isoform 2 of Polyadenylate-bind
135	A0A0A0MTH9;O14981	BTAF1	TATA-binding protein-associated factor 172	54	10	35.3	206.93	1849	223.2		-4.63547	-4.26398	-0.371487		3.7994	3.03822	0.444742	+	+	+_+			8	9	9	9	8	10	0	0	0	3000500000		NaN	NaN	NaN	27.3848	27.4818	27.2765	27.0023	27.6262	26.4		tr|A0A0A0MTH9|A0A0A0MTH9_HUMAN TATA-binding protein-associated factor 172 OS=Homo sapiens GN=BTAF1 PE=1 SV=1;sp|O14981|BTAF1_HUMAN TATA-binding protein-associated factor 172 OS=Homo sapiens GN=BTAF1 PE=1 SV=2
1951	A0A0D9RLK9;P51970	NDUFA8	NADH dehydrogenase [ubiquinone] 1 alpha subcomplex subunit 8	8	8	58.7	20.038	172	35.014		-4.9949	-5.1951	0.200202		4.52469	3.72073	0.228843	+	+	+_+			6	7	7	7	7	7	2	2	2	2999800000		NaN	NaN	NaN	27.1833	26.9012	27.1977	27.5568	27.6851	26.6409		tr|A0A0D9RLK9|A0A0D9RLK9_CHLSB NADH dehydrogenase [ubiquinone] 1 alpha subcomplex subunit 8 OS=Chlorocebus sabaeus GN=NDUFA8 PE=3 SV=1;sp|P51970|NDUA8_HUMAN NADH dehydrogenase [ubiquinone] 1 alpha subcomplex subunit 8 OS=Homo sapiens GN=NDUFA8 PE=1 SV=3
3062	A0A0D9S4Z6;P02545;P02545-6;P02545-3;P48678;GRW001;P02545-5;P02545-4;GRW002	LMNA;Lmna	Prelamin-A/C;Lamin-A/C	64	6	78.9	74.07	663	323.31	22	2.18565	0.0836093	2.10204		1.7066	0.0203931	0.763869	+					6	6	4	4	2	3	3	4	4	2992500000		27.2343	27.294	25.6231	24.3736	24.9147	24.3063	25.3673	25.3968	29.1365		tr|A0A0D9S4Z6|A0A0D9S4Z6_CHLSB Uncharacterized protein OS=Chlorocebus sabaeus GN=LMNA PE=3 SV=1;sp|P02545|LMNA_HUMAN Prelamin-A/C OS=Homo sapiens GN=LMNA PE=1 SV=1;sp|P02545-6|LMNA_HUMAN Isoform 6 of Prelamin-A/C OS=Homo sapiens GN=LMNA;sp|P02545-3|LMNA_HU
4358	Q9Y678;A0A0D9R8Z8	COPG1	Coatomer subunit gamma-1	33	28	51.8	97.717	874	212.18		-4.17453	-4.08538	-0.0891495		4.63003	4.34618	0.238454	+	+	+_+			25	21	22	18	19	24	1	1	1	2990800000		NaN	NaN	NaN	27.3495	27.1683	27.4045	27.4564	27.0143	27.1841		sp|Q9Y678|COPG1_HUMAN Coatomer subunit gamma-1 OS=Homo sapiens GN=COPG1 PE=1 SV=1;tr|A0A0D9R8Z8|A0A0D9R8Z8_CHLSB Coatomer subunit gamma OS=Chlorocebus sabaeus GN=COPG1 PE=3 SV=1
2865	A0A0D9S1Q8;O96008;O96008-2	TOMM40	Mitochondrial import receptor subunit TOM40 homolog	9	9	50.4	37.817	361	54.193		-1.50716	-1.60865	0.101492		3.7679	2.1903	0.127311	+	+	+_+			6	7	7	6	7	8	2	2	2	2980200000		25.4256	25.6562	25.297	27.0176	26.8972	26.9854	27.6457	26.731	26.8281		tr|A0A0D9S1Q8|A0A0D9S1Q8_CHLSB Uncharacterized protein OS=Chlorocebus sabaeus GN=TOMM40 PE=4 SV=1;sp|O96008|TOM40_HUMAN Mitochondrial import receptor subunit TOM40 homolog OS=Homo sapiens GN=TOMM40 PE=1 SV=1;sp|O96008-2|TOM40_HUMAN Isoform 2 of Mitochondri
982	A0A0D9R6H5;H3BN98;I3L3P7;P62244;I3L246	RPS15A	40S ribosomal protein S15a	11	11	32.2	39.7	348	86.826		-0.803164	-1.33672	0.533554		1.85935	2.51883	1.6368						11	10	10	6	8	9	4	3	4	2978500000		26.1849	26.0885	25.6328	26.5992	26.8894	26.8271	27.3403	27.0825	27.4935		tr|A0A0D9R6H5|A0A0D9R6H5_CHLSB Uncharacterized protein OS=Chlorocebus sabaeus PE=3 SV=1;tr|H3BN98|H3BN98_HUMAN Uncharacterized protein (Fragment) OS=Homo sapiens PE=4 SV=2;tr|I3L3P7|I3L3P7_HUMAN 40S ribosomal protein S15a OS=Homo sapiens GN=RPS15A PE=1 SV=
459	A0A0D9QZ04;G3V5T9;P24941;P24941-2;E7ESI2	CDK2	Cyclin-dependent kinase 2	17	16	64.4	33.929	298	44.655		0.793311	0.955241	-0.16193		3.05604	2.49505	0.445905						10	11	10	10	10	12	10	8	11	2974200000		27.7629	27.8861	27.6928	26.8889	27.12	26.9529	26.9571	26.9736	26.5453		tr|A0A0D9QZ04|A0A0D9QZ04_CHLSB Uncharacterized protein OS=Chlorocebus sabaeus GN=CDK2 PE=3 SV=1;tr|G3V5T9|G3V5T9_HUMAN Cyclin-dependent kinase 2 OS=Homo sapiens GN=CDK2 PE=1 SV=1;sp|P24941|CDK2_HUMAN Cyclin-dependent kinase 2 OS=Homo sapiens GN=CDK2 PE=1 S
3379	A0A0D9SB30;A0A0D9RPU0;O00762;O00762-2;O00762-3	UBE2C	Ubiquitin-conjugating enzyme E2 C	12	12	90.5	19.668	179	78.623		-0.7224	-0.368773	-0.353628		1.24966	0.792558	0.929349						9	9	10	9	10	10	5	5	4	2936700000		26.4687	26.8069	26.0801	27.3801	26.8328	27.3099	26.8327	26.8927	26.7365		tr|A0A0D9SB30|A0A0D9SB30_CHLSB Uncharacterized protein OS=Chlorocebus sabaeus PE=3 SV=1;tr|A0A0D9RPU0|A0A0D9RPU0_CHLSB Uncharacterized protein OS=Chlorocebus sabaeus PE=3 SV=1;sp|O00762|UBE2C_HUMAN Ubiquitin-conjugating enzyme E2 C OS=Homo sapiens GN=UBE2C
1749	A0A0D9RIR2;Q8WXD5	GEMIN6	Gem-associated protein 6	5	5	35.9	18.808	167	14.1		-4.85131	-4.56191	-0.2894		3.41425	2.7702	0.268385	+	+	+_+			4	5	5	5	5	5	0	0	0	2930700000		NaN	NaN	NaN	27.2027	27.2837	27.4328	27.4492	27.4368	26.1649		tr|A0A0D9RIR2|A0A0D9RIR2_CHLSB Uncharacterized protein OS=Chlorocebus sabaeus GN=GEMIN6 PE=4 SV=1;sp|Q8WXD5|GEMI6_HUMAN Gem-associated protein 6 OS=Homo sapiens GN=GEMIN6 PE=1 SV=1
3180	A0A0D9S711;Q9UBI6	GNG12	Guanine nucleotide-binding protein G(I)/G(S)/G(O) subunit gamma-12	5	5	76.4	8.0061	72	11.779		-2.60926	-2.36625	-0.243011		1.61324	1.31968	0.198215	+					5	5	5	5	5	5	2	2	1	2929100000		25.2014	NaN	25.3974	26.8332	27.4148	27.3312	26.0797	27.3665	27.4039		tr|A0A0D9S711|A0A0D9S711_CHLSB Guanine nucleotide-binding protein subunit gamma OS=Chlorocebus sabaeus GN=GNG12 PE=3 SV=1;sp|Q9UBI6|GBG12_HUMAN Guanine nucleotide-binding protein G(I)/G(S)/G(O) subunit gamma-12 OS=Homo sapiens GN=GNG12 PE=1 SV=3
1325	A0A0D9RBX0;O15355	PPM1G	Protein phosphatase 1G	17	17	43.6	59.285	546	257.71		-1.06787	-0.534919	-0.532947		3.62716	1.08306	1.09611						11	12	12	12	13	13	6	4	7	2928900000		26.1684	26.3244	26.098	27.2967	27.3367	27.161	27.0637	26.8223	26.3096		tr|A0A0D9RBX0|A0A0D9RBX0_CHLSB Uncharacterized protein OS=Chlorocebus sabaeus GN=PPM1G PE=3 SV=1;sp|O15355|PPM1G_HUMAN Protein phosphatase 1G OS=Homo sapiens GN=PPM1G PE=1 SV=1
587	A0A0D9R0P2	RRP12	Uncharacterized protein	28	8	32	127.1	1146	105.03		-4.91748	-5.26078	0.343306		3.79731	3.95568	1.42363	+	+	+_+			7	8	7	7	7	6	0	0	0	2927300000		NaN	NaN	NaN	26.8854	27.2138	26.9882	27.2621	27.4066	27.4486		tr|A0A0D9R0P2|A0A0D9R0P2_CHLSB Uncharacterized protein OS=Chlorocebus sabaeus GN=RRP12 PE=4 SV=1
3274	B4DKB2;A0A0D9S8B6;P42892-3;P42892-4;P42892;P42892-2	ECE1	Endothelin-converting enzyme 1	15	15	31	83.573	738	137.06		-5.21759	-5.07666	-0.140925		3.81049	3.74356	0.116715	+	+	+_+			11	13	11	13	13	11	1	1	1	2922800000		NaN	NaN	NaN	26.6502	27.3743	27.69	27.6072	27.1574	26.5272		tr|B4DKB2|B4DKB2_HUMAN Endothelin-converting enzyme 1 OS=Homo sapiens GN=ECE1 PE=1 SV=1;tr|A0A0D9S8B6|A0A0D9S8B6_CHLSB Uncharacterized protein OS=Chlorocebus sabaeus GN=ECE1 PE=4 SV=1;sp|P42892-3|ECE1_HUMAN Isoform C of Endothelin-converting enzyme 1 OS=Ho
2689	A0A0D9RYI9;P62314;J3QLI9	SNRPD1	Small nuclear ribonucleoprotein Sm D1	5	5	58.8	13.281	119	75.459		-1.39023	-1.91322	0.522987		1.7908	2.04304	0.616826		+				5	4	4	4	4	4	3	2	2	2920800000		25.6977	25.5385	24.8389	26.2982	26.925	27.0225	27.0973	26.8509	27.8666		tr|A0A0D9RYI9|A0A0D9RYI9_CHLSB Uncharacterized protein OS=Chlorocebus sabaeus GN=SNRPD1 PE=4 SV=1;sp|P62314|SMD1_HUMAN Small nuclear ribonucleoprotein Sm D1 OS=Homo sapiens GN=SNRPD1 PE=1 SV=1;tr|J3QLI9|J3QLI9_HUMAN Small nuclear ribonucleoprotein Sm D1 OS
2636	A0A0D9RXR6;O76071	CIAO1	Probable cytosolic iron-sulfur protein assembly protein CIAO1	12	12	46.9	37.84	339	172.81		-4.39786	-4.46985	0.0719814		3.2453	3.29601	0.0928468	+	+	+_+			10	11	12	6	9	11	1	1	0	2894100000		NaN	NaN	NaN	27.5904	26.9413	27.0371	27.5368	27.3475	26.9005		tr|A0A0D9RXR6|A0A0D9RXR6_CHLSB Probable cytosolic iron-sulfur protein assembly protein CIAO1 OS=Chlorocebus sabaeus GN=CIAO1 PE=3 SV=1;sp|O76071|CIAO1_HUMAN Probable cytosolic iron-sulfur protein assembly protein CIAO1 OS=Homo sapiens GN=CIAO1 PE=1 SV=1
305	A0A0D9QWI4;A0A0A0MS45;J3KNI1;Q9H9E3;Q9H9E3-3	COG4	Conserved oligomeric Golgi complex subunit 4	19	19	27.9	89.589	789	303.82		-3.99345	-3.53549	-0.457963		2.95854	2.28397	0.462576	+	+	+_+			9	16	16	14	16	17	1	1	0	2874900000		NaN	NaN	NaN	27.3208	27.4065	27.3326	27.4273	27.2078	26.0509		tr|A0A0D9QWI4|A0A0D9QWI4_CHLSB Uncharacterized protein OS=Chlorocebus sabaeus GN=COG4 PE=4 SV=1;tr|A0A0A0MS45|A0A0A0MS45_HUMAN Conserved oligomeric Golgi complex subunit 4 OS=Homo sapiens GN=COG4 PE=1 SV=1;tr|J3KNI1|J3KNI1_HUMAN Conserved oligomeric Golgi
141	A0A0A6YYA0;A0A0D9RQR3;Q86XR7-2;Q9Y3B3-2;Q9Y3B3	TMED7-TICAM2;TMED7	Transmembrane emp24 domain-containing protein 7	6	6	39.4	21.233	188	40.964		-3.70596	-3.2781	-0.42786		1.8041	1.56638	0.537101	+	+	+_+			5	6	5	6	5	5	2	1	2	2832000000		NaN	24.3712	24.6731	27.6051	27.2411	27.1277	26.3293	27.4389	26.9222		tr|A0A0A6YYA0|A0A0A6YYA0_HUMAN Protein TMED7-TICAM2 OS=Homo sapiens GN=TMED7-TICAM2 PE=3 SV=1;tr|A0A0D9RQR3|A0A0D9RQR3_CHLSB Uncharacterized protein OS=Chlorocebus sabaeus GN=TMED7 PE=3 SV=1;sp|Q86XR7-2|TCAM2_HUMAN Isoform 2 of TIR domain-containing adapte
398	A0A0D9QY64;Q9UHB9;Q9UHB9-4;Q9UHB9-2	SRP68	Signal recognition particle subunit SRP68	19	19	36.5	70.305	620	99.82		-0.549077	-0.150185	-0.398891		1.88059	0.467422	1.47873						14	15	17	15	12	18	7	8	7	2827000000		26.4784	26.6292	26.2805	27.0693	26.8526	27.1135	26.6746	26.7387	26.4253		tr|A0A0D9QY64|A0A0D9QY64_CHLSB Signal recognition particle subunit SRP68 OS=Chlorocebus sabaeus GN=SRP68 PE=3 SV=1;sp|Q9UHB9|SRP68_HUMAN Signal recognition particle subunit SRP68 OS=Homo sapiens GN=SRP68 PE=1 SV=2;sp|Q9UHB9-4|SRP68_HUMAN Isoform 4 of Signa
1357	A0A0D9RCI1;P55010;H0YLZ1;H0YN40	EIF5	Eukaryotic translation initiation factor 5	18	18	42.9	49.207	431	58.001		-4.14782	-4.19151	0.0436916		3.43464	4.73503	0.0407632	+	+	+_+			13	15	13	13	15	17	2	0	0	2811500000		NaN	NaN	22.8692	27.7595	27.0069	26.573	27.0564	27.3829	27.0311		tr|A0A0D9RCI1|A0A0D9RCI1_CHLSB Uncharacterized protein OS=Chlorocebus sabaeus GN=EIF5 PE=4 SV=1;sp|P55010|IF5_HUMAN Eukaryotic translation initiation factor 5 OS=Homo sapiens GN=EIF5 PE=1 SV=2;tr|H0YLZ1|H0YLZ1_HUMAN Eukaryotic translation initiation factor
3323	A0A0D9S9B4;J3KQ48;Q9Y3E5	PTRH2	Peptidyl-tRNA hydrolase 2, mitochondrial	5	5	47.5	19.232	179	323.31		-2.25521	-1.96679	-0.28842		1.71671	1.66694	0.39538	+	+	+_+			5	5	5	5	5	5	2	2	1	2804600000		25.6639	NaN	25.1526	26.6451	27.2215	27.6193	26.7791	27.1167	26.7248		tr|A0A0D9S9B4|A0A0D9S9B4_CHLSB Uncharacterized protein OS=Chlorocebus sabaeus GN=PTRH2 PE=4 SV=1;tr|J3KQ48|J3KQ48_HUMAN Peptidyl-tRNA hydrolase 2, mitochondrial OS=Homo sapiens GN=PTRH2 PE=1 SV=1;sp|Q9Y3E5|PTH2_HUMAN Peptidyl-tRNA hydrolase 2, mitochondria
308	A0A0D9QWL5;Q8WTW3;A0A087WVI0;E9PBL8	COG1	Conserved oligomeric Golgi complex subunit 1	30	30	41.2	108.97	980	194.86		-5.01897	-4.81525	-0.203726		2.86956	2.64155	0.266271	+	+	+_+			18	23	25	23	25	22	0	1	0	2803900000		NaN	NaN	NaN	27.1447	27.2197	27.356	27.3331	27.3385	26.4376		tr|A0A0D9QWL5|A0A0D9QWL5_CHLSB Uncharacterized protein OS=Chlorocebus sabaeus GN=COG1 PE=4 SV=1;sp|Q8WTW3|COG1_HUMAN Conserved oligomeric Golgi complex subunit 1 OS=Homo sapiens GN=COG1 PE=1 SV=1;tr|A0A087WVI0|A0A087WVI0_HUMAN Conserved oligomeric Golgi co
2946	A0A0D9S319	ZW10	Uncharacterized protein	40	5	57.4	89.064	781	198.23		-4.50029	-4.38057	-0.119722		3.05582	2.92419	0.186218	+	+	+_+			5	5	5	5	5	5	0	0	0	2800300000		NaN	NaN	NaN	26.8231	27.1335	27.2473	27.2168	27.0942	26.5338		tr|A0A0D9S319|A0A0D9S319_CHLSB Uncharacterized protein OS=Chlorocebus sabaeus GN=ZW10 PE=4 SV=1
2871	A0A0D9S1T9;P40763-3;P40763-2;P40763;G8JLH9	STAT3	Signal transducer and activator of transcription 3;Signal transducer and activator of transcription	21	21	35.3	88.067	770	108.19		-2.67746	-2.1855	-0.491963		2.90959	2.40814	0.594105	+	+	+_+			18	18	16	13	15	18	2	3	4	2793000000		24.8287	24.8315	24.1462	27.7523	27.047	27.0395	27.0922	26.2183	27.0525		tr|A0A0D9S1T9|A0A0D9S1T9_CHLSB Signal transducer and activator of transcription OS=Chlorocebus sabaeus GN=STAT3 PE=3 SV=1;sp|P40763-3|STAT3_HUMAN Isoform 3 of Signal transducer and activator of transcription 3 OS=Homo sapiens GN=STAT3;sp|P40763-2|STAT3_HUM
3104	A0A0D9S5N9;P26447	S100A4	Protein S100-A4	3	3	27.7	11.728	101	4.4708		-0.615665	-0.0501442	-0.565521		0.892666	0.0548373	1.9653						2	3	3	3	3	3	2	2	2	2789200000		26.0938	26.1346	27.031	26.9198	26.9535	27.2331	26.466	26.3384	26.6054		tr|A0A0D9S5N9|A0A0D9S5N9_CHLSB Protein S100 OS=Chlorocebus sabaeus GN=S100A4 PE=3 SV=1;sp|P26447|S10A4_HUMAN Protein S100-A4 OS=Homo sapiens GN=S100A4 PE=1 SV=1
4230	Q96BW5-2;Q96BW5;A0A0D9RK17;A0A0A0MSI3	PTER	Phosphotriesterase-related protein	15	15	64.6	33.435	302	141.86		2.36718	2.44493	-0.0777416		3.39936	2.70344	0.105032	+	+	+_+			6	8	9	8	7	7	13	13	13	2788500000		28.3394	29.0207	28.931	26.3755	26.4661	26.3479	26.8028	26.2608	25.8927		sp|Q96BW5-2|PTER_HUMAN Isoform 2 of Phosphotriesterase-related protein OS=Homo sapiens GN=PTER;sp|Q96BW5|PTER_HUMAN Phosphotriesterase-related protein OS=Homo sapiens GN=PTER PE=1 SV=1;tr|A0A0D9RK17|A0A0D9RK17_CHLSB Uncharacterized protein OS=Chlorocebus s
4168	Q86VS8;A0A0D9RR18	HOOK3	Protein Hook homolog 3	22	22	35	83.125	718	82.982		-5.08796	-4.65369	-0.434278		3.10261	2.78311	0.709695	+	+	+_+			15	16	18	18	16	19	0	2	1	2787200000		NaN	NaN	NaN	27.267	27.4639	27.3144	27.1607	27.2129	26.3688		sp|Q86VS8|HOOK3_HUMAN Protein Hook homolog 3 OS=Homo sapiens GN=HOOK3 PE=1 SV=2;tr|A0A0D9RR18|A0A0D9RR18_CHLSB Uncharacterized protein OS=Chlorocebus sabaeus GN=HOOK3 PE=4 SV=1
2335	A0A0D9RSU4;O94903;E5RG77	PROSC	Proline synthase co-transcribed bacterial homolog protein	13	13	44.8	34.032	310	37.827		3.71906	4.15589	-0.436828		1.95646	2.31954	0.306677	+	+	+_+			5	6	5	6	5	5	12	12	12	2787100000		29.2498	30.2641	27.9549	24.4591	26.0584	25.7941	25.5906	24.8252	24.5853		tr|A0A0D9RSU4|A0A0D9RSU4_CHLSB Uncharacterized protein OS=Chlorocebus sabaeus GN=PROSC PE=3 SV=1;sp|O94903|PROSC_HUMAN Proline synthase co-transcribed bacterial homolog protein OS=Homo sapiens GN=PROSC PE=1 SV=1;tr|E5RG77|E5RG77_HUMAN Proline synthase co-t
1947	A0A0D9RLJ0;P27105	STOM	Erythrocyte band 7 integral membrane protein	11	11	47.9	31.615	288	65.298		-4.66275	-4.27851	-0.384235		3.20224	3.08386	0.525214	+	+	+_+			7	8	8	9	8	9	0	0	0	2782400000		NaN	NaN	NaN	26.8768	27.6396	27.5045	27.2297	27.1171	26.5213		tr|A0A0D9RLJ0|A0A0D9RLJ0_CHLSB Uncharacterized protein OS=Chlorocebus sabaeus GN=STOM PE=4 SV=1;sp|P27105|STOM_HUMAN Erythrocyte band 7 integral membrane protein OS=Homo sapiens GN=STOM PE=1 SV=3
3338	A0A0D9S9T1;P62745	RHOB	Rho-related GTP-binding protein RhoB	9	7	49	22.123	196	33.402		-3.59186	-3.51544	-0.0764173		1.37435	1.34398	0.166949	+	+	+_+			6	6	5	7	7	6	2	1	1	2781900000		NaN	NaN	25.9591	27.2662	27.1856	26.9168	27.2643	27.0802	26.795		tr|A0A0D9S9T1|A0A0D9S9T1_CHLSB Uncharacterized protein OS=Chlorocebus sabaeus GN=RHOB PE=4 SV=1;sp|P62745|RHOB_HUMAN Rho-related GTP-binding protein RhoB OS=Homo sapiens GN=RHOB PE=1 SV=1
3997	P63241;I3L397;I3L504;A0A0D9RHD1;P63241-2;Q6IS14;F8WCJ1;C9J7B5;C9J4W5;A0A0D9RJW0;Q9GZV4	EIF5A;EIF5AL1;EIF5A2	Eukaryotic translation initiation factor 5A-1;Eukaryotic translation initiation factor 5A;Eukaryotic translation initiation factor 5A-1-like;Eukaryotic translation initiation factor 5A-2	8	8	85.1	16.832	154	89.076		1.49013	1.09728	0.392856		1.57204	2.29064	0.366391						6	6	5	5	7	6	8	7	6	2781500000		28.1181	27.9797	28.3832	27.5085	26.2757	26.2265	26.9207	26.8902	27.3783		sp|P63241|IF5A1_HUMAN Eukaryotic translation initiation factor 5A-1 OS=Homo sapiens GN=EIF5A PE=1 SV=2;tr|I3L397|I3L397_HUMAN Eukaryotic translation initiation factor 5A (Fragment) OS=Homo sapiens GN=EIF5A PE=1 SV=8;tr|I3L504|I3L504_HUMAN Eukaryotic transl
2708	A0A0D9RYV2;Q96JB2	COG3	Conserved oligomeric Golgi complex subunit 3	24	24	43.2	94.088	828	233.81		-5.13672	-4.86117	-0.275541		3.86578	3.63203	0.363712	+	+	+_+			17	22	22	21	21	23	0	1	0	2777500000		NaN	NaN	NaN	26.8797	27.4494	27.4876	27.2322	27.2565	26.5014		tr|A0A0D9RYV2|A0A0D9RYV2_CHLSB Uncharacterized protein OS=Chlorocebus sabaeus GN=COG3 PE=4 SV=1;sp|Q96JB2|COG3_HUMAN Conserved oligomeric Golgi complex subunit 3 OS=Homo sapiens GN=COG3 PE=1 SV=3
270	A0A0D9QVY1;O00232;O00232-2	PSMD12	26S proteasome non-ATPase regulatory subunit 12	18	18	40.8	52.904	456	141.96		-2.16347	-1.88818	-0.275293		3.3368	2.81403	0.567195	+	+	+_+			13	14	13	13	13	15	2	4	3	2772500000		25.2938	25.0715	24.7194	27.2687	26.9574	27.3492	26.841	27.2583	26.6501		tr|A0A0D9QVY1|A0A0D9QVY1_CHLSB Uncharacterized protein OS=Chlorocebus sabaeus GN=PSMD12 PE=4 SV=1;sp|O00232|PSD12_HUMAN 26S proteasome non-ATPase regulatory subunit 12 OS=Homo sapiens GN=PSMD12 PE=1 SV=3;sp|O00232-2|PSD12_HUMAN Isoform 2 of 26S proteasome
3738	O15270;H0YJV2	SPTLC2	Serine palmitoyltransferase 2	25	10	49.3	62.924	562	323.31		-4.29992	-3.90255	-0.397376		3.71004	2.95096	0.319337	+	+	+_+			8	9	8	7	8	9	0	1	0	2758100000		NaN	NaN	NaN	26.6796	27.4832	27.5158	27.3587	27.1515	25.9763		sp|O15270|SPTC2_HUMAN Serine palmitoyltransferase 2 OS=Homo sapiens GN=SPTLC2 PE=1 SV=1;tr|H0YJV2|H0YJV2_HUMAN Serine palmitoyltransferase 2 (Fragment) OS=Homo sapiens GN=SPTLC2 PE=1 SV=1
1122	A0A0D9R8L7;P61026	RAB10	Ras-related protein Rab-10	12	9	46.5	22.541	200	90.418		-1.00374	-0.476736	-0.527008		1.27421	0.509876	0.962346						8	6	8	7	7	8	4	4	3	2757500000		26.4413	25.6006	26.758	27.5275	27.1893	27.0943	26.3087	26.8992	27.0221		tr|A0A0D9R8L7|A0A0D9R8L7_CHLSB Uncharacterized protein OS=Chlorocebus sabaeus GN=RAB10 PE=4 SV=1;sp|P61026|RAB10_HUMAN Ras-related protein Rab-10 OS=Homo sapiens GN=RAB10 PE=1 SV=1
4078	Q15370;Q15370-2;B8ZZU8;A0A0D9SCZ5;A0A0D9RDB5;A0A0B4J296;I3L0M9	TCEB2	Transcription elongation factor B polypeptide 2	8	8	65.3	13.133	118	25.012		0.0363871	0.412897	-0.37651		0.115956	1.37322	1.14714						5	5	6	5	5	6	6	7	6	2753800000		27.3447	27.1916	27.1183	27.0182	27.3385	27.1888	26.7781	27.0316	26.6062		sp|Q15370|ELOB_HUMAN Transcription elongation factor B polypeptide 2 OS=Homo sapiens GN=TCEB2 PE=1 SV=1;sp|Q15370-2|ELOB_HUMAN Isoform 2 of Transcription elongation factor B polypeptide 2 OS=Homo sapiens GN=TCEB2;tr|B8ZZU8|B8ZZU8_HUMAN Transcription elonga
3597	E7ES33;E7EPK1;Q16181-2;Q16181;G3V1Q4;A0A0D9RR11	SEPT7	Septin-7	18	17	44.6	48.715	417	206.5		-3.13207	-2.52331	-0.608756		1.33933	1.04075	0.833703	+					9	12	13	14	13	16	6	4	3	2753000000		24.5258	NaN	25.8917	27.4652	27.1721	27.3347	26.6034	27.3307	26.2116		tr|E7ES33|E7ES33_HUMAN Septin-7 OS=Homo sapiens GN=SEPT7 PE=1 SV=3;tr|E7EPK1|E7EPK1_HUMAN Septin-7 OS=Homo sapiens GN=SEPT7 PE=1 SV=2;sp|Q16181-2|SEPT7_HUMAN Isoform 2 of Septin-7 OS=Homo sapiens GN=SEPT7;sp|Q16181|SEPT7_HUMAN Septin-7 OS=Homo sapiens GN=S
3210	H0Y4B0;A0A0D9S7H7;O43414-3;O43414-2;O43414;F6QUN3	ERI3	ERI1 exoribonuclease 3	6	6	37.7	22.89	204	203.82		2.80698	2.41056	0.396416		2.59753	1.7227	0.259535	+	+	+_+			2	4	5	3	4	3	5	6	6	2751000000		29.1128	29.4186	28.3455	25.7358	26.6514	26.0687	27.4955	26.5464	25.6033		tr|H0Y4B0|H0Y4B0_HUMAN ERI1 exoribonuclease 3 (Fragment) OS=Homo sapiens GN=ERI3 PE=1 SV=1;tr|A0A0D9S7H7|A0A0D9S7H7_CHLSB Uncharacterized protein OS=Chlorocebus sabaeus GN=ERI3 PE=4 SV=1;sp|O43414-3|ERI3_HUMAN Isoform 3 of ERI1 exoribonuclease 3 OS=Homo sa
3318	A0A0D9S903	NOC2L	Uncharacterized protein	16	16	22.9	85.586	756	82.009		-2.10054	-3.22016	1.11962		1.71007	2.11163	0.700341	+	+	+_+			15	13	12	9	11	11	3	4	2	2745300000		24.5858	24.162	23.4983	25.2717	26.712	26.5639	26.4979	27.0104	28.3982		tr|A0A0D9S903|A0A0D9S903_CHLSB Uncharacterized protein OS=Chlorocebus sabaeus GN=NOC2L PE=4 SV=1
2446	A0A0D9RUD1;P17655;P17655-2	CAPN2	Calpain-2 catalytic subunit	20	20	41.9	79.967	700	136.01		0.73166	1.09955	-0.367889		2.33345	2.10972	0.909008						14	11	13	11	10	10	14	13	13	2736600000		27.7046	27.7993	28.1106	27.2129	27.112	27.0948	27.1167	26.7172	26.482		tr|A0A0D9RUD1|A0A0D9RUD1_CHLSB Uncharacterized protein OS=Chlorocebus sabaeus GN=CAPN2 PE=3 SV=1;sp|P17655|CAN2_HUMAN Calpain-2 catalytic subunit OS=Homo sapiens GN=CAPN2 PE=1 SV=6;sp|P17655-2|CAN2_HUMAN Isoform 2 of Calpain-2 catalytic subunit OS=Homo sap
3859	P19338;A0A0D9R2V4;H7BY16	NCL	Nucleolin	20	20	29.4	76.613	710	144.27		2.79743	1.10134	1.69609		1.76474	0.236261	0.426068	+					18	5	4	5	7	8	12	12	7	2733000000		27.3002	25.5943	27.9387	23.9144	24.1402	24.3863	24.5365	23.7881	29.2047		sp|P19338|NUCL_HUMAN Nucleolin OS=Homo sapiens GN=NCL PE=1 SV=3;tr|A0A0D9R2V4|A0A0D9R2V4_CHLSB Uncharacterized protein OS=Chlorocebus sabaeus PE=4 SV=1;tr|H7BY16|H7BY16_HUMAN Nucleolin (Fragment) OS=Homo sapiens GN=NCL PE=1 SV=8
334	A0A0D9QX50;Q9Y3D0;J3KS95;H3BNV7	FAM96B	Mitotic spindle-associated MMXD complex subunit MIP18	8	8	89.3	18	168	232.06		-4.10372	-3.81464	-0.289087		2.17993	2.02956	0.590098	+	+	+_+			6	8	7	8	7	7	1	0	1	2722300000		NaN	NaN	NaN	27.1772	27.1553	27.4297	27.3266	26.9335	26.6348		tr|A0A0D9QX50|A0A0D9QX50_CHLSB Uncharacterized protein OS=Chlorocebus sabaeus GN=FAM96B PE=4 SV=1;sp|Q9Y3D0|MIP18_HUMAN Mitotic spindle-associated MMXD complex subunit MIP18 OS=Homo sapiens GN=FAM96B PE=1 SV=1;tr|J3KS95|J3KS95_HUMAN Mitotic spindle-associa
1471	A0A0D9RE84;P62318-2;P62318	SNRPD3	Small nuclear ribonucleoprotein Sm D3	5	5	38.9	13.916	126	73.189		-2.26612	-2.89115	0.625036		2.64966	2.32634	0.517337	+	+	+_+			4	5	5	5	5	4	3	3	3	2711100000		24.2287	24.7166	24.0303	26.1413	27.02	26.6126	26.6477	26.8621	28.1392		tr|A0A0D9RE84|A0A0D9RE84_CHLSB Uncharacterized protein OS=Chlorocebus sabaeus GN=SNRPD3 PE=4 SV=1;sp|P62318-2|SMD3_HUMAN Isoform 2 of Small nuclear ribonucleoprotein Sm D3 OS=Homo sapiens GN=SNRPD3;sp|P62318|SMD3_HUMAN Small nuclear ribonucleoprotein Sm D3
3156	A0A0D9S6P9;Q15417-3;Q15417;Q15417-2;E9PDU6	CNN3	Calponin-3;Calponin	11	9	36.8	36.426	329	36.475		1.51037	1.8566	-0.346229		1.75529	2.1097	0.565499		+				8	4	5	6	6	5	8	9	9	2709000000		28.92	28.9979	27.9733	26.8373	27.5165	27.0065	26.9701	26.9365	26.4149		tr|A0A0D9S6P9|A0A0D9S6P9_CHLSB Calponin OS=Chlorocebus sabaeus GN=CNN3 PE=3 SV=1;sp|Q15417-3|CNN3_HUMAN Isoform 3 of Calponin-3 OS=Homo sapiens GN=CNN3;sp|Q15417|CNN3_HUMAN Calponin-3 OS=Homo sapiens GN=CNN3 PE=1 SV=1;sp|Q15417-2|CNN3_HUMAN Isoform 2 of Ca
856	A0A0D9R4L5;Q9NZ45	CISD1	CDGSH iron-sulfur domain-containing protein 1	4	4	43.2	12.74	111	16.561		-4.08544	-4.06896	-0.0164859		2.70433	2.39856	0.0105331	+	+	+_+			1	2	2	2	4	2	1	1	1	2706600000		NaN	NaN	NaN	26.5675	27.3866	26.77	27.3275	27.362	25.9852		tr|A0A0D9R4L5|A0A0D9R4L5_CHLSB Uncharacterized protein OS=Chlorocebus sabaeus GN=CISD1 PE=4 SV=1;sp|Q9NZ45|CISD1_HUMAN CDGSH iron-sulfur domain-containing protein 1 OS=Homo sapiens GN=CISD1 PE=1 SV=1
3914	P38919	EIF4A3	Eukaryotic initiation factor 4A-III;Eukaryotic initiation factor 4A-III, N-terminally processed	24	20	65.7	46.871	411	158.53		-2.17941	-3.46733	1.28792		1.90492	1.35414	0.493462	+	+	+_+			20	9	8	4	5	9	1	2	1	2702400000		24.2863	NaN	NaN	25.7091	25.1613	25.9858	25.5784	26.0261	29.1156		sp|P38919|IF4A3_HUMAN Eukaryotic initiation factor 4A-III OS=Homo sapiens GN=EIF4A3 PE=1 SV=4
64	A0A087WXM6;J3QQT2;J3KRX5;A0A0D9SC26;A0A0A6YYL6;P18621;P18621-3;J3QLC8;A0A0A0MRF8;P18621-2;J3KRB3;A0A087WWH0;J3QS96;A0A0D9RHW3	RPL17;RPL17-C18orf32	60S ribosomal protein L17	9	9	51.5	19.586	169	62.302		0.708815	-0.0203775	0.729193		0.820268	0.0102131	0.49837						9	7	6	4	6	7	4	5	5	2697100000		27.3518	27.2683	26.4025	25.8784	26.2411	26.7767	26.3554	26.5389	28.1894		tr|A0A087WXM6|A0A087WXM6_HUMAN 60S ribosomal protein L17 (Fragment) OS=Homo sapiens GN=RPL17 PE=3 SV=1;tr|J3QQT2|J3QQT2_HUMAN 60S ribosomal protein L17 (Fragment) OS=Homo sapiens GN=RPL17 PE=3 SV=1;tr|J3KRX5|J3KRX5_HUMAN 60S ribosomal protein L17 (Fragment
2451	A0A0D9RUG4;P38435;P38435-2	GGCX	Vitamin K-dependent gamma-carboxylase	11	11	14.6	87.547	758	27.755		-4.74473	-4.55845	-0.186276		3.67054	3.44339	0.445559	+	+	+_+			9	8	8	7	7	9	1	1	0	2684500000		NaN	NaN	NaN	27.1502	27.0678	27.2233	27.2031	27.056	26.6234		tr|A0A0D9RUG4|A0A0D9RUG4_CHLSB Uncharacterized protein OS=Chlorocebus sabaeus GN=GGCX PE=4 SV=1;sp|P38435|VKGC_HUMAN Vitamin K-dependent gamma-carboxylase OS=Homo sapiens GN=GGCX PE=1 SV=2;sp|P38435-2|VKGC_HUMAN Isoform 2 of Vitamin K-dependent gamma-carbo
3934	P47929	LGALS7	Galectin-7	15	15	94.9	15.075	136	61.987		5.11526	3.64691	1.46836		1.0647	0.705967	1.01307	+					3	0	4	1	0	3	5	15	4	2683000000		31.1937	23.7852	25.3197	21.5827	NaN	NaN	24.3426	NaN	23.0194		sp|P47929|LEG7_HUMAN Galectin-7 OS=Homo sapiens GN=LGALS7 PE=1 SV=2
834	A0A0D9R4D9	SERPINB6	Uncharacterized protein	20	16	67.3	42.548	376	179.27		1.86712	1.94497	-0.0778453		4.82701	3.38285	0.168622	+	+	+_+			8	9	10	10	7	10	15	15	13	2669300000		28.3281	28.4659	28.2578	26.4337	26.5675	26.4492	26.7189	26.3591	26.1388		tr|A0A0D9R4D9|A0A0D9R4D9_CHLSB Uncharacterized protein OS=Chlorocebus sabaeus GN=SERPINB6 PE=3 SV=1
2845	A0A0D9S1C8;P61353;K7ELC7;K7EQQ9	RPL27	60S ribosomal protein L27	6	6	44.9	15.798	136	25.477		-0.0700843	-1.28398	1.21389		0.14437	0.890478	0.857908						5	4	4	5	3	3	4	5	4	2666400000		26.1547	26.1359	25.6639	26.0808	26.1819	25.9019	26.3303	26.9524	28.5236		tr|A0A0D9S1C8|A0A0D9S1C8_CHLSB 60S ribosomal protein L27 OS=Chlorocebus sabaeus GN=RPL27 PE=3 SV=1;sp|P61353|RL27_HUMAN 60S ribosomal protein L27 OS=Homo sapiens GN=RPL27 PE=1 SV=2;tr|K7ELC7|K7ELC7_HUMAN 60S ribosomal protein L27 (Fragment) OS=Homo sapiens
1423	A0A0D9RDI7;P61254;J3KTJ8;J3QRI7;J3QQQ9;J3QQV1;J3QRC4;E5RIT6;Q9UNX3;A0A0D9RB23	RPL26;RPL26L1	60S ribosomal protein L26;60S ribosomal protein L26-like 1	9	9	43.4	17.258	145	10.193		0.845604	0.357926	0.487678		1.54846	0.1658	0.247892						9	3	7	6	7	5	4	6	5	2662900000		27.1149	27.5976	26.7569	26.4307	26.2843	26.2174	25.6813	26.424	28.2903		tr|A0A0D9RDI7|A0A0D9RDI7_CHLSB Uncharacterized protein OS=Chlorocebus sabaeus GN=RPL26 PE=3 SV=1;sp|P61254|RL26_HUMAN 60S ribosomal protein L26 OS=Homo sapiens GN=RPL26 PE=1 SV=1;tr|J3KTJ8|J3KTJ8_HUMAN 60S ribosomal protein L26 (Fragment) OS=Homo sapiens G
2828	A0A0D9S0Y1;Q70UQ0-4	IKBIP	Inhibitor of nuclear factor kappa-B kinase-interacting protein	17	13	47	43.282	379	106.68		-4.97033	-4.6648	-0.305531		4.6234	3.88385	0.322	+	+	+_+			7	11	11	12	11	10	1	0	1	2662500000		NaN	NaN	NaN	26.7356	27.4587	27.3173	27.1637	27.2065	26.2249		tr|A0A0D9S0Y1|A0A0D9S0Y1_CHLSB Uncharacterized protein OS=Chlorocebus sabaeus GN=IKBIP PE=4 SV=1;sp|Q70UQ0-4|IKIP_HUMAN Isoform 4 of Inhibitor of nuclear factor kappa-B kinase-interacting protein OS=Homo sapiens GN=IKBIP
1451	A0A0D9RDV8;Q14746-2;Q14746;B7Z2Y2	COG2	Conserved oligomeric Golgi complex subunit 2	21	21	41.5	83.275	738	97.058		-4.57117	-4.23624	-0.334925		2.41063	2.14325	0.397743	+	+	+_+			12	20	17	16	16	15	0	0	1	2662300000		NaN	NaN	NaN	27.164	27.1125	27.296	27.2388	27.1758	26.1531		tr|A0A0D9RDV8|A0A0D9RDV8_CHLSB Uncharacterized protein OS=Chlorocebus sabaeus GN=COG2 PE=4 SV=1;sp|Q14746-2|COG2_HUMAN Isoform 2 of Conserved oligomeric Golgi complex subunit 2 OS=Homo sapiens GN=COG2;sp|Q14746|COG2_HUMAN Conserved oligomeric Golgi complex
1283	A0A0D9RB92;Q8TCJ2	STT3B	Dolichyl-diphosphooligosaccharide--protein glycosyltransferase subunit STT3B	14	13	16.2	93.599	825	73.976		-3.4961	-3.80651	0.310406		1.85091	1.98779	0.666697	+	+	+_+			6	12	8	10	11	10	3	2	1	2661000000		NaN	NaN	24.8949	26.5086	26.9668	27.0352	27.1852	27.3533	26.9032		tr|A0A0D9RB92|A0A0D9RB92_CHLSB Uncharacterized protein OS=Chlorocebus sabaeus GN=STT3B PE=4 SV=1;sp|Q8TCJ2|STT3B_HUMAN Dolichyl-diphosphooligosaccharide--protein glycosyltransferase subunit STT3B OS=Homo sapiens GN=STT3B PE=1 SV=1
3788	P00492;A0A0D9R5X8	HPRT1	Hypoxanthine-guanine phosphoribosyltransferase	11	11	69.7	24.579	218	120.76		1.49081	1.45729	0.0335153		2.77574	2.3816	0.0604334	+					8	8	9	7	8	8	10	10	11	2657200000		28.0393	27.7725	28.3882	26.4852	26.4929	26.7496	26.9383	26.5295	26.3604		sp|P00492|HPRT_HUMAN Hypoxanthine-guanine phosphoribosyltransferase OS=Homo sapiens GN=HPRT1 PE=1 SV=2;tr|A0A0D9R5X8|A0A0D9R5X8_CHLSB Uncharacterized protein OS=Chlorocebus sabaeus GN=HPRT1 PE=4 SV=1
357	A0A0D9QXF6;Q9BW27;Q9BW27-3;J3KT10;J3QL54;Q9BW27-2	NUP85	Nuclear pore complex protein Nup85	17	17	31.4	74.908	656	144.91		-4.55552	-4.41573	-0.139787		4.98856	5.00985	0.314847	+	+	+_+			15	16	12	13	15	14	0	0	0	2657200000		NaN	NaN	NaN	27.4105	26.967	27.0834	26.7719	27.0884	27.1812		tr|A0A0D9QXF6|A0A0D9QXF6_CHLSB Uncharacterized protein OS=Chlorocebus sabaeus GN=NUP85 PE=4 SV=1;sp|Q9BW27|NUP85_HUMAN Nuclear pore complex protein Nup85 OS=Homo sapiens GN=NUP85 PE=1 SV=1;sp|Q9BW27-3|NUP85_HUMAN Isoform 3 of Nuclear pore complex protein N
228	A0A0D9QVB3;Q9NWR8	CCDC109B	Calcium uniporter regulatory subunit MCUb, mitochondrial	11	11	35.4	38.988	336	228.97		-4.92439	-4.37569	-0.548703		3.87112	3.51769	1.06745	+	+	+_+			6	9	10	11	11	11	0	0	0	2643400000		NaN	NaN	NaN	27.0844	27.5011	27.465	26.8159	27.143	26.4455		tr|A0A0D9QVB3|A0A0D9QVB3_CHLSB Uncharacterized protein OS=Chlorocebus sabaeus GN=MCUB PE=4 SV=1;sp|Q9NWR8|MCUB_HUMAN Calcium uniporter regulatory subunit MCUb, mitochondrial OS=Homo sapiens GN=CCDC109B PE=1 SV=2
418	A0A0D9QYF9;Q9P0J0;Q9P0J0-2;B4DEZ3;K7EJE1;E7ENQ6	NDUFA13	NADH dehydrogenase [ubiquinone] 1 alpha subcomplex subunit 13	6	6	23.9	25.267	222	15.358		-3.50899	-3.67438	0.165389		1.77165	1.88604	0.246772	+	+	+_+			5	5	6	6	6	5	1	1	2	2638400000		25.0192	NaN	NaN	26.4035	26.8745	27.2506	27.1839	27.0074	26.8335		tr|A0A0D9QYF9|A0A0D9QYF9_CHLSB Uncharacterized protein OS=Chlorocebus sabaeus PE=4 SV=1;sp|Q9P0J0|NDUAD_HUMAN NADH dehydrogenase [ubiquinone] 1 alpha subcomplex subunit 13 OS=Homo sapiens GN=NDUFA13 PE=1 SV=3;sp|Q9P0J0-2|NDUAD_HUMAN Isoform 2 of NADH dehyd
2243	A0A0D9RRF2;Q9H3N1	TMX1	Thioredoxin-related transmembrane protein 1	6	6	26.1	31.8	280	103.28	247	-4.59169	-4.20815	-0.383537		2.8102	2.59907	0.753564	+	+	+_+			6	6	5	5	6	6	2	1	2	2634100000		NaN	NaN	NaN	27.1321	27.1853	27.4792	26.514	27.2322	26.8998		tr|A0A0D9RRF2|A0A0D9RRF2_CHLSB Uncharacterized protein OS=Chlorocebus sabaeus GN=TMX1 PE=4 SV=1;sp|Q9H3N1|TMX1_HUMAN Thioredoxin-related transmembrane protein 1 OS=Homo sapiens GN=TMX1 PE=1 SV=1
3982	P62191;P62191-2;A0A0D9SCC3	PSMC1	26S protease regulatory subunit 4	17	17	47.3	49.184	440	190.55		-0.675275	-1.06399	0.388719		0.75632	1.29677	0.756544						9	15	15	10	12	12	5	5	3	2626200000		26.567	25.3169	25.9228	26.8802	26.2309	26.7214	27.1476	27.1163	26.7348		sp|P62191|PRS4_HUMAN 26S protease regulatory subunit 4 OS=Homo sapiens GN=PSMC1 PE=1 SV=1;sp|P62191-2|PRS4_HUMAN Isoform 2 of 26S protease regulatory subunit 4 OS=Homo sapiens GN=PSMC1;tr|A0A0D9SCC3|A0A0D9SCC3_CHLSB Uncharacterized protein OS=Chlorocebus s
231	A0A0D9QVD3;Q6P2E9;Q6P2E9-2	EDC4	Enhancer of mRNA-decapping protein 4	25	25	26.6	151.73	1401	275.3		-2.84892	-3.13083	0.281905		2.75683	2.94008	0.272072	+	+	+_+			12	19	17	19	21	16	4	4	3	2619600000		23.8172	24.4618	23.6777	26.2415	27.0833	27.1786	27.1829	27.5812	26.5851		tr|A0A0D9QVD3|A0A0D9QVD3_CHLSB Uncharacterized protein OS=Chlorocebus sabaeus GN=EDC4 PE=4 SV=1;sp|Q6P2E9|EDC4_HUMAN Enhancer of mRNA-decapping protein 4 OS=Homo sapiens GN=EDC4 PE=1 SV=1;sp|Q6P2E9-2|EDC4_HUMAN Isoform 2 of Enhancer of mRNA-decapping prote
224	A0A0D9QV99;P62195;P62195-2;J3QQM1;J3QSA9;J3KRP2	PSMC5	26S protease regulatory subunit 8	20	19	60.8	45.626	406	207.79		-1.7287	-1.44586	-0.282831		2.47207	2.90964	0.396978	+	+	+_+			11	15	15	14	15	15	5	3	5	2618100000		25.2221	25.1589	25.4666	26.7038	27.5301	26.7997	26.6976	27.003	26.4845		tr|A0A0D9QV99|A0A0D9QV99_CHLSB Uncharacterized protein OS=Chlorocebus sabaeus GN=PSMC5 PE=3 SV=1;sp|P62195|PRS8_HUMAN 26S protease regulatory subunit 8 OS=Homo sapiens GN=PSMC5 PE=1 SV=1;sp|P62195-2|PRS8_HUMAN Isoform 2 of 26S protease regulatory subunit 8
3469	A0A0G2JQ41;Q12979-4;Q12979-2;Q12979;A0A0D9RNP0;B7Z683	ABR	Active breakpoint cluster region-related protein	19	19	30.4	88.857	777	44.792		-4.06401	-4.97931	0.915305		2.76191	4.74419	0.822045	+	+	+_+			11	17	17	10	11	15	0	0	1	2615300000		NaN	NaN	NaN	27.3139	26.3964	25.5479	27.4808	27.3074	27.2159		tr|A0A0G2JQ41|A0A0G2JQ41_HUMAN Active breakpoint cluster region-related protein (Fragment) OS=Homo sapiens GN=ABR PE=1 SV=1;sp|Q12979-4|ABR_HUMAN Isoform 4 of Active breakpoint cluster region-related protein OS=Homo sapiens GN=ABR;sp|Q12979-2|ABR_HUMAN Iso
1205	A0A0D9RA41	COX20	Uncharacterized protein	5	5	47.6	12.009	105	19.491		-4.38667	-4.56731	0.180644		2.96078	2.96728	0.302117	+	+	+_+			3	5	4	5	5	5	1	1	1	2611100000		NaN	NaN	NaN	27.2007	26.7657	26.8056	27.3385	27.2679	26.7075		tr|A0A0D9RA41|A0A0D9RA41_CHLSB Uncharacterized protein OS=Chlorocebus sabaeus GN=COX20 PE=4 SV=1
316	A0A0D9QWP1	MKI67	Uncharacterized protein	66	45	28.4	359	3251	323.31		0.61447	-2.46948	3.08395		0.40254	0.341445	0.448644						45	5	2	5	4	3	2	2	1	2596600000		20.965	NaN	20.636	20.2432	21.3501	20.6173	NaN	20.8477	29.6997		tr|A0A0D9QWP1|A0A0D9QWP1_CHLSB Uncharacterized protein OS=Chlorocebus sabaeus GN=MKI67 PE=4 SV=1
2889	A0A0D9S232;Q01650	SLC7A5	Large neutral amino acids transporter small subunit 1	4	4	9.7	55.007	507	49.876		-4.22943	-3.58044	-0.648986		3.26158	2.49771	0.709649	+	+	+_+			3	3	3	3	3	3	2	2	1	2590100000		NaN	NaN	NaN	27.4798	27.3393	27.0536	26.8322	27.2168	25.8768		tr|A0A0D9S232|A0A0D9S232_CHLSB Uncharacterized protein OS=Chlorocebus sabaeus GN=SLC7A5 PE=4 SV=1;sp|Q01650|LAT1_HUMAN Large neutral amino acids transporter small subunit 1 OS=Homo sapiens GN=SLC7A5 PE=1 SV=2
3065	A0A0D9S504	FN3KRP	Uncharacterized protein	7	7	23.9	34.447	309	56.507		2.80667	2.80913	-0.00246239		3.17682	2.97159	0.00186907	+	+	+_+			3	4	4	4	2	4	6	7	7	2588300000		28.7526	29.0084	28.8449	25.5189	26.1923	26.4748	26.3851	26.3805	25.4128		tr|A0A0D9S504|A0A0D9S504_CHLSB Uncharacterized protein OS=Chlorocebus sabaeus GN=FN3KRP PE=4 SV=1
3296	A0A0D9SCQ7;A0A0D9S8N2;Q13148;B1AKP7;G3V162;A0A087X260;A0A087WYY0;A0A087WX29;K7EJM5;K7EN94;A0A087WXQ5;A0A087WV68;Q13148-4	TARDBP	TAR DNA-binding protein 43	10	10	31.4	44.744	414	107.34		0.12605	-0.266567	0.392616		0.354003	0.445196	0.61022						10	8	8	7	9	8	8	8	8	2586800000		26.7708	26.8017	26.9313	26.9726	26.4976	26.6555	26.8911	26.8083	27.6041		tr|A0A0D9SCQ7|A0A0D9SCQ7_CHLSB Uncharacterized protein OS=Chlorocebus sabaeus PE=4 SV=1;tr|A0A0D9S8N2|A0A0D9S8N2_CHLSB Uncharacterized protein OS=Chlorocebus sabaeus PE=4 SV=1;sp|Q13148|TADBP_HUMAN TAR DNA-binding protein 43 OS=Homo sapiens GN=TARDBP PE=1
564	A0A0D9R0F3;P12956;B1AHC9;P12956-2	XRCC6	X-ray repair cross-complementing protein 6	25	25	48.8	69.84	609	86.077		0.163029	-1.01822	1.18124		0.294864	0.463136	0.567793						21	13	11	14	14	14	9	10	5	2575700000		26.2197	25.4638	25.9545	25.6496	25.7625	25.7368	26.0149	25.9327	28.7449		tr|A0A0D9R0F3|A0A0D9R0F3_CHLSB Uncharacterized protein OS=Chlorocebus sabaeus GN=XRCC6 PE=4 SV=1;sp|P12956|XRCC6_HUMAN X-ray repair cross-complementing protein 6 OS=Homo sapiens GN=XRCC6 PE=1 SV=2;tr|B1AHC9|B1AHC9_HUMAN X-ray repair cross-complementing pro
2092	A0A0D9RP06;P31946-2;P31946	YWHAB	14-3-3 protein beta/alpha;14-3-3 protein beta/alpha, N-terminally processed	15	8	58.5	28.082	246	323.31		-0.504574	-0.562995	0.0584208		0.488412	0.534374	0.117862						6	6	6	6	6	7	3	5	2	2573700000		27.0704	25.6438	25.9004	26.5929	26.6315	26.904	27.0663	26.5727	26.6647		tr|A0A0D9RP06|A0A0D9RP06_CHLSB Uncharacterized protein OS=Chlorocebus sabaeus GN=YWHAB PE=3 SV=1;sp|P31946-2|1433B_HUMAN Isoform Short of 14-3-3 protein beta/alpha OS=Homo sapiens GN=YWHAB;sp|P31946|1433B_HUMAN 14-3-3 protein beta/alpha OS=Homo sapiens GN=
938	A0A0D9R5U3	NDUFAF1	Uncharacterized protein	7	7	25.1	37.551	327	56.867		-3.1673	-3.26129	0.093991		1.39527	1.41234	0.138205	+	+	+_+			5	6	7	6	7	7	2	1	1	2559300000		NaN	NaN	25.5477	26.6178	26.9241	26.9949	27.13	27.1939	26.4948		tr|A0A0D9R5U3|A0A0D9R5U3_CHLSB Uncharacterized protein OS=Chlorocebus sabaeus GN=NDUFAF1 PE=4 SV=1
1196	A0A0D9R9V0	TFB2M	rRNA adenine N(6)-methyltransferase	12	12	40.7	44.953	396	46.173		-4.34403	-4.62712	0.283085		4.35707	4.17258	0.838419	+	+	+_+			9	10	11	9	10	9	0	0	0	2556700000		NaN	NaN	NaN	26.7548	26.7581	26.884	27.2469	27.2184	26.7809		tr|A0A0D9R9V0|A0A0D9R9V0_CHLSB rRNA adenine N(6)-methyltransferase OS=Chlorocebus sabaeus GN=TFB2M PE=3 SV=1
3083	A0A0D9S5D7;Q7Z7E8;Q7Z7E8-2	UBE2Q1	Ubiquitin-conjugating enzyme E2 Q1	9	9	17.5	46.126	422	26.253		-4.58247	-4.37018	-0.212291		3.9605	4.04046	0.442893	+	+	+_+			7	9	5	9	9	9	1	1	1	2548200000		NaN	NaN	NaN	27.4889	27.0374	26.9345	26.9764	27.1218	26.7257		tr|A0A0D9S5D7|A0A0D9S5D7_CHLSB Uncharacterized protein OS=Chlorocebus sabaeus GN=UBE2Q1 PE=3 SV=1;sp|Q7Z7E8|UB2Q1_HUMAN Ubiquitin-conjugating enzyme E2 Q1 OS=Homo sapiens GN=UBE2Q1 PE=1 SV=1;sp|Q7Z7E8-2|UB2Q1_HUMAN Isoform 2 of Ubiquitin-conjugating enzyme
843	A0A0D9R4H1;P41252;A0A0A0MSX9;J3KR24	IARS	Isoleucine--tRNA ligase, cytoplasmic	25	25	25.1	144.44	1262	123.36		0.0966263	0.0286007	0.0680256		0.394217	0.0782895	0.167258						21	20	17	16	16	18	12	10	9	2542000000		26.8616	26.7187	26.7505	26.7915	26.7559	26.4934	26.7429	26.5411	26.9609		tr|A0A0D9R4H1|A0A0D9R4H1_CHLSB Uncharacterized protein OS=Chlorocebus sabaeus GN=IARS PE=3 SV=1;sp|P41252|SYIC_HUMAN Isoleucine--tRNA ligase, cytoplasmic OS=Homo sapiens GN=IARS PE=1 SV=2;tr|A0A0A0MSX9|A0A0A0MSX9_HUMAN Isoleucine--tRNA ligase, cytoplasmic
2162	A0A0D9RQ30;P60866;P60866-2;E5RJX2	RPS20	40S ribosomal protein S20	5	5	29.4	13.373	119	12.481		1.06885	0.360882	0.707964		2.02064	0.181731	0.407027						3	3	5	4	4	4	3	4	2	2536000000		27.2619	27.5244	26.8398	25.9167	26.2774	26.2254	25.8256	26.4578	28.2601		tr|A0A0D9RQ30|A0A0D9RQ30_CHLSB Uncharacterized protein OS=Chlorocebus sabaeus GN=RPS20 PE=3 SV=1;sp|P60866|RS20_HUMAN 40S ribosomal protein S20 OS=Homo sapiens GN=RPS20 PE=1 SV=1;sp|P60866-2|RS20_HUMAN Isoform 2 of 40S ribosomal protein S20 OS=Homo sapiens
3816	P06702	S100A9	Protein S100-A9	8	5	74.6	13.242	114	146.49		2.8757	2.41209	0.463609		1.13908	0.739353	0.135208	+					5	3	3	3	3	4	5	4	3	2534000000		27.4732	26.448	29.8647	26.289	24.5294	24.3404	25.7382	23.5069	27.3046		sp|P06702|S10A9_HUMAN Protein S100-A9 OS=Homo sapiens GN=S100A9 PE=1 SV=1
2506	A0A0D9RVI0;Q8TED1;E7ETY7	GPX8	Probable glutathione peroxidase 8;Glutathione peroxidase	8	8	49.8	23.955	209	41.325		-3.73009	-3.95896	0.228868		2.07331	2.30078	0.175392	+	+	+_+			7	8	7	6	7	5	2	1	3	2530100000		NaN	24.3098	NaN	27.0362	25.9814	27.3436	26.9955	27.4992	26.5531		tr|A0A0D9RVI0|A0A0D9RVI0_CHLSB Glutathione peroxidase OS=Chlorocebus sabaeus GN=GPX8 PE=3 SV=1;sp|Q8TED1|GPX8_HUMAN Probable glutathione peroxidase 8 OS=Homo sapiens GN=GPX8 PE=1 SV=2;tr|E7ETY7|E7ETY7_HUMAN Glutathione peroxidase OS=Homo sapiens GN=GPX8 PE
2115	A0A0D9RPB8;A0A0C4DGB5;P20810-5;P20810-10;P20810-6;P20810-9;P20810-7;E9PCH5;E7EVY3;B7Z574;P20810-8;P20810-2;P20810;E9PDE4;E7ES10;P20810-3;P20810-4;H0Y7F0;H0Y9H6	CAST	Calpastatin	18	18	29.2	81.565	759	43.061		1.55143	2.50753	-0.956102		2.35951	2.51966	1.23957	+	+	+_+			3	3	6	6	5	4	16	16	16	2528800000		28.3723	28.9278	28.2197	26.641	27.0795	27.145	26.5792	25.4519	25.9661		tr|A0A0D9RPB8|A0A0D9RPB8_CHLSB Uncharacterized protein OS=Chlorocebus sabaeus GN=CAST PE=4 SV=1;tr|A0A0C4DGB5|A0A0C4DGB5_HUMAN Calpastatin OS=Homo sapiens GN=CAST PE=1 SV=1;sp|P20810-5|ICAL_HUMAN Isoform 5 of Calpastatin OS=Homo sapiens GN=CAST;sp|P20810-1
2790	A0A0D9S041;Q96JJ7	TMX3	Protein disulfide-isomerase TMX3	15	15	41.2	51.853	454	160.8		-4.08323	-3.85722	-0.226011		3.54241	3.07135	0.338981	+	+	+_+			12	11	13	14	11	11	1	0	0	2528500000		NaN	NaN	NaN	27.0712	27.2014	26.9602	27.3212	26.8355	26.3981		tr|A0A0D9S041|A0A0D9S041_CHLSB Uncharacterized protein OS=Chlorocebus sabaeus GN=TMX3 PE=4 SV=1;sp|Q96JJ7|TMX3_HUMAN Protein disulfide-isomerase TMX3 OS=Homo sapiens GN=TMX3 PE=1 SV=2
2480	A0A0D9RUV7;Q92575	UBXN4	UBX domain-containing protein 4	6	6	17.3	56.818	508	111.72		-3.80599	-3.90222	0.0962315		3.74556	4.45116	0.125779	+	+	+_+			4	5	6	3	6	6	1	1	1	2523900000		NaN	NaN	NaN	27.3386	26.5782	26.6191	26.8314	26.7881	27.2051		tr|A0A0D9RUV7|A0A0D9RUV7_CHLSB Uncharacterized protein OS=Chlorocebus sabaeus GN=UBXN4 PE=4 SV=1;sp|Q92575|UBXN4_HUMAN UBX domain-containing protein 4 OS=Homo sapiens GN=UBXN4 PE=1 SV=2
250	A0A0D9QVL4;Q8N5K1;D6RCF4	CISD2	CDGSH iron-sulfur domain-containing protein 2	6	6	45.9	15.279	135	73.636		-1.38865	-1.1955	-0.193149		2.51341	2.39107	0.486238	+					6	5	5	6	6	4	4	2	3	2522400000		25.8705	25.3062	25.4403	26.73	26.868	27.1851	26.8913	26.7856	26.5267		tr|A0A0D9QVL4|A0A0D9QVL4_CHLSB Uncharacterized protein OS=Chlorocebus sabaeus GN=CISD2 PE=4 SV=1;sp|Q8N5K1|CISD2_HUMAN CDGSH iron-sulfur domain-containing protein 2 OS=Homo sapiens GN=CISD2 PE=1 SV=1;tr|D6RCF4|D6RCF4_HUMAN CDGSH iron-sulfur domain-containi
3842	P12235;A0A0D9S2H0;V9GYG0	SLC25A4	ADP/ATP translocase 1	24	5	63.1	33.064	298	15.508		-1.41451	-1.53138	0.116868		2.37275	1.77661	0.114634	+					5	5	5	5	5	4	4	4	4	2522000000		25.4155	25.5999	24.9651	26.5468	27.0384	26.6389	27.0573	27.3182	26.1992		sp|P12235|ADT1_HUMAN ADP/ATP translocase 1 OS=Homo sapiens GN=SLC25A4 PE=1 SV=4;tr|A0A0D9S2H0|A0A0D9S2H0_CHLSB Uncharacterized protein OS=Chlorocebus sabaeus GN=SLC25A4 PE=3 SV=1;tr|V9GYG0|V9GYG0_HUMAN ADP/ATP translocase 1 OS=Homo sapiens GN=SLC25A4 PE=1
705	A0A0D9R2K9;P26641;P26641-2	EEF1G	Elongation factor 1-gamma	16	16	36.6	50.122	437	65.05		1.5566	0.895646	0.660953		2.44268	2.1361	1.44197	+					13	14	10	9	10	14	8	7	7	2520000000		27.7728	27.2267	27.5743	26.3625	25.7408	25.8007	26.7464	26.4796	26.6608		tr|A0A0D9R2K9|A0A0D9R2K9_CHLSB Uncharacterized protein OS=Chlorocebus sabaeus GN=EEF1G PE=4 SV=1;sp|P26641|EF1G_HUMAN Elongation factor 1-gamma OS=Homo sapiens GN=EEF1G PE=1 SV=3;sp|P26641-2|EF1G_HUMAN Isoform 2 of Elongation factor 1-gamma OS=Homo sapiens
1864	A0A0D9RKH2;P07737;K7EJ44	PFN1	Profilin-1	8	6	65	15.054	140	34.647		1.43278	1.57404	-0.141259		0.88071	0.954532	0.116701						4	4	3	3	4	4	6	6	4	2518100000		28.6496	26.6319	28.798	27.1523	26.1589	26.4699	25.9133	26.3978	27.0463		tr|A0A0D9RKH2|A0A0D9RKH2_CHLSB Profilin OS=Chlorocebus sabaeus GN=PFN1 PE=3 SV=1;sp|P07737|PROF1_HUMAN Profilin-1 OS=Homo sapiens GN=PFN1 PE=1 SV=2;tr|K7EJ44|K7EJ44_HUMAN Profilin OS=Homo sapiens GN=PFN1 PE=1 SV=1
3819	P06753-2;Q5HYB6;A0A087WWU8;A0A0D9S5H6;P06753-3;P06753-6;P06753-5;Q5VU61;P06753-4	TPM3;DKFZp686J1372	Tropomyosin alpha-3 chain	31	9	75	29.032	248	187.7		1.62119	1.41279	0.208392		2.61104	2.17675	0.334562	+					5	5	5	4	5	6	7	8	6	2513400000		28.3238	27.859	27.7264	26.6382	26.3007	26.1067	26.363	26.3417	26.9662		sp|P06753-2|TPM3_HUMAN Isoform 2 of Tropomyosin alpha-3 chain OS=Homo sapiens GN=TPM3;tr|Q5HYB6|Q5HYB6_HUMAN Epididymis luminal protein 189 OS=Homo sapiens GN=DKFZp686J1372 PE=1 SV=1;tr|A0A087WWU8|A0A087WWU8_HUMAN Tropomyosin alpha-3 chain OS=Homo sapiens
1172	A0A0D9R9E0;A0A0A0MQS1;Q53H96-2;Q53H96;B5MD87	PYCRL	Pyrroline-5-carboxylate reductase;Pyrroline-5-carboxylate reductase 3	8	8	37.1	29.947	286	25.593		-1.24979	-1.33204	0.0822481		2.00611	2.38899	0.140808						6	6	6	6	4	6	5	3	4	2509900000		25.4984	25.2261	25.9015	26.9726	26.983	26.4198	27.0221	26.6583	26.9418		tr|A0A0D9R9E0|A0A0D9R9E0_CHLSB Pyrroline-5-carboxylate reductase OS=Chlorocebus sabaeus GN=PYCRL PE=3 SV=1;tr|A0A0A0MQS1|A0A0A0MQS1_HUMAN Pyrroline-5-carboxylate reductase OS=Homo sapiens GN=PYCRL PE=1 SV=1;sp|Q53H96-2|P5CR3_HUMAN Isoform 2 of Pyrroline-5-
967	A0A0D9R6A2;Q92499;F1T0B3;A0A087X2G1;Q92499-3;Q92499-2	DDX1	ATP-dependent RNA helicase DDX1	21	21	36.5	82.49	740	323.31		1.62699	0.902477	0.724511		2.66681	0.826491	0.609334	+					18	13	13	10	10	10	8	9	9	2497500000		27.7825	27.7175	27.4178	25.6196	26.1245	26.2927	26.4941	26.0297	27.6866		tr|A0A0D9R6A2|A0A0D9R6A2_CHLSB Uncharacterized protein OS=Chlorocebus sabaeus GN=DDX1 PE=4 SV=1;sp|Q92499|DDX1_HUMAN ATP-dependent RNA helicase DDX1 OS=Homo sapiens GN=DDX1 PE=1 SV=2;tr|F1T0B3|F1T0B3_HUMAN ATP-dependent RNA helicase DDX1 OS=Homo sapiens GN
1418	A0A0D9RDH4;P35580;P35580-5;P35580-2;P35580-3;P35580-4	MYH10	Myosin-10	61	52	36.7	229.02	1976	323.31		1.76278	-1.15625	2.91903		1.37008	0.140674	0.416318						51	9	3	3	6	5	1	0	2	2489900000		NaN	21.3719	NaN	20.8182	20.8897	20.6961	20.1107	21.4093	29.6411		tr|A0A0D9RDH4|A0A0D9RDH4_CHLSB Uncharacterized protein OS=Chlorocebus sabaeus GN=MYH10 PE=3 SV=1;sp|P35580|MYH10_HUMAN Myosin-10 OS=Homo sapiens GN=MYH10 PE=1 SV=3;sp|P35580-5|MYH10_HUMAN Isoform 5 of Myosin-10 OS=Homo sapiens GN=MYH10;sp|P35580-2|MYH10_HU
1766	A0A0D9RIY5;P08183-2;P08183	ABCB1	Multidrug resistance protein 1	20	20	20.4	141.43	1280	162.05		-3.89356	-3.05276	-0.840799		2.42116	2.01948	1.75359	+	+	+_+			10	16	13	15	17	15	4	2	0	2486600000		23.5287	NaN	24.3684	27.0811	27.1833	27.5127	26.5738	26.6067	26.0742		tr|A0A0D9RIY5|A0A0D9RIY5_CHLSB Uncharacterized protein OS=Chlorocebus sabaeus GN=ABCB1 PE=4 SV=1;sp|P08183-2|MDR1_HUMAN Isoform 2 of Multidrug resistance protein 1 OS=Homo sapiens GN=ABCB1;sp|P08183|MDR1_HUMAN Multidrug resistance protein 1 OS=Homo sapiens
545	A0A0D9R051;Q07960;H0YE29	ARHGAP1	Rho GTPase-activating protein 1	17	17	48.7	50.538	439	52.676		-3.02747	-2.89262	-0.134853		1.81194	1.91064	0.118143	+	+	+_+			11	14	15	14	13	12	0	1	2	2484000000		NaN	25.0876	NaN	27.6391	26.7985	26.3504	26.691	27.1326	26.5598		tr|A0A0D9R051|A0A0D9R051_CHLSB Uncharacterized protein OS=Chlorocebus sabaeus GN=ARHGAP1 PE=4 SV=1;sp|Q07960|RHG01_HUMAN Rho GTPase-activating protein 1 OS=Homo sapiens GN=ARHGAP1 PE=1 SV=1;tr|H0YE29|H0YE29_HUMAN Rho GTPase-activating protein 1 (Fragment)
956	A0A0D9R627;Q9BWH6;Q9BWH6-2	RPAP1	RNA polymerase II-associated protein 1	11	11	11	152.68	1393	84.154		-4.57551	-4.16059	-0.41492		4.09439	3.7426	1.33638	+	+	+_+			8	8	8	7	9	11	0	0	0	2472800000		NaN	NaN	NaN	27.1184	27.2211	27.1948	26.9299	26.8789	26.4808		tr|A0A0D9R627|A0A0D9R627_CHLSB Uncharacterized protein OS=Chlorocebus sabaeus GN=RPAP1 PE=4 SV=1;sp|Q9BWH6|RPAP1_HUMAN RNA polymerase II-associated protein 1 OS=Homo sapiens GN=RPAP1 PE=1 SV=3;sp|Q9BWH6-2|RPAP1_HUMAN Isoform 2 of RNA polymerase II-associat
1735	A0A0D9RIK3;P30049	ATP5D	ATP synthase subunit delta, mitochondrial	2	2	13.7	17.431	168	5.4893		-1.20561	-1.23418	0.0285683		0.987952	2.01598	0.0181476						2	2	2	2	2	2	2	2	2	2461900000		25.319	25.36	26.0854	27.7334	26.6899	25.958	26.6465	26.9546	26.8658		tr|A0A0D9RIK3|A0A0D9RIK3_CHLSB Uncharacterized protein OS=Chlorocebus sabaeus GN=ATP5D PE=3 SV=1;sp|P30049|ATPD_HUMAN ATP synthase subunit delta, mitochondrial OS=Homo sapiens GN=ATP5D PE=1 SV=2
2964	A0A0D9S3D7;P16615-5;P16615-2;P16615-3	ATP2A2	Sarcoplasmic/endoplasmic reticulum calcium ATPase 2	40	3	42.5	109.73	997	323.31		-4.07209	-3.65881	-0.413275		4.08009	3.62263	1.19626	+	+	+_+			3	3	3	3	3	3	0	0	0	2458300000		NaN	NaN	NaN	27.0241	26.9472	26.8984	26.6611	26.7387	26.23		tr|A0A0D9S3D7|A0A0D9S3D7_CHLSB Calcium-transporting ATPase OS=Chlorocebus sabaeus GN=ATP2A2 PE=3 SV=1;sp|P16615-5|AT2A2_HUMAN Isoform 5 of Sarcoplasmic/endoplasmic reticulum calcium ATPase 2 OS=Homo sapiens GN=ATP2A2;sp|P16615-2|AT2A2_HUMAN Isoform 2 of Sa
2969	A0A0D9SDR8;A0A0D9S3E8;P62829;C9JD32;J3KT29;B9ZVP7	RPL23	60S ribosomal protein L23	7	7	50.7	14.847	140	16.336		0.626239	-0.229499	0.855738		0.465889	0.166806	0.646814						6	5	4	4	4	4	3	6	4	2456600000		27.0512	26.9492	25.9435	25.1232	26.2872	26.6548	26.8097	26.2563	27.5664		tr|A0A0D9SDR8|A0A0D9SDR8_CHLSB Uncharacterized protein OS=Chlorocebus sabaeus PE=3 SV=1;tr|A0A0D9S3E8|A0A0D9S3E8_CHLSB Uncharacterized protein OS=Chlorocebus sabaeus PE=3 SV=1;sp|P62829|RL23_HUMAN 60S ribosomal protein L23 OS=Homo sapiens GN=RPL23 PE=1 SV=
1607	A0A0D9RGG4;O75533	SF3B1	Splicing factor 3B subunit 1	35	35	41.6	145.83	1304	278.29		-3.52837	-4.13411	0.605739		2.61196	1.93854	0.308821	+	+	+_+			35	17	12	12	13	15	0	1	0	2453600000		NaN	NaN	NaN	26.401	26.1353	26.5849	26.0958	26.2884	28.5542		tr|A0A0D9RGG4|A0A0D9RGG4_CHLSB Uncharacterized protein OS=Chlorocebus sabaeus GN=SF3B1 PE=4 SV=1;sp|O75533|SF3B1_HUMAN Splicing factor 3B subunit 1 OS=Homo sapiens GN=SF3B1 PE=1 SV=3
3433	A0A0D9SDD5;Q8IYI6	EXOC8	Exocyst complex component 8	17	17	29.4	81.798	725	45.217		-4.75274	-4.30794	-0.444798		4.15833	4.07063	0.94633	+	+	+_+			11	13	12	14	12	13	2	1	2	2439600000		NaN	NaN	NaN	26.8584	27.4213	27.033	26.8634	26.7331	26.3818		tr|A0A0D9SDD5|A0A0D9SDD5_CHLSB Uncharacterized protein OS=Chlorocebus sabaeus GN=EXOC8 PE=4 SV=1;sp|Q8IYI6|EXOC8_HUMAN Exocyst complex component 8 OS=Homo sapiens GN=EXOC8 PE=1 SV=2
2123	A0A0D9RPF0;P61019;P61019-2;E9PKL7	RAB2A	Ras-related protein Rab-2A	15	8	67.5	23.545	212	228.24		-2.94172	-2.6368	-0.304916		1.3456	1.24611	0.511049	+	+	+_+			8	6	6	6	4	7	2	1	2	2435800000		NaN	24.5408	25.5798	27.5438	26.7037	26.9252	26.6272	26.7552	26.8757		tr|A0A0D9RPF0|A0A0D9RPF0_CHLSB Uncharacterized protein OS=Chlorocebus sabaeus GN=RAB2A PE=4 SV=1;sp|P61019|RAB2A_HUMAN Ras-related protein Rab-2A OS=Homo sapiens GN=RAB2A PE=1 SV=1;sp|P61019-2|RAB2A_HUMAN Isoform 2 of Ras-related protein Rab-2A OS=Homo sap
4021	Q02338;A0A0D9R8R9;E9PCG9;C9K0G7;C9JM78;C9JQ90;A0A0G2JRX6	BDH1	D-beta-hydroxybutyrate dehydrogenase, mitochondrial	10	10	30.9	38.157	343	38.398		-1.18728	-0.546951	-0.640328		3.08593	1.90459	3.05348	+					7	10	8	10	8	9	4	4	3	2432800000		26.0303	25.6206	25.8353	26.9364	27.1244	26.9873	26.4306	26.4103	26.2862		sp|Q02338|BDH_HUMAN D-beta-hydroxybutyrate dehydrogenase, mitochondrial OS=Homo sapiens GN=BDH1 PE=1 SV=3;tr|A0A0D9R8R9|A0A0D9R8R9_CHLSB Uncharacterized protein OS=Chlorocebus sabaeus GN=BDH1 PE=3 SV=1;tr|E9PCG9|E9PCG9_HUMAN D-beta-hydroxybutyrate dehydrog
1624	A0A0D9RGR4;P33176	KIF5B	Kinesin-1 heavy chain	21	21	26.1	109.79	963	50.817		-0.533727	-0.863613	0.329886		0.634788	1.8103	0.414344						14	14	16	16	15	15	4	6	4	2432300000		25.8806	26.3447	25.6962	27.1598	26.1654	26.1975	26.709	26.7904	27.013		tr|A0A0D9RGR4|A0A0D9RGR4_CHLSB Kinesin-like protein OS=Chlorocebus sabaeus GN=KIF5B PE=3 SV=1;sp|P33176|KINH_HUMAN Kinesin-1 heavy chain OS=Homo sapiens GN=KIF5B PE=1 SV=1
3949	P52272;P52272-2;A0A087X0X3;M0QZM1	HNRNPM	Heterogeneous nuclear ribonucleoprotein M	47	5	73.7	77.515	730	323.31		-2.65134	-3.2369	0.585558		1.51496	1.15618	0.204845	+	+	+_+			5	3	3	3	3	3	1	2	1	2431900000		24.5865	NaN	NaN	25.2146	26.0029	26.0133	25.2081	25.307	28.4723		sp|P52272|HNRPM_HUMAN Heterogeneous nuclear ribonucleoprotein M OS=Homo sapiens GN=HNRNPM PE=1 SV=3;sp|P52272-2|HNRPM_HUMAN Isoform 2 of Heterogeneous nuclear ribonucleoprotein M OS=Homo sapiens GN=HNRNPM;tr|A0A087X0X3|A0A087X0X3_HUMAN Heterogeneous nuclea
1493	A0A0D9REQ8;Q9BVC4-5;Q9BVC4;A0A0A0MR05;H3BSZ4;Q9BVC4-3;H3BPT1;H3BN58	MLST8	Target of rapamycin complex subunit LST8	11	11	53.1	35.86	326	291.06		-3.62803	-3.81997	0.191948		3.63168	3.78165	1.16212	+	+	+_+			8	10	8	9	11	10	0	0	0	2430400000		NaN	NaN	NaN	26.987	26.8341	26.7204	27.0555	27.0328	27.0291		tr|A0A0D9REQ8|A0A0D9REQ8_CHLSB Uncharacterized protein OS=Chlorocebus sabaeus GN=MLST8 PE=4 SV=1;sp|Q9BVC4-5|LST8_HUMAN Isoform 4 of Target of rapamycin complex subunit LST8 OS=Homo sapiens GN=MLST8;sp|Q9BVC4|LST8_HUMAN Target of rapamycin complex subunit
2644	A0A0D9RXX3;O60645-2;O60645-3;O60645;D6RB59	EXOC3	Exocyst complex component 3	16	16	28.5	85.573	745	150.19		-4.71472	-4.77052	0.0557982		3.78238	3.92911	0.123287	+	+	+_+			10	14	13	13	11	11	1	0	0	2426400000		NaN	NaN	NaN	27.1897	26.9022	26.679	26.9843	27.1055	26.8484		tr|A0A0D9RXX3|A0A0D9RXX3_CHLSB Uncharacterized protein OS=Chlorocebus sabaeus GN=EXOC3 PE=4 SV=1;sp|O60645-2|EXOC3_HUMAN Isoform 2 of Exocyst complex component 3 OS=Homo sapiens GN=EXOC3;sp|O60645-3|EXOC3_HUMAN Isoform 3 of Exocyst complex component 3 OS=H
1150	A0A0D9R8Z3;E9PKH6;E9PPW7;O00217;E9PN51;F8W9K7	NDUFS8	NADH dehydrogenase [ubiquinone] iron-sulfur protein 8, mitochondrial	7	7	33.8	24.998	222	28.724		-4.75305	-4.33545	-0.417607		3.89587	3.25571	0.57032	+	+	+_+			4	6	6	7	7	5	1	1	1	2426100000		NaN	NaN	NaN	26.8604	27.1949	27.1952	26.8854	27.0507	26.0615		tr|A0A0D9R8Z3|A0A0D9R8Z3_CHLSB Uncharacterized protein OS=Chlorocebus sabaeus GN=NDUFS8 PE=3 SV=1;tr|E9PKH6|E9PKH6_HUMAN NADH dehydrogenase [ubiquinone] iron-sulfur protein 8, mitochondrial (Fragment) OS=Homo sapiens GN=NDUFS8 PE=1 SV=1;tr|E9PPW7|E9PPW7_HU
3237	A0A0D9S7X4;Q13347	EIF3I	Eukaryotic translation initiation factor 3 subunit I	11	11	40.9	36.501	325	48.462		0.212999	0.105935	0.107065		0.229278	0.0998085	0.150228						8	8	9	8	8	9	5	6	6	2419200000		27.3062	26.7108	26.1928	26.8557	26.4233	26.2918	26.2458	26.7064	26.9399		tr|A0A0D9S7X4|A0A0D9S7X4_CHLSB Eukaryotic translation initiation factor 3 subunit I OS=Chlorocebus sabaeus GN=EIF3I PE=3 SV=1;sp|Q13347|EIF3I_HUMAN Eukaryotic translation initiation factor 3 subunit I OS=Homo sapiens GN=EIF3I PE=1 SV=1
2792	A0A0D9S051	TIMM21	Uncharacterized protein	7	7	28.6	28.516	248	7.2844		-2.35394	-2.54885	0.194907		1.4481	1.56145	0.379669	+	+	+_+			4	5	6	6	6	6	1	1	1	2415500000		25.1789	NaN	25.0262	27.0407	26.5166	26.6031	27.0254	27.0867	26.6331		tr|A0A0D9S051|A0A0D9S051_CHLSB Uncharacterized protein OS=Chlorocebus sabaeus GN=TIMM21 PE=4 SV=1
2237	A0A0D9RR91;Q9NQW6;Q9NQW6-2	ANLN	Actin-binding protein anillin	23	23	22	126.58	1145	65.144		0.199541	0.512527	-0.312986		0.339187	0.642795	0.453602						10	18	13	16	16	16	12	13	12	2413100000		26.999	27.4742	26.7056	27.0133	26.8798	26.687	26.7556	26.8963	25.9893		tr|A0A0D9RR91|A0A0D9RR91_CHLSB Uncharacterized protein OS=Chlorocebus sabaeus GN=ANLN PE=4 SV=1;sp|Q9NQW6|ANLN_HUMAN Actin-binding protein anillin OS=Homo sapiens GN=ANLN PE=1 SV=2;sp|Q9NQW6-2|ANLN_HUMAN Isoform 2 of Actin-binding protein anillin OS=Homo s
2632	A0A0D9RXQ8;Q8NF37;A0A0G2JQ62	LPCAT1	Lysophosphatidylcholine acyltransferase 1	12	12	28.7	59.251	534	98.989		-3.96873	-3.83734	-0.131382		4.3355	4.99642	0.255573	+	+	+_+			11	10	10	10	10	9	1	1	1	2408200000		NaN	NaN	NaN	26.6317	27.1303	27.2181	27.0415	26.8045	26.74		tr|A0A0D9RXQ8|A0A0D9RXQ8_CHLSB Uncharacterized protein OS=Chlorocebus sabaeus GN=LPCAT1 PE=4 SV=1;sp|Q8NF37|PCAT1_HUMAN Lysophosphatidylcholine acyltransferase 1 OS=Homo sapiens GN=LPCAT1 PE=1 SV=2;tr|A0A0G2JQ62|A0A0G2JQ62_HUMAN Lysophosphatidylcholine acy
2388	A0A0D9RTG7;Q16831	UPP1	Uridine phosphorylase 1	9	9	39.4	33.882	310	185.94		2.56914	2.05786	0.511286		5.36065	3.08707	1.05588	+	+	+_+			5	6	4	5	4	5	8	6	7	2403700000		28.2221	28.3634	28.3876	25.8215	25.7973	25.647	26.6278	25.8657	26.306		tr|A0A0D9RTG7|A0A0D9RTG7_CHLSB Uridine phosphorylase OS=Chlorocebus sabaeus GN=UPP1 PE=3 SV=1;sp|Q16831|UPP1_HUMAN Uridine phosphorylase 1 OS=Homo sapiens GN=UPP1 PE=1 SV=1
4047	Q13185;A0A0D9RNX8;S4R2Y4	CBX3	Chromobox protein homolog 3	10	9	57.9	20.811	183	88.865		3.71501	0.456725	3.25829		1.4792	0.073423	0.589433	+					8	1	3	1	1	1	2	4	2	2402800000		25.9902	25.6216	25.783	NaN	24.3489	NaN	24.8597	NaN	29.3348		sp|Q13185|CBX3_HUMAN Chromobox protein homolog 3 OS=Homo sapiens GN=CBX3 PE=1 SV=4;tr|A0A0D9RNX8|A0A0D9RNX8_CHLSB Uncharacterized protein OS=Chlorocebus sabaeus GN=CBX3 PE=4 SV=1;tr|S4R2Y4|S4R2Y4_HUMAN Chromobox protein homolog 3 (Fragment) OS=Homo sapiens
3188	A0A0D9S761;Q9UPU5	USP24	Ubiquitin carboxyl-terminal hydrolase 24	27	27	14.9	276.07	2445	141.34		-0.389824	-0.231266	-0.158558		1.65232	0.656389	0.574532						18	20	20	19	21	21	14	12	8	2399400000		26.2619	26.6036	26.3277	26.824	26.7985	26.7402	26.7599	26.7384	26.3887		tr|A0A0D9S761|A0A0D9S761_CHLSB Uncharacterized protein OS=Chlorocebus sabaeus GN=USP24 PE=3 SV=1;sp|Q9UPU5|UBP24_HUMAN Ubiquitin carboxyl-terminal hydrolase 24 OS=Homo sapiens GN=USP24 PE=1 SV=3
3436	A0A0D9SDJ2;Q9NWZ8	GEMIN8	Gem-associated protein 8	9	9	42.6	28.429	242	13.133		-3.83429	-3.69172	-0.142564		3.87418	2.73899	0.118017	+	+	+_+			6	8	6	6	6	8	0	0	0	2391400000		NaN	NaN	NaN	27.0137	27.0034	26.7796	27.3613	27.0674	25.9402		tr|A0A0D9SDJ2|A0A0D9SDJ2_CHLSB Uncharacterized protein OS=Chlorocebus sabaeus PE=4 SV=1;sp|Q9NWZ8|GEMI8_HUMAN Gem-associated protein 8 OS=Homo sapiens GN=GEMIN8 PE=1 SV=1
2008	A0A0D9RMJ4;P22314-2;P22314	UBA1	Ubiquitin-like modifier-activating enzyme 1	17	17	23.3	118.09	1058	46.231		0.72371	0.860946	-0.137236		1.26075	1.28316	0.260761						11	8	5	7	8	11	13	13	10	2385600000		26.7628	27.3867	27.606	26.3851	26.4948	26.7045	26.5862	26.0158	26.5707		tr|A0A0D9RMJ4|A0A0D9RMJ4_CHLSB Uncharacterized protein OS=Chlorocebus sabaeus GN=UBA1 PE=3 SV=1;sp|P22314-2|UBA1_HUMAN Isoform 2 of Ubiquitin-like modifier-activating enzyme 1 OS=Homo sapiens GN=UBA1;sp|P22314|UBA1_HUMAN Ubiquitin-like modifier-activating
4340	Q9Y282;Q9Y282-3;H0Y621;H0Y5K5;Q9Y282-2	ERGIC3	Endoplasmic reticulum-Golgi intermediate compartment protein 3	9	9	21.1	43.222	383	30.356		-4.47436	-3.98476	-0.489596		6.20851	4.5873	1.31491	+	+	+_+			4	8	7	9	9	9	0	0	0	2379100000		NaN	NaN	NaN	27.1725	27.2594	27.1123	26.8621	26.8596	26.3536		sp|Q9Y282|ERGI3_HUMAN Endoplasmic reticulum-Golgi intermediate compartment protein 3 OS=Homo sapiens GN=ERGIC3 PE=1 SV=1;sp|Q9Y282-3|ERGI3_HUMAN Isoform 3 of Endoplasmic reticulum-Golgi intermediate compartment protein 3 OS=Homo sapiens GN=ERGIC3;tr|H0Y621
1906	A0A0D9RKZ5;P12814-2;P12814;P12814-3;P12814-4;H9KV75	ACTN1	Alpha-actinin-1	40	22	51	105.54	914	323.31		0.353942	-1.81801	2.17196		0.653818	0.30157	0.372517						22	4	4	4	2	7	3	3	2	2376200000		22.7043	22.6418	23.3424	22.7396	22.463	22.4241	22.0329	22.5228	29.5869		tr|A0A0D9RKZ5|A0A0D9RKZ5_CHLSB Uncharacterized protein OS=Chlorocebus sabaeus GN=ACTN1 PE=4 SV=1;sp|P12814-2|ACTN1_HUMAN Isoform 2 of Alpha-actinin-1 OS=Homo sapiens GN=ACTN1;sp|P12814|ACTN1_HUMAN Alpha-actinin-1 OS=Homo sapiens GN=ACTN1 PE=1 SV=2;sp|P1281
2185	A0A0D9RQD5;Q14257;Q14257-2;H0YL43;A8MXP8	RCN2	Reticulocalbin-2	10	10	42	36.842	317	108.89		-0.496071	-0.751497	0.255426		0.530351	1.04361	0.218702						5	9	8	4	3	9	4	3	5	2374900000		26.4115	25.9526	25.7465	26.9689	26.8156	25.8143	27.2479	26.8213	26.2959		tr|A0A0D9RQD5|A0A0D9RQD5_CHLSB Uncharacterized protein OS=Chlorocebus sabaeus GN=RCN2 PE=4 SV=1;sp|Q14257|RCN2_HUMAN Reticulocalbin-2 OS=Homo sapiens GN=RCN2 PE=1 SV=1;sp|Q14257-2|RCN2_HUMAN Isoform 2 of Reticulocalbin-2 OS=Homo sapiens GN=RCN2;tr|H0YL43|H
1161	A0A0D9R974	ERMP1	Uncharacterized protein	10	2	20.6	76.488	680	48.706		-3.64402	-3.58232	-0.0617021		1.80556	2.37838	0.0303379	+	+	+_+			2	2	2	2	2	2	0	0	0	2367900000		NaN	NaN	NaN	25.9503	28.0214	26.0431	26.4078	26.7961	26.6259		tr|A0A0D9R974|A0A0D9R974_CHLSB Uncharacterized protein OS=Chlorocebus sabaeus GN=ERMP1 PE=4 SV=1
1573	A0A0D9RG03;Q8WWC4	C2orf47	Uncharacterized protein C2orf47, mitochondrial	7	7	23.4	32.579	291	14.013		-1.13568	-0.627061	-0.508623		3.10612	0.765958	0.59463						5	6	5	6	6	5	4	4	4	2358900000		25.9475	26.0032	25.7578	26.8447	27.1705	27.1003	27.008	26.7787	25.803		tr|A0A0D9RG03|A0A0D9RG03_CHLSB Uncharacterized protein OS=Chlorocebus sabaeus GN=MAIP1 PE=4 SV=1;sp|Q8WWC4|CB047_HUMAN Uncharacterized protein C2orf47, mitochondrial OS=Homo sapiens GN=C2orf47 PE=1 SV=1
2265	A0A0D9RRS7;P11233;H7C3P7	RALA	Ras-related protein Ral-A	8	4	37.4	23.567	206	75.44		-3.3361	-2.94333	-0.392772		1.06658	0.937311	0.365703	+					2	4	4	3	3	4	0	1	2	2353000000		NaN	26.4011	NaN	26.2496	27.1648	27.2548	26.2802	27.1148	26.0959		tr|A0A0D9RRS7|A0A0D9RRS7_CHLSB Uncharacterized protein OS=Chlorocebus sabaeus GN=RALA PE=4 SV=1;sp|P11233|RALA_HUMAN Ras-related protein Ral-A OS=Homo sapiens GN=RALA PE=1 SV=1;tr|H7C3P7|H7C3P7_HUMAN Ras-related protein Ral-A (Fragment) OS=Homo sapiens GN=
1360	A0A0D9RCM1	CDC42BPB	Uncharacterized protein	70	5	57.4	146.44	1293	24.139	1272	-3.87238	-4.60396	0.731578		2.93063	3.48953	1.24909	+	+	+_+			4	4	3	2	2	4	0	0	0	2349500000		NaN	NaN	NaN	26.9251	26.0231	26.4413	27.168	27.3582	27.0582		tr|A0A0D9RCM1|A0A0D9RCM1_CHLSB Uncharacterized protein OS=Chlorocebus sabaeus GN=CDC42BPB PE=4 SV=1
410	A0A0D9QYC3;Q9NV70-2;Q9NV70	EXOC1	Exocyst complex component 1	16	16	25	102.78	901	86.667		-4.18106	-4.28273	0.101672		2.81881	2.75646	0.176307	+	+	+_+			10	13	12	13	12	15	0	0	0	2347800000		NaN	NaN	NaN	26.8664	26.918	26.6944	27.2547	26.9879	26.5413		tr|A0A0D9QYC3|A0A0D9QYC3_CHLSB Uncharacterized protein OS=Chlorocebus sabaeus GN=EXOC1 PE=4 SV=1;sp|Q9NV70-2|EXOC1_HUMAN Isoform 2 of Exocyst complex component 1 OS=Homo sapiens GN=EXOC1;sp|Q9NV70|EXOC1_HUMAN Exocyst complex component 1 OS=Homo sapiens GN=
3310	A0A0D9S8V7;O15258;Q5T092;A0A0A0MR06;Q5T091	RER1	Protein RER1	5	5	33.7	22.958	196	23.505		-4.35602	-4.07366	-0.282359		3.46777	3.10382	0.411885	+	+	+_+			3	5	4	4	4	5	0	0	0	2341300000		NaN	NaN	NaN	27.1264	27.0996	26.7231	27.1265	26.7482	26.2274		tr|A0A0D9S8V7|A0A0D9S8V7_CHLSB Uncharacterized protein OS=Chlorocebus sabaeus GN=RER1 PE=4 SV=1;sp|O15258|RER1_HUMAN Protein RER1 OS=Homo sapiens GN=RER1 PE=1 SV=1;tr|Q5T092|Q5T092_HUMAN Protein RER1 (Fragment) OS=Homo sapiens GN=RER1 PE=1 SV=1;tr|A0A0A0MR
2427	A0A0D9RU47;P63151;P63151-2	PPP2R2A	Serine/threonine-protein phosphatase 2A 55 kDa regulatory subunit B alpha isoform	18	8	48.5	51.691	447	109.12		0.329851	0.162914	0.166937		0.874439	0.296812	0.294252						7	7	7	6	5	7	3	3	3	2331600000		26.9778	26.8498	26.5795	26.6258	26.579	26.2128	26.8797	26.7724	26.2663		tr|A0A0D9RU47|A0A0D9RU47_CHLSB Serine/threonine-protein phosphatase 2A 55 kDa regulatory subunit B OS=Chlorocebus sabaeus GN=PPP2R2A PE=3 SV=1;sp|P63151|2ABA_HUMAN Serine/threonine-protein phosphatase 2A 55 kDa regulatory subunit B alpha isoform OS=Homo sa
1241	A0A0D9RAN8;Q6NUQ4;Q6NUQ4-2	TMEM214	Transmembrane protein 214	15	15	25.8	76.891	687	42.686		-4.52521	-4.23778	-0.287428		3.87315	3.0771	0.278234	+	+	+_+			10	14	14	13	12	13	1	1	0	2325900000		NaN	NaN	NaN	26.6477	27.1792	27.0269	26.9701	27.1208	25.9007		tr|A0A0D9RAN8|A0A0D9RAN8_CHLSB Uncharacterized protein OS=Chlorocebus sabaeus GN=TMEM214 PE=4 SV=1;sp|Q6NUQ4|TM214_HUMAN Transmembrane protein 214 OS=Homo sapiens GN=TMEM214 PE=1 SV=2;sp|Q6NUQ4-2|TM214_HUMAN Isoform 2 of Transmembrane protein 214 OS=Homo s
948	A0A0D9R5Z1;P11172;P11172-3;E9PFD2	UMPS	Uridine 5-monophosphate synthase;Orotate phosphoribosyltransferase;Orotidine 5-phosphate decarboxylase	12	12	40	52.127	480	94.015		-1.87765	-1.69703	-0.180624		2.32172	1.74692	0.180779	+					9	10	10	8	10	11	4	3	5	2306100000		24.9775	25.4718	24.502	26.838	26.5679	27.1785	26.5859	27.3056	26.151		tr|A0A0D9R5Z1|A0A0D9R5Z1_CHLSB Uncharacterized protein OS=Chlorocebus sabaeus GN=UMPS PE=3 SV=1;sp|P11172|UMPS_HUMAN Uridine 5-monophosphate synthase OS=Homo sapiens GN=UMPS PE=1 SV=1;sp|P11172-3|UMPS_HUMAN Isoform 3 of Uridine 5-monophosphate synthase O
1731	A0A0D9RIJ3;A0A0A0MSK5;J3KN66;Q5JTV8;Q5JTV8-3	TOR1AIP1	Torsin-1A-interacting protein 1	16	15	35	67.509	600	54		-2.3198	-2.02043	-0.299369		3.95259	3.20376	0.943516	+	+	+_+			12	11	9	11	10	11	3	3	3	2306000000		24.61	24.9187	24.4046	27.0331	26.9206	26.9391	26.3931	26.8847	26.7169		tr|A0A0D9RIJ3|A0A0D9RIJ3_CHLSB Uncharacterized protein OS=Chlorocebus sabaeus GN=TOR1AIP1 PE=4 SV=1;tr|A0A0A0MSK5|A0A0A0MSK5_HUMAN Torsin-1A-interacting protein 1 OS=Homo sapiens GN=TOR1AIP1 PE=1 SV=1;tr|J3KN66|J3KN66_HUMAN Torsin-1A-interacting protein 1
10	A0A024RCR6;A0A0G2JK23;P46379-2;P46379;P46379-3;A0A0G2JL47;P46379-4;P46379-5	BAT3;BAG6	Large proline-rich protein BAG6	16	16	18.1	118.7	1126	54.52		-3.63545	-3.61468	-0.0207704		1.55505	1.55363	0.0313357	+	+	+_+			11	14	15	14	14	15	2	2	1	2303500000		NaN	NaN	25.2758	27.1108	26.8066	26.5072	27.0621	26.6954	26.6048		tr|A0A024RCR6|A0A024RCR6_HUMAN HLA-B associated transcript 3, isoform CRA_a OS=Homo sapiens GN=BAT3 PE=1 SV=1;tr|A0A0G2JK23|A0A0G2JK23_HUMAN Large proline-rich protein BAG6 OS=Homo sapiens GN=BAG6 PE=1 SV=1;sp|P46379-2|BAG6_HUMAN Isoform 2 of Large proline
3754	O60488-2;O60488;A0A0D9RM87	ACSL4	Long-chain-fatty-acid--CoA ligase 4	21	19	39.3	74.435	670	85.291		-2.64518	-2.30641	-0.338772		2.0168	1.72714	0.41957	+	+	+_+			16	17	14	13	13	17	4	2	1	2297400000		24.391	NaN	25.2184	26.8406	26.7195	27.3595	26.443	27.1907	26.2696		sp|O60488-2|ACSL4_HUMAN Isoform Short of Long-chain-fatty-acid--CoA ligase 4 OS=Homo sapiens GN=ACSL4;sp|O60488|ACSL4_HUMAN Long-chain-fatty-acid--CoA ligase 4 OS=Homo sapiens GN=ACSL4 PE=1 SV=2;tr|A0A0D9RM87|A0A0D9RM87_CHLSB Uncharacterized protein OS=Chl
1059	A0A0D9R7R1;O95470	SGPL1	Sphingosine-1-phosphate lyase 1	12	12	26.6	63.511	568	29.73		-3.72755	-3.81855	0.0909971		3.38072	3.30389	0.0893084	+	+	+_+			9	11	11	9	11	8	2	0	0	2295800000		NaN	NaN	23.468	27.1743	26.7895	26.3494	27.1211	27.149	26.3162		tr|A0A0D9R7R1|A0A0D9R7R1_CHLSB Uncharacterized protein OS=Chlorocebus sabaeus GN=SGPL1 PE=3 SV=1;sp|O95470|SGPL1_HUMAN Sphingosine-1-phosphate lyase 1 OS=Homo sapiens GN=SGPL1 PE=1 SV=3
2894	A0A0D9S262;Q8NCM8;Q8NCM8-2	DYNC2H1	Cytoplasmic dynein 2 heavy chain 1	41	41	10.9	493.04	4311	58.253		-3.96259	-3.37962	-0.582969		4.30222	2.88318	0.619068	+	+	+_+			14	29	34	32	23	34	0	0	1	2286800000		NaN	NaN	NaN	26.8055	27.325	27.17	26.9419	26.8801	25.7296		tr|A0A0D9S262|A0A0D9S262_CHLSB Uncharacterized protein OS=Chlorocebus sabaeus GN=DYNC2H1 PE=4 SV=1;sp|Q8NCM8|DYHC2_HUMAN Cytoplasmic dynein 2 heavy chain 1 OS=Homo sapiens GN=DYNC2H1 PE=1 SV=4;sp|Q8NCM8-2|DYHC2_HUMAN Isoform 2 of Cytoplasmic dynein 2 heavy
1993	A8MUD9;A0A0D9RMB4;P18124	RPL7	60S ribosomal protein L7	9	9	41.8	24.433	208	97.3		0.212454	-0.867807	1.08026		0.135905	0.340373	0.528482						9	5	5	5	3	5	3	3	2	2280400000		26.5468	26.4423	24.807	25.9441	25.6986	25.5161	26.2597	25.5989	28.541		tr|A8MUD9|A8MUD9_HUMAN 60S ribosomal protein L7 OS=Homo sapiens GN=RPL7 PE=1 SV=1;tr|A0A0D9RMB4|A0A0D9RMB4_CHLSB Uncharacterized protein OS=Chlorocebus sabaeus PE=4 SV=1;sp|P18124|RL7_HUMAN 60S ribosomal protein L7 OS=Homo sapiens GN=RPL7 PE=1 SV=1
3021	A0A0D9S4D2;P40937-2;P40937	RFC5	Replication factor C subunit 5	12	12	50.9	38.453	340	105.47		-3.16839	-3.23116	0.0627702		2.37198	2.36534	0.0745981	+	+	+_+			10	9	12	8	11	12	2	1	1	2273800000		NaN	NaN	24.4943	26.9108	26.3708	26.9725	26.3807	26.9233	27.1383		tr|A0A0D9S4D2|A0A0D9S4D2_CHLSB Uncharacterized protein OS=Chlorocebus sabaeus GN=RFC5 PE=4 SV=1;sp|P40937-2|RFC5_HUMAN Isoform 2 of Replication factor C subunit 5 OS=Homo sapiens GN=RFC5;sp|P40937|RFC5_HUMAN Replication factor C subunit 5 OS=Homo sapiens G
322	A0A0D9QWS9	TMEM41B	Uncharacterized protein	2	2	8.6	32.558	291	44.788		-4.06049	-4.03204	-0.0284443		3.91903	3.32562	0.020906	+	+	+_+			1	1	2	2	1	2	1	1	0	2270000000		NaN	NaN	NaN	26.2837	27.0741	27.0336	26.8249	27.3861	26.0951		tr|A0A0D9QWS9|A0A0D9QWS9_CHLSB Uncharacterized protein OS=Chlorocebus sabaeus GN=TMEM41B PE=4 SV=1
852	A0A0D9R4K6;P37108;H0YLA2;A0A0D9SAA5;A0A0D9SAN2	SRP14	Signal recognition particle 14 kDa protein	6	6	56.9	15.219	144	49.676		0.172401	-0.0854359	0.257837		0.334962	0.0686835	0.23774						4	4	4	4	5	5	5	4	5	2269000000		26.5126	26.5202	26.9986	26.7233	26.2474	26.5436	26.0483	26.7935	27.4459		tr|A0A0D9R4K6|A0A0D9R4K6_CHLSB Uncharacterized protein OS=Chlorocebus sabaeus PE=4 SV=1;sp|P37108|SRP14_HUMAN Signal recognition particle 14 kDa protein OS=Homo sapiens GN=SRP14 PE=1 SV=2;tr|H0YLA2|H0YLA2_HUMAN Signal recognition particle 14 kDa protein OS
1391	A0A0D9RD31	NDUFA5	Uncharacterized protein	7	7	59.5	13.292	116	198.55		-1.07365	-0.875344	-0.198304		1.71397	1.23398	0.25094						6	6	6	7	6	6	3	4	4	2263600000		25.4452	26.123	25.5102	26.3996	26.9686	26.9311	26.9229	26.705	26.0765		tr|A0A0D9RD31|A0A0D9RD31_CHLSB Uncharacterized protein OS=Chlorocebus sabaeus GN=NDUFA5 PE=4 SV=1
3999	P67809;A0A0D9S7K7;H0Y449	YBX1	Nuclease-sensitive element-binding protein 1	12	9	53.4	35.924	324	195.64		0.914863	0.594938	0.319925		1.29507	0.664981	0.321003						8	6	4	5	5	6	3	4	5	2256700000		26.7608	27.5489	27.0285	25.778	26.5978	26.2179	25.9898	26.43	27.1336		sp|P67809|YBOX1_HUMAN Nuclease-sensitive element-binding protein 1 OS=Homo sapiens GN=YBX1 PE=1 SV=3;tr|A0A0D9S7K7|A0A0D9S7K7_CHLSB Uncharacterized protein OS=Chlorocebus sabaeus PE=4 SV=1;tr|H0Y449|H0Y449_HUMAN Nuclease-sensitive element-binding protein 1
2600	A0A0D9RX69;F8W7R3	FANCI	Uncharacterized protein	43	16	50.7	134.94	1199	289.02		-4.29975	-3.88093	-0.418817		3.10013	2.79427	0.391769	+	+	+_+			11	12	12	14	14	14	0	0	0	2254300000		NaN	NaN	NaN	26.4401	27.1915	27.3769	26.913	26.9517	25.8874		tr|A0A0D9RX69|A0A0D9RX69_CHLSB Uncharacterized protein OS=Chlorocebus sabaeus GN=FANCI PE=4 SV=1;tr|F8W7R3|F8W7R3_HUMAN Fanconi anemia group I protein OS=Homo sapiens GN=FANCI PE=1 SV=1
3974	P61160;A0A0D9RQK6;P61160-2;F5H6T1	ACTR2	Actin-related protein 2	11	11	40.6	44.76	394	129.84		-1.03243	-1.11339	0.0809619		1.90231	1.49263	0.112971						9	10	10	10	9	8	4	4	3	2250600000		25.8545	25.7125	25.0938	26.6094	26.4851	26.6636	26.1843	26.7686	27.048		sp|P61160|ARP2_HUMAN Actin-related protein 2 OS=Homo sapiens GN=ACTR2 PE=1 SV=1;tr|A0A0D9RQK6|A0A0D9RQK6_CHLSB Uncharacterized protein OS=Chlorocebus sabaeus GN=ACTR2 PE=3 SV=1;sp|P61160-2|ARP2_HUMAN Isoform 2 of Actin-related protein 2 OS=Homo sapiens GN=
271	A0A0D9QVY5;P51665;H3BNT7;H3BTM8	PSMD7	26S proteasome non-ATPase regulatory subunit 7	10	10	49.1	37.011	324	40.947		-2.30516	-2.26199	-0.0431728		2.18033	1.9921	0.0398269	+	+	+_+			8	9	9	9	8	8	1	4	3	2238100000		25.3115	24.4526	NaN	26.5017	27.2333	26.9187	27.4339	26.6415	26.4487		tr|A0A0D9QVY5|A0A0D9QVY5_CHLSB Uncharacterized protein OS=Chlorocebus sabaeus GN=PSMD7 PE=4 SV=1;sp|P51665|PSMD7_HUMAN 26S proteasome non-ATPase regulatory subunit 7 OS=Homo sapiens GN=PSMD7 PE=1 SV=2;tr|H3BNT7|H3BNT7_HUMAN 26S proteasome non-ATPase regula
3288	A0A0D9S8L1;O95140	MFN2	Mitofusin-2	18	16	29.7	86.384	757	64.519		-4.38355	-4.30984	-0.0737089		3.08651	3.03588	0.218778	+	+	+_+			11	12	11	15	13	11	1	1	0	2233700000		NaN	NaN	NaN	27.0327	26.8601	26.7833	26.8281	27.0012	26.6256		tr|A0A0D9S8L1|A0A0D9S8L1_CHLSB Uncharacterized protein OS=Chlorocebus sabaeus GN=MFN2 PE=3 SV=1;sp|O95140|MFN2_HUMAN Mitofusin-2 OS=Homo sapiens GN=MFN2 PE=1 SV=3
1188	A0A0D9R9Q4;P13010	XRCC5	X-ray repair cross-complementing protein 5	18	18	38.7	82.715	732	323.31		-0.394975	-0.979597	0.584622		0.453877	0.534724	0.319739						16	15	15	13	15	15	5	4	3	2231700000		25.966	24.9482	25.9713	25.7738	25.9808	26.3159	25.9379	25.8148	28.0716		tr|A0A0D9R9Q4|A0A0D9R9Q4_CHLSB X-ray repair cross-complementing protein 5 OS=Chlorocebus sabaeus GN=XRCC5 PE=3 SV=1;sp|P13010|XRCC5_HUMAN X-ray repair cross-complementing protein 5 OS=Homo sapiens GN=XRCC5 PE=1 SV=3
1187	A0A0D9R9N9	NUP205	Uncharacterized protein	50	9	44.8	164.22	1450	113.8		-4.00587	-3.8555	-0.150371		2.58914	2.57579	0.326678	+	+	+_+			8	8	8	7	8	6	0	0	0	2229600000		NaN	NaN	NaN	26.5391	26.7543	27.1157	26.7781	26.6937	26.4864		tr|A0A0D9R9N9|A0A0D9R9N9_CHLSB Uncharacterized protein OS=Chlorocebus sabaeus GN=NUP205 PE=4 SV=1
1252	A0A0D9RAU7;Q5VW36;S4R400	FOCAD	Focadhesin	3	3	2.1	200.81	1804	5.0122		-4.58018	-4.19838	-0.3818		4.10372	3.92873	1.27298	+	+	+_+			3	2	2	2	2	3	0	0	0	2224900000		NaN	NaN	NaN	26.8852	27.1033	27.2012	26.7011	26.853	26.4901		tr|A0A0D9RAU7|A0A0D9RAU7_CHLSB Uncharacterized protein OS=Chlorocebus sabaeus GN=FOCAD PE=4 SV=1;sp|Q5VW36|FOCAD_HUMAN Focadhesin OS=Homo sapiens GN=FOCAD PE=1 SV=1;tr|S4R400|S4R400_HUMAN Focadhesin OS=Homo sapiens GN=FOCAD PE=1 SV=2
1178	A0A0D9R9G9;H7BXH2;E9PKF6;Q5H9R7-6;Q5H9R7-2;Q5H9R7;Q5H9R7-5;Q5H9R7-3;Q5H9R7-4;E9PQP7;H0YEN2	PPP6R3	Serine/threonine-protein phosphatase 6 regulatory subunit 3	15	15	22	98.542	879	75.099		-4.72496	-4.79892	0.0739587		3.42172	3.44888	0.304715	+	+	+_+			10	13	13	13	11	13	1	0	1	2221900000		NaN	NaN	NaN	26.8171	26.9018	26.661	26.9621	26.9071	26.7326		tr|A0A0D9R9G9|A0A0D9R9G9_CHLSB Uncharacterized protein OS=Chlorocebus sabaeus GN=PPP6R3 PE=4 SV=1;tr|H7BXH2|H7BXH2_HUMAN Serine/threonine-protein phosphatase 6 regulatory subunit 3 OS=Homo sapiens GN=PPP6R3 PE=1 SV=1;tr|E9PKF6|E9PKF6_HUMAN Serine/threonine
134	A0A0A0MTR7;A0A0A0MTC1;Q63HN8;Q63HN8-4	RNF213	E3 ubiquitin-protein ligase RNF213	65	6	13.6	591.4	5207	23.025		-2.93386	-3.06083	0.126976		4.40693	3.89379	0.307935	+	+	+_+			4	4	5	4	4	4	1	1	2	2217300000		NaN	NaN	NaN	25.6848	25.7115	25.528	25.9878	25.8559	25.4616		tr|A0A0A0MTR7|A0A0A0MTR7_HUMAN E3 ubiquitin-protein ligase RNF213 OS=Homo sapiens GN=RNF213 PE=1 SV=1;tr|A0A0A0MTC1|A0A0A0MTC1_HUMAN E3 ubiquitin-protein ligase RNF213 OS=Homo sapiens GN=RNF213 PE=1 SV=1;sp|Q63HN8|RN213_HUMAN E3 ubiquitin-protein ligase RN
2920	A0A0D9S2I2	ATM	Uncharacterized protein	100	19	42	350.21	3056	323.31		-4.5254	-3.84478	-0.680623		3.9738	3.45746	0.963349	+	+	+_+			12	15	14	17	15	19	0	0	0	2208200000		NaN	NaN	NaN	26.6802	27.3118	27.2534	26.8618	26.3886	25.9531		tr|A0A0D9S2I2|A0A0D9S2I2_CHLSB Uncharacterized protein OS=Chlorocebus sabaeus GN=ATM PE=3 SV=1
3068	A0A0D9S510	HIP1R	Uncharacterized protein	34	11	41.1	118.32	1056	215.78		-4.23352	-4.14614	-0.087375		2.64523	2.65209	0.157422	+	+	+_+			8	9	9	10	7	10	0	0	0	2205400000		NaN	NaN	NaN	26.5181	26.9748	27.0931	26.9267	26.5564	26.8407		tr|A0A0D9S510|A0A0D9S510_CHLSB Uncharacterized protein OS=Chlorocebus sabaeus GN=HIP1R PE=4 SV=1
3941	P49458;E9PE20;P49458-2	SRP9	Signal recognition particle 9 kDa protein	6	6	55.8	10.112	86	23.234		0.295088	0.47151	-0.176421		0.253028	0.458491	0.124388						6	4	4	3	3	5	4	4	4	2200300000		27.0174	27.1349	26.2833	25.7613	26.935	26.8541	25.9298	26.0441	27.0472		sp|P49458|SRP09_HUMAN Signal recognition particle 9 kDa protein OS=Homo sapiens GN=SRP9 PE=1 SV=2;tr|E9PE20|E9PE20_HUMAN Signal recognition particle 9 kDa protein OS=Homo sapiens GN=SRP9 PE=1 SV=1;sp|P49458-2|SRP09_HUMAN Isoform 2 of Signal recognition par
2291	A0A0D9RS75;Q13443;A0AVL1;Q13443-2	ADAM9	Disintegrin and metalloproteinase domain-containing protein 9	13	13	21.6	90.629	819	23.874		-4.2743	-4.09586	-0.178438		2.88904	2.65437	0.274706	+	+	+_+			8	12	10	11	10	11	1	0	0	2199700000		NaN	NaN	NaN	26.7857	26.9212	26.9537	26.984	26.9434	26.1979		tr|A0A0D9RS75|A0A0D9RS75_CHLSB Uncharacterized protein OS=Chlorocebus sabaeus GN=ADAM9 PE=4 SV=1;sp|Q13443|ADAM9_HUMAN Disintegrin and metalloproteinase domain-containing protein 9 OS=Homo sapiens GN=ADAM9 PE=1 SV=1;tr|A0AVL1|A0AVL1_HUMAN ADAM9 protein OS=
3851	P16615;P16615-4;H7C5W9	ATP2A2	Sarcoplasmic/endoplasmic reticulum calcium ATPase 2	39	2	39.3	114.76	1042	1.7689		-4.02357	-2.51071	-1.51286		3.5655	0.757727	0.434825	+					1	2	2	2	2	2	1	1	1	2194900000		NaN	NaN	NaN	27.0139	27.0973	26.8415	26.9542	26.9652	NaN		sp|P16615|AT2A2_HUMAN Sarcoplasmic/endoplasmic reticulum calcium ATPase 2 OS=Homo sapiens GN=ATP2A2 PE=1 SV=1;sp|P16615-4|AT2A2_HUMAN Isoform 4 of Sarcoplasmic/endoplasmic reticulum calcium ATPase 2 OS=Homo sapiens GN=ATP2A2;tr|H7C5W9|H7C5W9_HUMAN Sarcopla
2580	A0A0D9RWW0;Q86SQ4-2;Q86SQ4;Q86SQ4-4;Q86SQ4-3	GPR126	G-protein coupled receptor 126	14	14	15.5	136.6	1220	81.722		-3.80495	-3.73597	-0.0689805		4.71208	3.94219	0.0911057	+	+	+_+			8	14	14	11	12	10	0	0	0	2180300000		NaN	NaN	NaN	26.6699	27.0615	26.6373	26.9877	26.9172	26.2568		tr|A0A0D9RWW0|A0A0D9RWW0_CHLSB Uncharacterized protein OS=Chlorocebus sabaeus GN=ADGRG6 PE=3 SV=1;sp|Q86SQ4-2|GP126_HUMAN Isoform 2 of G-protein coupled receptor 126 OS=Homo sapiens GN=GPR126;sp|Q86SQ4|GP126_HUMAN G-protein coupled receptor 126 OS=Homo sap
3133	A0A0D9S679;O75534-2;O75534;O75534-3;O75534-4;E9PLT0	CSDE1	Cold shock domain-containing protein E1	22	22	28.6	93.741	844	93.77		1.84526	1.16936	0.675898		3.21396	3.43249	1.47094	+					14	11	9	8	10	12	18	17	17	2171000000		27.9216	28.0034	27.9751	26.4155	26.1746	25.7742	26.6733	26.7187	27		tr|A0A0D9S679|A0A0D9S679_CHLSB Uncharacterized protein OS=Chlorocebus sabaeus GN=CSDE1 PE=4 SV=1;sp|O75534-2|CSDE1_HUMAN Isoform 2 of Cold shock domain-containing protein E1 OS=Homo sapiens GN=CSDE1;sp|O75534|CSDE1_HUMAN Cold shock domain-containing protei
2072	A0A0D9RNK4	MYO1C	Uncharacterized protein	52	7	53.2	116.35	1011	323.31		-2.87112	-2.71811	-0.153008		0.963311	0.947378	0.0840146						5	7	6	3	5	7	1	0	2	2167300000		NaN	26.0833	NaN	25.5773	27.3254	26.9378	25.7259	26.8359	26.8197		tr|A0A0D9RNK4|A0A0D9RNK4_CHLSB Uncharacterized protein OS=Chlorocebus sabaeus GN=MYO1C PE=3 SV=1
4056	Q14155-1;Q14155-5;B1ALK7;Q14155-6;E7EUY6	ARHGEF7	Rho guanine nucleotide exchange factor 7	42	3	76.8	73.139	646	323.31		-4.22855	-3.83108	-0.397469		3.0729	3.08987	0.475985	+	+	+_+			2	2	2	2	2	2	0	0	0	2165200000		NaN	NaN	NaN	26.3535	27.1162	27.3256	26.8007	26.6818	26.1204		sp|Q14155-1|ARHG7_HUMAN Isoform 1 of Rho guanine nucleotide exchange factor 7 OS=Homo sapiens GN=ARHGEF7;sp|Q14155-5|ARHG7_HUMAN Isoform 5 of Rho guanine nucleotide exchange factor 7 OS=Homo sapiens GN=ARHGEF7;tr|B1ALK7|B1ALK7_HUMAN Rho guanine nucleotide
886	A0A0D9R4Z6;Q8NBS9;Q8NBS9-2	TXNDC5	Thioredoxin domain-containing protein 5	16	16	51.8	40.809	363	96.984		1.38263	1.26627	0.116358		1.6278	1.58978	0.292963						10	9	11	7	9	10	13	16	15	2163800000		27.7562	28.2989	27.0568	26.5297	26.0385	26.3958	26.309	26.4761	26.528		tr|A0A0D9R4Z6|A0A0D9R4Z6_CHLSB Uncharacterized protein OS=Chlorocebus sabaeus GN=TXNDC5 PE=3 SV=1;sp|Q8NBS9|TXND5_HUMAN Thioredoxin domain-containing protein 5 OS=Homo sapiens GN=TXNDC5 PE=1 SV=2;sp|Q8NBS9-2|TXND5_HUMAN Isoform 2 of Thioredoxin domain-cont
2497	A0A0D9RV94	SLC39A14	Uncharacterized protein	4	2	11.1	37.77	342	3.028		-4.24077	-2.86463	-1.37613		3.05055	0.757695	0.340302	+					1	2	2	2	2	2	0	1	0	2163500000		NaN	NaN	NaN	26.8552	26.9877	26.926	26.8815	27.5344	NaN		tr|A0A0D9RV94|A0A0D9RV94_CHLSB Uncharacterized protein OS=Chlorocebus sabaeus GN=SLC39A14 PE=4 SV=1
3254	A0A0D9S835;Q9Y266	NUDC	Nuclear migration protein nudC	14	14	49.4	38.393	332	213.86		-0.303172	-0.487865	0.184693		0.283362	0.422388	0.103422						8	9	10	7	8	13	5	6	4	2157000000		26.2567	25.9573	26.1622	27.2047	26.3279	25.7532	25.9323	26.3564	27.5512		tr|A0A0D9S835|A0A0D9S835_CHLSB Uncharacterized protein OS=Chlorocebus sabaeus GN=NUDC PE=4 SV=1;sp|Q9Y266|NUDC_HUMAN Nuclear migration protein nudC OS=Homo sapiens GN=NUDC PE=1 SV=1
367	A0A0D9QXK1;P62277;J3KMX5;A0A0D9SA07	RPS13	40S ribosomal protein S13	8	8	45.7	16.142	140	15.338		-0.134214	-0.992259	0.858045		0.298251	0.634747	0.531629						8	6	7	6	6	6	4	4	4	2155500000		26.0313	25.7796	25.6562	25.6754	26.1621	26.0323	26.115	26.1223	28.2066		tr|A0A0D9QXK1|A0A0D9QXK1_CHLSB Uncharacterized protein OS=Chlorocebus sabaeus GN=RPS13 PE=3 SV=1;sp|P62277|RS13_HUMAN 40S ribosomal protein S13 OS=Homo sapiens GN=RPS13 PE=1 SV=2;tr|J3KMX5|J3KMX5_HUMAN 40S ribosomal protein S13 OS=Homo sapiens GN=RPS13 PE=
3613	E9PLL6;P46776;A0A0D9QWP9;E9PJD9	RPL27A	60S ribosomal protein L27a	7	7	49.1	12.201	108	36.828		1.42943	0.13132	1.29811		3.15004	0.0530297	0.685523	+					7	3	6	4	5	3	5	6	3	2154600000		26.7722	26.5716	26.7486	25.5435	25.1182	25.1423	25.7301	25.7017	28.2666		tr|E9PLL6|E9PLL6_HUMAN 60S ribosomal protein L27a OS=Homo sapiens GN=RPL27A PE=1 SV=1;sp|P46776|RL27A_HUMAN 60S ribosomal protein L27a OS=Homo sapiens GN=RPL27A PE=1 SV=2;tr|A0A0D9QWP9|A0A0D9QWP9_CHLSB Uncharacterized protein OS=Chlorocebus sabaeus GN=RPL2
261	A0A0D9QVU1;D6RBW1;P06730;P06730-3;P06730-2;H0Y8J7	EIF4E	Eukaryotic translation initiation factor 4E	6	6	28.1	25.097	217	13.488		0.796001	0.371155	0.424846		0.533508	0.517133	0.284162						6	5	6	4	6	6	5	5	5	2141300000		26.7579	26.9031	27.6917	27.4859	25.5718	25.9069	26.8353	26.9	26.5039		tr|A0A0D9QVU1|A0A0D9QVU1_CHLSB Uncharacterized protein OS=Chlorocebus sabaeus GN=EIF4E PE=3 SV=1;tr|D6RBW1|D6RBW1_HUMAN Eukaryotic translation initiation factor 4E OS=Homo sapiens GN=EIF4E PE=1 SV=1;sp|P06730|IF4E_HUMAN Eukaryotic translation initiation fa
880	A0A0D9R4W7;E9PH05;F8W7Q4;Q96A26	FAM162A	Protein FAM162A	4	4	21.3	17.655	155	70.769		-3.40356	-3.17575	-0.227802		3.22442	2.21653	0.14556	+	+	+_+			3	4	3	2	2	3	0	0	0	2135300000		NaN	NaN	NaN	26.3415	26.9379	27.0625	26.8238	27.3178	25.5168		tr|A0A0D9R4W7|A0A0D9R4W7_CHLSB Uncharacterized protein OS=Chlorocebus sabaeus GN=FAM162A PE=4 SV=1;tr|E9PH05|E9PH05_HUMAN Protein FAM162A OS=Homo sapiens GN=FAM162A PE=1 SV=1;tr|F8W7Q4|F8W7Q4_HUMAN Protein FAM162A OS=Homo sapiens GN=FAM162A PE=1 SV=1;sp|Q9
2930	A0A0D9S2N6;A0A087WVP1;Q14517	FAT1	Protocadherin Fat 1;Protocadherin Fat 1, nuclear form	27	26	7.9	486.55	4410	67.483		-3.69813	-3.77634	0.0782127		2.8427	2.89889	0.0921125	+	+	+_+			13	19	21	20	14	18	1	0	1	2135200000		NaN	NaN	NaN	26.6833	27.054	26.2896	27.0426	26.8669	26.352		tr|A0A0D9S2N6|A0A0D9S2N6_CHLSB Uncharacterized protein OS=Chlorocebus sabaeus GN=FAT1 PE=4 SV=1;tr|A0A087WVP1|A0A087WVP1_HUMAN Protocadherin Fat 1 OS=Homo sapiens GN=FAT1 PE=1 SV=1;sp|Q14517|FAT1_HUMAN Protocadherin Fat 1 OS=Homo sapiens GN=FAT1 PE=1 SV=2
2943	A0A0D9S303;Q9HD42;F8VUA2;F8VVT7;F5H875	CHMP1A	Charged multivesicular body protein 1a	5	5	21.4	21.718	196	9.5303		2.94585	2.64911	0.296744		3.91637	4.00591	0.779039	+	+	+_+			3	4	4	4	3	4	5	5	5	2127300000		28.1144	28.5882	28.3227	25.2515	25.2519	25.6843	25.891	25.5683	25.6187		tr|A0A0D9S303|A0A0D9S303_CHLSB Uncharacterized protein OS=Chlorocebus sabaeus GN=CHMP1A PE=3 SV=1;sp|Q9HD42|CHM1A_HUMAN Charged multivesicular body protein 1a OS=Homo sapiens GN=CHMP1A PE=1 SV=1;tr|F8VUA2|F8VUA2_HUMAN Charged multivesicular body protein 1a
446	A0A0D9QYV4;F5GWV0;F5H4P3;Q6NXE6-2;Q6NXE6	ARMC6	Armadillo repeat-containing protein 6	7	7	25.8	51.44	476	47.816		-4.36764	-4.16061	-0.20703		3.93887	3.88467	1.23955	+	+	+_+			4	7	5	4	5	6	1	1	1	2119400000		NaN	NaN	NaN	26.5683	26.499	26.7253	26.3199	26.4613	26.3903		tr|A0A0D9QYV4|A0A0D9QYV4_CHLSB Uncharacterized protein OS=Chlorocebus sabaeus GN=ARMC6 PE=4 SV=1;tr|F5GWV0|F5GWV0_HUMAN Armadillo repeat-containing protein 6 (Fragment) OS=Homo sapiens GN=ARMC6 PE=1 SV=8;tr|F5H4P3|F5H4P3_HUMAN Armadillo repeat-containing p
933	A0A0D9R5R9;Q5VV42;Q5VV42-2	CDKAL1	Threonylcarbamoyladenosine tRNA methylthiotransferase	15	15	34	64.754	576	53.996		-3.4788	-3.31294	-0.165864		3.27576	2.7643	0.221844	+	+	+_+			10	14	13	11	8	12	2	1	1	2114300000		NaN	NaN	NaN	26.6284	26.7824	26.6206	26.8501	26.7429	25.9409		tr|A0A0D9R5R9|A0A0D9R5R9_CHLSB Uncharacterized protein OS=Chlorocebus sabaeus GN=CDKAL1 PE=4 SV=1;sp|Q5VV42|CDKAL_HUMAN Threonylcarbamoyladenosine tRNA methylthiotransferase OS=Homo sapiens GN=CDKAL1 PE=1 SV=1;sp|Q5VV42-2|CDKAL_HUMAN Isoform 2 of Threonylc
3097	A0A0D9S5M6;Q12905;B4DY09;A0A0D9SCC6	ILF2	Interleukin enhancer-binding factor 2	13	13	45.9	43.017	390	113.53		-1.67487	-3.12044	1.44557		0.951641	0.853627	0.326126						13	8	5	5	7	6	1	1	1	2112100000		NaN	NaN	NaN	23.5786	23.557	25.805	24.1223	24.0715	29.0835		tr|A0A0D9S5M6|A0A0D9S5M6_CHLSB Uncharacterized protein OS=Chlorocebus sabaeus PE=4 SV=1;sp|Q12905|ILF2_HUMAN Interleukin enhancer-binding factor 2 OS=Homo sapiens GN=ILF2 PE=1 SV=2;tr|B4DY09|B4DY09_HUMAN Interleukin enhancer-binding factor 2 OS=Homo sapien
739	A0A0D9R328;P11413;P11413-2;P11413-3;E7EM57;E7EUI8	G6PD	Glucose-6-phosphate 1-dehydrogenase	15	15	33.8	59.253	515	39.331		1.25529	1.08632	0.168969		2.30564	1.69866	0.329064						9	12	12	12	9	11	15	12	13	2108200000		27.3153	27.5736	28.038	26.5151	26.2634	26.3825	26.7933	26.1618	26.7128		tr|A0A0D9R328|A0A0D9R328_CHLSB Glucose-6-phosphate 1-dehydrogenase OS=Chlorocebus sabaeus GN=G6PD PE=3 SV=1;sp|P11413|G6PD_HUMAN Glucose-6-phosphate 1-dehydrogenase OS=Homo sapiens GN=G6PD PE=1 SV=4;sp|P11413-2|G6PD_HUMAN Isoform Long of Glucose-6-phosphat
1551	A0A0D9RFP7	NDUFB10	Uncharacterized protein	8	8	43.8	21.326	178	27.443		-4.38249	-3.96495	-0.41754		3.57879	3.36398	0.825463	+	+	+_+			6	5	5	5	7	4	1	1	1	2108000000		NaN	NaN	NaN	26.6986	27.2172	26.8424	26.7951	26.5244	26.186		tr|A0A0D9RFP7|A0A0D9RFP7_CHLSB Uncharacterized protein OS=Chlorocebus sabaeus GN=NDUFB10 PE=4 SV=1
2733	A0A0D9RZ88;Q9NTI5-2;Q9NTI5	PDS5B	Sister chromatid cohesion protein PDS5 homolog B	21	17	19.1	164.79	1448	244.96		-4.19771	-4.18773	-0.00997607		3.77428	3.76132	0.034216	+	+	+_+			12	15	15	15	12	13	1	0	0	2104900000		NaN	NaN	NaN	26.6839	26.9037	26.739	26.7058	26.6798	26.9111		tr|A0A0D9RZ88|A0A0D9RZ88_CHLSB Uncharacterized protein OS=Chlorocebus sabaeus GN=PDS5B PE=4 SV=1;sp|Q9NTI5-2|PDS5B_HUMAN Isoform 2 of Sister chromatid cohesion protein PDS5 homolog B OS=Homo sapiens GN=PDS5B;sp|Q9NTI5|PDS5B_HUMAN Sister chromatid cohesion
1089	A0A0D9R887;J3KPS0;Q9NXW2;Q9NXW2-2;V9GYN7	DNAJB12	DnaJ homolog subfamily B member 12	9	9	24.1	42.224	377	16.139		-3.58281	-3.30677	-0.276043		4.2521	3.14205	0.398182	+	+	+_+			6	8	9	7	7	9	1	1	1	2091900000		NaN	NaN	NaN	26.8041	26.8819	26.8156	26.6642	27.0023	26.007		tr|A0A0D9R887|A0A0D9R887_CHLSB Uncharacterized protein OS=Chlorocebus sabaeus GN=DNAJB12 PE=4 SV=1;tr|J3KPS0|J3KPS0_HUMAN DnaJ (Hsp40) homolog, subfamily B, member 12, isoform CRA_c OS=Homo sapiens GN=DNAJB12 PE=1 SV=1;sp|Q9NXW2|DJB12_HUMAN DnaJ homolog su
2703	A0A0D9RYS4;A8MU58;F8W950;Q13155	AIMP2	Aminoacyl tRNA synthase complex-interacting multifunctional protein 2	7	7	32.5	35.272	320	89.58		0.231487	0.334792	-0.103306		0.824481	1.13193	0.656925						5	7	7	7	7	7	3	4	4	2086000000		26.4837	26.8026	26.3898	26.3368	26.2599	26.3848	26.1277	26.2064	26.3375		tr|A0A0D9RYS4|A0A0D9RYS4_CHLSB Uncharacterized protein OS=Chlorocebus sabaeus GN=AIMP2 PE=4 SV=1;tr|A8MU58|A8MU58_HUMAN Aminoacyl tRNA synthase complex-interacting multifunctional protein 2 OS=Homo sapiens GN=AIMP2 PE=1 SV=2;tr|F8W950|F8W950_HUMAN Aminoacy
3620	F5GYQ1;P61421;A0A0D9QV75;R4GN72;J3QL14	ATP6V0D1	V-type proton ATPase subunit d 1	11	11	34.4	44.659	392	71.902		-2.70483	-2.48939	-0.215439		1.00891	0.925309	1.05617						6	9	7	8	8	8	2	1	1	2084800000		NaN	NaN	26.3734	26.6757	26.6048	26.4218	26.2458	26.4491	26.3612		tr|F5GYQ1|F5GYQ1_HUMAN V-type proton ATPase subunit d 1 OS=Homo sapiens GN=ATP6V0D1 PE=1 SV=1;sp|P61421|VA0D1_HUMAN V-type proton ATPase subunit d 1 OS=Homo sapiens GN=ATP6V0D1 PE=1 SV=1;tr|A0A0D9QV75|A0A0D9QV75_CHLSB Uncharacterized protein OS=Chlorocebus
3002	A0A0D9S3Y0;E9PKG1;H7C2I1;Q99873-3;Q99873-2;Q99873-4;Q99873;A0A087X1W2;E9PIX6;E9PQ98;E9PNR9;H0YDE4	PRMT1	Protein arginine N-methyltransferase 1	15	15	55.2	35.386	306	41.661		1.6095	1.92832	-0.318818		4.54287	4.70992	1.84551	+	+	+_+			10	10	9	7	9	10	10	11	10	2084200000		27.9231	27.9903	27.7953	26.3731	26.3039	26.2033	26.0151	25.8585	26.0502		tr|A0A0D9S3Y0|A0A0D9S3Y0_CHLSB Uncharacterized protein OS=Chlorocebus sabaeus GN=PRMT1 PE=3 SV=1;tr|E9PKG1|E9PKG1_HUMAN Protein arginine N-methyltransferase 1 OS=Homo sapiens GN=PRMT1 PE=1 SV=1;tr|H7C2I1|H7C2I1_HUMAN Protein arginine N-methyltransferase 1
763	A0A0D9R3B7;K7EPR0;Q6UW68;K7EM09;K7ELQ9	TMEM205	Transmembrane protein 205	5	5	36.5	21.17	189	93.631		-2.73605	-2.77527	0.0392183		2.9592	2.85685	0.0459326	+	+	+_+			3	5	5	4	5	5	1	1	1	2083500000		NaN	NaN	NaN	26.3639	26.9808	26.5317	26.812	26.9621	26.2199		tr|A0A0D9R3B7|A0A0D9R3B7_CHLSB Uncharacterized protein OS=Chlorocebus sabaeus GN=TMEM205 PE=4 SV=1;tr|K7EPR0|K7EPR0_HUMAN Transmembrane protein 205 OS=Homo sapiens GN=TMEM205 PE=1 SV=1;sp|Q6UW68|TM205_HUMAN Transmembrane protein 205 OS=Homo sapiens GN=TMEM
4227	Q96A65	EXOC4	Exocyst complex component 4	28	14	37.4	110.5	974	245.78		-4.24467	-4.09166	-0.153016		4.50013	4.13093	0.472343	+	+	+_+			12	14	11	13	12	14	0	0	0	2077400000		NaN	NaN	NaN	26.7711	26.8778	26.8176	26.908	26.6659	26.4337		sp|Q96A65|EXOC4_HUMAN Exocyst complex component 4 OS=Homo sapiens GN=EXOC4 PE=1 SV=1
2682	A0A0D9RYE7;O14777	NDC80	Kinetochore protein NDC80 homolog	15	15	27.4	73.937	642	91.077		-3.7748	-3.23298	-0.541821		2.06341	1.84304	1.09093	+	+	+_+			9	13	13	13	14	13	2	1	1	2076900000		NaN	NaN	24.1388	27.0005	27.228	26.6175	26.3255	26.6994	26.1957		tr|A0A0D9RYE7|A0A0D9RYE7_CHLSB Uncharacterized protein OS=Chlorocebus sabaeus GN=NDC80 PE=4 SV=1;sp|O14777|NDC80_HUMAN Kinetochore protein NDC80 homolog OS=Homo sapiens GN=NDC80 PE=1 SV=1
2853	A0A0D9S1G0;P61289;P61289-3;P61289-2;K9J957;B3KQ25;K7ESG5;A0A087WTV2;K7ENH2	PSME3	Proteasome activator complex subunit 3	10	10	40.4	30.886	267	72.38		-0.0792662	0.438822	-0.518089		0.205159	0.77594	1.05629						8	7	7	7	7	10	6	6	6	2068300000		26.7067	27.0028	26.5367	26.8282	26.9338	26.7221	26.5706	26.4913	25.8679		tr|A0A0D9S1G0|A0A0D9S1G0_CHLSB Uncharacterized protein OS=Chlorocebus sabaeus GN=PSME3 PE=4 SV=1;sp|P61289|PSME3_HUMAN Proteasome activator complex subunit 3 OS=Homo sapiens GN=PSME3 PE=1 SV=1;sp|P61289-3|PSME3_HUMAN Isoform 3 of Proteasome activator compl
2257	A0A0D9RRP5;Q9BYG5;Q9BYG5-2	PARD6B	Partitioning defective 6 homolog beta	13	9	41.7	41.053	372	94.266		-4.04876	-4.38303	0.33427		3.57085	3.81513	0.334312	+	+	+_+			9	8	8	7	7	9	0	0	0	2062900000		NaN	NaN	NaN	27.0273	26.0617	26.1883	26.932	27.1353	26.2128		tr|A0A0D9RRP5|A0A0D9RRP5_CHLSB Uncharacterized protein OS=Chlorocebus sabaeus GN=PARD6B PE=4 SV=1;sp|Q9BYG5|PAR6B_HUMAN Partitioning defective 6 homolog beta OS=Homo sapiens GN=PARD6B PE=1 SV=1;sp|Q9BYG5-2|PAR6B_HUMAN Isoform 2 of Partitioning defective 6
644	A0A0D9R1Q7;Q9UMS4;F5GY56	PRPF19	Pre-mRNA-processing factor 19	17	17	52	55.18	504	212.03		-1.62476	-3.23771	1.61295		1.53035	0.815687	0.355423						17	7	5	7	4	7	3	2	1	2058000000		22.175	NaN	22.0807	24.3011	24.4418	22.9873	23.1001	24.3574	29.1115		tr|A0A0D9R1Q7|A0A0D9R1Q7_CHLSB Uncharacterized protein OS=Chlorocebus sabaeus GN=PRPF19 PE=4 SV=1;sp|Q9UMS4|PRP19_HUMAN Pre-mRNA-processing factor 19 OS=Homo sapiens GN=PRPF19 PE=1 SV=1;tr|F5GY56|F5GY56_HUMAN Pre-mRNA-processing factor 19 (Fragment) OS=Hom
2201	A0A0D9RQM6;Q16576;E9PC52;Q16576-2;Q5JP01	RBBP7	Histone-binding protein RBBP7	15	8	55.5	47.82	425	288.84		-0.276642	-0.32226	0.0456181		0.446599	0.464295	0.0855483						7	7	7	6	7	6	2	3	3	2055100000		26.455	26.2453	25.6217	26.4926	26.4565	26.2028	26.3475	26.1927	26.7486		tr|A0A0D9RQM6|A0A0D9RQM6_CHLSB Uncharacterized protein OS=Chlorocebus sabaeus GN=RBBP7 PE=4 SV=1;sp|Q16576|RBBP7_HUMAN Histone-binding protein RBBP7 OS=Homo sapiens GN=RBBP7 PE=1 SV=1;tr|E9PC52|E9PC52_HUMAN Histone-binding protein RBBP7 OS=Homo sapiens GN=
4189	Q8NBU5;Q8NBU5-2	ATAD1	ATPase family AAA domain-containing protein 1	11	11	39.1	40.744	361	246.73		-4.15794	-4.14735	-0.0105902		3.20901	3.1349	0.00885302	+	+	+_+			9	10	11	11	11	10	1	0	1	2053300000		NaN	NaN	NaN	26.127	26.8953	26.9393	27.0062	26.8583	26.0653		sp|Q8NBU5|ATAD1_HUMAN ATPase family AAA domain-containing protein 1 OS=Homo sapiens GN=ATAD1 PE=1 SV=1;sp|Q8NBU5-2|ATAD1_HUMAN Isoform 2 of ATPase family AAA domain-containing protein 1 OS=Homo sapiens GN=ATAD1
3231	A0A0D9S7T9;Q9UBB6-2;Q9UBB6;Q9UBB6-3;C9J5H8	NCDN	Neurochondrin	18	18	35.1	78.833	729	84.568		-3.96666	-3.57303	-0.393621		3.77963	3.59841	1.91248	+	+	+_+			14	17	13	13	15	15	0	0	0	2052600000		NaN	NaN	NaN	27.0527	26.9017	26.8413	26.5584	26.64	26.4164		tr|A0A0D9S7T9|A0A0D9S7T9_CHLSB Uncharacterized protein OS=Chlorocebus sabaeus GN=NCDN PE=4 SV=1;sp|Q9UBB6-2|NCDN_HUMAN Isoform 2 of Neurochondrin OS=Homo sapiens GN=NCDN;sp|Q9UBB6|NCDN_HUMAN Neurochondrin OS=Homo sapiens GN=NCDN PE=1 SV=1;sp|Q9UBB6-3|NCDN_
1033	A0A0D9R7B0;P15170-2;P15170-3;P15170;H3BR35;A0A0D9SAH6;Q8IYD1	GSPT1;GSPT2	Eukaryotic peptide chain release factor GTP-binding subunit ERF3A;Eukaryotic peptide chain release factor GTP-binding subunit ERF3B	13	13	24.9	68.683	639	37.487		0.988312	1.27559	-0.287273		2.01542	3.62173	0.621818		+				6	9	6	7	9	9	9	10	9	2041900000		27.5502	27.418	27.2766	26.7369	26.4825	26.0605	26.0918	26.058	26.2682		tr|A0A0D9R7B0|A0A0D9R7B0_CHLSB Uncharacterized protein OS=Chlorocebus sabaeus GN=GSPT1 PE=4 SV=1;sp|P15170-2|ERF3A_HUMAN Isoform 2 of Eukaryotic peptide chain release factor GTP-binding subunit ERF3A OS=Homo sapiens GN=GSPT1;sp|P15170-3|ERF3A_HUMAN Isoform
3387	A0A0D9SBC7	TMEM177	Uncharacterized protein	5	5	22.2	33.845	311	25.372		-3.71588	-3.98006	0.264175		3.2194	3.24553	0.497967	+	+	+_+			5	4	4	4	5	5	1	0	1	2038900000		NaN	NaN	NaN	26.4427	26.8127	26.3699	27.0632	26.9117	26.443		tr|A0A0D9SBC7|A0A0D9SBC7_CHLSB Uncharacterized protein OS=Chlorocebus sabaeus GN=TMEM177 PE=4 SV=1
3123	A0A0D9S602;H0YLP6;H0YMF4;H0YKD8;P46779-4;P46779-5;P46779;P46779-2;P46779-3;A0A0D9SAS2	RPL28	60S ribosomal protein L28	7	7	40.9	15.715	137	11.606		-3.15115	-3.91681	0.765666		2.53612	2.05766	0.459832	+	+	+_+			6	4	5	4	4	3	1	2	1	2032100000		NaN	NaN	NaN	25.8771	26.3901	25.7188	26.1075	26.0356	28.1399		tr|A0A0D9S602|A0A0D9S602_CHLSB Uncharacterized protein OS=Chlorocebus sabaeus GN=RPL28 PE=4 SV=1;tr|H0YLP6|H0YLP6_HUMAN 60S ribosomal protein L28 OS=Homo sapiens GN=RPL28 PE=1 SV=1;tr|H0YMF4|H0YMF4_HUMAN 60S ribosomal protein L28 OS=Homo sapiens GN=RPL28 P
1009	A0A0D9R703	APOB	Uncharacterized protein	11	3	2.5	515.62	4555	8.7837		-3.88691	-2.02455	-1.86236		3.33881	0.496308	0.458711	+					1	2	2	2	2	2	2	2	2	2030600000		NaN	NaN	NaN	26.4067	26.3167	26.7646	26.0445	26.6963	NaN		tr|A0A0D9R703|A0A0D9R703_CHLSB Uncharacterized protein OS=Chlorocebus sabaeus GN=APOB PE=4 SV=1
2997	A0A0D9S3V5;A0A075B6F9;Q9Y314;M0R3B2	NOSIP	Nitric oxide synthase-interacting protein	11	11	47.9	37.332	338	87.093		1.5517	1.1205	0.431205		3.08983	2.2222	0.96174	+					9	7	8	5	6	8	8	10	10	2030300000		27.4186	27.8034	27.4653	26.1777	25.7774	26.0771	26.6065	26.0978	26.6214		tr|A0A0D9S3V5|A0A0D9S3V5_CHLSB Nitric oxide synthase-interacting protein OS=Chlorocebus sabaeus GN=NOSIP PE=3 SV=1;tr|A0A075B6F9|A0A075B6F9_HUMAN Nitric oxide synthase-interacting protein OS=Homo sapiens GN=NOSIP PE=1 SV=1;sp|Q9Y314|NOSIP_HUMAN Nitric oxid
476	A0A0D9QZA2;P49902;P49902-2;Q5JUV4	NT5C2	Cytosolic purine 5-nucleotidase	16	16	34.1	65.866	569	60.943		0.996186	0.988632	0.00755437		0.975328	1.26115	0.00553567						12	11	12	9	10	11	11	10	8	2029700000		27.0144	27.2261	27.9603	27.1436	26.2092	25.8595	26.5255	25.9676	26.7417		tr|A0A0D9QZA2|A0A0D9QZA2_CHLSB Uncharacterized protein OS=Chlorocebus sabaeus GN=NT5C2 PE=4 SV=1;sp|P49902|5NTC_HUMAN Cytosolic purine 5-nucleotidase OS=Homo sapiens GN=NT5C2 PE=1 SV=1;sp|P49902-2|5NTC_HUMAN Isoform 2 of Cytosolic purine 5-nucleotidase O
3181	A0A0D9S713;Q8NC51-4;Q8NC51-3;Q8NC51-2;Q8NC51	SERBP1	Plasminogen activator inhibitor 1 RNA-binding protein	8	8	31.3	43.135	393	191.53		1.62509	1.73304	-0.107946		2.06647	1.72458	0.0932079	+					5	6	6	6	5	5	5	5	5	2020000000		27.2895	27.4323	28.1721	25.6217	26.2823	26.1145	25.8154	25.3157	26.5637		tr|A0A0D9S713|A0A0D9S713_CHLSB Uncharacterized protein OS=Chlorocebus sabaeus GN=SERBP1 PE=4 SV=1;sp|Q8NC51-4|PAIRB_HUMAN Isoform 4 of Plasminogen activator inhibitor 1 RNA-binding protein OS=Homo sapiens GN=SERBP1;sp|Q8NC51-3|PAIRB_HUMAN Isoform 3 of Plas
4287	Q9NRG9;Q9NRG9-2;F8VZ44;H3BU82	AAAS	Aladin	12	8	30	59.573	546	105.48		-4.4622	-4.51749	0.0552832		4.38656	4.37479	0.157641	+	+	+_+			7	6	7	5	6	6	1	1	1	2019000000		NaN	NaN	NaN	26.5735	26.8377	26.5787	26.6007	26.9138	26.6413		sp|Q9NRG9|AAAS_HUMAN Aladin OS=Homo sapiens GN=AAAS PE=1 SV=1;sp|Q9NRG9-2|AAAS_HUMAN Isoform 2 of Aladin OS=Homo sapiens GN=AAAS;tr|F8VZ44|F8VZ44_HUMAN Aladin OS=Homo sapiens GN=AAAS PE=1 SV=1;tr|H3BU82|H3BU82_HUMAN Aladin (Fragment) OS=Homo sapiens GN=AAA
3340	A0A0D9S9U5;Q15388	TOMM20	Mitochondrial import receptor subunit TOM20 homolog	4	4	32.4	16.45	145	42.134		-4.20673	-4.12874	-0.0779889		2.82413	2.98528	0.0435201	+	+	+_+			3	3	4	4	3	4	0	0	1	2015900000		NaN	NaN	NaN	25.6726	27.2602	26.7247	26.7676	26.9639	25.692		tr|A0A0D9S9U5|A0A0D9S9U5_CHLSB Uncharacterized protein OS=Chlorocebus sabaeus GN=TOMM20 PE=3 SV=1;sp|Q15388|TOM20_HUMAN Mitochondrial import receptor subunit TOM20 homolog OS=Homo sapiens GN=TOMM20 PE=1 SV=1
4064	Q14683;G8JLG1;A0A0D9RJF7	SMC1A	Structural maintenance of chromosomes protein 1A;Structural maintenance of chromosomes protein	25	25	24	143.23	1233	124.55		0.358864	-1.86225	2.22111		0.401569	0.323616	0.398507						25	4	5	3	6	5	0	0	1	2010000000		NaN	NaN	NaN	22.6696	21.889	22.5623	21.949	22.5642	29.2711		sp|Q14683|SMC1A_HUMAN Structural maintenance of chromosomes protein 1A OS=Homo sapiens GN=SMC1A PE=1 SV=2;tr|G8JLG1|G8JLG1_HUMAN Structural maintenance of chromosomes protein OS=Homo sapiens GN=SMC1A PE=1 SV=2;tr|A0A0D9RJF7|A0A0D9RJF7_CHLSB Uncharacterized
1658	H3BQQ9;A0A0D9RH83;B0QYN7;P63279;H3BPC4	UBE2I	SUMO-conjugating enzyme UBC9	6	6	54.7	15.516	137	15.777		-2.21047	-2.85904	0.648575		0.915634	1.20441	1.29243		+				3	5	6	4	5	4	2	1	1	2009200000		NaN	NaN	26.1306	26.3848	26.2592	25.726	27.0132	26.6546	26.6479		tr|H3BQQ9|H3BQQ9_HUMAN SUMO-conjugating enzyme (Fragment) OS=Homo sapiens GN=UBE2I PE=1 SV=1;tr|A0A0D9RH83|A0A0D9RH83_CHLSB SUMO-conjugating enzyme OS=Chlorocebus sabaeus GN=UBE2I PE=3 SV=1;tr|B0QYN7|B0QYN7_HUMAN SUMO-conjugating enzyme OS=Homo sapiens GN=
1499	A0A0D9RET3;P47755;F8W9N7;A0A0D9SET8;C9JUG7;P47755-2	CAPZA2	F-actin-capping protein subunit alpha-2	14	11	64.7	32.949	286	219.4		1.84029	1.66322	0.177073		3.48763	3.17981	0.427498	+	+	+_+			8	5	10	6	6	10	9	10	8	2008100000		27.7834	28.1099	27.7749	26.262	25.8638	26.0216	26.4938	26.0845	26.1003		tr|A0A0D9RET3|A0A0D9RET3_CHLSB Uncharacterized protein OS=Chlorocebus sabaeus GN=CAPZA2 PE=3 SV=1;sp|P47755|CAZA2_HUMAN F-actin-capping protein subunit alpha-2 OS=Homo sapiens GN=CAPZA2 PE=1 SV=3;tr|F8W9N7|F8W9N7_HUMAN F-actin-capping protein subunit alpha
2891	A0A0D9S247;P51148;P51148-2;K7ERI8;K7ERQ8;F8VVK3;K7ENY4	RAB5C	Ras-related protein Rab-5C	10	7	55.7	27.753	255	53.025		-2.09529	-1.53312	-0.562163		2.6453	2.30872	1.37818	+	+	+_+			4	5	5	6	4	5	3	3	3	1996400000		24.257	24.4471	25.0965	26.377	26.795	26.9144	26.3259	26.0728	26.0012		tr|A0A0D9S247|A0A0D9S247_CHLSB Uncharacterized protein OS=Chlorocebus sabaeus GN=RAB5C PE=4 SV=1;sp|P51148|RAB5C_HUMAN Ras-related protein Rab-5C OS=Homo sapiens GN=RAB5C PE=1 SV=2;sp|P51148-2|RAB5C_HUMAN Isoform 2 of Ras-related protein Rab-5C OS=Homo sap
2101	A0A0D9RP44;P41240	CSK	Tyrosine-protein kinase CSK	14	14	35.3	50.704	450	192.76		2.08711	2.25817	-0.171064		3.06028	3.54232	0.37364	+	+	+_+			6	8	9	8	7	7	13	10	12	1992600000		28.1309	27.8119	28.3793	26.3397	25.9415	25.7797	25.9295	25.9593	25.659		tr|A0A0D9RP44|A0A0D9RP44_CHLSB Tyrosine-protein kinase OS=Chlorocebus sabaeus GN=CSK PE=3 SV=1;sp|P41240|CSK_HUMAN Tyrosine-protein kinase CSK OS=Homo sapiens GN=CSK PE=1 SV=1
4338	Q9Y224;G3V4C6	C14orf166	UPF0568 protein C14orf166	11	11	55.7	28.068	244	124.74		0.678497	-0.0325782	0.711075		2.21475	0.0343812	1.00372						11	8	8	6	4	8	8	7	6	1990000000		26.7928	26.5674	26.6606	25.8739	25.8964	26.215	26.3296	26.4601	27.3288		sp|Q9Y224|CN166_HUMAN UPF0568 protein C14orf166 OS=Homo sapiens GN=C14orf166 PE=1 SV=1;tr|G3V4C6|G3V4C6_HUMAN UPF0568 protein C14orf166 OS=Homo sapiens GN=C14orf166 PE=1 SV=1
3891	P30519;A0A087WT44;P30519-2;I3L159;I3L1F5;I3L276;I3L4P8;A0A1B0GXH0;I3L463	HMOX2	Heme oxygenase 2	12	12	49.1	36.032	316	119.45		-4.19038	-3.84375	-0.346629		4.05361	3.79369	1.61643	+	+	+_+			8	11	9	8	11	12	0	0	0	1989100000		NaN	NaN	NaN	26.8782	26.8583	26.8643	26.4367	26.4086	26.7156		sp|P30519|HMOX2_HUMAN Heme oxygenase 2 OS=Homo sapiens GN=HMOX2 PE=1 SV=2;tr|A0A087WT44|A0A087WT44_HUMAN Heme oxygenase 2 OS=Homo sapiens GN=HMOX2 PE=1 SV=1;sp|P30519-2|HMOX2_HUMAN Isoform 2 of Heme oxygenase 2 OS=Homo sapiens GN=HMOX2;tr|I3L159|I3L159_HUM
435	A0A0D9QYP0;Q9UQE7	SMC3	Structural maintenance of chromosomes protein 3	25	25	22.1	141.53	1217	224.88		-2.6987	-2.92549	0.226788		1.12411	1.05299	0.096828	+					22	9	10	14	13	13	2	1	0	1988000000		NaN	NaN	25.6493	26.9466	26.0146	25.7194	25.7289	25.6739	27.9581		tr|A0A0D9QYP0|A0A0D9QYP0_CHLSB Structural maintenance of chromosomes protein OS=Chlorocebus sabaeus GN=SMC3 PE=3 SV=1;sp|Q9UQE7|SMC3_HUMAN Structural maintenance of chromosomes protein 3 OS=Homo sapiens GN=SMC3 PE=1 SV=2
2674	A0A0D9RYB0;Q8N201	INTS1	Integrator complex subunit 1	30	30	20.9	244.18	2190	127.79		-3.94113	-3.96047	0.0193405		4.43416	4.72367	0.059143	+	+	+_+			23	23	22	17	20	23	1	1	1	1987100000		NaN	NaN	NaN	26.881	26.5108	26.637	26.7557	26.6842	26.6469		tr|A0A0D9RYB0|A0A0D9RYB0_CHLSB Uncharacterized protein OS=Chlorocebus sabaeus GN=INTS1 PE=4 SV=1;sp|Q8N201|INT1_HUMAN Integrator complex subunit 1 OS=Homo sapiens GN=INTS1 PE=1 SV=2
4169	Q86Y56;Q86Y56-2	DNAAF5	Dynein assembly factor 5, axonemal	22	5	28.2	93.52	855	18.183		-4.1528	-3.72561	-0.427193		3.30653	2.97207	0.90375	+	+	+_+			5	5	3	4	4	5	0	0	0	1985600000		NaN	NaN	NaN	26.9762	26.772	26.6687	26.4631	26.6768	25.9954		sp|Q86Y56|DAAF5_HUMAN Dynein assembly factor 5, axonemal OS=Homo sapiens GN=DNAAF5 PE=1 SV=4;sp|Q86Y56-2|DAAF5_HUMAN Isoform 2 of Dynein assembly factor 5, axonemal OS=Homo sapiens GN=DNAAF5
4208	Q8WUM0	NUP133	Nuclear pore complex protein Nup133	17	17	18.7	128.98	1156	93.597		-2.93496	-3.34706	0.412099		1.30291	1.48937	0.858221	+	+	+_+			15	14	16	12	11	10	0	0	2	1983100000		NaN	25.4018	NaN	26.0023	26.291	26.6947	26.6118	26.6802	26.9324		sp|Q8WUM0|NU133_HUMAN Nuclear pore complex protein Nup133 OS=Homo sapiens GN=NUP133 PE=1 SV=2
2159	A0A0D9RQ07;Q70CQ2;Q70CQ2-3;Q70CQ2-2	USP34	Ubiquitin carboxyl-terminal hydrolase 34	33	33	12.6	404.1	3546	151.54		-4.10681	-3.91169	-0.195125		4.55129	3.91011	0.422614	+	+	+_+			15	27	25	23	19	24	2	1	2	1980800000		NaN	NaN	NaN	26.5961	26.7706	26.6585	26.6306	26.7071	26.1021		tr|A0A0D9RQ07|A0A0D9RQ07_CHLSB Uncharacterized protein OS=Chlorocebus sabaeus GN=USP34 PE=3 SV=1;sp|Q70CQ2|UBP34_HUMAN Ubiquitin carboxyl-terminal hydrolase 34 OS=Homo sapiens GN=USP34 PE=1 SV=2;sp|Q70CQ2-3|UBP34_HUMAN Isoform 3 of Ubiquitin carboxyl-termi
911	A0A0D9R5E6;P31942-2;P31942;P31942-3;P31942-4	HNRNPH3	Heterogeneous nuclear ribonucleoprotein H3	10	8	37.6	36.926	346	176.01		-0.864131	-3.65076	2.78663		0.635705	1.16598	0.812094		+				8	4	3	4	3	2	0	0	0	1979200000		NaN	NaN	NaN	NaN	24.4992	22.9005	24.5506	24.7073	29.0327		tr|A0A0D9R5E6|A0A0D9R5E6_CHLSB Uncharacterized protein OS=Chlorocebus sabaeus GN=HNRNPH3 PE=4 SV=1;sp|P31942-2|HNRH3_HUMAN Isoform 2 of Heterogeneous nuclear ribonucleoprotein H3 OS=Homo sapiens GN=HNRNPH3;sp|P31942|HNRH3_HUMAN Heterogeneous nuclear ribonu
1997	A0A0D9RME5;O00743;O00743-3;O00743-2	PPP6C	Serine/threonine-protein phosphatase 6 catalytic subunit;Serine/threonine-protein phosphatase 6 catalytic subunit, N-terminally processed	12	12	45.9	35.144	305	27.43		-4.02141	-3.90032	-0.12109		2.69035	2.30547	0.0988555	+	+	+_+			6	11	9	7	6	8	1	0	1	1966800000		NaN	NaN	NaN	26.7903	26.3893	26.6547	26.9847	26.838	25.6484		tr|A0A0D9RME5|A0A0D9RME5_CHLSB Serine/threonine-protein phosphatase OS=Chlorocebus sabaeus GN=PPP6C PE=3 SV=1;sp|O00743|PPP6_HUMAN Serine/threonine-protein phosphatase 6 catalytic subunit OS=Homo sapiens GN=PPP6C PE=1 SV=1;sp|O00743-3|PPP6_HUMAN Isoform 3
1105	A0A0D9R8F5;Q9UG56;H0Y7P7;Q9UG56-2	PISD	Phosphatidylserine decarboxylase proenzyme;Phosphatidylserine decarboxylase alpha chain;Phosphatidylserine decarboxylase beta chain	14	14	41.6	46.909	409	34.757		-1.49505	-1.93876	0.44371		0.752075	1.01345	0.888096						9	13	12	10	9	9	2	1	3	1966200000		NaN	25.511	25.5805	25.7464	26.3833	26.3219	26.4158	26.5597	26.8072		tr|A0A0D9R8F5|A0A0D9R8F5_CHLSB Phosphatidylserine decarboxylase proenzyme, mitochondrial OS=Chlorocebus sabaeus GN=PISD PE=3 SV=1;sp|Q9UG56|PISD_HUMAN Phosphatidylserine decarboxylase proenzyme, mitochondrial OS=Homo sapiens GN=PISD PE=2 SV=4;tr|H0Y7P7|H0Y
1818	A0A0D9RJR1;Q99442;F8WF48;F8WCJ7	SEC62	Translocation protein SEC62	7	7	9	45.885	399	21.141		-4.12055	-3.82652	-0.294022		2.81684	2.7261	0.237704	+	+	+_+			6	6	6	5	5	6	0	1	0	1961800000		NaN	NaN	NaN	26.0124	27.2304	26.6578	26.8208	26.5065	25.6913		tr|A0A0D9RJR1|A0A0D9RJR1_CHLSB Uncharacterized protein OS=Chlorocebus sabaeus GN=SEC62 PE=4 SV=1;sp|Q99442|SEC62_HUMAN Translocation protein SEC62 OS=Homo sapiens GN=SEC62 PE=1 SV=1;tr|F8WF48|F8WF48_HUMAN Translocation protein SEC62 OS=Homo sapiens GN=SEC6
3648	F8WDZ3;Q96FZ5-2;Q96FZ5	CMTM7	CKLF-like MARVEL transmembrane domain-containing protein 7	2	2	9.9	16.172	151	5.0807		-4.80825	-2.7532	-2.05505		4.82248	0.716068	0.513259	+					1	2	2	2	2	2	0	0	0	1953600000		NaN	NaN	NaN	26.83	27.2471	27.0969	26.4583	27.0342	NaN		tr|F8WDZ3|F8WDZ3_HUMAN CKLF-like MARVEL transmembrane domain-containing protein 7 OS=Homo sapiens GN=CMTM7 PE=1 SV=1;sp|Q96FZ5-2|CKLF7_HUMAN Isoform 2 of CKLF-like MARVEL transmembrane domain-containing protein 7 OS=Homo sapiens GN=CMTM7;sp|Q96FZ5|CKLF7_HU
263	A0A0D9QVU6;H3BQV3;Q96MW5	COG8	Conserved oligomeric Golgi complex subunit 8	12	12	20.5	71.981	645	83.381		-3.76784	-3.26726	-0.500587		4.4617	3.8823	1.25693	+	+	+_+			8	10	11	8	8	8	0	0	0	1952400000		NaN	NaN	NaN	27.0298	26.9102	26.7	26.3094	26.6851	26.1437		tr|A0A0D9QVU6|A0A0D9QVU6_CHLSB Uncharacterized protein OS=Chlorocebus sabaeus PE=4 SV=1;tr|H3BQV3|H3BQV3_HUMAN Conserved oligomeric Golgi complex subunit 8 OS=Homo sapiens GN=COG8 PE=1 SV=1;sp|Q96MW5|COG8_HUMAN Conserved oligomeric Golgi complex subunit 8
2668	A0A0D9RY84;Q99747;Q99747-2	NAPG	Gamma-soluble NSF attachment protein	8	8	26	34.746	312	31.707		-2.95378	-2.65682	-0.296958		1.35914	1.22242	0.267713	+					6	8	6	8	7	7	1	2	2	1951600000		24.6565	24.6788	NaN	27.1556	26.1037	26.6988	26.3285	26.9275	25.8112		tr|A0A0D9RY84|A0A0D9RY84_CHLSB Uncharacterized protein OS=Chlorocebus sabaeus GN=NAPG PE=4 SV=1;sp|Q99747|SNAG_HUMAN Gamma-soluble NSF attachment protein OS=Homo sapiens GN=NAPG PE=1 SV=1;sp|Q99747-2|SNAG_HUMAN Isoform 2 of Gamma-soluble NSF attachment pro
2856	A0A0D9S1K1;P53367;P53367-2	ARFIP1	Arfaptin-1	11	10	44	41.689	373	175.01		-3.43135	-2.79551	-0.635838		1.26221	1.03971	1.56794	+					7	9	8	9	10	10	1	1	3	1950100000		NaN	25.8585	NaN	27.1181	26.4994	26.6816	26.1958	26.1068	26.0892		tr|A0A0D9S1K1|A0A0D9S1K1_CHLSB Uncharacterized protein OS=Chlorocebus sabaeus GN=ARFIP1 PE=4 SV=1;sp|P53367|ARFP1_HUMAN Arfaptin-1 OS=Homo sapiens GN=ARFIP1 PE=1 SV=2;sp|P53367-2|ARFP1_HUMAN Isoform A of Arfaptin-1 OS=Homo sapiens GN=ARFIP1
2616	A0A0D9RXG5;Q96BN8	OTULIN	Ubiquitin thioesterase otulin	12	11	35.8	40.158	352	24.976		-3.63432	-3.24287	-0.391453		2.49289	2.2117	0.682342	+	+	+_+			7	9	9	9	9	8	0	0	0	1943800000		NaN	NaN	NaN	26.9558	26.8751	26.6022	26.612	26.7002	25.9466		tr|A0A0D9RXG5|A0A0D9RXG5_CHLSB Uncharacterized protein OS=Chlorocebus sabaeus GN=OTULIN PE=4 SV=1;sp|Q96BN8|OTUL_HUMAN Ubiquitin thioesterase otulin OS=Homo sapiens GN=OTULIN PE=1 SV=3
210	A0A0D9QV40;Q58EX7-2;Q58EX7	PLEKHG4	Puratrophin-1	30	28	32.4	131.23	1193	79.867	678	-3.13508	-3.13631	0.00123851		3.74819	4.05522	0.00257853	+	+	+_+			23	20	20	17	22	23	2	0	0	1942900000		NaN	NaN	NaN	26.8914	26.3969	26.6078	26.6024	26.5412	26.7562		tr|A0A0D9QV40|A0A0D9QV40_CHLSB Uncharacterized protein OS=Chlorocebus sabaeus GN=PLEKHG4 PE=4 SV=1;sp|Q58EX7-2|PKHG4_HUMAN Isoform 2 of Puratrophin-1 OS=Homo sapiens GN=PLEKHG4;sp|Q58EX7|PKHG4_HUMAN Puratrophin-1 OS=Homo sapiens GN=PLEKHG4 PE=1 SV=1
332	A0A0D9QX32;D3DQV9;P78344;H0Y3P2;P78344-2;H0YCH5	EIF4G2	Eukaryotic translation initiation factor 4 gamma 2	20	20	25.7	110.16	980	47.13		-1.58452	-1.61679	0.0322647		2.7654	1.79947	0.0240251	+					17	15	13	16	17	16	4	3	2	1934200000		24.9431	24.796	24.7898	26.8238	26.3274	26.1312	25.9456	26.1882	27.2455		tr|A0A0D9QX32|A0A0D9QX32_CHLSB Uncharacterized protein OS=Chlorocebus sabaeus GN=EIF4G2 PE=4 SV=1;tr|D3DQV9|D3DQV9_HUMAN Eukaryotic translation initiation factor 4 gamma 2 (Fragment) OS=Homo sapiens GN=EIF4G2 PE=1 SV=1;sp|P78344|IF4G2_HUMAN Eukaryotic tran
3720	MAD004;Q9Y696;A0A0D9S873	CLIC4	Chloride intracellular channel protein 4	12	12	37.4	55.064	479	255.79		1.47554	0.876751	0.598784		1.85736	0.884798	0.562824						11	8	6	5	9	9	8	6	4	1933200000		26.9952	27.2753	27.8109	25.8188	26.3633	25.4727	26.1302	26.049	27.272		in|MAD004|MAD004_R20 GST_CLIC4 in GEX-2T (CLIC4_ NM_013943);sp|Q9Y696|CLIC4_HUMAN Chloride intracellular channel protein 4 OS=Homo sapiens GN=CLIC4 PE=1 SV=4;tr|A0A0D9S873|A0A0D9S873_CHLSB Chloride intracellular channel protein OS=Chlorocebus sabaeus GN=CL
33	A0A0D9REG0;A0A087WU53;Q9H0U3;Q9H0U3-2	MAGT1	Magnesium transporter protein 1	4	4	11.2	35.481	312	7.7363		-3.80568	-3.58763	-0.218054		3.91032	4.03679	0.693656	+	+	+_+			3	4	4	3	3	4	1	0	1	1927000000		NaN	NaN	NaN	26.6167	26.9883	26.5604	26.4657	26.6026	26.4429		tr|A0A0D9REG0|A0A0D9REG0_CHLSB Uncharacterized protein OS=Chlorocebus sabaeus GN=MAGT1 PE=4 SV=1;tr|A0A087WU53|A0A087WU53_HUMAN Magnesium transporter protein 1 OS=Homo sapiens GN=MAGT1 PE=1 SV=1;sp|Q9H0U3|MAGT1_HUMAN Magnesium transporter protein 1 OS=Homo
4268	Q9H0U4;E9PLD0;A0A0D9R716;Q92928	RAB1B;RAB1C	Ras-related protein Rab-1B;Putative Ras-related protein Rab-1C	12	6	54.7	22.171	201	24.838		-3.56802	-2.41415	-1.15387		1.35093	0.888706	1.62367	+					4	4	5	5	5	6	2	1	1	1922900000		NaN	NaN	25.8837	27.0228	27.1794	26.7779	26.0659	26.2137	25.239		sp|Q9H0U4|RAB1B_HUMAN Ras-related protein Rab-1B OS=Homo sapiens GN=RAB1B PE=1 SV=1;tr|E9PLD0|E9PLD0_HUMAN Ras-related protein Rab-1B OS=Homo sapiens GN=RAB1B PE=1 SV=1;tr|A0A0D9R716|A0A0D9R716_CHLSB Uncharacterized protein OS=Chlorocebus sabaeus GN=RAB1B
3201	A0A0D9S7E4		Uncharacterized protein	3	1	27.5	13.308	120	25.241		-4.2995	-4.48113	0.181634		2.41646	3.26418	0.113064	+	+	+_+			1	1	1	1	1	1	1	1	1	1922400000		NaN	NaN	NaN	26.6702	25.3182	27.2441	26.5621	26.4081	26.8072		tr|A0A0D9S7E4|A0A0D9S7E4_CHLSB Uncharacterized protein OS=Chlorocebus sabaeus PE=4 SV=1
3438	A0A0D9SDL6;P08708;A0A0D9S9A8;H0YN88;A0A075B716;A0A0D9RXH4	RPS17	40S ribosomal protein S17	8	8	63	15.55	135	165.54		0.331153	0.0167821	0.314371		0.459528	0.0133169	0.341047						6	5	4	5	5	4	5	4	6	1915600000		26.6013	26.7534	25.939	26.4702	25.9047	25.9254	26.1787	25.9923	27.0724		tr|A0A0D9SDL6|A0A0D9SDL6_CHLSB Uncharacterized protein OS=Chlorocebus sabaeus GN=RPS17 PE=3 SV=1;sp|P08708|RS17_HUMAN 40S ribosomal protein S17 OS=Homo sapiens GN=RPS17 PE=1 SV=2;tr|A0A0D9S9A8|A0A0D9S9A8_CHLSB Uncharacterized protein OS=Chlorocebus sabaeus
4214	Q8WY22;A0A0D9S5C6	BRI3BP	BRI3-binding protein	5	5	19.5	27.835	251	25.983		-3.81415	-3.82692	0.0127722		3.01595	2.52694	0.00774618	+	+	+_+			2	4	4	4	4	3	0	0	0	1915300000		NaN	NaN	NaN	26.6856	26.9061	26.0428	27.0841	26.9811	25.6077		sp|Q8WY22|BRI3B_HUMAN BRI3-binding protein OS=Homo sapiens GN=BRI3BP PE=1 SV=1;tr|A0A0D9S5C6|A0A0D9S5C6_CHLSB Uncharacterized protein OS=Chlorocebus sabaeus GN=BRI3BP PE=4 SV=1
898	A0A0D9R582;P53801;A8MZH8;A8MXQ1	PTTG1IP	Pituitary tumor-transforming gene 1 protein-interacting protein	4	4	21.7	20.276	180	6.1955		-4.11976	-3.48658	-0.633176		3.34865	2.55457	0.599938	+	+	+_+			3	4	4	4	4	4	0	0	0	1901300000		NaN	NaN	NaN	26.435	26.7732	27.1767	26.6798	26.4776	25.328		tr|A0A0D9R582|A0A0D9R582_CHLSB Uncharacterized protein OS=Chlorocebus sabaeus GN=PTTG1IP PE=4 SV=1;sp|P53801|PTTG_HUMAN Pituitary tumor-transforming gene 1 protein-interacting protein OS=Homo sapiens GN=PTTG1IP PE=1 SV=1;tr|A8MZH8|A8MZH8_HUMAN Pituitary tu
4069	Q15043-2;Q15043-3;Q15043;E5RIP4	SLC39A14	Zinc transporter ZIP14	5	3	11.4	52.838	481	200.27		-3.30793	-2.8769	-0.431031		2.42636	2.20528	0.62783	+	+	+_+			3	3	3	2	2	3	2	0	0	1899700000		NaN	NaN	24.3435	27.1044	26.357	26.8247	26.3258	26.7131	25.9542		sp|Q15043-2|S39AE_HUMAN Isoform 2 of Zinc transporter ZIP14 OS=Homo sapiens GN=SLC39A14;sp|Q15043-3|S39AE_HUMAN Isoform 3 of Zinc transporter ZIP14 OS=Homo sapiens GN=SLC39A14;sp|Q15043|S39AE_HUMAN Zinc transporter ZIP14 OS=Homo sapiens GN=SLC39A14 PE=1 SV
426	C9J2Y9;A0A0D9QYL1;P30876;C9J4M6	POLR2B	DNA-directed RNA polymerase;DNA-directed RNA polymerase II subunit RPB2	20	20	20.7	133.06	1167	138.6		-3.71937	-4.00763	0.288259		4.14339	3.78023	0.57237	+	+	+_+			19	16	18	14	15	15	0	0	0	1898200000		NaN	NaN	NaN	26.5069	26.2728	26.5164	26.5759	26.452	27.133		tr|C9J2Y9|C9J2Y9_HUMAN DNA-directed RNA polymerase subunit beta OS=Homo sapiens GN=POLR2B PE=1 SV=2;tr|A0A0D9QYL1|A0A0D9QYL1_CHLSB DNA-directed RNA polymerase subunit beta OS=Chlorocebus sabaeus GN=POLR2B PE=3 SV=1;sp|P30876|RPB2_HUMAN DNA-directed RNA pol
3031	A0A0D9S4H8;P49023;F5GZ78;A0A1B0GTU4;P49023-2;P49023-3;P49023-4	PXN	Paxillin	13	13	34.3	64.557	591	136.04		0.771338	0.775653	-0.00431442		1.25081	1.21715	0.00584655						8	9	9	7	8	10	7	6	8	1897400000		26.992	27.3128	26.4891	26.0713	26.4748	25.9339	26.5121	25.9412	26.0137		tr|A0A0D9S4H8|A0A0D9S4H8_CHLSB Uncharacterized protein OS=Chlorocebus sabaeus GN=PXN PE=4 SV=1;sp|P49023|PAXI_HUMAN Paxillin OS=Homo sapiens GN=PXN PE=1 SV=3;tr|F5GZ78|F5GZ78_HUMAN Paxillin OS=Homo sapiens GN=PXN PE=1 SV=1;tr|A0A1B0GTU4|A0A1B0GTU4_HUMAN Pa
2463	A0A0D9RUN6	OXA1L	Uncharacterized protein	5	5	16	48.551	438	9.6092		-4.09332	-3.89244	-0.200881		3.22959	3.04424	0.214742	+	+	+_+			3	5	4	5	4	4	1	1	1	1897100000		NaN	NaN	NaN	26.3045	27.0082	26.3045	26.4026	26.7836	25.8283		tr|A0A0D9RUN6|A0A0D9RUN6_CHLSB Uncharacterized protein OS=Chlorocebus sabaeus GN=OXA1L PE=3 SV=1
333	D6RGI3;A0A0D9QX35;D6RER5;Q9NVA2;Q9NVA2-2;D6RDU5	SEPT11	Septin-11	13	12	36.7	49.005	425	98.496		-3.60233	-2.60833	-0.993999		4.05272	2.39428	1.18631	+	+	+_+			7	10	8	8	9	11	2	0	1	1884600000		NaN	NaN	23.7997	27.0552	26.8287	27.0785	25.834	26.7269	25.4194		tr|D6RGI3|D6RGI3_HUMAN Septin 11, isoform CRA_b OS=Homo sapiens GN=SEPT11 PE=1 SV=1;tr|A0A0D9QX35|A0A0D9QX35_CHLSB Uncharacterized protein OS=Chlorocebus sabaeus GN=SEPT11 PE=3 SV=1;tr|D6RER5|D6RER5_HUMAN Septin-11 OS=Homo sapiens GN=SEPT11 PE=1 SV=1;sp|Q9
318	A0A0D9QWQ0;D6REX3;O94979-6;O94979-3;O94979-10;O94979-4;O94979-9;O94979-2;O94979;O94979-8;H7BXG7;O94979-7;D6RHZ5	SEC31A	Protein transport protein Sec31A	18	18	19.5	132.85	1219	40.151		-2.93399	-2.82256	-0.111436		1.88692	2.17247	0.0879447	+	+	+_+			13	13	12	12	15	17	2	1	1	1882900000		NaN	NaN	24.6583	27.4401	26.1388	26.1416	26.2383	26.6591	26.4887		tr|A0A0D9QWQ0|A0A0D9QWQ0_CHLSB Uncharacterized protein OS=Chlorocebus sabaeus GN=SEC31A PE=4 SV=1;tr|D6REX3|D6REX3_HUMAN Protein transport protein Sec31A OS=Homo sapiens GN=SEC31A PE=1 SV=1;sp|O94979-6|SC31A_HUMAN Isoform 6 of Protein transport protein Sec
233	A0A0D9QVD7;E9PL01;A0A087WUC6;E9PI68;Q15005	SPCS2	Signal peptidase complex subunit 2	7	7	34.1	25.672	232	160.33		-2.66885	-1.88526	-0.783595		1.76227	1.141	0.947603	+					5	7	6	6	5	6	3	1	2	1882400000		NaN	24.8218	24.8158	26.7601	26.9502	26.7199	26.2381	26.5534	25.2879		tr|A0A0D9QVD7|A0A0D9QVD7_CHLSB Uncharacterized protein OS=Chlorocebus sabaeus GN=SPCS2 PE=4 SV=1;tr|E9PL01|E9PL01_HUMAN Signal peptidase complex subunit 2 OS=Homo sapiens GN=SPCS2 PE=1 SV=1;tr|A0A087WUC6|A0A087WUC6_HUMAN Signal peptidase complex subunit 2
177	A0A0D9QUJ1;Q8N3E9	PLCD3	1-phosphatidylinositol 4,5-bisphosphate phosphodiesterase delta-3	19	19	29.9	90.364	799	81.187		-3.86735	-3.8884	0.0210584		3.75175	3.59979	0.0335681	+	+	+_+			9	16	15	12	18	13	1	1	1	1881400000		NaN	NaN	NaN	26.7657	26.3783	26.4631	26.6237	26.8231	26.2235		tr|A0A0D9QUJ1|A0A0D9QUJ1_CHLSB Phosphoinositide phospholipase C OS=Chlorocebus sabaeus GN=PLCD3 PE=4 SV=1;sp|Q8N3E9|PLCD3_HUMAN 1-phosphatidylinositol 4,5-bisphosphate phosphodiesterase delta-3 OS=Homo sapiens GN=PLCD3 PE=1 SV=3
3846	P15924;P15924-3;P15924-2	DSP	Desmoplakin	142	18	47	331.77	2871	323.31		1.83808	1.47991	0.358172		1.07899	0.65296	0.193361						6	5	6	5	4	6	11	16	8	1881100000		29.0004	26.3382	27.838	25.7653	26.3111	25.5861	26.5636	24.9483	27.2251		sp|P15924|DESP_HUMAN Desmoplakin OS=Homo sapiens GN=DSP PE=1 SV=3;sp|P15924-3|DESP_HUMAN Isoform DSPIa of Desmoplakin OS=Homo sapiens GN=DSP;sp|P15924-2|DESP_HUMAN Isoform DPII of Desmoplakin OS=Homo sapiens GN=DSP
845	A0A0D9R4H6;A0A0D9R4H8;Q13885;Q9BVA1	TUBB2A;TUBB2B	Tubulin beta-2A chain;Tubulin beta-2B chain	32	5	78.7	49.923	445	70.501		-0.355098	-0.378146	0.0230484		0.36752	0.506694	0.0241715						5	5	5	5	5	5	4	3	4	1879700000		25.9701	26.365	25.3677	26.6835	25.7256	26.359	26.434	26.4248	25.9783		tr|A0A0D9R4H6|A0A0D9R4H6_CHLSB Tubulin beta chain OS=Chlorocebus sabaeus PE=3 SV=1;tr|A0A0D9R4H8|A0A0D9R4H8_CHLSB Tubulin beta chain OS=Chlorocebus sabaeus GN=TUBB2B PE=3 SV=1;sp|Q13885|TBB2A_HUMAN Tubulin beta-2A chain OS=Homo sapiens GN=TUBB2A PE=1 SV=1;
1837	A0A0D9RK02;O76031	CLPX	ATP-dependent Clp protease ATP-binding subunit clpX-like, mitochondrial	16	16	33.2	69.191	633	225.42		-2.22846	-1.76111	-0.467354		1.67453	1.17566	0.543263	+					9	12	12	13	13	15	2	2	1	1877800000		25.2058	NaN	24.7876	26.8072	26.5302	26.5776	26.1657	26.8151	25.5322		tr|A0A0D9RK02|A0A0D9RK02_CHLSB Uncharacterized protein OS=Chlorocebus sabaeus GN=CLPX PE=4 SV=1;sp|O76031|CLPX_HUMAN ATP-dependent Clp protease ATP-binding subunit clpX-like, mitochondrial OS=Homo sapiens GN=CLPX PE=1 SV=2
3404	A0A0D9SBZ2;Q99595	TIMM17A	Mitochondrial import inner membrane translocase subunit Tim17-A	5	4	44.4	18.013	171	25.437		-4.7284	-3.8186	-0.909794		3.64634	2.94488	1.06837	+	+	+_+			3	3	3	4	3	3	1	1	1	1877500000		NaN	NaN	NaN	26.4542	27.0402	27.1313	25.2981	26.4065	26.1918		tr|A0A0D9SBZ2|A0A0D9SBZ2_CHLSB Uncharacterized protein OS=Chlorocebus sabaeus GN=TIMM17A PE=4 SV=1;sp|Q99595|TI17A_HUMAN Mitochondrial import inner membrane translocase subunit Tim17-A OS=Homo sapiens GN=TIMM17A PE=1 SV=1
112	A0A0D9R2B8;A0A0A0MR51;O60427;O60427-2	FADS1	Fatty acid desaturase 1	7	6	16.2	57.889	501	32.868		-1.30898	-1.10545	-0.203535		1.68193	1.56943	0.273123						6	6	6	6	6	4	3	2	2	1875000000		25.645	24.7348	25.0829	26.8851	26.4275	26.0772	26.2737	26.5746	25.9308		tr|A0A0D9R2B8|A0A0D9R2B8_CHLSB Uncharacterized protein OS=Chlorocebus sabaeus GN=FADS1 PE=4 SV=1;tr|A0A0A0MR51|A0A0A0MR51_HUMAN Fatty acid desaturase 1 OS=Homo sapiens GN=FADS1 PE=1 SV=1;sp|O60427|FADS1_HUMAN Fatty acid desaturase 1 OS=Homo sapiens GN=FADS
3472	A0A0S2Z5D0;H3BUV4;A0A1B0GTU6;Q9NWW5;Q9NWW5-2;A0A1B0GU90;A0A1B0GW73;H3BNF1;A0A1B0GTV3;A0A1B0GUD2;A0A0D9RM00;H3BUT1	CLN6	Ceroid-lipofuscinosis neuronal protein 6	2	2	14	19.299	171	60.564		-3.49059	-3.94869	0.458102		3.07973	2.84962	0.447316	+	+	+_+			2	2	2	2	2	2	1	0	1	1860500000		NaN	NaN	NaN	26.5432	26.3444	25.827	26.6865	27.3684	26.034		tr|A0A0S2Z5D0|A0A0S2Z5D0_HUMAN Ceroid-lipofuscinosis neuronal 6 late infantile variant isoform 2 OS=Homo sapiens GN=CLN6 PE=2 SV=1;tr|H3BUV4|H3BUV4_HUMAN Ceroid-lipofuscinosis neuronal protein 6 OS=Homo sapiens GN=CLN6 PE=1 SV=1;tr|A0A1B0GTU6|A0A1B0GTU6_HU
1940	A0A0D9RLG7;Q96HY6;A0A0A0MRX2;Q96HY6-2	DDRGK1	DDRGK domain-containing protein 1	7	7	25.3	35.533	312	43.191		-3.61652	-3.3846	-0.231925		2.37672	2.40005	0.13438	+	+	+_+			3	7	5	6	6	5	1	1	1	1858400000		NaN	NaN	NaN	25.5824	26.7941	27.1756	26.7804	26.6195	25.4565		tr|A0A0D9RLG7|A0A0D9RLG7_CHLSB Uncharacterized protein OS=Chlorocebus sabaeus GN=DDRGK1 PE=4 SV=1;sp|Q96HY6|DDRGK_HUMAN DDRGK domain-containing protein 1 OS=Homo sapiens GN=DDRGK1 PE=1 SV=2;tr|A0A0A0MRX2|A0A0A0MRX2_HUMAN DDRGK domain-containing protein 1 O
1918	A0A0D9RL59;P51114;B4DXZ6;P51114-3;P51114-2;E9PFF5;E7EU85	FXR1	Fragile X mental retardation syndrome-related protein 1	16	14	25.2	73.128	648	62.056		0.92243	0.194754	0.727676		2.16067	0.236267	1.04397						12	10	10	7	6	5	9	9	10	1852600000		26.7007	27.0207	26.6157	26.0755	25.6207	25.8735	26.3454	26.2274	27.1801		tr|A0A0D9RL59|A0A0D9RL59_CHLSB Uncharacterized protein OS=Chlorocebus sabaeus GN=FXR1 PE=4 SV=1;sp|P51114|FXR1_HUMAN Fragile X mental retardation syndrome-related protein 1 OS=Homo sapiens GN=FXR1 PE=1 SV=3;tr|B4DXZ6|B4DXZ6_HUMAN Fragile X mental retardati
1756	A0A0D9RIT0;Q6YN16	HSDL2	Hydroxysteroid dehydrogenase-like protein 2	16	16	54.4	41.575	384	37.571		1.64675	2.04484	-0.398098		3.60548	3.05165	0.910412	+	+	+_+			10	10	10	9	9	11	9	9	9	1843500000		27.411	27.8091	27.4989	25.8496	25.8919	26.0374	25.8464	25.5674	25.1707		tr|A0A0D9RIT0|A0A0D9RIT0_CHLSB Uncharacterized protein OS=Chlorocebus sabaeus GN=HSDL2 PE=4 SV=1;sp|Q6YN16|HSDL2_HUMAN Hydroxysteroid dehydrogenase-like protein 2 OS=Homo sapiens GN=HSDL2 PE=1 SV=1
2936	A0A0D9S2T3;Q9ULV4;Q9ULV4-2;Q9ULV4-3;B4E3S0	CORO1C	Coronin-1C;Coronin	19	19	33.3	54.284	483	142.01		0.0363566	-1.57949	1.61585		0.030141	0.280006	0.28874						19	3	3	4	7	2	0	0	0	1843100000		NaN	NaN	NaN	22.5993	22.9682	23.4676	22.4659	22.2959	29.1209		tr|A0A0D9S2T3|A0A0D9S2T3_CHLSB Coronin OS=Chlorocebus sabaeus GN=CORO1C PE=3 SV=1;sp|Q9ULV4|COR1C_HUMAN Coronin-1C OS=Homo sapiens GN=CORO1C PE=1 SV=1;sp|Q9ULV4-2|COR1C_HUMAN Isoform 2 of Coronin-1C OS=Homo sapiens GN=CORO1C;sp|Q9ULV4-3|COR1C_HUMAN Isoform
3744	O43390;O43390-3;O43390-2;B4DT28;O43390-4;A0A0D9S897	HNRNPR	Heterogeneous nuclear ribonucleoprotein R	21	16	37.9	70.942	633	276.71		-0.22282	-2.81068	2.58786		0.138288	0.589944	0.517376						16	2	3	2	3	2	1	2	2	1834100000		22.1344	21.7046	NaN	21.1538	22.643	23.0135	22.8973	22.5814	29.0952		sp|O43390|HNRPR_HUMAN Heterogeneous nuclear ribonucleoprotein R OS=Homo sapiens GN=HNRNPR PE=1 SV=1;sp|O43390-3|HNRPR_HUMAN Isoform 3 of Heterogeneous nuclear ribonucleoprotein R OS=Homo sapiens GN=HNRNPR;sp|O43390-2|HNRPR_HUMAN Isoform 2 of Heterogeneous
4166	Q86VI3;F2Z2E2	IQGAP3	Ras GTPase-activating-like protein IQGAP3	77	6	46.3	184.7	1631	180.67		-3.5587	-3.15239	-0.406306		3.50474	2.40899	0.339131	+	+	+_+			4	4	4	5	4	6	1	0	0	1825600000		NaN	NaN	NaN	26.7443	26.9678	26.3637	26.6115	26.8729	25.3726		sp|Q86VI3|IQGA3_HUMAN Ras GTPase-activating-like protein IQGAP3 OS=Homo sapiens GN=IQGAP3 PE=1 SV=2;tr|F2Z2E2|F2Z2E2_HUMAN Ras GTPase-activating-like protein IQGAP3 OS=Homo sapiens GN=IQGAP3 PE=1 SV=1
2158	A0A0D9RPZ1;E9PJN0;O14734	ACOT8	Acyl-coenzyme A thioesterase 8	8	8	35.4	36.001	319	87.658		-0.322211	-0.356539	0.0343285		0.310121	0.329333	0.0486634						6	8	8	6	6	8	4	6	6	1800700000		25.8649	26.5335	25.1485	25.9145	26.1984	26.4005	26.2722	26.5076	25.8366		tr|A0A0D9RPZ1|A0A0D9RPZ1_CHLSB Uncharacterized protein OS=Chlorocebus sabaeus GN=ACOT8 PE=4 SV=1;tr|E9PJN0|E9PJN0_HUMAN Acyl-coenzyme A thioesterase 8 OS=Homo sapiens GN=ACOT8 PE=1 SV=1;sp|O14734|ACOT8_HUMAN Acyl-coenzyme A thioesterase 8 OS=Homo sapiens G
4244	Q96QU8;Q96QU8-2	XPO6	Exportin-6	21	9	20.5	128.88	1125	55.121		-4.80289	-4.39425	-0.408647		4.5748	3.75886	0.526752	+	+	+_+			4	6	7	6	8	8	0	0	0	1799500000		NaN	NaN	NaN	26.5037	26.5424	27.0394	26.2397	26.8185	25.8013		sp|Q96QU8|XPO6_HUMAN Exportin-6 OS=Homo sapiens GN=XPO6 PE=1 SV=1;sp|Q96QU8-2|XPO6_HUMAN Isoform 2 of Exportin-6 OS=Homo sapiens GN=XPO6
992	A0A0D9R6N7;I3L4X2;P33527-2;P33527;P33527-9;A0A0A0MS99;P33527-5;P33527-3;P33527-6;P33527-4;P33527-8;P33527-7	ABCC1	Multidrug resistance-associated protein 1	19	18	17.1	171.74	1531	53.185		-3.85322	-3.48529	-0.367936		3.10123	2.53622	0.456366	+	+	+_+			9	16	14	16	15	12	1	1	0	1794800000		NaN	NaN	NaN	26.8088	26.6695	26.5682	26.5682	26.7348	25.6398		tr|A0A0D9R6N7|A0A0D9R6N7_CHLSB Uncharacterized protein OS=Chlorocebus sabaeus PE=4 SV=1;tr|I3L4X2|I3L4X2_HUMAN Multidrug resistance-associated protein 1 (Fragment) OS=Homo sapiens GN=ABCC1 PE=1 SV=1;sp|P33527-2|MRP1_HUMAN Isoform 2 of Multidrug resistance-
1368	A0A0D9RCQ3	FASTKD2	Uncharacterized protein	19	13	33.7	79.736	694	137.69		-3.603	-3.28165	-0.321354		4.34196	3.9237	0.52102	+	+	+_+			10	12	9	11	13	10	1	1	1	1791500000		NaN	NaN	NaN	26.2556	26.6934	26.8347	26.4469	26.5127	25.8601		tr|A0A0D9RCQ3|A0A0D9RCQ3_CHLSB Uncharacterized protein OS=Chlorocebus sabaeus GN=FASTKD2 PE=4 SV=1
529	A0A0D9QZY3	SCD	Uncharacterized protein	3	3	14.2	41.383	359	38.872		-3.28972	-2.78774	-0.501986		4.38888	2.69423	0.582272	+	+	+_+			3	3	3	3	2	3	1	0	0	1790000000		NaN	NaN	NaN	26.5958	26.6403	26.9468	25.7469	26.9497	25.9803		tr|A0A0D9QZY3|A0A0D9QZY3_CHLSB Uncharacterized protein OS=Chlorocebus sabaeus GN=SCD PE=3 SV=1
3304	A0A0D9S8R7;Q9NVH1-3;Q9NVH1;Q9NVH1-2;Q5TH61	DNAJC11	DnaJ homolog subfamily C member 11	12	12	26.5	63.259	559	52.358		-3.93278	-3.73308	-0.199707		4.04848	4.50523	0.356453	+	+	+_+			9	10	10	9	11	8	1	1	1	1788200000		NaN	NaN	NaN	26.169	26.7474	26.8072	26.4067	26.5542	26.1635		tr|A0A0D9S8R7|A0A0D9S8R7_CHLSB Uncharacterized protein OS=Chlorocebus sabaeus GN=DNAJC11 PE=4 SV=1;sp|Q9NVH1-3|DJC11_HUMAN Isoform 3 of DnaJ homolog subfamily C member 11 OS=Homo sapiens GN=DNAJC11;sp|Q9NVH1|DJC11_HUMAN DnaJ homolog subfamily C member 11 O
3283	A0A0D9S8F8;P21912	SDHB	Succinate dehydrogenase [ubiquinone] iron-sulfur subunit, mitochondrial	11	11	36.8	31.528	280	18.464		0.915298	0.822937	0.0923608		1.92411	1.69514	0.251543						8	4	9	10	9	8	7	7	7	1758800000		26.7532	27.3798	27.2251	26.1071	26.3853	26.1198	26.5229	26.1618	26.2045		tr|A0A0D9S8F8|A0A0D9S8F8_CHLSB Succinate dehydrogenase [ubiquinone] iron-sulfur subunit, mitochondrial OS=Chlorocebus sabaeus GN=SDHB PE=3 SV=1;sp|P21912|SDHB_HUMAN Succinate dehydrogenase [ubiquinone] iron-sulfur subunit, mitochondrial OS=Homo sapiens GN=
353	A0A0D9QXE9;Q9Y6Y8;Q9Y6Y8-2	SEC23IP	SEC23-interacting protein	14	14	16.3	107.43	970	35.807		-2.41744	-1.93919	-0.478251		1.10094	0.961822	0.485297						11	9	9	9	13	13	2	3	3	1751700000		24.8831	25.2624	NaN	27.3861	26.2794	25.9991	26.1204	26.1649	25.9446		tr|A0A0D9QXE9|A0A0D9QXE9_CHLSB Uncharacterized protein OS=Chlorocebus sabaeus GN=SEC23IP PE=4 SV=1;sp|Q9Y6Y8|S23IP_HUMAN SEC23-interacting protein OS=Homo sapiens GN=SEC23IP PE=1 SV=1;sp|Q9Y6Y8-2|S23IP_HUMAN Isoform 2 of SEC23-interacting protein OS=Homo s
3316	A0A0D9S8Z2;Q9BRK5;Q9BRK5-2;Q9BRK5-6;H0Y3T6	SDF4	45 kDa calcium-binding protein	10	10	33.1	41.877	362	78.099		0.53774	0.254655	0.283085		0.428675	0.303162	0.255466						6	8	8	8	7	10	3	4	5	1750200000		26.8185	26.5624	25.7431	26.079	26.4251	25.0066	26.2151	26.2397	25.9052		tr|A0A0D9S8Z2|A0A0D9S8Z2_CHLSB Uncharacterized protein OS=Chlorocebus sabaeus GN=SDF4 PE=4 SV=1;sp|Q9BRK5|CAB45_HUMAN 45 kDa calcium-binding protein OS=Homo sapiens GN=SDF4 PE=1 SV=1;sp|Q9BRK5-2|CAB45_HUMAN Isoform 2 of 45 kDa calcium-binding protein OS=Ho
1497	A0A0D9RET1;O75027;O75027-2;B4DGL8;A0A087WW65;O75027-3	ABCB7	ATP-binding cassette sub-family B member 7, mitochondrial	14	14	28.5	76.919	698	123.48		-4.1118	-3.94325	-0.168542		3.8694	3.19199	0.22216	+	+	+_+			11	12	12	12	14	12	0	1	1	1748900000		NaN	NaN	NaN	26.4703	26.5843	26.5647	26.5956	26.7296	25.7885		tr|A0A0D9RET1|A0A0D9RET1_CHLSB Uncharacterized protein OS=Chlorocebus sabaeus GN=ABCB7 PE=4 SV=1;sp|O75027|ABCB7_HUMAN ATP-binding cassette sub-family B member 7, mitochondrial OS=Homo sapiens GN=ABCB7 PE=1 SV=2;sp|O75027-2|ABCB7_HUMAN Isoform 2 of ATP-bin
3865	Q32Q12;P22392-2;A0A0D9QZN3;J3KPD9;P22392;E7ERL0	NME1-NME2;NME2;NME1	Nucleoside diphosphate kinase;Nucleoside diphosphate kinase B	10	4	52.7	32.642	292	49.478		2.75713	1.2287	1.52842		0.974153	1.85043	0.502741						4	4	3	1	3	3	3	3	3	1748600000		27.3347	27.7347	28.0207	26.6837	NaN	25.7633	26.429	26.1114	26.8636		tr|Q32Q12|Q32Q12_HUMAN Nucleoside diphosphate kinase OS=Homo sapiens GN=NME1-NME2 PE=1 SV=1;sp|P22392-2|NDKB_HUMAN Isoform 3 of Nucleoside diphosphate kinase B OS=Homo sapiens GN=NME2;tr|A0A0D9QZN3|A0A0D9QZN3_CHLSB Nucleoside diphosphate kinase OS=Chloroce
751	A0A0D9R357;K7EJC8;E9PCW1;G5E9T8;O95249;B4DQA8;O95249-2	GOSR1	Golgi SNAP receptor complex member 1	9	9	39.6	28.653	250	106.94		-3.51517	-3.97378	0.458611		3.6169	3.40044	0.828741	+	+	+_+			4	7	7	6	8	5	0	0	0	1745100000		NaN	NaN	NaN	26.0421	26.2064	26.3285	26.8231	26.9579	26.1717		tr|A0A0D9R357|A0A0D9R357_CHLSB Golgi SNAP receptor complex member 1 OS=Chlorocebus sabaeus GN=GOSR1 PE=3 SV=1;tr|K7EJC8|K7EJC8_HUMAN Golgi SNAP receptor complex member 1 OS=Homo sapiens GN=GOSR1 PE=1 SV=1;tr|E9PCW1|E9PCW1_HUMAN Golgi SNAP receptor complex
2402	A0A0D9RTP8;Q86U38	NOP9	Nucleolar protein 9	14	14	32.6	69.921	639	50.591		-3.69992	-3.64854	-0.0513808		3.58527	3.55372	0.114675	+	+	+_+			12	12	11	8	9	10	0	0	0	1743200000		NaN	NaN	NaN	26.7235	26.3404	26.4598	26.5143	26.6238	26.2315		tr|A0A0D9RTP8|A0A0D9RTP8_CHLSB Uncharacterized protein OS=Chlorocebus sabaeus GN=NOP9 PE=4 SV=1;sp|Q86U38|NOP9_HUMAN Nucleolar protein 9 OS=Homo sapiens GN=NOP9 PE=1 SV=1
634	A0A0D9R1J1	HELLS	Uncharacterized protein	16	6	28.1	82.672	713	209.21		-1.56775	-1.75868	0.190934		0.55617	0.628999	0.178653						6	5	6	5	5	5	1	3	3	1740100000		25.9076	25.6421	NaN	25.6037	26.4745	26.2941	26.5783	26.6647	25.7022		tr|A0A0D9R1J1|A0A0D9R1J1_CHLSB Uncharacterized protein OS=Chlorocebus sabaeus GN=HELLS PE=4 SV=1
744	A0A0D9R339;Q99460;A0A087WW66;Q99460-2	PSMD1	26S proteasome non-ATPase regulatory subunit 1	18	18	28.4	106.81	958	130.85		-1.77976	-1.71518	-0.064579		1.05704	0.983845	0.0841538						12	13	13	14	14	13	2	4	3	1738200000		25.1372	25.5071	NaN	26.5798	26.1791	26.226	26.736	26.1072	25.948		tr|A0A0D9R339|A0A0D9R339_CHLSB Uncharacterized protein OS=Chlorocebus sabaeus GN=PSMD1 PE=4 SV=1;sp|Q99460|PSMD1_HUMAN 26S proteasome non-ATPase regulatory subunit 1 OS=Homo sapiens GN=PSMD1 PE=1 SV=2;tr|A0A087WW66|A0A087WW66_HUMAN 26S proteasome non-ATPas
2370	A0A0D9RT90	QSOX2	Sulfhydryl oxidase	20	8	47.4	65.026	576	155.74		-3.83787	-3.33764	-0.500226		3.28337	2.66243	0.341604	+	+	+_+			4	4	5	5	4	4	1	1	1	1732900000		NaN	NaN	NaN	25.7099	26.8657	26.8057	26.6433	26.1913	25.0461		tr|A0A0D9RT90|A0A0D9RT90_CHLSB Sulfhydryl oxidase OS=Chlorocebus sabaeus GN=QSOX2 PE=4 SV=1
1332	A0A0D9RC33;Q5XKP0	QIL1	Protein QIL1	5	5	60.2	13.041	118	22.499		-3.61583	-4.12443	0.508598		2.36663	2.71681	0.74142	+	+	+_+			5	5	4	3	5	5	0	0	1	1730900000		NaN	NaN	NaN	26.6218	25.6436	26.1509	26.3796	26.718	26.8445		tr|A0A0D9RC33|A0A0D9RC33_CHLSB MICOS complex subunit MIC13 OS=Chlorocebus sabaeus GN=C19orf70 PE=3 SV=1;sp|Q5XKP0|MIC13_HUMAN MICOS complex subunit MIC13 OS=Homo sapiens GN=MIC13 PE=1 SV=1
1207	A0A0D9RA44;Q8WUY1;H0YAR9	THEM6	Protein THEM6	9	9	54.3	23.931	208	15.442		-3.5723	-3.63351	0.0612081		3.56931	3.34426	0.113486	+	+	+_+			7	5	8	8	8	6	0	0	0	1727600000		NaN	NaN	NaN	26.3497	26.5453	26.3707	26.4318	26.8271	26.1905		tr|A0A0D9RA44|A0A0D9RA44_CHLSB Uncharacterized protein OS=Chlorocebus sabaeus GN=THEM6 PE=4 SV=1;sp|Q8WUY1|THEM6_HUMAN Protein THEM6 OS=Homo sapiens GN=THEM6 PE=1 SV=2;tr|H0YAR9|H0YAR9_HUMAN Protein THEM6 (Fragment) OS=Homo sapiens GN=THEM6 PE=1 SV=1
814	A0A0D9R467;H7C5G1;Q2TAA2	IAH1	Isoamyl acetate-hydrolyzing esterase 1 homolog	11	11	54.4	27.586	248	69.045		2.39807	1.96077	0.437298		3.20526	2.76794	0.64607	+	+	+_+			8	7	8	4	4	8	9	7	8	1724900000		27.5503	27.9549	27.949	25.7686	25.4383	25.0531	26.2976	25.72	25.5543		tr|A0A0D9R467|A0A0D9R467_CHLSB Uncharacterized protein OS=Chlorocebus sabaeus GN=IAH1 PE=4 SV=1;tr|H7C5G1|H7C5G1_HUMAN Isoamyl acetate-hydrolyzing esterase 1 homolog (Fragment) OS=Homo sapiens GN=IAH1 PE=1 SV=1;sp|Q2TAA2|IAH1_HUMAN Isoamyl acetate-hydrolyz
3784	O96005;A0A0D9S1S1;O96005-3;O96005-4	CLPTM1	Cleft lip and palate transmembrane protein 1	6	6	9.9	76.096	669	35.74		-4.05889	-3.65159	-0.407302		4.5028	3.96954	0.684648	+	+	+_+			4	5	5	5	5	5	1	0	1	1723700000		NaN	NaN	NaN	26.3083	26.8347	26.7591	26.598	26.2287	25.8534		sp|O96005|CLPT1_HUMAN Cleft lip and palate transmembrane protein 1 OS=Homo sapiens GN=CLPTM1 PE=1 SV=1;tr|A0A0D9S1S1|A0A0D9S1S1_CHLSB Uncharacterized protein OS=Chlorocebus sabaeus GN=CLPTM1 PE=4 SV=1;sp|O96005-3|CLPT1_HUMAN Isoform 2 of Cleft lip and pala
1148	A0A0D9R8Y0;O00161	SNAP23	Synaptosomal-associated protein 23	9	9	63.5	23.224	211	56.095		-4.34421	-4.12338	-0.220825		3.93305	3.84251	0.468195	+	+	+_+			7	8	6	7	7	7	0	0	0	1723600000		NaN	NaN	NaN	26.8618	26.4609	26.4037	26.2946	26.1397	26.6297		tr|A0A0D9R8Y0|A0A0D9R8Y0_CHLSB Synaptosomal-associated protein OS=Chlorocebus sabaeus GN=SNAP23 PE=3 SV=1;sp|O00161|SNP23_HUMAN Synaptosomal-associated protein 23 OS=Homo sapiens GN=SNAP23 PE=1 SV=1
955	A0A0D9R626;Q9NSD9;Q9NSD9-2	FARSB	Phenylalanine--tRNA ligase beta subunit	21	21	36	66.223	589	33.797		2.44436	1.86719	0.577166		4.9594	2.92389	1.20809	+	+	+_+			9	11	10	8	7	5	16	14	15	1713400000		27.8917	27.9699	28.1234	25.6656	25.5171	25.4693	26.5503	25.9994	25.8337		tr|A0A0D9R626|A0A0D9R626_CHLSB Uncharacterized protein OS=Chlorocebus sabaeus GN=FARSB PE=4 SV=1;sp|Q9NSD9|SYFB_HUMAN Phenylalanine--tRNA ligase beta subunit OS=Homo sapiens GN=FARSB PE=1 SV=3;sp|Q9NSD9-2|SYFB_HUMAN Isoform 2 of Phenylalanine--tRNA ligase
1524	A0A0D9RF94;P05026-2;P05026;V9GYR2	ATP1B1	Sodium/potassium-transporting ATPase subunit beta-1	8	8	38.9	35.001	303	23.932		-0.982408	-0.942338	-0.0400696		0.81495	0.748361	0.0579791						6	6	6	5	6	7	4	3	2	1711800000		24.8213	26.5198	24.974	26.1711	26.613	26.4782	26.7432	26.3466	26.0524		tr|A0A0D9RF94|A0A0D9RF94_CHLSB Sodium/potassium-transporting ATPase subunit beta OS=Chlorocebus sabaeus GN=ATP1B1 PE=3 SV=1;sp|P05026-2|AT1B1_HUMAN Isoform 2 of Sodium/potassium-transporting ATPase subunit beta-1 OS=Homo sapiens GN=ATP1B1;sp|P05026|AT1B1_H
647	C9JXB8;C9JNW5;A0A0D9R1R4;P83731;A0A0D9SAP5	RPL24	60S ribosomal protein L24	8	8	54.5	14.369	121	23.97		0.232292	-0.547906	0.780197		0.960365	0.317601	0.475621						7	4	6	5	5	5	4	4	4	1709100000		25.9789	26.0936	25.9149	25.9341	25.5863	25.7701	25.9774	25.7095	27.9441		tr|C9JXB8|C9JXB8_HUMAN 60S ribosomal protein L24 OS=Homo sapiens GN=RPL24 PE=1 SV=1;tr|C9JNW5|C9JNW5_HUMAN 60S ribosomal protein L24 OS=Homo sapiens GN=RPL24 PE=1 SV=1;tr|A0A0D9R1R4|A0A0D9R1R4_CHLSB Uncharacterized protein OS=Chlorocebus sabaeus PE=4 SV=1;
3424	H7C2W9;C9JU56;A0A0D9SCR9;B7Z4E3;B7Z4C8;P62899-3;P62899;P62899-2;B8ZZK4	RPL31	60S ribosomal protein L31	8	8	54.6	12.701	108	14.018		0.372145	0.224567	0.147579		0.217697	0.120288	0.111968						7	6	3	6	5	3	4	4	4	1708400000		27.1888	26.9383	25.3302	25.5413	26.655	26.1445	25.9759	25.8449	26.9628		tr|H7C2W9|H7C2W9_HUMAN 60S ribosomal protein L31 (Fragment) OS=Homo sapiens GN=RPL31 PE=1 SV=1;tr|C9JU56|C9JU56_HUMAN 60S ribosomal protein L31 (Fragment) OS=Homo sapiens GN=RPL31 PE=1 SV=1;tr|A0A0D9SCR9|A0A0D9SCR9_CHLSB Uncharacterized protein OS=Chloroce
2925	A0A0D9S2L0;P54920;M0R0Y2;M0R2M1	NAPA	Alpha-soluble NSF attachment protein	12	12	53.6	33.232	295	286.07		-0.951465	-0.494865	-0.4566		2.1647	0.829081	0.877597						6	8	10	9	9	9	5	5	4	1708300000		25.1511	25.618	25.6524	26.6031	26.3693	26.3034	26.1882	26.1982	25.5196		tr|A0A0D9S2L0|A0A0D9S2L0_CHLSB Uncharacterized protein OS=Chlorocebus sabaeus GN=NAPA PE=4 SV=1;sp|P54920|SNAA_HUMAN Alpha-soluble NSF attachment protein OS=Homo sapiens GN=NAPA PE=1 SV=3;tr|M0R0Y2|M0R0Y2_HUMAN Alpha-soluble NSF attachment protein OS=Homo
2627	A0A0D9RXN5;Q08J23-2;Q08J23;Q08J23-3	NSUN2	tRNA (cytosine(34)-C(5))-methyltransferase	16	16	30	86.348	767	65.891		0.480077	0.428795	0.0512822		1.08007	0.522839	0.0450113						11	14	14	12	15	15	5	5	6	1705200000		26.3909	26.4292	26.0965	25.5187	26.144	25.8137	26.2057	26.2372	25.1873		tr|A0A0D9RXN5|A0A0D9RXN5_CHLSB Uncharacterized protein OS=Chlorocebus sabaeus GN=NSUN2 PE=3 SV=1;sp|Q08J23-2|NSUN2_HUMAN Isoform 2 of tRNA (cytosine(34)-C(5))-methyltransferase OS=Homo sapiens GN=NSUN2;sp|Q08J23|NSUN2_HUMAN tRNA (cytosine(34)-C(5))-methylt
1304	A0A0D9RBK4;Q9Y263;E5RIM3	PLAA	Phospholipase A-2-activating protein	16	16	29.1	87.291	795	74.022		-2.44608	-2.08079	-0.365291		1.24398	1.04068	0.803989	+					11	12	13	15	13	13	2	1	1	1692700000		NaN	NaN	25.8555	26.2939	26.5293	26.5661	26.383	26.178	25.7325		tr|A0A0D9RBK4|A0A0D9RBK4_CHLSB Uncharacterized protein OS=Chlorocebus sabaeus GN=PLAA PE=4 SV=1;sp|Q9Y263|PLAP_HUMAN Phospholipase A-2-activating protein OS=Homo sapiens GN=PLAA PE=1 SV=2;tr|E5RIM3|E5RIM3_HUMAN Phospholipase A-2-activating protein OS=Homo
915	A0A0D9R5I2;O95159;E9PQ47;E9PNY1;E9PQA5	ZFPL1	Zinc finger protein-like 1	8	8	27.4	34.086	310	77.258		-3.10015	-3.3995	0.299353		1.97874	2.28223	0.396397	+	+	+_+			7	8	8	6	6	6	0	0	0	1691000000		NaN	NaN	NaN	26.8498	26.1226	25.8075	26.5995	26.6759	26.4026		tr|A0A0D9R5I2|A0A0D9R5I2_CHLSB Uncharacterized protein OS=Chlorocebus sabaeus GN=ZFPL1 PE=4 SV=1;sp|O95159|ZFPL1_HUMAN Zinc finger protein-like 1 OS=Homo sapiens GN=ZFPL1 PE=1 SV=2;tr|E9PQ47|E9PQ47_HUMAN Zinc finger protein-like 1 (Fragment) OS=Homo sapien
1674	A0A0D9RHH5;Q9HB71;Q9HB71-3	CACYBP	Calcyclin-binding protein	11	11	49.6	26.196	228	46.759		0.94648	0.757103	0.189377		0.844661	0.995452	0.135664						7	7	7	6	5	8	6	5	5	1687200000		26.7729	26.7204	27.518	26.8833	25.9625	25.3261	25.9338	26.7336	26.0726		tr|A0A0D9RHH5|A0A0D9RHH5_CHLSB Uncharacterized protein OS=Chlorocebus sabaeus GN=CACYBP PE=4 SV=1;sp|Q9HB71|CYBP_HUMAN Calcyclin-binding protein OS=Homo sapiens GN=CACYBP PE=1 SV=2;sp|Q9HB71-3|CYBP_HUMAN Isoform 3 of Calcyclin-binding protein OS=Homo sapie
2543	A0A0D9RWA3;Q8IUW5;D6RBN9	RELL1	RELT-like protein 1	2	2	10.3	29.373	271	51.996		-3.77229	-3.42133	-0.35096		5.73571	3.55975	0.541812	+	+	+_+			2	2	2	2	2	2	0	0	0	1679200000		NaN	NaN	NaN	26.7077	26.4945	26.5337	26.4047	26.5965	25.6818		tr|A0A0D9RWA3|A0A0D9RWA3_CHLSB Uncharacterized protein OS=Chlorocebus sabaeus GN=RELL1 PE=4 SV=1;sp|Q8IUW5|RELL1_HUMAN RELT-like protein 1 OS=Homo sapiens GN=RELL1 PE=1 SV=1;tr|D6RBN9|D6RBN9_HUMAN RELT-like protein 1 (Fragment) OS=Homo sapiens GN=RELL1 PE=
2150	A0A0D9RPU6;Q6PGP7	TTC37	Tetratricopeptide repeat protein 37	23	23	18.5	175.31	1564	103.52		-3.7986	-3.51338	-0.285222		2.54845	2.40752	0.666363	+	+	+_+			17	17	18	16	15	19	0	0	0	1678600000		NaN	NaN	NaN	26.7834	26.5714	26.3528	26.5484	26.2709	26.0327		tr|A0A0D9RPU6|A0A0D9RPU6_CHLSB Uncharacterized protein OS=Chlorocebus sabaeus GN=TTC37 PE=4 SV=1;sp|Q6PGP7|TTC37_HUMAN Tetratricopeptide repeat protein 37 OS=Homo sapiens GN=TTC37 PE=1 SV=1
1991	A0A0D9RMA6;P52701;P52701-4;P52701-3;A0A087WWJ1;P52701-2	MSH6	DNA mismatch repair protein Msh6	17	17	15.2	152.73	1360	71.184		-1.89805	-1.50886	-0.389191		2.10728	1.65231	0.774857	+					10	13	12	14	13	10	4	3	2	1675500000		24.0757	24.3198	25.2739	26.2285	26.5089	26.6262	26.3266	26.1951	25.6744		tr|A0A0D9RMA6|A0A0D9RMA6_CHLSB Uncharacterized protein OS=Chlorocebus sabaeus GN=MSH6 PE=3 SV=1;sp|P52701|MSH6_HUMAN DNA mismatch repair protein Msh6 OS=Homo sapiens GN=MSH6 PE=1 SV=2;sp|P52701-4|MSH6_HUMAN Isoform 4 of DNA mismatch repair protein Msh6 OS=
4006	P78347-2;P78347-4;P78347-3;P78347;A0A0D9S030	GTF2I	General transcription factor II-I	15	15	24.3	107.97	957	38.767		-3.64596	-3.95487	0.308907		2.83748	2.97143	0.189123	+	+	+_+			13	8	9	7	4	11	1	0	1	1675200000		NaN	NaN	NaN	27.0263	26.1855	25.4987	26.6443	25.7358	27.2571		sp|P78347-2|GTF2I_HUMAN Isoform 2 of General transcription factor II-I OS=Homo sapiens GN=GTF2I;sp|P78347-4|GTF2I_HUMAN Isoform 4 of General transcription factor II-I OS=Homo sapiens GN=GTF2I;sp|P78347-3|GTF2I_HUMAN Isoform 3 of General transcription facto
4082	Q16401;A0A0D9RL72;Q16401-2	PSMD5	26S proteasome non-ATPase regulatory subunit 5	13	13	34.3	56.195	504	169.88		-3.66945	-3.12194	-0.547504		3.80699	4.17823	0.880187	+	+	+_+			11	13	12	10	8	12	1	2	1	1671500000		22.8153	NaN	NaN	27.041	26.1899	26.6502	26.06	26.354	25.8248		sp|Q16401|PSMD5_HUMAN 26S proteasome non-ATPase regulatory subunit 5 OS=Homo sapiens GN=PSMD5 PE=1 SV=3;tr|A0A0D9RL72|A0A0D9RL72_CHLSB Uncharacterized protein OS=Chlorocebus sabaeus GN=PSMD5 PE=4 SV=1;sp|Q16401-2|PSMD5_HUMAN Isoform 2 of 26S proteasome non
2496	A0A0D9RV84;Q9UKM7;H0YG20;H0YGV7	MAN1B1	Endoplasmic reticulum mannosyl-oligosaccharide 1,2-alpha-mannosidase;alpha-1,2-Mannosidase	11	11	20.1	79.391	698	32.828		-2.8008	-3.18735	0.386548		3.08312	3.9296	0.707987	+	+	+_+			9	8	8	9	11	10	0	0	0	1670500000		NaN	NaN	NaN	26.5812	26.3186	25.7766	26.4984	26.7601	26.5774		tr|A0A0D9RV84|A0A0D9RV84_CHLSB alpha-1,2-Mannosidase OS=Chlorocebus sabaeus GN=MAN1B1 PE=3 SV=1;sp|Q9UKM7|MA1B1_HUMAN Endoplasmic reticulum mannosyl-oligosaccharide 1,2-alpha-mannosidase OS=Homo sapiens GN=MAN1B1 PE=1 SV=2;tr|H0YG20|H0YG20_HUMAN alpha-1,2-
2827	A0A0D9S0X9;Q70UQ0;Q70UQ0-2	IKBIP	Inhibitor of nuclear factor kappa-B kinase-interacting protein	14	10	41.4	39.282	350	84.605		-4.25139	-3.67859	-0.572802		3.25994	3.21251	0.484409	+	+	+_+			6	8	8	10	9	8	1	1	1	1668700000		NaN	NaN	NaN	25.8411	27.0908	26.8971	26.301	26.4422	25.3675		tr|A0A0D9S0X9|A0A0D9S0X9_CHLSB Uncharacterized protein OS=Chlorocebus sabaeus GN=IKBIP PE=4 SV=1;sp|Q70UQ0|IKIP_HUMAN Inhibitor of nuclear factor kappa-B kinase-interacting protein OS=Homo sapiens GN=IKBIP PE=1 SV=1;sp|Q70UQ0-2|IKIP_HUMAN Isoform 2 of Inhi
890	A0A0D9R507;Q8NBJ4-2;Q8NBJ4	GOLM1	Golgi membrane protein 1	11	11	32.4	45.901	404	80.806		-1.43898	-1.34629	-0.0926882		0.528931	0.492188	0.202226						9	10	10	9	8	11	2	1	2	1668500000		NaN	25.9956	25.7878	26.3233	26.259	25.849	26.0896	26.1944	25.8693		tr|A0A0D9R507|A0A0D9R507_CHLSB Uncharacterized protein OS=Chlorocebus sabaeus GN=GOLM1 PE=4 SV=1;sp|Q8NBJ4-2|GOLM1_HUMAN Isoform 2 of Golgi membrane protein 1 OS=Homo sapiens GN=GOLM1;sp|Q8NBJ4|GOLM1_HUMAN Golgi membrane protein 1 OS=Homo sapiens GN=GOLM1
190	A0A0D9QUS7	C4orf3	Uncharacterized protein	2	2	8	22.149	199	5.8701		-3.68194	-3.62303	-0.0589021		3.13318	4.29935	0.0511293	+	+	+_+			2	2	2	2	2	2	1	1	1	1667400000		NaN	NaN	NaN	26.8875	26.5941	25.6592	26.3667	26.538	26.0593		tr|A0A0D9QUS7|A0A0D9QUS7_CHLSB Uncharacterized protein OS=Chlorocebus sabaeus GN=C4orf3 PE=4 SV=1
1426	E7EU96;A0A0D9RDK2;P68400;Q8NEV1;P68400-2	CSNK2A1;CSNK2A3	Casein kinase II subunit alpha;Casein kinase II subunit alpha 3	13	12	41.6	45.31	385	87.19		-1.62342	-2.41373	0.790306		1.8829	1.50412	0.537844	+	+	+_+			12	11	8	9	10	9	2	1	2	1667000000		NaN	24.6136	24.2886	25.7392	25.8508	25.555	25.9336	25.7944	27.788		tr|E7EU96|E7EU96_HUMAN Casein kinase II subunit alpha OS=Homo sapiens GN=CSNK2A1 PE=1 SV=1;tr|A0A0D9RDK2|A0A0D9RDK2_CHLSB Uncharacterized protein OS=Chlorocebus sabaeus PE=3 SV=1;sp|P68400|CSK21_HUMAN Casein kinase II subunit alpha OS=Homo sapiens GN=CSNK2
123	B6VEX4;A0A0A0MRT6;A0A0D9RHT9;Q8IZP0-10;Q8IZP0-8;Q8IZP0-7;Q8IZP0-2;Q8IZP0-4;Q8IZP0-3;Q8IZP0-5;Q8IZP0-6;Q8IZP0-9;Q8IZP0;Q8IZP0-12;Q8IZP0-11	ABI1	Abl interactor 1	8	8	22.4	43.294	393	78.101		-0.401538	0.489104	-0.890642		1.3301	1.176	1.87897						7	6	6	6	7	7	5	5	5	1662900000		26.0353	26.2245	26.3221	26.732	26.3703	26.6843	25.5369	26.0577	25.5199		tr|B6VEX4|B6VEX4_HUMAN Abl interactor 1 OS=Homo sapiens GN=ABI1 PE=1 SV=1;tr|A0A0A0MRT6|A0A0A0MRT6_HUMAN Abl interactor 1 OS=Homo sapiens GN=ABI1 PE=1 SV=1;tr|A0A0D9RHT9|A0A0D9RHT9_CHLSB Uncharacterized protein OS=Chlorocebus sabaeus GN=ABI1 PE=4 SV=1;sp|Q
3920	P41091;Q2VIR3;F8W810;Q2VIR3-2	EIF2S3;EIF2S3L	Eukaryotic translation initiation factor 2 subunit 3;Putative eukaryotic translation initiation factor 2 subunit 3-like protein	12	12	37.3	51.109	472	87.934		-0.687028	-1.1227	0.435677		0.804568	1.04465	0.395328						9	8	6	7	8	9	5	7	4	1661000000		25.65	24.7066	25.6315	26.4701	25.939	25.6401	26.0693	26.0403	27.2466		sp|P41091|IF2G_HUMAN Eukaryotic translation initiation factor 2 subunit 3 OS=Homo sapiens GN=EIF2S3 PE=1 SV=3;sp|Q2VIR3|IF2GL_HUMAN Putative eukaryotic translation initiation factor 2 subunit 3-like protein OS=Homo sapiens GN=EIF2S3L PE=5 SV=2;tr|F8W810|F8
4232	Q96EY1;Q96EY1-2;Q96EY1-3	DNAJA3	DnaJ homolog subfamily A member 3, mitochondrial	11	3	22.1	52.488	480	119.3		-0.569874	-0.309801	-0.260073		0.805783	0.347059	0.37095						3	3	3	3	3	3	3	3	3	1654200000		25.8924	26.1905	25.2392	26.0115	26.4747	26.5456	26.5405	25.9892	25.7218		sp|Q96EY1|DNJA3_HUMAN DnaJ homolog subfamily A member 3, mitochondrial OS=Homo sapiens GN=DNAJA3 PE=1 SV=2;sp|Q96EY1-2|DNJA3_HUMAN Isoform 2 of DnaJ homolog subfamily A member 3, mitochondrial OS=Homo sapiens GN=DNAJA3;sp|Q96EY1-3|DNJA3_HUMAN Isoform 3 of
309	A0A0D9QWM0;O76003	GLRX3	Glutaredoxin-3	13	13	46.6	37.481	335	126.92		1.4656	1.40184	0.0637658		3.60465	2.34413	0.101333	+					4	5	7	7	6	7	10	10	11	1654000000		27.402	27.5696	27.2035	25.8305	26.0178	25.9301	26.2455	25.553	26.1712		tr|A0A0D9QWM0|A0A0D9QWM0_CHLSB Uncharacterized protein OS=Chlorocebus sabaeus GN=GLRX3 PE=4 SV=1;sp|O76003|GLRX3_HUMAN Glutaredoxin-3 OS=Homo sapiens GN=GLRX3 PE=1 SV=2
1655	A0A0D9RH60;Q9NP72;Q9NP72-2;A0A087X163;Q5W0J0;H0Y6T8;Q9NP72-3	RAB18	Ras-related protein Rab-18	11	11	60.2	22.977	206	40.452		0.0222416	0.124842	-0.102601		0.0543494	0.238858	0.27111						8	10	8	8	8	9	8	8	5	1653400000		26.0388	26.5137	26.3639	26.3044	26.2932	26.252	25.9462	26.1335	26.4621		tr|A0A0D9RH60|A0A0D9RH60_CHLSB Uncharacterized protein OS=Chlorocebus sabaeus GN=RAB18 PE=4 SV=1;sp|Q9NP72|RAB18_HUMAN Ras-related protein Rab-18 OS=Homo sapiens GN=RAB18 PE=1 SV=1;sp|Q9NP72-2|RAB18_HUMAN Isoform 2 of Ras-related protein Rab-18 OS=Homo sap
4304	Q9NZM1-6;Q9NZM1;Q9NZM1-3;Q9NZM1-2;Q9NZM1-5;H0YD14	MYOF	Myoferlin	74	7	42.8	233.47	2048	16.135		-0.701473	-0.431222	-0.270251		1.81456	0.837516	0.663616						6	5	5	6	6	5	2	3	4	1653200000		25.4584	25.4694	25.9514	26.3618	26.2141	26.4076	25.9476	26.4005	25.8246		sp|Q9NZM1-6|MYOF_HUMAN Isoform 6 of Myoferlin OS=Homo sapiens GN=MYOF;sp|Q9NZM1|MYOF_HUMAN Myoferlin OS=Homo sapiens GN=MYOF PE=1 SV=1;sp|Q9NZM1-3|MYOF_HUMAN Isoform 3 of Myoferlin OS=Homo sapiens GN=MYOF;sp|Q9NZM1-2|MYOF_HUMAN Isoform 2 of Myoferlin OS=Ho
583	A0A0D9R0N1	MMS19	Uncharacterized protein	39	8	51.5	113.31	1030	323.31		-3.26411	-3.0268	-0.237302		3.92031	4.45477	0.593327	+	+	+_+			5	6	5	8	7	6	0	0	0	1649000000		NaN	NaN	NaN	26.1792	26.0141	26.5872	26.106	26.0419	25.9207		tr|A0A0D9R0N1|A0A0D9R0N1_CHLSB Uncharacterized protein OS=Chlorocebus sabaeus GN=MMS19 PE=4 SV=1
3760	O75340-2;O75340;A0A0D9RXX8;A0A024QZ42	PDCD6	Programmed cell death protein 6	6	6	47.6	21.664	189	25.721		0.543255	0.745054	-0.201799		1.30208	1.44332	0.472341						5	6	5	4	5	6	4	4	5	1648100000		26.2183	26.6415	26.8072	26.0584	26.1338	25.8451	26.0512	25.8828	25.4979		sp|O75340-2|PDCD6_HUMAN Isoform 2 of Programmed cell death protein 6 OS=Homo sapiens GN=PDCD6;sp|O75340|PDCD6_HUMAN Programmed cell death protein 6 OS=Homo sapiens GN=PDCD6 PE=1 SV=1;tr|A0A0D9RXX8|A0A0D9RXX8_CHLSB Uncharacterized protein OS=Chlorocebus sab
770	A0A0D9R3G2;O95197-3;B7Z4M1;O95197-6;O95197-5;O95197-4;O95197-7;O95197-2;O95197	RTN3	Reticulon-3;Reticulon	2	2	11	25.509	236	7.7188		-0.798734	-3.59842	2.79968		0.194114	4.13713	0.826228		+				1	2	2	1	1	2	0	0	0	1645600000		NaN	NaN	NaN	26.5344	NaN	NaN	26.199	26.0567	26.3897		tr|A0A0D9R3G2|A0A0D9R3G2_CHLSB Reticulon OS=Chlorocebus sabaeus PE=4 SV=1;sp|O95197-3|RTN3_HUMAN Isoform 3 of Reticulon-3 OS=Homo sapiens GN=RTN3;tr|B7Z4M1|B7Z4M1_HUMAN Reticulon OS=Homo sapiens GN=RTN3 PE=1 SV=1;sp|O95197-6|RTN3_HUMAN Isoform 6 of Reticul
1828	A0A0D9RJW6;Q6YHU6-2	THADA	Thyroid adenoma-associated protein	50	16	36.1	203.19	1803	323.31		-4.21756	-3.69726	-0.520295		2.94193	2.55326	0.866138	+	+	+_+			13	12	10	10	11	13	0	0	0	1639100000		NaN	NaN	NaN	26.4617	26.6649	26.7818	26.4444	26.3081	25.5951		tr|A0A0D9RJW6|A0A0D9RJW6_CHLSB Uncharacterized protein OS=Chlorocebus sabaeus GN=THADA PE=4 SV=1;sp|Q6YHU6-2|THADA_HUMAN Isoform 2 of Thyroid adenoma-associated protein OS=Homo sapiens GN=THADA
813	A0A0D9SAG1;A0A0D9S9Z6;A0A0D9R464;H7BY10;K7EJV9;K7ERT8;A8MUS3;P62750;A0A0D9SA43;K7EMA7;A0A0D9RZC1	RPL23A	60S ribosomal protein L23a	7	7	42.9	17.695	156	10.797		1.03042	-1.1111	2.14151		0.467142	0.826633	0.904763						6	2	3	4	3	1	4	5	6	1637300000		25.7644	25.6761	25.1278	NaN	25.2052	25.6302	26.121	25.9693	27.8112		tr|A0A0D9SAG1|A0A0D9SAG1_CHLSB Uncharacterized protein OS=Chlorocebus sabaeus PE=3 SV=1;tr|A0A0D9S9Z6|A0A0D9S9Z6_CHLSB Uncharacterized protein OS=Chlorocebus sabaeus PE=3 SV=1;tr|A0A0D9R464|A0A0D9R464_CHLSB Uncharacterized protein OS=Chlorocebus sabaeus PE
1217	A0A0D9RAF7;Q8WUM4;Q8WUM4-2	PDCD6IP	Programmed cell death 6-interacting protein	24	24	38.1	96.063	868	107.99		1.77659	1.47144	0.305148		3.24161	2.9564	0.642708	+	+	+_+			13	10	12	9	9	11	21	19	15	1634600000		27.655	27.5061	27.8227	26.1508	25.8837	25.6195	26.257	25.9035	26.409		tr|A0A0D9RAF7|A0A0D9RAF7_CHLSB Uncharacterized protein OS=Chlorocebus sabaeus GN=PDCD6IP PE=4 SV=1;sp|Q8WUM4|PDC6I_HUMAN Programmed cell death 6-interacting protein OS=Homo sapiens GN=PDCD6IP PE=1 SV=1;sp|Q8WUM4-2|PDC6I_HUMAN Isoform 2 of Programmed cell d
4310	Q9P258	RCC2	Protein RCC2	26	5	60.7	56.084	522	323.31		7.0626	7.5967	0		4.92517	4.28403	-4.34294e-08	+	+	+_+			1	1	0	1	1	1	4	5	5	1632100000		29.1822	29.311	28.5373	NaN	NaN	NaN	NaN	NaN	NaN		sp|Q9P258|RCC2_HUMAN Protein RCC2 OS=Homo sapiens GN=RCC2 PE=1 SV=2
1448	A0A0D9RDU8;Q96BY7	ATG2B	Autophagy-related protein 2 homolog B	26	25	16	232.69	2078	177.44		-3.36264	-3.19348	-0.169159		5.05625	4.93587	1.35388	+	+	+_+			18	19	20	19	19	21	0	1	0	1623500000		NaN	NaN	NaN	26.5123	26.4691	26.3826	26.3254	26.334	26.1972		tr|A0A0D9RDU8|A0A0D9RDU8_CHLSB Uncharacterized protein OS=Chlorocebus sabaeus GN=ATG2B PE=4 SV=1;sp|Q96BY7|ATG2B_HUMAN Autophagy-related protein 2 homolog B OS=Homo sapiens GN=ATG2B PE=1 SV=5
2551	A0A0D9RWF4;P35222;B4DGU4	CTNNB1	Catenin beta-1	20	16	39.6	85.496	781	115.62		-3.058	-3.34147	0.283473		1.52626	1.61955	0.502046	+	+	+_+			10	9	6	11	10	15	1	2	1	1618200000		24.8653	NaN	NaN	26.3383	26.119	25.9475	26.0883	26.3332	26.8338		tr|A0A0D9RWF4|A0A0D9RWF4_CHLSB Uncharacterized protein OS=Chlorocebus sabaeus GN=CTNNB1 PE=4 SV=1;sp|P35222|CTNB1_HUMAN Catenin beta-1 OS=Homo sapiens GN=CTNNB1 PE=1 SV=1;tr|B4DGU4|B4DGU4_HUMAN Catenin beta-1 OS=Homo sapiens GN=CTNNB1 PE=1 SV=1
3455	A0A0D9SE44;P62854;Q5JNZ5	RPS26;RPS26P11	40S ribosomal protein S26;Putative 40S ribosomal protein S26-like 1	4	4	39.1	13.015	115	10.309		-0.402828	-0.741116	0.338287		0.913369	0.524115	0.202915						4	2	2	3	3	3	2	3	3	1612000000		25.7956	25.4931	25.6359	26.2262	26.2354	25.6714	25.5668	25.992	27.5891		tr|A0A0D9SE44|A0A0D9SE44_CHLSB 40S ribosomal protein S26 OS=Chlorocebus sabaeus GN=RPS26 PE=3 SV=1;sp|P62854|RS26_HUMAN 40S ribosomal protein S26 OS=Homo sapiens GN=RPS26 PE=1 SV=3;sp|Q5JNZ5|RS26L_HUMAN Putative 40S ribosomal protein S26-like 1 OS=Homo sap
1179	A0A0D9R9H7	TMEM261	Uncharacterized protein	3	3	29.5	11.915	112	12.507		-3.668	-4.47169	0.803686		2.61634	3.39907	0.985025	+	+	+_+			3	3	2	2	2	2	1	0	1	1609800000		NaN	NaN	NaN	26.5866	25.5475	25.4372	26.5237	26.8797	26.579		tr|A0A0D9R9H7|A0A0D9R9H7_CHLSB Uncharacterized protein OS=Chlorocebus sabaeus GN=TMEM261 PE=4 SV=1
1066	A0A0D9R7V1;E9PQR7;Q9UK41;Q9UK41-2;E9PM90	VPS28	Vacuolar protein sorting-associated protein 28 homolog	8	8	38.1	26.148	231	29.324		0.201662	0.784208	-0.582546		0.605284	1.04754	0.734867						5	8	7	6	7	7	5	5	5	1608700000		26.3842	26.5521	26.264	26.4393	26.0288	26.1272	25.9162	25.9972	24.9342		tr|A0A0D9R7V1|A0A0D9R7V1_CHLSB Uncharacterized protein OS=Chlorocebus sabaeus GN=VPS28 PE=3 SV=1;tr|E9PQR7|E9PQR7_HUMAN Vacuolar protein sorting-associated protein 28 homolog (Fragment) OS=Homo sapiens GN=VPS28 PE=1 SV=1;sp|Q9UK41|VPS28_HUMAN Vacuolar prot
2353	A0A0D9RT14;A0A0C4DFX9;Q9H3P2;H0Y3X6;C9JHL4	NELFA	Negative elongation factor A	15	11	37.3	58.445	539	41.15		-4.60804	-3.53221	-1.07583		4.82596	3.76258	1.57965	+	+	+_+			8	9	9	9	10	11	0	1	0	1606100000		NaN	NaN	NaN	26.4706	26.8625	27.0789	25.9355	26.0323	25.2167		tr|A0A0D9RT14|A0A0D9RT14_CHLSB Uncharacterized protein OS=Chlorocebus sabaeus GN=NELFA PE=4 SV=1;tr|A0A0C4DFX9|A0A0C4DFX9_HUMAN Negative elongation factor A OS=Homo sapiens GN=NELFA PE=1 SV=1;sp|Q9H3P2|NELFA_HUMAN Negative elongation factor A OS=Homo sapie
[truncated: 1,368 more rows]
